# Supplementary material for: Membrane bound COMT isoform is an interfacial enzyme: general mechanism and new drug design paradigm
Source: Royal Society of Chemistry journal article supplement (doi:10.1039/c8cc00221e), 2018-01-01
Supplement: c8cc00221e2.xlsx [file c8cc00221e2.xlsx]

## Sheet: Uniprot Queries
Uniprot queries
		Proteins	Human	Others	Structures	Uniprot Queries
Catalytic Proteins	Sequence	257021	10456	246565		ec:*
	Structures	9395	1806	7589		ec:* database:(type:pdb)
Catalytic Membrane Proteins	Sequence	21837	1179	20658		ec:* annotation:(type:transmem)
	Structures	628	191	437		ec:* annotation:(type:transmem) database:(type:pdb)
Catalytic Bitopic Membrane Proteins	Sequence	5857	582	5275		ec:* annotation:(type:transmem) locations:(location:single)
	Structures	362	163	199		ec:* annotation:(type:transmem) locations:(location:single) database:(type:pdb)
Catalytic Bitopic Membrane Proteins with isoforms	Sequence	643	317	326		soluble OR secreted OR cytoplasm locations:(location:single) ec:* isoform NOT locations:(note:cleavage) annotation:(type:transmem)
	Structures	140	113	27		soluble OR secreted OR cytoplasm locations:(location:single) ec:* isoform NOT locations:(note:cleavage) annotation:(type:transmem) database:(type:pdb)
Catalytic Bitopic Membrane Proteins + ions	Sequence	1337	136	1201		Script
	Structures	117	46	71		Script
Catalytic Bitopic Membrane Proteins + Cofactors	Sequence	1099	128	971		Script
	Structures	139	81	58		Script
Catalytic Bitopic Membrane Proteins + Cofactors + Ions	Sequence	121	27	94		Script
	Structures	23	13	10		Script
Catalytic Bitopic Membrane Proteins with isoforms + Ions	Sequence	162	77	85		Script
	Structures	34	30	4		Script
Catalytic Bitopic Membrane Proteins with isoforms + Cofactors	Sequence	202	87	115		Script
	Structures	76	59	17		Script
Catalytic Bitopic Membrane Proteins with isoforms + Cofactors + Ions	Sequence	31	16	15		Script
	Structures	10	7	3		Script
* Catalytic Bitopic Proteins = CBP

## Sheet: CBP
Catalytic binding proteins
Entry	EC number	Binding site	Protein names	Gene names	Organism	Subcellular location [CC]	Cofactor	Metal binding	Cross-reference (ProteinModelPortal)
Q91FG3	3.4.-.-		Probable cysteine proteinase 361L (EC 3.4.-.-)	IIV6-361L	Invertebrate iridescent virus 6 (IIV-6) (Chilo iridescent virus)	SUBCELLULAR LOCATION: Membrane {ECO:0000305}; Single-pass membrane protein {ECO:0000305}.			Q91FG3;
P14060	1.1.1.145; 5.3.3.1	BINDING 159 159 NAD. {ECO:0000250}.	3 beta-hydroxysteroid dehydrogenase/Delta 5-->4-isomerase type 1 (3 beta-hydroxysteroid dehydrogenase/Delta 5-->4-isomerase type I) (3-beta-HSD I) (Trophoblast antigen FDO161G) [Includes: 3-beta-hydroxy-Delta(5)-steroid dehydrogenase (EC 1.1.1.145) (3-beta-hydroxy-5-ene steroid dehydrogenase) (Progesterone reductase); Steroid Delta-isomerase (EC 5.3.3.1) (Delta-5-3-ketosteroid isomerase)]	HSD3B1 3BH HSDB3A	Homo sapiens (Human)	SUBCELLULAR LOCATION: Endoplasmic reticulum membrane; Single-pass membrane protein. Mitochondrion membrane; Single-pass membrane protein.			P14060;
P27365	1.1.1.145; 5.3.3.1	BINDING 159 159 NAD. {ECO:0000250}.	3 beta-hydroxysteroid dehydrogenase/Delta 5-->4-isomerase type 1 (3 beta-hydroxysteroid dehydrogenase/Delta 5-->4-isomerase type I) (3-beta-HSD I) [Includes: 3-beta-hydroxy-Delta(5)-steroid dehydrogenase (EC 1.1.1.145) (3-beta-hydroxy-5-ene steroid dehydrogenase) (Progesterone reductase); Steroid Delta-isomerase (EC 5.3.3.1) (Delta-5-3-ketosteroid isomerase)]	HSD3B1	Macaca mulatta (Rhesus macaque)	SUBCELLULAR LOCATION: Endoplasmic reticulum membrane; Single-pass membrane protein. Mitochondrion membrane; Single-pass membrane protein.			P27365;
Q60555	1.1.1.145; 5.3.3.1	BINDING 159 159 NAD. {ECO:0000250}.	3 beta-hydroxysteroid dehydrogenase/Delta 5-->4-isomerase type 1 (3 beta-hydroxysteroid dehydrogenase/Delta 5-->4-isomerase type I) (3-beta-HSD I) [Includes: 3-beta-hydroxy-Delta(5)-steroid dehydrogenase (EC 1.1.1.145) (3-beta-hydroxy-5-ene steroid dehydrogenase) (Progesterone reductase); Steroid Delta-isomerase (EC 5.3.3.1) (Delta-5-3-ketosteroid isomerase)]	HSD3B1	Mesocricetus auratus (Golden hamster)	SUBCELLULAR LOCATION: Endoplasmic reticulum membrane; Single-pass membrane protein. Mitochondrion membrane; Single-pass membrane protein.			Q60555;
P24815	1.1.1.145; 5.3.3.1	BINDING 159 159 NAD. {ECO:0000250}.	3 beta-hydroxysteroid dehydrogenase/Delta 5-->4-isomerase type 1 (3 beta-hydroxysteroid dehydrogenase/Delta 5-->4-isomerase type I) (3-beta-HSD I) [Includes: 3-beta-hydroxy-Delta(5)-steroid dehydrogenase (EC 1.1.1.145) (3-beta-hydroxy-5-ene steroid dehydrogenase) (Progesterone reductase); Steroid Delta-isomerase (EC 5.3.3.1) (Delta-5-3-ketosteroid isomerase)]	Hsd3b1 Hsd3b	Mus musculus (Mouse)	SUBCELLULAR LOCATION: Endoplasmic reticulum membrane; Single-pass membrane protein. Mitochondrion membrane; Single-pass membrane protein.			P24815;
P22071	1.1.1.145; 5.3.3.1	BINDING 159 159 NAD. {ECO:0000250}.	3 beta-hydroxysteroid dehydrogenase/Delta 5-->4-isomerase type 1 (3 beta-hydroxysteroid dehydrogenase/Delta 5-->4-isomerase type I) (3-beta-HSD I) [Includes: 3-beta-hydroxy-Delta(5)-steroid dehydrogenase (EC 1.1.1.145) (3-beta-hydroxy-5-ene steroid dehydrogenase) (Progesterone reductase); Steroid Delta-isomerase (EC 5.3.3.1) (Delta-5-3-ketosteroid isomerase)]	Hsd3b1	Rattus norvegicus (Rat)	SUBCELLULAR LOCATION: Endoplasmic reticulum membrane; Single-pass membrane protein. Mitochondrion membrane; Single-pass membrane protein.			P22071;
P26439	1.1.1.145; 5.3.3.1	BINDING 158 158 NAD. {ECO:0000250}.	3 beta-hydroxysteroid dehydrogenase/Delta 5-->4-isomerase type 2 (3 beta-hydroxysteroid dehydrogenase/Delta 5-->4-isomerase type II) (3-beta-HSD II) (3-beta-HSD adrenal and gonadal type) [Includes: 3-beta-hydroxy-Delta(5)-steroid dehydrogenase (EC 1.1.1.145) (3-beta-hydroxy-5-ene steroid dehydrogenase) (Progesterone reductase); Steroid Delta-isomerase (EC 5.3.3.1) (Delta-5-3-ketosteroid isomerase…	HSD3B2 HSDB3B	Homo sapiens (Human)	SUBCELLULAR LOCATION: Endoplasmic reticulum membrane; Single-pass membrane protein. Mitochondrion membrane; Single-pass membrane protein.			P26439;
Q64421	1.1.1.145; 5.3.3.1	BINDING 159 159 NAD. {ECO:0000250}.	3 beta-hydroxysteroid dehydrogenase/Delta 5-->4-isomerase type 2 (3 beta-hydroxysteroid dehydrogenase/Delta 5-->4-isomerase type II) (3-beta-HSD II) [Includes: 3-beta-hydroxy-Delta(5)-steroid dehydrogenase (EC 1.1.1.145) (3-beta-hydroxy-5-ene steroid dehydrogenase) (Progesterone reductase); Steroid Delta-isomerase (EC 5.3.3.1) (Delta-5-3-ketosteroid isomerase)]	HSD3B2	Mesocricetus auratus (Golden hamster)	SUBCELLULAR LOCATION: Endoplasmic reticulum membrane; Single-pass membrane protein. Mitochondrion membrane; Single-pass membrane protein.			Q64421;
P26149	1.1.1.145; 5.3.3.1	BINDING 159 159 NAD. {ECO:0000250}.	3 beta-hydroxysteroid dehydrogenase/Delta 5-->4-isomerase type 2 (3 beta-hydroxysteroid dehydrogenase/Delta 5-->4-isomerase type II) (3-beta-HSD II) [Includes: 3-beta-hydroxy-Delta(5)-steroid dehydrogenase (EC 1.1.1.145) (3-beta-hydroxy-5-ene steroid dehydrogenase) (Progesterone reductase); Steroid Delta-isomerase (EC 5.3.3.1) (Delta-5-3-ketosteroid isomerase)]	Hsd3b2	Mus musculus (Mouse)	SUBCELLULAR LOCATION: Endoplasmic reticulum membrane; Single-pass membrane protein. Mitochondrion membrane; Single-pass membrane protein.			P26149;
P22072	1.1.1.145; 5.3.3.1	BINDING 159 159 NAD. {ECO:0000250}.	3 beta-hydroxysteroid dehydrogenase/Delta 5-->4-isomerase type 2 (3 beta-hydroxysteroid dehydrogenase/Delta 5-->4-isomerase type II) (3-beta-HSD II) [Includes: 3-beta-hydroxy-Delta(5)-steroid dehydrogenase (EC 1.1.1.145) (3-beta-hydroxy-5-ene steroid dehydrogenase) (Progesterone reductase); Steroid Delta-isomerase (EC 5.3.3.1) (Delta-5-3-ketosteroid isomerase)]	Hsd3b	Rattus norvegicus (Rat)	SUBCELLULAR LOCATION: Endoplasmic reticulum membrane; Single-pass membrane protein. Mitochondrion membrane; Single-pass membrane protein.			P22072;
O35296	1.1.1.-	BINDING 159 159 NAD. {ECO:0000250}.	3 beta-hydroxysteroid dehydrogenase type 3 (3 beta-hydroxysteroid dehydrogenase type III) (3-beta-HSD III) (3-beta-hydroxy-5-ene steroid dehydrogenase) (NADP-dependent 3-beta-hydroxy-Delta(5)-steroid dehydrogenase) (EC 1.1.1.-) (Progesterone reductase)	HSD3B3	Mesocricetus auratus (Golden hamster)	SUBCELLULAR LOCATION: Endoplasmic reticulum membrane; Single-pass membrane protein. Mitochondrion membrane; Single-pass membrane protein.			O35296;
P26150	1.1.1.145; 5.3.3.1	BINDING 159 159 NAD. {ECO:0000250}.	3 beta-hydroxysteroid dehydrogenase/Delta 5-->4-isomerase type 3 (3 beta-hydroxysteroid dehydrogenase/Delta 5-->4-isomerase type III) (3-beta-HSD III) [Includes: 3-beta-hydroxy-Delta(5)-steroid dehydrogenase (EC 1.1.1.145) (3-beta-hydroxy-5-ene steroid dehydrogenase) (Progesterone reductase); Steroid Delta-isomerase (EC 5.3.3.1) (Delta-5-3-ketosteroid isomerase)]	Hsd3b3	Mus musculus (Mouse)	SUBCELLULAR LOCATION: Endoplasmic reticulum membrane; Single-pass membrane protein. Mitochondrion membrane; Single-pass membrane protein.			P26150;
Q61767	1.1.1.-	BINDING 159 159 NAD. {ECO:0000250}.	3 beta-hydroxysteroid dehydrogenase type 4 (3 beta-hydroxysteroid dehydrogenase type IV) (3-beta-HSD IV) (3-beta-hydroxy-5-ene steroid dehydrogenase) (NADPH-dependent 3-beta-hydroxy-Delta(5)-steroid dehydrogenase) (EC 1.1.1.-) (Progesterone reductase)	Hsd3b4	Mus musculus (Mouse)	SUBCELLULAR LOCATION: Endoplasmic reticulum membrane; Single-pass membrane protein. Mitochondrion membrane; Single-pass membrane protein.			Q61767;
Q62878	1.1.1.145; 5.3.3.1	BINDING 159 159 NAD. {ECO:0000250}.	3 beta-hydroxysteroid dehydrogenase/Delta 5-->4-isomerase type 4 (3 beta-hydroxysteroid dehydrogenase/Delta 5-->4-isomerase type IV) (3-beta-HSD IV) [Includes: 3-beta-hydroxy-Delta(5)-steroid dehydrogenase (EC 1.1.1.145) (3-beta-hydroxy-5-ene steroid dehydrogenase) (Progesterone reductase); Steroid Delta-isomerase (EC 5.3.3.1) (Delta-5-3-ketosteroid isomerase)]	Hsd3b6	Rattus norvegicus (Rat)	SUBCELLULAR LOCATION: Endoplasmic reticulum membrane; Single-pass membrane protein. Mitochondrion membrane; Single-pass membrane protein.			Q62878;
Q61694	1.1.1.-	BINDING 159 159 NAD. {ECO:0000250}.	3 beta-hydroxysteroid dehydrogenase type 5 (3 beta-hydroxysteroid dehydrogenase type V) (3-beta-HSD V) (3-beta-hydroxy-5-ene steroid dehydrogenase) (NADPH-dependent 3-beta-hydroxy-Delta(5)-steroid dehydrogenase) (EC 1.1.1.-) (Progesterone reductase)	Hsd3b5	Mus musculus (Mouse)	SUBCELLULAR LOCATION: Endoplasmic reticulum membrane; Single-pass membrane protein. Mitochondrion membrane; Single-pass membrane protein.			Q61694;
P27364	1.1.1.-	BINDING 159 159 NAD. {ECO:0000250}.	3 beta-hydroxysteroid dehydrogenase type 5 (3 beta-hydroxysteroid dehydrogenase type V) (3-beta-HSD V) (3-beta-hydroxy-5-ene steroid dehydrogenase) (NADPH-dependent 3-beta-hydroxy-Delta(5)-steroid dehydrogenase) (EC 1.1.1.-) (Progesterone reductase)	Hsd3b5 Hsd3b	Rattus norvegicus (Rat)	SUBCELLULAR LOCATION: Endoplasmic reticulum membrane; Single-pass membrane protein. Mitochondrion membrane; Single-pass membrane protein.			P27364;
O35469	1.1.1.-; 1.1.1.145; 5.3.3.1	BINDING 159 159 NAD. {ECO:0000250}.	3 beta-hydroxysteroid dehydrogenase/Delta 5-->4-isomerase type 6 (EC 1.1.1.-) (3 beta-hydroxysteroid dehydrogenase/Delta 5-->4-isomerase type VI) (3-beta-HSD VI) [Includes: 3-beta-hydroxy-Delta(5)-steroid dehydrogenase (EC 1.1.1.145) (3-beta-hydroxy-5-ene steroid dehydrogenase) (Progesterone reductase); Steroid Delta-isomerase (EC 5.3.3.1) (Delta-5-3-ketosteroid isomerase)]	Hsd3b6	Mus musculus (Mouse)	SUBCELLULAR LOCATION: Endoplasmic reticulum membrane; Single-pass membrane protein. Mitochondrion membrane; Single-pass membrane protein.			O35469;
P14893	1.1.1.145; 5.3.3.1	BINDING 159 159 NAD. {ECO:0000250}.	3 beta-hydroxysteroid dehydrogenase/Delta 5-->4-isomerase (3-beta-HSD) [Includes: 3-beta-hydroxy-Delta(5)-steroid dehydrogenase (EC 1.1.1.145) (3-beta-hydroxy-5-ene steroid dehydrogenase) (Progesterone reductase); Steroid Delta-isomerase (EC 5.3.3.1) (Delta-5-3-ketosteroid isomerase)]	HSD3B	Bos taurus (Bovine)	SUBCELLULAR LOCATION: Endoplasmic reticulum membrane; Single-pass membrane protein. Mitochondrion membrane; Single-pass membrane protein.			P14893;
Q5IFP1	1.1.1.145; 5.3.3.1	BINDING 159 159 NAD. {ECO:0000250}.	3 beta-hydroxysteroid dehydrogenase/Delta 5-->4-isomerase (3-beta-HSD) [Includes: 3-beta-hydroxy-Delta(5)-steroid dehydrogenase (EC 1.1.1.145) (3-beta-hydroxy-5-ene steroid dehydrogenase) (Progesterone reductase); Steroid Delta-isomerase (EC 5.3.3.1) (Delta-5-3-ketosteroid isomerase)]	HSD3B	Canis familiaris (Dog) (Canis lupus familiaris)	SUBCELLULAR LOCATION: Endoplasmic reticulum membrane {ECO:0000250}; Single-pass membrane protein {ECO:0000250}. Mitochondrion membrane {ECO:0000250}; Single-pass membrane protein {ECO:0000250}.			Q5IFP1;
O46516	1.1.1.145; 5.3.3.1	BINDING 159 159 NAD. {ECO:0000250}.	3 beta-hydroxysteroid dehydrogenase/Delta 5-->4-isomerase (3-beta-HSD) [Includes: 3-beta-hydroxy-Delta(5)-steroid dehydrogenase (EC 1.1.1.145) (3-beta-hydroxy-5-ene steroid dehydrogenase) (Progesterone reductase); Steroid Delta-isomerase (EC 5.3.3.1) (Delta-5-3-ketosteroid isomerase)]	HSD3B	Equus caballus (Horse)	SUBCELLULAR LOCATION: Endoplasmic reticulum membrane; Single-pass membrane protein. Mitochondrion membrane; Single-pass membrane protein.			O46516;
Q9N119	1.1.1.145; 5.3.3.1	BINDING 159 159 NAD. {ECO:0000250}.	3 beta-hydroxysteroid dehydrogenase/Delta 5-->4-isomerase (3-beta-HSD) [Includes: 3-beta-hydroxy-Delta(5)-steroid dehydrogenase (EC 1.1.1.145) (3-beta-hydroxy-5-ene steroid dehydrogenase) (Progesterone reductase); Steroid Delta-isomerase (EC 5.3.3.1) (Delta-5-3-ketosteroid isomerase)]	HSD3B 3b-HSD	Sus scrofa (Pig)	SUBCELLULAR LOCATION: Endoplasmic reticulum membrane; Single-pass membrane protein. Mitochondrion membrane; Single-pass membrane protein.			Q9N119;
P13368	2.7.10.1	BINDING 2242 2242 ATP. {ECO:0000255|PROSITE-ProRule:PRU00159}.	Protein sevenless (EC 2.7.10.1)	sev HD-265 CG18085	Drosophila melanogaster (Fruit fly)	SUBCELLULAR LOCATION: Cell membrane {ECO:0000305}; Single-pass membrane protein {ECO:0000305}.			P13368;
P20806	2.7.10.1	BINDING 2257 2257 ATP. {ECO:0000255|PROSITE-ProRule:PRU00159}.	Protein sevenless (EC 2.7.10.1)	sev	Drosophila virilis (Fruit fly)	SUBCELLULAR LOCATION: Cell membrane {ECO:0000305}; Single-pass membrane protein {ECO:0000305}.			P20806;
Q3V1N9	2.4.1.87		Alpha-1,3-galactosyltransferase 2 (A3galt2) (EC 2.4.1.87) (Isoglobotriaosylceramide synthase) (iGb3 synthase) (iGb3S)	A3galt2 Igb3s	Mus musculus (Mouse)	SUBCELLULAR LOCATION: Golgi apparatus, Golgi stack membrane {ECO:0000305}; Single-pass type II membrane protein {ECO:0000305}. Note=Also found in numerous large vesicles throughout the cytoplasm of the soma. {ECO:0000250}.	COFACTOR: Name=Mn(2+); Xref=ChEBI:CHEBI:29035; Evidence={ECO:0000250};	METAL 229 229 Manganese. {ECO:0000250}.; METAL 231 231 Manganese. {ECO:0000250}.	Q3V1N9;
A0A4Z3	2.4.1.87		Alpha-1,3-galactosyltransferase 2 (A3galt2) (EC 2.4.1.87) (Isoglobotriaosylceramide synthase) (iGb3 synthase) (iGb3S)	A3galt2	Rattus norvegicus (Rat)	SUBCELLULAR LOCATION: Golgi apparatus, Golgi stack membrane {ECO:0000269|PubMed:17206613, ECO:0000269|PubMed:18630988}; Single-pass type II membrane protein {ECO:0000269|PubMed:17206613, ECO:0000269|PubMed:18630988}. Note=Also found in numerous large vesicles throughout the cytoplasm of the soma.	COFACTOR: Name=Mn(2+); Xref=ChEBI:CHEBI:29035; Evidence={ECO:0000250};	METAL 198 198 Manganese. {ECO:0000250}.; METAL 200 200 Manganese. {ECO:0000250}.	A0A4Z3;
Q9NPC4	2.4.1.228		Lactosylceramide 4-alpha-galactosyltransferase (EC 2.4.1.228) (Alpha-1,4-N-acetylglucosaminyltransferase) (Alpha-1,4-galactosyltransferase) (Alpha4Gal-T1) (CD77 synthase) (Globotriaosylceramide synthase) (Gb3 synthase) (P1/Pk synthase) (UDP-galactose:beta-D-galactosyl-beta1-R 4-alpha-D-galactosyltransferase)	A4GALT A14GALT A4GALT1	Homo sapiens (Human)	SUBCELLULAR LOCATION: Golgi apparatus membrane {ECO:0000305}; Single-pass type II membrane protein {ECO:0000305}.			Q9NPC4;
Q67BJ4	2.4.1.228		Lactosylceramide 4-alpha-galactosyltransferase (EC 2.4.1.228) (Alpha-1,4-N-acetylglucosaminyltransferase) (Alpha-1,4-galactosyltransferase) (Alpha4Gal-T1) (Globotriaosylceramide synthase) (Gb3 synthase) (UDP-galactose:beta-D-galactosyl-beta1-R 4-alpha-D-galactosyltransferase)	A4galt	Mus musculus (Mouse)	SUBCELLULAR LOCATION: Golgi apparatus membrane {ECO:0000250}; Single-pass type II membrane protein {ECO:0000250}.			Q67BJ4;
Q9N291	2.4.1.228		Lactosylceramide 4-alpha-galactosyltransferase (EC 2.4.1.228) (Alpha-1,4-N-acetylglucosaminyltransferase) (Alpha-1,4-galactosyltransferase) (Globotriaosylceramide synthase) (Gb3 synthase) (UDP-galactose:beta-D-galactosyl-beta1-R 4-alpha-D-galactosyltransferase)	A4GALT A14GALT A4GALT1	Pan troglodytes (Chimpanzee)	SUBCELLULAR LOCATION: Golgi apparatus membrane {ECO:0000305}; Single-pass type II membrane protein {ECO:0000305}.
Q9JI93	2.4.1.228		Lactosylceramide 4-alpha-galactosyltransferase (EC 2.4.1.228) (Alpha-1,4-N-acetylglucosaminyltransferase) (Alpha-1,4-galactosyltransferase) (Alpha4Gal-T1) (Globotriaosylceramide synthase) (Gb3 synthase) (UDP-galactose:beta-D-galactosyl-beta1-R 4-alpha-D-galactosyltransferase)	A4galt	Rattus norvegicus (Rat)	SUBCELLULAR LOCATION: Golgi apparatus membrane {ECO:0000250}; Single-pass type II membrane protein {ECO:0000250}.
Q9UNA3	2.4.1.-		Alpha-1,4-N-acetylglucosaminyltransferase (Alpha4GnT) (EC 2.4.1.-)	A4GNT	Homo sapiens (Human)	SUBCELLULAR LOCATION: Golgi apparatus membrane {ECO:0000305}; Single-pass type II membrane protein {ECO:0000305}.			Q9UNA3;
Q0P5B7	3.1.1.3		Arylacetamide deacetylase (EC 3.1.1.3)	AADAC	Bos taurus (Bovine)	SUBCELLULAR LOCATION: Endoplasmic reticulum membrane {ECO:0000250}; Single-pass type II membrane protein {ECO:0000250}. Microsome membrane {ECO:0000250}; Single-pass type II membrane protein {ECO:0000250}.			Q0P5B7;
P22760	3.1.1.3		Arylacetamide deacetylase (EC 3.1.1.3)	AADAC DAC	Homo sapiens (Human)	SUBCELLULAR LOCATION: Endoplasmic reticulum membrane; Single-pass type II membrane protein. Microsome membrane; Single-pass type II membrane protein.			P22760;
Q99PG0	3.1.1.3		Arylacetamide deacetylase (EC 3.1.1.3)	Aadac Aada	Mus musculus (Mouse)	SUBCELLULAR LOCATION: Endoplasmic reticulum membrane {ECO:0000269|PubMed:19654421}; Single-pass type II membrane protein {ECO:0000269|PubMed:19654421}. Microsome membrane {ECO:0000250}; Single-pass type II membrane protein {ECO:0000250}.			Q99PG0;
Q7M370	3.1.1.3		Arylacetamide deacetylase (EC 3.1.1.3) (50 kDa microsomal esterase/N-deacetylase)	AADAC	Oryctolagus cuniculus (Rabbit)	SUBCELLULAR LOCATION: Endoplasmic reticulum membrane; Single-pass type II membrane protein. Microsome membrane; Single-pass type II membrane protein.			Q7M370;
Q9QZH8	3.1.1.3		Arylacetamide deacetylase (EC 3.1.1.3)	Aadac Aada	Rattus norvegicus (Rat)	SUBCELLULAR LOCATION: Endoplasmic reticulum membrane {ECO:0000250}; Single-pass type II membrane protein {ECO:0000250}. Microsome membrane {ECO:0000250}; Single-pass type II membrane protein {ECO:0000250}.			Q9QZH8;
Q949P1	1.14.13.93		Abscisic acid 8'-hydroxylase 1 (ABA 8'-hydroxylase 1) (EC 1.14.13.93) (Cytochrome P450 707A1)	CYP707A1 At4g19230 T18B16.200	Arabidopsis thaliana (Mouse-ear cress)	SUBCELLULAR LOCATION: Membrane {ECO:0000305}; Single-pass membrane protein {ECO:0000305}.	COFACTOR: Name=heme; Xref=ChEBI:CHEBI:30413; Evidence={ECO:0000250};	METAL 411 411 Iron (heme axial ligand). {ECO:0000250}.	Q949P1;
Q09J79	1.14.13.93		Abscisic acid 8'-hydroxylase 1 (ABA 8'-hydroxylase 1) (EC 1.14.13.93) (Cytochrome P450 707A5) (OsABA8ox1)	CYP707A5 ABA8OX1 OsI_008437	Oryza sativa subsp. indica (Rice)	SUBCELLULAR LOCATION: Membrane {ECO:0000305}; Single-pass membrane protein {ECO:0000305}.	COFACTOR: Name=heme; Xref=ChEBI:CHEBI:30413; Evidence={ECO:0000250};	METAL 415 415 Iron (heme axial ligand). {ECO:0000250}.	Q09J79;
Q05JG2	1.14.13.93		Abscisic acid 8'-hydroxylase 1 (ABA 8'-hydroxylase 1) (EC 1.14.13.93) (Cytochrome P450 707A5) (OsABA8ox1)	CYP707A5 ABA8OX1 Os02g0703600 LOC_Os02g47470 OJ1218_D07.28 OsJ_007800 P0724B10.17	Oryza sativa subsp. japonica (Rice)	SUBCELLULAR LOCATION: Endoplasmic reticulum membrane {ECO:0000269|PubMed:17205969}; Single-pass membrane protein {ECO:0000269|PubMed:17205969}.	COFACTOR: Name=heme; Xref=ChEBI:CHEBI:30413; Evidence={ECO:0000250};	METAL 415 415 Iron (heme axial ligand). {ECO:0000250}.	Q05JG2;
O81077	1.14.13.93		Abscisic acid 8'-hydroxylase 2 (ABA 8'-hydroxylase 2) (EC 1.14.13.93) (Cytochrome P450 707A2)	CYP707A2 At2g29090 T9I4.17	Arabidopsis thaliana (Mouse-ear cress)	SUBCELLULAR LOCATION: Membrane {ECO:0000305}; Single-pass membrane protein {ECO:0000305}.	COFACTOR: Name=heme; Xref=ChEBI:CHEBI:30413; Evidence={ECO:0000250};	METAL 431 431 Iron (heme axial ligand). {ECO:0000250}.	O81077;
Q09J78	1.14.13.93		Abscisic acid 8'-hydroxylase 2 (ABA 8'-hydroxylase 2) (EC 1.14.13.93) (Cytochrome P450 707A6) (OsABA8ox2)	CYP707A6 ABA8OX2 OsI_028552	Oryza sativa subsp. indica (Rice)	SUBCELLULAR LOCATION: Membrane {ECO:0000305}; Single-pass membrane protein {ECO:0000305}.	COFACTOR: Name=heme; Xref=ChEBI:CHEBI:30413; Evidence={ECO:0000250};	METAL 437 437 Iron (heme axial ligand). {ECO:0000250}.	Q09J78;
Q6ZDE3	1.14.13.93		Abscisic acid 8'-hydroxylase 2 (ABA 8'-hydroxylase 2) (EC 1.14.13.93) (Cytochrome P450 707A6) (OsABA8ox2)	CYP707A6 ABA8OX2 Os08g0472800 LOC_Os08g36860 OsJ_026541 P0013B04.19	Oryza sativa subsp. japonica (Rice)	SUBCELLULAR LOCATION: Membrane {ECO:0000305}; Single-pass membrane protein {ECO:0000305}.	COFACTOR: Name=heme; Xref=ChEBI:CHEBI:30413; Evidence={ECO:0000250};	METAL 441 441 Iron (heme axial ligand). {ECO:0000250}.	Q6ZDE3;
Q9FH76	1.14.13.93		Abscisic acid 8'-hydroxylase 3 (ABA 8'-hydroxylase 3) (EC 1.14.13.93) (Cytochrome P450 707A3)	CYP707A3 At5g45340 K9E15.12	Arabidopsis thaliana (Mouse-ear cress)	SUBCELLULAR LOCATION: Membrane {ECO:0000305}; Single-pass membrane protein {ECO:0000305}.	COFACTOR: Name=heme; Xref=ChEBI:CHEBI:30413; Evidence={ECO:0000250};	METAL 411 411 Iron (heme axial ligand). {ECO:0000250}.	Q9FH76;
A2Z212	1.14.13.93		Abscisic acid 8'-hydroxylase 3 (ABA 8'-hydroxylase 3) (EC 1.14.13.93) (Cytochrome P450 707A7) (OsABA8ox3)	CYP707A7 ABA8OX3 OsI_030605	Oryza sativa subsp. indica (Rice)	SUBCELLULAR LOCATION: Membrane {ECO:0000305}; Single-pass membrane protein {ECO:0000305}.	COFACTOR: Name=heme; Xref=ChEBI:CHEBI:30413; Evidence={ECO:0000250};	METAL 426 426 Iron (heme axial ligand). {ECO:0000250}.	A2Z212;
Q0J185	1.14.13.93		Abscisic acid 8'-hydroxylase 3 (ABA 8'-hydroxylase 3) (EC 1.14.13.93) (Cytochrome P450 707A7) (OsABA8ox3)	CYP707A7 ABA8OX3 Os09g0457100 LOC_Os09g28390 B1342C04.43 OsJ_028469	Oryza sativa subsp. japonica (Rice)	SUBCELLULAR LOCATION: Membrane {ECO:0000305}; Single-pass membrane protein {ECO:0000305}.	COFACTOR: Name=heme; Xref=ChEBI:CHEBI:30413; Evidence={ECO:0000250};	METAL 426 426 Iron (heme axial ligand). {ECO:0000250}.	Q0J185;
Q9LJK2	1.14.13.93		Abscisic acid 8'-hydroxylase 4 (ABA 8'-hydroxylase 4) (EC 1.14.13.93) (Cytochrome P450 707A4)	CYP707A4 At3g19270 MVI11.19	Arabidopsis thaliana (Mouse-ear cress)	SUBCELLULAR LOCATION: Membrane {ECO:0000305}; Single-pass membrane protein {ECO:0000305}.	COFACTOR: Name=heme; Xref=ChEBI:CHEBI:30413; Evidence={ECO:0000250};	METAL 415 415 Iron (heme axial ligand). {ECO:0000250}.	Q9LJK2;
Q08DW9	3.1.1.23		Monoacylglycerol lipase ABHD12 (EC 3.1.1.23) (2-arachidonoylglycerol hydrolase) (Abhydrolase domain-containing protein 12)	ABHD12	Bos taurus (Bovine)	SUBCELLULAR LOCATION: Membrane {ECO:0000250}; Single-pass membrane protein {ECO:0000250}.			Q08DW9;
Q5ZIN0	3.1.1.23		Monoacylglycerol lipase ABHD12 (EC 3.1.1.23) (2-arachidonoylglycerol hydrolase) (Abhydrolase domain-containing protein 12)	ABHD12 RCJMB04_24m17	Gallus gallus (Chicken)	SUBCELLULAR LOCATION: Membrane {ECO:0000250}; Single-pass membrane protein {ECO:0000250}.			Q5ZIN0;
Q08C93	3.1.1.23		Monoacylglycerol lipase ABHD12 (EC 3.1.1.23) (Abhydrolase domain-containing protein 12)	abhd12 si:ch211-79l10.2 zgc:153367	Danio rerio (Zebrafish) (Brachydanio rerio)	SUBCELLULAR LOCATION: Membrane {ECO:0000250}; Single-pass membrane protein {ECO:0000250}.			Q08C93;
Q8N2K0	3.1.1.23		Monoacylglycerol lipase ABHD12 (EC 3.1.1.23) (2-arachidonoylglycerol hydrolase) (Abhydrolase domain-containing protein 12)	ABHD12 C20orf22	Homo sapiens (Human)	SUBCELLULAR LOCATION: Membrane {ECO:0000250}; Single-pass membrane protein {ECO:0000250}.			Q8N2K0;
Q4R766	3.1.1.23		Monoacylglycerol lipase ABHD12 (EC 3.1.1.23) (2-arachidonoylglycerol hydrolase) (Abhydrolase domain-containing protein 12)	ABHD12 QtsA-16132	Macaca fascicularis (Crab-eating macaque) (Cynomolgus monkey)	SUBCELLULAR LOCATION: Membrane {ECO:0000250}; Single-pass membrane protein {ECO:0000250}.			Q4R766;
Q99LR1	3.1.1.23		Monoacylglycerol lipase ABHD12 (EC 3.1.1.23) (2-arachidonoylglycerol hydrolase) (Abhydrolase domain-containing protein 12)	Abhd12	Mus musculus (Mouse)	SUBCELLULAR LOCATION: Membrane {ECO:0000269|PubMed:18096503}; Single-pass membrane protein {ECO:0000269|PubMed:18096503}.			Q99LR1;
Q6AYT7	3.1.1.23		Monoacylglycerol lipase ABHD12 (EC 3.1.1.23) (2-arachidonoylglycerol hydrolase) (Abhydrolase domain-containing protein 12)	Abhd12	Rattus norvegicus (Rat)	SUBCELLULAR LOCATION: Membrane {ECO:0000250}; Single-pass membrane protein {ECO:0000250}.			Q6AYT7;
B4F753	3.1.1.23		Monoacylglycerol lipase ABHD12 (EC 3.1.1.23) (Abhydrolase domain-containing protein 12)	abhd12	Xenopus tropicalis (Western clawed frog) (Silurana tropicalis)	SUBCELLULAR LOCATION: Membrane {ECO:0000250}; Single-pass membrane protein {ECO:0000250}.			B4F753;
Q802V6	3.1.1.-		Abhydrolase domain-containing protein 2-A (EC 3.1.1.-)	abhd2a abhd2 zgc:55722	Danio rerio (Zebrafish) (Brachydanio rerio)	SUBCELLULAR LOCATION: Membrane {ECO:0000305}; Single-pass type II membrane protein {ECO:0000305}.			Q802V6;
Q05AK6	3.1.1.-		Abhydrolase domain-containing protein 2-B (EC 3.1.1.-)	abhd2b zgc:153750	Danio rerio (Zebrafish) (Brachydanio rerio)	SUBCELLULAR LOCATION: Membrane {ECO:0000305}; Single-pass type II membrane protein {ECO:0000305}.			Q05AK6;
Q7SY73	3.1.1.23		Monoacylglycerol lipase abhd6-B (EC 3.1.1.23) (Abhydrolase domain-containing protein 6-B)	abhd6-b	Xenopus laevis (African clawed frog)	SUBCELLULAR LOCATION: Membrane {ECO:0000250}; Single-pass type II membrane protein {ECO:0000250}.			Q7SY73;
Q6GLL2	3.1.1.23		Monoacylglycerol lipase abhd6-A (EC 3.1.1.23) (Abhydrolase domain-containing protein 6-A)	abhd6-a	Xenopus laevis (African clawed frog)	SUBCELLULAR LOCATION: Membrane {ECO:0000250}; Single-pass type II membrane protein {ECO:0000250}.			Q6GLL2;
Q3T0A0	3.1.1.-		Abhydrolase domain-containing protein 1 (EC 3.1.1.-)	ABHD1	Bos taurus (Bovine)	SUBCELLULAR LOCATION: Membrane {ECO:0000305}; Single-pass type II membrane protein {ECO:0000305}.			Q3T0A0;
Q96SE0	3.1.1.-		Abhydrolase domain-containing protein 1 (EC 3.1.1.-) (Lung alpha/beta hydrolase 1)	ABHD1 LABH1	Homo sapiens (Human)	SUBCELLULAR LOCATION: Membrane {ECO:0000305}; Single-pass type II membrane protein {ECO:0000305}.			Q96SE0;
Q9QZC8	3.1.1.-		Abhydrolase domain-containing protein 1 (EC 3.1.1.-) (Lung alpha/beta hydrolase 1) (MmLABH1)	Abhd1 Labh1	Mus musculus (Mouse)	SUBCELLULAR LOCATION: Membrane {ECO:0000305}; Single-pass type II membrane protein {ECO:0000305}.			Q9QZC8;
Q5RK23	3.1.1.-		Abhydrolase domain-containing protein 1 (EC 3.1.1.-)	Abhd1	Rattus norvegicus (Rat)	SUBCELLULAR LOCATION: Membrane {ECO:0000305}; Single-pass type II membrane protein {ECO:0000305}.			Q5RK23;
Q5EA42	3.1.1.-		Abhydrolase domain-containing protein 2 (EC 3.1.1.-)	ABHD2	Bos taurus (Bovine)	SUBCELLULAR LOCATION: Membrane {ECO:0000305}; Single-pass type II membrane protein {ECO:0000305}.			Q5EA42;
Q24093	3.1.1.-		Abhydrolase domain-containing protein 2 (EC 3.1.1.-)	Hydr2 anon-23D anon-23Da CG3488	Drosophila melanogaster (Fruit fly)	SUBCELLULAR LOCATION: Membrane {ECO:0000305}; Single-pass type II membrane protein {ECO:0000305}.			Q24093;
P08910	3.1.1.-		Abhydrolase domain-containing protein 2 (EC 3.1.1.-) (Lung alpha/beta hydrolase 2) (Protein PHPS1-2)	ABHD2 LABH2	Homo sapiens (Human)	SUBCELLULAR LOCATION: Membrane {ECO:0000305}; Single-pass type II membrane protein {ECO:0000305}.			P08910;
Q4R2Y9	3.1.1.-		Abhydrolase domain-containing protein 2 (EC 3.1.1.-)	ABHD2 QtsA-14549 QtsA-21018	Macaca fascicularis (Crab-eating macaque) (Cynomolgus monkey)	SUBCELLULAR LOCATION: Membrane {ECO:0000305}; Single-pass type II membrane protein {ECO:0000305}.			Q4R2Y9;
Q9QXM0	3.1.1.-		Abhydrolase domain-containing protein 2 (EC 3.1.1.-) (Lung alpha/beta hydrolase 2) (MmLABH2)	Abhd2 Labh-2 Labh2	Mus musculus (Mouse)	SUBCELLULAR LOCATION: Membrane {ECO:0000305}; Single-pass type II membrane protein {ECO:0000305}.			Q9QXM0;
Q0VC00	3.1.1.-		Abhydrolase domain-containing protein 3 (EC 3.1.1.-)	ABHD3	Bos taurus (Bovine)	SUBCELLULAR LOCATION: Membrane {ECO:0000305}; Single-pass type II membrane protein {ECO:0000305}.			Q0VC00;
Q8WU67	3.1.1.-		Abhydrolase domain-containing protein 3 (EC 3.1.1.-) (Lung alpha/beta hydrolase 3)	ABHD3 LABH3	Homo sapiens (Human)	SUBCELLULAR LOCATION: Membrane {ECO:0000305}; Single-pass type II membrane protein {ECO:0000305}.			Q8WU67;
Q91ZH7	3.1.1.-		Abhydrolase domain-containing protein 3 (EC 3.1.1.-) (Lung alpha/beta hydrolase 3) (MmLABH3)	Abhd3 Labh3	Mus musculus (Mouse)	SUBCELLULAR LOCATION: Membrane {ECO:0000305}; Single-pass type II membrane protein {ECO:0000305}.			Q91ZH7;
Q1LZ86	3.1.1.23		Monoacylglycerol lipase ABHD6 (EC 3.1.1.23) (2-arachidonoylglycerol hydrolase) (Abhydrolase domain-containing protein 6)	ABHD6	Bos taurus (Bovine)	SUBCELLULAR LOCATION: Membrane {ECO:0000250}; Single-pass type II membrane protein {ECO:0000250}.			Q1LZ86;
Q9BV23	3.1.1.23		Monoacylglycerol lipase ABHD6 (EC 3.1.1.23) (2-arachidonoylglycerol hydrolase) (Abhydrolase domain-containing protein 6)	ABHD6	Homo sapiens (Human)	SUBCELLULAR LOCATION: Membrane {ECO:0000250}; Single-pass type II membrane protein {ECO:0000250}.			Q9BV23;
Q8R2Y0	3.1.1.23		Monoacylglycerol lipase ABHD6 (EC 3.1.1.23) (2-arachidonoylglycerol hydrolase) (Abhydrolase domain-containing protein 6)	Abhd6	Mus musculus (Mouse)	SUBCELLULAR LOCATION: Membrane {ECO:0000269|PubMed:18096503}; Single-pass type II membrane protein {ECO:0000269|PubMed:18096503}.			Q8R2Y0;
Q5XI64	3.1.1.23		Monoacylglycerol lipase ABHD6 (EC 3.1.1.23) (2-arachidonoylglycerol hydrolase) (Abhydrolase domain-containing protein 6)	Abhd6	Rattus norvegicus (Rat)	SUBCELLULAR LOCATION: Membrane {ECO:0000250}; Single-pass type II membrane protein {ECO:0000250}.			Q5XI64;
Q5ZJL8	3.-.-.-		Alpha/beta hydrolase domain-containing protein 13 (Abhydrolase domain-containing protein 13) (EC 3.-.-.-)	ABHD13 RCJMB04_17d11	Gallus gallus (Chicken)	SUBCELLULAR LOCATION: Membrane {ECO:0000305}; Single-pass type II membrane protein {ECO:0000305}.			Q5ZJL8;
Q32LS6	3.-.-.-		Alpha/beta hydrolase domain-containing protein 13 (Abhydrolase domain-containing protein 13) (EC 3.-.-.-)	abhd13 zgc:123286	Danio rerio (Zebrafish) (Brachydanio rerio)	SUBCELLULAR LOCATION: Membrane {ECO:0000305}; Single-pass type II membrane protein {ECO:0000305}.			Q32LS6;
Q7L211	3.-.-.-		Alpha/beta hydrolase domain-containing protein 13 (Abhydrolase domain-containing protein 13) (EC 3.-.-.-)	ABHD13 C13orf6	Homo sapiens (Human)	SUBCELLULAR LOCATION: Membrane {ECO:0000305}; Single-pass type II membrane protein {ECO:0000305}.			Q7L211;
Q80UX8	3.-.-.-		Alpha/beta hydrolase domain-containing protein 13 (Abhydrolase domain-containing protein 13) (EC 3.-.-.-)	Abhd13	Mus musculus (Mouse)	SUBCELLULAR LOCATION: Membrane {ECO:0000305}; Single-pass type II membrane protein {ECO:0000305}.			Q80UX8;
Q6IRP4	3.-.-.-		Alpha/beta hydrolase domain-containing protein 13 (Abhydrolase domain-containing protein 13) (EC 3.-.-.-)	abhd13	Xenopus laevis (African clawed frog)	SUBCELLULAR LOCATION: Membrane {ECO:0000305}; Single-pass type II membrane protein {ECO:0000305}.			Q6IRP4;
Q1LV46	3.-.-.-		Alpha/beta hydrolase domain-containing protein 14A (Abhydrolase domain-containing protein 14A) (EC 3.-.-.-)	abhd14a si:ch211-231a1.1 zgc:85972	Danio rerio (Zebrafish) (Brachydanio rerio)	SUBCELLULAR LOCATION: Cytoplasm {ECO:0000250}. Membrane {ECO:0000305}; Single-pass type II membrane protein {ECO:0000305}.			Q1LV46;
Q9BUJ0	3.-.-.-		Alpha/beta hydrolase domain-containing protein 14A (Abhydrolase domain-containing protein 14A) (EC 3.-.-.-)	ABHD14A UNQ1913/PRO4373	Homo sapiens (Human)	SUBCELLULAR LOCATION: Cytoplasm {ECO:0000250}. Membrane {ECO:0000305}; Single-pass type II membrane protein {ECO:0000305}.			Q9BUJ0;
Q922Q6	3.-.-.-		Alpha/beta hydrolase domain-containing protein 14A (Abhydrolase domain-containing protein 14A) (EC 3.-.-.-) (Down-regulated in Zic-1-mutant protein)	Abhd14a Dorz1	Mus musculus (Mouse)	SUBCELLULAR LOCATION: Cytoplasm {ECO:0000269|PubMed:14667578}. Membrane {ECO:0000305}; Single-pass type II membrane protein {ECO:0000305}.			Q922Q6;
Q5I0C4	3.-.-.-		Alpha/beta hydrolase domain-containing protein 14A (Abhydrolase domain-containing protein 14A) (EC 3.-.-.-)	Abhd14a	Rattus norvegicus (Rat)	SUBCELLULAR LOCATION: Cytoplasm {ECO:0000250}. Membrane {ECO:0000305}; Single-pass type II membrane protein {ECO:0000305}.			Q5I0C4;
Q54P00	2.7.11.-	BINDING 345 345 ATP. {ECO:0000250}.	Probable serine/threonine-protein kinase abkD (EC 2.7.11.-)	abkD adckB2 DDB_G0284897	Dictyostelium discoideum (Slime mold)	SUBCELLULAR LOCATION: Membrane {ECO:0000305}; Single-pass membrane protein {ECO:0000305}.
Q2R712	5.4.99.48		Achilleol B synthase (EC 5.4.99.48)	Os11g0285000 LOC_Os11g18194	Oryza sativa subsp. japonica (Rice)	SUBCELLULAR LOCATION: Membrane {ECO:0000305}; Single-pass membrane protein {ECO:0000305}.
Q9S7D9	2.7.11.1	BINDING 548 548 ATP. {ECO:0000255|PROSITE-ProRule:PRU00159}.	Serine/threonine-protein kinase-like protein CCR1 (EC 2.7.11.1) (Protein CRINKLY 4 RELATED 1) (AtCRR1)	CCR1 CRR1 At3g09780 F11F8.37 F8A24.17	Arabidopsis thaliana (Mouse-ear cress)	SUBCELLULAR LOCATION: Membrane {ECO:0000305}; Single-pass type I membrane protein {ECO:0000305}.			Q9S7D9;
O80963	2.7.11.1	BINDING 547 547 ATP. {ECO:0000255|PROSITE-ProRule:PRU00159}.	Serine/threonine-protein kinase-like protein CCR2 (EC 2.7.11.1) (Protein CRINKLY 4 RELATED 2) (AtCRR2)	CCR2 CRR2 At2g39180 T16B24.18	Arabidopsis thaliana (Mouse-ear cress)	SUBCELLULAR LOCATION: Membrane {ECO:0000305}; Single-pass type I membrane protein {ECO:0000305}.			O80963;
Q9LY50	2.7.11.1	BINDING 524 524 ATP. {ECO:0000255|PROSITE-ProRule:PRU00159}.	Putative serine/threonine-protein kinase-like protein CCR3 (EC 2.7.11.1) (Protein CRINKLY 4 RELATED 3) (AtCRR3)	CCR3 CRR3 At3g55950 F27K19.130	Arabidopsis thaliana (Mouse-ear cress)	SUBCELLULAR LOCATION: Membrane {ECO:0000305}; Single-pass type I membrane protein {ECO:0000305}.			Q9LY50;
Q9FIJ6	2.7.11.1	BINDING 471 471 ATP. {ECO:0000255|PROSITE-ProRule:PRU00159}.	Serine/threonine-protein kinase-like protein CCR4 (EC 2.7.11.1) (CRINKLY 4-related kinase 1) (AtCRK1) (Protein CRINKLY 4 RELATED 4) (AtCCR4)	CCR4 CRK1 At5g47850 MCA23.19	Arabidopsis thaliana (Mouse-ear cress)	SUBCELLULAR LOCATION: Membrane {ECO:0000305}; Single-pass type I membrane protein {ECO:0000305}.			Q9FIJ6;
Q58DD0	3.4.17.23	BINDING 168 168 Chloride. {ECO:0000250}.; BINDING 272 272 Substrate. {ECO:0000250}.; BINDING 344 344 Substrate. {ECO:0000250}.; BINDING 345 345 Substrate; via carbonyl oxygen. {ECO:0000250}.; BINDING 370 370 Substrate. {ECO:0000250}.; BINDING 476 476 Chloride. {ECO:0000250}.; BINDING 480 480 Chloride. {ECO:0000250}.; BINDING 514 514 Substrate. {ECO:0000250}.	Angiotensin-converting enzyme 2 (EC 3.4.17.23) (ACE-related carboxypeptidase) [Cleaved into: Processed angiotensin-converting enzyme 2]	ACE2	Bos taurus (Bovine)	SUBCELLULAR LOCATION: Processed angiotensin-converting enzyme 2: Secreted {ECO:0000250}.; SUBCELLULAR LOCATION: Cell membrane {ECO:0000250}; Single-pass type I membrane protein {ECO:0000250}. Cytoplasm {ECO:0000250}. Note=Detected in both cell membrane and cytoplasm in neurons. {ECO:0000250}.	COFACTOR: Name=Zn(2+); Xref=ChEBI:CHEBI:29105; Evidence={ECO:0000250}; ; Note=Binds 1 zinc ion per subunit. {ECO:0000250};; COFACTOR: Name=chloride; Xref=ChEBI:CHEBI:17996; Evidence={ECO:0000250}; ; Note=Binds 1 Cl(-) ion per subunit. {ECO:0000250};	METAL 373 373 Zinc; catalytic. {ECO:0000255|PROSITE-ProRule:PRU10095}.; METAL 377 377 Zinc; catalytic. {ECO:0000255|PROSITE-ProRule:PRU10095}.; METAL 401 401 Zinc; catalytic. {ECO:0000255|PROSITE-ProRule:PRU10095}.	Q58DD0;
Q56H28	3.4.17.23	BINDING 169 169 Chloride. {ECO:0000250}.; BINDING 273 273 Substrate. {ECO:0000250}.; BINDING 345 345 Substrate. {ECO:0000250}.; BINDING 346 346 Substrate; via carbonyl oxygen. {ECO:0000250}.; BINDING 371 371 Substrate. {ECO:0000250}.; BINDING 477 477 Chloride. {ECO:0000250}.; BINDING 481 481 Chloride. {ECO:0000250}.; BINDING 515 515 Substrate. {ECO:0000250}.	Angiotensin-converting enzyme 2 (EC 3.4.17.23) (ACE-related carboxypeptidase) [Cleaved into: Processed angiotensin-converting enzyme 2]	ACE2	Felis catus (Cat) (Felis silvestris catus)	SUBCELLULAR LOCATION: Processed angiotensin-converting enzyme 2: Secreted {ECO:0000250}.; SUBCELLULAR LOCATION: Cell membrane {ECO:0000250}; Single-pass type I membrane protein {ECO:0000250}. Cytoplasm {ECO:0000250}. Note=Detected in both cell membrane and cytoplasm in neurons. {ECO:0000250}.	COFACTOR: Name=Zn(2+); Xref=ChEBI:CHEBI:29105; Evidence={ECO:0000250}; ; Note=Binds 1 zinc ion per subunit. {ECO:0000250};; COFACTOR: Name=chloride; Xref=ChEBI:CHEBI:17996; Evidence={ECO:0000250}; ; Note=Binds 1 Cl(-) ion per subunit. {ECO:0000250};	METAL 374 374 Zinc; catalytic. {ECO:0000255|PROSITE-ProRule:PRU10095}.; METAL 378 378 Zinc; catalytic. {ECO:0000255|PROSITE-ProRule:PRU10095}.; METAL 402 402 Zinc; catalytic. {ECO:0000255|PROSITE-ProRule:PRU10095}.	Q56H28;
Q9BYF1	3.4.17.23	BINDING 169 169 Chloride.; BINDING 273 273 Substrate.; BINDING 345 345 Substrate.; BINDING 346 346 Substrate; via carbonyl oxygen.; BINDING 371 371 Substrate.; BINDING 477 477 Chloride.; BINDING 481 481 Chloride.; BINDING 515 515 Substrate.	Angiotensin-converting enzyme 2 (EC 3.4.17.23) (ACE-related carboxypeptidase) (Angiotensin-converting enzyme homolog) (ACEH) (Metalloprotease MPROT15) [Cleaved into: Processed angiotensin-converting enzyme 2]	ACE2 UNQ868/PRO1885	Homo sapiens (Human)	SUBCELLULAR LOCATION: Processed angiotensin-converting enzyme 2: Secreted.; SUBCELLULAR LOCATION: Cell membrane; Single-pass type I membrane protein. Cytoplasm {ECO:0000250}. Note=Detected in both cell membrane and cytoplasm in neurons. {ECO:0000250}.	COFACTOR: Name=Zn(2+); Xref=ChEBI:CHEBI:29105; Evidence={ECO:0000269|PubMed:11815627}; ; Note=Binds 1 zinc ion per subunit. {ECO:0000269|PubMed:11815627};; COFACTOR: Name=chloride; Xref=ChEBI:CHEBI:17996; Evidence={ECO:0000269|PubMed:11815627}; ; Note=Binds 1 Cl(-) ion per subunit. {ECO:0000269|PubMed:11815627};	METAL 374 374 Zinc; catalytic.; METAL 378 378 Zinc; catalytic.; METAL 402 402 Zinc; catalytic.	Q9BYF1;
Q8R0I0	3.4.17.23	BINDING 169 169 Chloride. {ECO:0000250}.; BINDING 273 273 Substrate. {ECO:0000250}.; BINDING 345 345 Substrate. {ECO:0000250}.; BINDING 346 346 Substrate; via carbonyl oxygen. {ECO:0000250}.; BINDING 371 371 Substrate. {ECO:0000250}.; BINDING 477 477 Chloride. {ECO:0000250}.; BINDING 481 481 Chloride. {ECO:0000250}.; BINDING 515 515 Substrate. {ECO:0000250}.	Angiotensin-converting enzyme 2 (EC 3.4.17.23) (ACE-related carboxypeptidase) [Cleaved into: Processed angiotensin-converting enzyme 2]	Ace2	Mus musculus (Mouse)	SUBCELLULAR LOCATION: Processed angiotensin-converting enzyme 2: Secreted {ECO:0000250}.; SUBCELLULAR LOCATION: Cell membrane {ECO:0000269|PubMed:23535237}; Single-pass type I membrane protein {ECO:0000269|PubMed:23535237}. Cytoplasm {ECO:0000269|PubMed:23535237}. Note=Detected in both cell membrane and cytoplasm in neurons.	COFACTOR: Name=Zn(2+); Xref=ChEBI:CHEBI:29105; Evidence={ECO:0000250}; ; Note=Binds 1 zinc ion per subunit. {ECO:0000250};; COFACTOR: Name=chloride; Xref=ChEBI:CHEBI:17996; Evidence={ECO:0000250}; ; Note=Binds 1 Cl(-) ion per subunit. {ECO:0000250};	METAL 374 374 Zinc; catalytic. {ECO:0000255|PROSITE-ProRule:PRU10095}.; METAL 378 378 Zinc; catalytic. {ECO:0000255|PROSITE-ProRule:PRU10095}.; METAL 402 402 Zinc; catalytic. {ECO:0000255|PROSITE-ProRule:PRU10095}.	Q8R0I0;
Q56NL1	3.4.17.23	BINDING 169 169 Chloride. {ECO:0000250}.; BINDING 273 273 Substrate. {ECO:0000250}.; BINDING 345 345 Substrate. {ECO:0000250}.; BINDING 346 346 Substrate; via carbonyl oxygen. {ECO:0000250}.; BINDING 371 371 Substrate. {ECO:0000250}.; BINDING 477 477 Chloride. {ECO:0000250}.; BINDING 481 481 Chloride. {ECO:0000250}.; BINDING 515 515 Substrate. {ECO:0000250}.	Angiotensin-converting enzyme 2 (EC 3.4.17.23) (ACE-related carboxypeptidase) [Cleaved into: Processed angiotensin-converting enzyme 2]	ACE2	Paguma larvata (Masked palm civet)	SUBCELLULAR LOCATION: Processed angiotensin-converting enzyme 2: Secreted {ECO:0000250}.; SUBCELLULAR LOCATION: Cell membrane {ECO:0000250}; Single-pass type I membrane protein {ECO:0000250}. Cytoplasm {ECO:0000250}. Note=Detected in both cell membrane and cytoplasm in neurons. {ECO:0000250}.	COFACTOR: Name=Zn(2+); Xref=ChEBI:CHEBI:29105; ; Note=Binds 1 zinc ion per subunit.;; COFACTOR: Name=chloride; Xref=ChEBI:CHEBI:17996; ; Note=Binds 1 Cl(-) ion per subunit.;	METAL 374 374 Zinc; catalytic.; METAL 378 378 Zinc; catalytic.; METAL 402 402 Zinc; catalytic.	Q56NL1;
Q5RFN1	3.4.17.23	BINDING 169 169 Chloride. {ECO:0000250}.; BINDING 273 273 Substrate. {ECO:0000250}.; BINDING 345 345 Substrate. {ECO:0000250}.; BINDING 346 346 Substrate; via carbonyl oxygen. {ECO:0000250}.; BINDING 371 371 Substrate. {ECO:0000250}.; BINDING 477 477 Chloride. {ECO:0000250}.; BINDING 481 481 Chloride. {ECO:0000250}.; BINDING 515 515 Substrate. {ECO:0000250}.	Angiotensin-converting enzyme 2 (EC 3.4.17.23) (ACE-related carboxypeptidase) [Cleaved into: Processed angiotensin-converting enzyme 2]	ACE2	Pongo abelii (Sumatran orangutan) (Pongo pygmaeus abelii)	SUBCELLULAR LOCATION: Processed angiotensin-converting enzyme 2: Secreted {ECO:0000250}.; SUBCELLULAR LOCATION: Cell membrane {ECO:0000250}; Single-pass type I membrane protein {ECO:0000250}. Cytoplasm {ECO:0000250}. Note=Detected in both cell membrane and cytoplasm in neurons. {ECO:0000250}.	COFACTOR: Name=Zn(2+); Xref=ChEBI:CHEBI:29105; Evidence={ECO:0000250}; ; Note=Binds 1 zinc ion per subunit. {ECO:0000250};; COFACTOR: Name=chloride; Xref=ChEBI:CHEBI:17996; Evidence={ECO:0000250}; ; Note=Binds 1 Cl(-) ion per subunit. {ECO:0000250};	METAL 374 374 Zinc; catalytic. {ECO:0000255|PROSITE-ProRule:PRU10095}.; METAL 378 378 Zinc; catalytic. {ECO:0000255|PROSITE-ProRule:PRU10095}.; METAL 402 402 Zinc; catalytic. {ECO:0000255|PROSITE-ProRule:PRU10095}.	Q5RFN1;
Q5EGZ1	3.4.17.23	BINDING 169 169 Chloride. {ECO:0000250}.; BINDING 273 273 Substrate. {ECO:0000250}.; BINDING 345 345 Substrate. {ECO:0000250}.; BINDING 346 346 Substrate; via carbonyl oxygen. {ECO:0000250}.; BINDING 371 371 Substrate. {ECO:0000250}.; BINDING 477 477 Chloride. {ECO:0000250}.; BINDING 481 481 Chloride. {ECO:0000250}.; BINDING 515 515 Substrate. {ECO:0000250}.	Angiotensin-converting enzyme 2 (EC 3.4.17.23) (ACE-related carboxypeptidase) [Cleaved into: Processed angiotensin-converting enzyme 2]	Ace2	Rattus norvegicus (Rat)	SUBCELLULAR LOCATION: Processed angiotensin-converting enzyme 2: Secreted {ECO:0000250}.; SUBCELLULAR LOCATION: Cell membrane {ECO:0000250}; Single-pass type I membrane protein {ECO:0000250}. Cytoplasm {ECO:0000250}. Note=Detected in both cell membrane and cytoplasm in neurons. {ECO:0000250}.	COFACTOR: Name=Zn(2+); Xref=ChEBI:CHEBI:29105; Evidence={ECO:0000250}; ; Note=Binds 1 zinc ion per subunit. {ECO:0000250};; COFACTOR: Name=chloride; Xref=ChEBI:CHEBI:17996; Evidence={ECO:0000250}; ; Note=Binds 1 Cl(-) ion per subunit. {ECO:0000250};	METAL 374 374 Zinc; catalytic. {ECO:0000255|PROSITE-ProRule:PRU10095}.; METAL 378 378 Zinc; catalytic. {ECO:0000255|PROSITE-ProRule:PRU10095}.; METAL 402 402 Zinc; catalytic. {ECO:0000255|PROSITE-ProRule:PRU10095}.	Q5EGZ1;
Q10751	3.2.1.-; 3.4.15.1		Angiotensin-converting enzyme (ACE) (EC 3.2.1.-) (EC 3.4.15.1) (Dipeptidyl carboxypeptidase I) (Kininase II) (Fragment)	ACE DCP1	Gallus gallus (Chicken)	SUBCELLULAR LOCATION: Membrane; Single-pass type I membrane protein.	COFACTOR: Name=Zn(2+); Xref=ChEBI:CHEBI:29105; Evidence={ECO:0000250}; ; Note=Binds 2 Zn(2+) ions per subunit. {ECO:0000250};	METAL 288 288 Zinc 1; catalytic. {ECO:0000250}.; METAL 292 292 Zinc 1; catalytic. {ECO:0000250}.; METAL 886 886 Zinc 2; catalytic. {ECO:0000250}.; METAL 890 890 Zinc 2; catalytic. {ECO:0000250}.	Q10751;
P12821	3.2.1.-; 3.4.15.1	BINDING 231 231 Chloride 1.; BINDING 529 529 Chloride 1.; BINDING 791 791 Chloride 2.; BINDING 829 829 Chloride 3.; BINDING 1090 1090 Chloride 2.; BINDING 1094 1094 Chloride 2.; BINDING 1127 1127 Chloride 3.	Angiotensin-converting enzyme (ACE) (EC 3.2.1.-) (EC 3.4.15.1) (Dipeptidyl carboxypeptidase I) (Kininase II) (CD antigen CD143) [Cleaved into: Angiotensin-converting enzyme, soluble form]	ACE DCP DCP1	Homo sapiens (Human)	SUBCELLULAR LOCATION: Angiotensin-converting enzyme, soluble form: Secreted.; SUBCELLULAR LOCATION: Cell membrane; Single-pass type I membrane protein. Cytoplasm {ECO:0000250}. Note=Detected in both cell membrane and cytoplasm in neurons. {ECO:0000250}.	COFACTOR: Name=Zn(2+); Xref=ChEBI:CHEBI:29105; ; Note=Binds 2 Zn(2+) ions per subunit.;; COFACTOR: Isoform Testis-specific: Name=Zn(2+); Xref=ChEBI:CHEBI:29105; ; Note=Isoform Testis-specific only binds 1 Zn(2+) ion per subunit.;; COFACTOR: Name=chloride; Xref=ChEBI:CHEBI:17996; ; Note=Binds 3 chloride ions per subunit.;	METAL 390 390 Zinc 1; catalytic. {ECO:0000269|PubMed:16476442}.; METAL 394 394 Zinc 1; catalytic. {ECO:0000269|PubMed:16476442}.; METAL 418 418 Zinc 1; catalytic. {ECO:0000269|PubMed:16476442}.; METAL 988 988 Zinc 2; catalytic. {ECO:0000269|PubMed:16476442}.; METAL 992 992 Zinc 2; catalytic. {ECO:0000269|PubMed:16476442}.; METAL 1016 1016 Zinc 2; catalytic. {ECO:0000269|PubMed:16476442}.	P12821;
Q50JE5	3.2.1.-; 3.4.15.1	BINDING 237 237 Chloride 1. {ECO:0000250}.; BINDING 535 535 Chloride 1. {ECO:0000250}.; BINDING 797 797 Chloride 2. {ECO:0000250}.; BINDING 835 835 Chloride 3. {ECO:0000250}.; BINDING 1096 1096 Chloride 2. {ECO:0000250}.; BINDING 1100 1100 Chloride 2. {ECO:0000250}.; BINDING 1133 1133 Chloride 3. {ECO:0000250}.	Angiotensin-converting enzyme (ACE) (EC 3.2.1.-) (EC 3.4.15.1) (Dipeptidyl carboxypeptidase I) (Kininase II) (CD antigen CD143) [Cleaved into: Angiotensin-converting enzyme, soluble form]	Ace Dcp1	Mesocricetus auratus (Golden hamster)	SUBCELLULAR LOCATION: Angiotensin-converting enzyme, soluble form: Secreted {ECO:0000250}.; SUBCELLULAR LOCATION: Cell membrane {ECO:0000250}; Single-pass type I membrane protein {ECO:0000250}. Cytoplasm {ECO:0000250}. Note=Detected in both cell membrane and cytoplasm in neurons. {ECO:0000250}.	COFACTOR: Name=Zn(2+); Xref=ChEBI:CHEBI:29105; Evidence={ECO:0000250}; ; Note=Binds 2 Zn(2+) ions per subunit. {ECO:0000250};; COFACTOR: Name=chloride; Xref=ChEBI:CHEBI:17996; Evidence={ECO:0000250}; ; Note=Binds 3 chloride ions per subunit. {ECO:0000250};	METAL 396 396 Zinc 1; catalytic. {ECO:0000250}.; METAL 400 400 Zinc 1; catalytic. {ECO:0000250}.; METAL 424 424 Zinc 1; catalytic. {ECO:0000250}.; METAL 994 994 Zinc 2; catalytic. {ECO:0000250}.; METAL 998 998 Zinc 2; catalytic. {ECO:0000250}.; METAL 1022 1022 Zinc 2; catalytic. {ECO:0000250}.	Q50JE5;
P09470	3.2.1.-; 3.4.15.1	BINDING 236 236 Chloride 1. {ECO:0000250}.; BINDING 534 534 Chloride 1. {ECO:0000250}.; BINDING 796 796 Chloride 2. {ECO:0000250}.; BINDING 834 834 Chloride 3. {ECO:0000250}.; BINDING 1095 1095 Chloride 2. {ECO:0000250}.; BINDING 1099 1099 Chloride 2. {ECO:0000250}.; BINDING 1132 1132 Chloride 3. {ECO:0000250}.	Angiotensin-converting enzyme (ACE) (EC 3.2.1.-) (EC 3.4.15.1) (Dipeptidyl carboxypeptidase I) (Kininase II) (CD antigen CD143) [Cleaved into: Angiotensin-converting enzyme, soluble form]	Ace Dcp1	Mus musculus (Mouse)	SUBCELLULAR LOCATION: Angiotensin-converting enzyme, soluble form: Secreted {ECO:0000250}.; SUBCELLULAR LOCATION: Cell membrane {ECO:0000269|PubMed:23535237}; Single-pass type I membrane protein {ECO:0000269|PubMed:23535237}. Cytoplasm {ECO:0000269|PubMed:23535237}. Note=Detected in both cell membrane and cytoplasm in neurons.	COFACTOR: Name=Zn(2+); Xref=ChEBI:CHEBI:29105; Evidence={ECO:0000250}; ; Note=Binds 2 Zn(2+) ions per subunit. Isoform Testis-specific only binds 1 Zn(2+) ion per subunit. {ECO:0000250};; COFACTOR: Name=chloride; Xref=ChEBI:CHEBI:17996; Evidence={ECO:0000250}; ; Note=Binds 3 chloride ions per subunit. {ECO:0000250};	METAL 395 395 Zinc 1; catalytic. {ECO:0000250}.; METAL 399 399 Zinc 1; catalytic. {ECO:0000250}.; METAL 423 423 Zinc 1; catalytic. {ECO:0000250}.; METAL 993 993 Zinc 2; catalytic.; METAL 997 997 Zinc 2; catalytic.; METAL 1021 1021 Zinc 2; catalytic. {ECO:0000250}.	P09470;
Q9GLN7	3.2.1.-; 3.4.15.1	BINDING 229 229 Chloride 1. {ECO:0000250}.; BINDING 527 527 Chloride 1. {ECO:0000250}.; BINDING 789 789 Chloride 2. {ECO:0000250}.; BINDING 827 827 Chloride 3. {ECO:0000250}.; BINDING 1088 1088 Chloride 2. {ECO:0000250}.; BINDING 1092 1092 Chloride 2. {ECO:0000250}.; BINDING 1125 1125 Chloride 3. {ECO:0000250}.	Angiotensin-converting enzyme (ACE) (EC 3.2.1.-) (EC 3.4.15.1) (Dipeptidyl carboxypeptidase I) (Kininase II) (CD antigen CD143) [Cleaved into: Angiotensin-converting enzyme, soluble form]	ACE DCP1	Pan troglodytes (Chimpanzee)	SUBCELLULAR LOCATION: Angiotensin-converting enzyme, soluble form: Secreted {ECO:0000250}.; SUBCELLULAR LOCATION: Cell membrane {ECO:0000250}; Single-pass type I membrane protein {ECO:0000250}. Cytoplasm {ECO:0000250}. Note=Detected in both cell membrane and cytoplasm in neurons. {ECO:0000250}.	COFACTOR: Name=Zn(2+); Xref=ChEBI:CHEBI:29105; Evidence={ECO:0000250}; ; Note=Binds 2 Zn(2+) ions per subunit. Isoform Testis-specific only binds 1 Zn(2+) ion per subunit. {ECO:0000250};; COFACTOR: Name=chloride; Xref=ChEBI:CHEBI:17996; Evidence={ECO:0000250}; ; Note=Binds 3 chloride ions per subunit. {ECO:0000250};	METAL 388 388 Zinc 1; catalytic. {ECO:0000250}.; METAL 392 392 Zinc 1; catalytic. {ECO:0000250}.; METAL 416 416 Zinc 1; catalytic. {ECO:0000250}.; METAL 986 986 Zinc 2; catalytic. {ECO:0000250}.; METAL 990 990 Zinc 2; catalytic. {ECO:0000250}.; METAL 1014 1014 Zinc 2; catalytic. {ECO:0000250}.	Q9GLN7;
P12822	3.2.1.-; 3.4.15.1	BINDING 236 236 Chloride 1. {ECO:0000250}.; BINDING 533 533 Chloride 1. {ECO:0000250}.; BINDING 795 795 Chloride 2. {ECO:0000250}.; BINDING 833 833 Chloride 3. {ECO:0000250}.; BINDING 1094 1094 Chloride 2. {ECO:0000250}.; BINDING 1098 1098 Chloride 2. {ECO:0000250}.; BINDING 1131 1131 Chloride 3. {ECO:0000250}.	Angiotensin-converting enzyme (ACE) (EC 3.2.1.-) (EC 3.4.15.1) (Dipeptidyl carboxypeptidase I) (Kininase II) (CD antigen CD143) [Cleaved into: Angiotensin-converting enzyme, soluble form]	ACE DCP1	Oryctolagus cuniculus (Rabbit)	SUBCELLULAR LOCATION: Angiotensin-converting enzyme, soluble form: Secreted {ECO:0000250}.; SUBCELLULAR LOCATION: Cell membrane {ECO:0000250}; Single-pass type I membrane protein {ECO:0000250}. Cytoplasm {ECO:0000250}. Note=Detected in both cell membrane and cytoplasm in neurons. {ECO:0000250}.	COFACTOR: Name=Zn(2+); Xref=ChEBI:CHEBI:29105; Evidence={ECO:0000250}; ; Note=Binds 2 Zn(2+) ions per subunit. Isoform Testis-specific only binds 1 Zn(2+) ion per subunit. {ECO:0000250};; COFACTOR: Name=chloride; Xref=ChEBI:CHEBI:17996; Evidence={ECO:0000250}; ; Note=Binds 3 chloride ions per subunit. {ECO:0000250};	METAL 395 395 Zinc 1; catalytic. {ECO:0000250}.; METAL 399 399 Zinc 1; catalytic. {ECO:0000250}.; METAL 422 422 Zinc 1; catalytic. {ECO:0000250}.; METAL 992 992 Zinc 2; catalytic. {ECO:0000250}.; METAL 996 996 Zinc 2; catalytic. {ECO:0000250}.; METAL 1020 1020 Zinc 2; catalytic. {ECO:0000250}.	P12822;
P47820	3.2.1.-; 3.4.15.1	BINDING 237 237 Chloride 1. {ECO:0000250}.; BINDING 535 535 Chloride 1. {ECO:0000250}.; BINDING 797 797 Chloride 2. {ECO:0000250}.; BINDING 835 835 Chloride 3. {ECO:0000250}.; BINDING 1096 1096 Chloride 2. {ECO:0000250}.; BINDING 1100 1100 Chloride 2. {ECO:0000250}.; BINDING 1133 1133 Chloride 3. {ECO:0000250}.	Angiotensin-converting enzyme (ACE) (EC 3.2.1.-) (EC 3.4.15.1) (Dipeptidyl carboxypeptidase I) (Kininase II) (CD antigen CD143) [Cleaved into: Angiotensin-converting enzyme, soluble form]	Ace Dcp1	Rattus norvegicus (Rat)	SUBCELLULAR LOCATION: Angiotensin-converting enzyme, soluble form: Secreted {ECO:0000250}.; SUBCELLULAR LOCATION: Cell membrane {ECO:0000250}; Single-pass type I membrane protein {ECO:0000250}. Cytoplasm {ECO:0000250}. Note=Detected in both cell membrane and cytoplasm in neurons. {ECO:0000250}.	COFACTOR: Name=Zn(2+); Xref=ChEBI:CHEBI:29105; Evidence={ECO:0000250}; ; Note=Binds 2 Zn(2+) ions per subunit. Isoform Testis-specific only binds 1 Zn(2+) ion per subunit. {ECO:0000250};; COFACTOR: Name=chloride; Xref=ChEBI:CHEBI:17996; Evidence={ECO:0000250}; ; Note=Binds 3 chloride ions per subunit. {ECO:0000250};	METAL 396 396 Zinc 1; catalytic. {ECO:0000250}.; METAL 400 400 Zinc 1; catalytic. {ECO:0000250}.; METAL 424 424 Zinc 1; catalytic. {ECO:0000250}.; METAL 994 994 Zinc 2; catalytic. {ECO:0000250}.; METAL 998 998 Zinc 2; catalytic. {ECO:0000250}.; METAL 1022 1022 Zinc 2; catalytic. {ECO:0000250}.	P47820;
Q619N4	3.1.3.2		Putative acid phosphatase 1 (EC 3.1.3.2)	CBG14199	Caenorhabditis briggsae	SUBCELLULAR LOCATION: Membrane {ECO:0000305}; Single-pass type I membrane protein {ECO:0000305}.			Q619N4;
Q23534	3.1.3.2		Putative acid phosphatase 1 (EC 3.1.3.2)	apc-1 ZK563.6	Caenorhabditis elegans	SUBCELLULAR LOCATION: Membrane {ECO:0000305}; Single-pass type I membrane protein {ECO:0000305}.			Q23534;
Q9LX29	2.7.11.1	BINDING 540 540 ATP. {ECO:0000305}.	Serine/threonine-protein kinase-like protein ACR4 (EC 2.7.11.1) (Protein CRINKLY 4) (AtCR4)	ACR4 At3g59420 F25L23.280	Arabidopsis thaliana (Mouse-ear cress)	SUBCELLULAR LOCATION: Cell membrane; Single-pass type I membrane protein. Endosome, multivesicular body membrane; Single-pass type I membrane protein. Note=Also localized into protein export bodies. Internalization may be involved in degradation of ACR4 for its rapid turn-over. In the epidermis, mostly expressed in the lateral and basal planes of cells.			Q9LX29;
P33121	6.2.1.3		Long-chain-fatty-acid--CoA ligase 1 (EC 6.2.1.3) (Acyl-CoA synthetase 1) (ACS1) (Long-chain acyl-CoA synthetase 1) (LACS 1) (Long-chain acyl-CoA synthetase 2) (LACS 2) (Long-chain fatty acid-CoA ligase 2) (Palmitoyl-CoA ligase 1) (Palmitoyl-CoA ligase 2)	ACSL1 FACL1 FACL2 LACS LACS1 LACS2	Homo sapiens (Human)	SUBCELLULAR LOCATION: Mitochondrion outer membrane {ECO:0000250}; Single-pass type III membrane protein {ECO:0000250}. Peroxisome membrane {ECO:0000250}; Single-pass type III membrane protein {ECO:0000250}. Microsome membrane {ECO:0000250}; Single-pass type III membrane protein {ECO:0000250}. Endoplasmic reticulum membrane {ECO:0000250}; Single-pass type III membrane protein {ECO:0000250}.	COFACTOR: Name=Mg(2+); Xref=ChEBI:CHEBI:18420;		P33121;
P41216	6.2.1.3		Long-chain-fatty-acid--CoA ligase 1 (EC 6.2.1.3) (Long-chain acyl-CoA synthetase 1) (LACS 1)	Acsl1 Acsl2 Facl2	Mus musculus (Mouse)	SUBCELLULAR LOCATION: Mitochondrion outer membrane {ECO:0000250}; Single-pass type III membrane protein {ECO:0000250}. Peroxisome membrane {ECO:0000250}; Single-pass type III membrane protein {ECO:0000250}. Microsome membrane {ECO:0000250}; Single-pass type III membrane protein {ECO:0000250}. Endoplasmic reticulum membrane {ECO:0000250}; Single-pass type III membrane protein {ECO:0000250}.	COFACTOR: Name=Mg(2+); Xref=ChEBI:CHEBI:18420;		P41216;
P18163	6.2.1.3		Long-chain-fatty-acid--CoA ligase 1 (EC 6.2.1.3) (Long-chain acyl-CoA synthetase 1) (LACS 1) (Long-chain-fatty-acid--CoA ligase, liver isozyme)	Acsl1 Acs1 Acsl2 Facl2	Rattus norvegicus (Rat)	SUBCELLULAR LOCATION: Mitochondrion outer membrane {ECO:0000250}; Single-pass type III membrane protein {ECO:0000250}. Peroxisome membrane {ECO:0000250}; Single-pass type III membrane protein {ECO:0000250}. Microsome membrane {ECO:0000250}; Single-pass type III membrane protein {ECO:0000250}. Endoplasmic reticulum membrane {ECO:0000250}; Single-pass type III membrane protein {ECO:0000250}.	COFACTOR: Name=Mg(2+); Xref=ChEBI:CHEBI:18420;		P18163;
O95573	6.2.1.3		Long-chain-fatty-acid--CoA ligase 3 (EC 6.2.1.3) (Long-chain acyl-CoA synthetase 3) (LACS 3)	ACSL3 ACS3 FACL3 LACS3	Homo sapiens (Human)	SUBCELLULAR LOCATION: Mitochondrion outer membrane {ECO:0000250}; Single-pass type III membrane protein {ECO:0000250}. Peroxisome membrane {ECO:0000250}; Single-pass type III membrane protein {ECO:0000250}. Microsome membrane {ECO:0000250}; Single-pass type III membrane protein {ECO:0000250}. Endoplasmic reticulum membrane {ECO:0000250}; Single-pass type III membrane protein {ECO:0000250}.	COFACTOR: Name=Mg(2+); Xref=ChEBI:CHEBI:18420; Evidence={ECO:0000250};		O95573;
Q9CZW4	6.2.1.3		Long-chain-fatty-acid--CoA ligase 3 (EC 6.2.1.3) (Long-chain acyl-CoA synthetase 3) (LACS 3)	Acsl3 Acs3 Facl3	Mus musculus (Mouse)	SUBCELLULAR LOCATION: Mitochondrion outer membrane {ECO:0000250}; Single-pass type III membrane protein {ECO:0000250}. Peroxisome membrane {ECO:0000250}; Single-pass type III membrane protein {ECO:0000250}. Microsome membrane {ECO:0000250}; Single-pass type III membrane protein {ECO:0000250}. Endoplasmic reticulum membrane {ECO:0000250}; Single-pass type III membrane protein {ECO:0000250}.	COFACTOR: Name=Mg(2+); Xref=ChEBI:CHEBI:18420; Evidence={ECO:0000250};		Q9CZW4;
Q5R668	6.2.1.3		Long-chain-fatty-acid--CoA ligase 3 (EC 6.2.1.3) (Long-chain acyl-CoA synthetase 3) (LACS 3)	ACSL3	Pongo abelii (Sumatran orangutan) (Pongo pygmaeus abelii)	SUBCELLULAR LOCATION: Mitochondrion outer membrane {ECO:0000250}; Single-pass type III membrane protein {ECO:0000250}. Peroxisome membrane {ECO:0000250}; Single-pass type III membrane protein {ECO:0000250}. Microsome membrane {ECO:0000250}; Single-pass type III membrane protein {ECO:0000250}. Endoplasmic reticulum membrane {ECO:0000250}; Single-pass type III membrane protein {ECO:0000250}.	COFACTOR: Name=Mg(2+); Xref=ChEBI:CHEBI:18420; Evidence={ECO:0000250};		Q5R668;
Q63151	6.2.1.3		Long-chain-fatty-acid--CoA ligase 3 (EC 6.2.1.3) (Brain acyl-CoA synthetase II) (Long-chain acyl-CoA synthetase 3) (LACS 3)	Acsl3 Acs3 Facl3	Rattus norvegicus (Rat)	SUBCELLULAR LOCATION: Mitochondrion outer membrane {ECO:0000250}; Single-pass type III membrane protein {ECO:0000250}. Peroxisome membrane {ECO:0000250}; Single-pass type III membrane protein {ECO:0000250}. Microsome membrane {ECO:0000250}; Single-pass type III membrane protein {ECO:0000250}. Endoplasmic reticulum membrane {ECO:0000250}; Single-pass type III membrane protein {ECO:0000250}.	COFACTOR: Name=Mg(2+); Xref=ChEBI:CHEBI:18420; Evidence={ECO:0000250};		Q63151;
Q9QUJ7	6.2.1.3		Long-chain-fatty-acid--CoA ligase 4 (EC 6.2.1.3) (Long-chain acyl-CoA synthetase 4) (LACS 4) (mACS4)	Acsl4 Acs4 Facl4	Mus musculus (Mouse)	SUBCELLULAR LOCATION: Mitochondrion outer membrane {ECO:0000250}; Single-pass type III membrane protein {ECO:0000250}. Peroxisome membrane {ECO:0000250}; Single-pass type III membrane protein {ECO:0000250}. Microsome membrane {ECO:0000250}; Single-pass type III membrane protein {ECO:0000250}. Endoplasmic reticulum membrane {ECO:0000250}; Single-pass type III membrane protein {ECO:0000250}.	COFACTOR: Name=Mg(2+); Xref=ChEBI:CHEBI:18420; Evidence={ECO:0000250};		Q9QUJ7;
O60488	6.2.1.3		Long-chain-fatty-acid--CoA ligase 4 (EC 6.2.1.3) (Long-chain acyl-CoA synthetase 4) (LACS 4)	ACSL4 ACS4 FACL4 LACS4	Homo sapiens (Human)	SUBCELLULAR LOCATION: Mitochondrion outer membrane {ECO:0000250}; Single-pass type III membrane protein {ECO:0000250}. Peroxisome membrane {ECO:0000250}; Single-pass type III membrane protein {ECO:0000250}. Microsome membrane {ECO:0000250}; Single-pass type III membrane protein {ECO:0000250}. Endoplasmic reticulum membrane {ECO:0000250}; Single-pass type III membrane protein {ECO:0000250}.	COFACTOR: Name=Mg(2+); Xref=ChEBI:CHEBI:18420; Evidence={ECO:0000250};		O60488;
Q9ULC5	6.2.1.3		Long-chain-fatty-acid--CoA ligase 5 (EC 6.2.1.3) (Long-chain acyl-CoA synthetase 5) (LACS 5)	ACSL5 ACS5 FACL5 UNQ633/PRO1250	Homo sapiens (Human)	SUBCELLULAR LOCATION: Mitochondrion. Endoplasmic reticulum. Mitochondrion outer membrane {ECO:0000250}; Single-pass type III membrane protein {ECO:0000250}. Endoplasmic reticulum membrane {ECO:0000250}; Single-pass type III membrane protein {ECO:0000250}.	COFACTOR: Name=Mg(2+); Xref=ChEBI:CHEBI:18420; Evidence={ECO:0000250};		Q9ULC5;
Q8JZR0	6.2.1.3		Long-chain-fatty-acid--CoA ligase 5 (EC 6.2.1.3) (Long-chain acyl-CoA synthetase 5) (LACS 5)	Acsl5 Facl5	Mus musculus (Mouse)	SUBCELLULAR LOCATION: Mitochondrion {ECO:0000250}. Endoplasmic reticulum {ECO:0000250}. Mitochondrion outer membrane {ECO:0000250}; Single-pass type III membrane protein {ECO:0000250}. Endoplasmic reticulum membrane {ECO:0000250}; Single-pass type III membrane protein {ECO:0000250}.			Q8JZR0;
O88813	6.2.1.3		Long-chain-fatty-acid--CoA ligase 5 (EC 6.2.1.3) (Long-chain acyl-CoA synthetase 5) (LACS 5)	Acsl5 Acs5 Facl5	Rattus norvegicus (Rat)	SUBCELLULAR LOCATION: Mitochondrion {ECO:0000269|PubMed:16263710}. Endoplasmic reticulum {ECO:0000269|PubMed:16263710}. Mitochondrion outer membrane {ECO:0000250}; Single-pass type III membrane protein {ECO:0000250}. Endoplasmic reticulum membrane {ECO:0000250}; Single-pass type III membrane protein {ECO:0000250}.			O88813;
Q9UKU0	6.2.1.3		Long-chain-fatty-acid--CoA ligase 6 (EC 6.2.1.3) (Long-chain acyl-CoA synthetase 6) (LACS 6)	ACSL6 ACS2 FACL6 KIAA0837 LACS5	Homo sapiens (Human)	SUBCELLULAR LOCATION: Mitochondrion outer membrane {ECO:0000250}; Single-pass type III membrane protein {ECO:0000250}. Peroxisome membrane {ECO:0000250}; Single-pass type III membrane protein {ECO:0000250}. Microsome membrane {ECO:0000250}; Single-pass type III membrane protein {ECO:0000250}. Endoplasmic reticulum membrane {ECO:0000250}; Single-pass type III membrane protein {ECO:0000250}.	COFACTOR: Name=Mg(2+); Xref=ChEBI:CHEBI:18420;		Q9UKU0;
Q91WC3	6.2.1.3		Long-chain-fatty-acid--CoA ligase 6 (EC 6.2.1.3) (Long-chain acyl-CoA synthetase 6) (LACS 6)	Acsl6 Facl6	Mus musculus (Mouse)	SUBCELLULAR LOCATION: Mitochondrion outer membrane {ECO:0000250}; Single-pass type III membrane protein {ECO:0000250}. Peroxisome membrane {ECO:0000250}; Single-pass type III membrane protein {ECO:0000250}. Microsome membrane {ECO:0000250}; Single-pass type III membrane protein {ECO:0000250}. Endoplasmic reticulum membrane {ECO:0000250}; Single-pass type III membrane protein {ECO:0000250}.	COFACTOR: Name=Mg(2+); Xref=ChEBI:CHEBI:18420; Evidence={ECO:0000250};		Q91WC3;
P33124	6.2.1.3		Long-chain-fatty-acid--CoA ligase 6 (EC 6.2.1.3) (Long-chain acyl-CoA synthetase 6) (LACS 6) (Long-chain-fatty-acid--CoA ligase, brain isozyme)	Acsl6 Acs2 Facl6	Rattus norvegicus (Rat)	SUBCELLULAR LOCATION: Mitochondrion outer membrane {ECO:0000250}; Single-pass type III membrane protein {ECO:0000250}. Peroxisome membrane {ECO:0000250}; Single-pass type III membrane protein {ECO:0000250}. Microsome membrane {ECO:0000250}; Single-pass type III membrane protein {ECO:0000250}. Endoplasmic reticulum membrane {ECO:0000250}; Single-pass type III membrane protein {ECO:0000250}.	COFACTOR: Name=Mg(2+); Xref=ChEBI:CHEBI:18420;		P33124;
P36896	2.7.11.30	BINDING 234 234 ATP. {ECO:0000255|PROSITE-ProRule:PRU00159}.	Activin receptor type-1B (EC 2.7.11.30) (Activin receptor type IB) (ACTR-IB) (Activin receptor-like kinase 4) (ALK-4) (Serine/threonine-protein kinase receptor R2) (SKR2)	ACVR1B ACVRLK4 ALK4	Homo sapiens (Human)	SUBCELLULAR LOCATION: Cell membrane {ECO:0000250}; Single-pass type I membrane protein {ECO:0000250}.	COFACTOR: Name=Mg(2+); Xref=ChEBI:CHEBI:18420; Evidence={ECO:0000250}; Name=Mn(2+); Xref=ChEBI:CHEBI:29035; Evidence={ECO:0000250};		P36896;
Q61271	2.7.11.30	BINDING 234 234 ATP. {ECO:0000255|PROSITE-ProRule:PRU00159}.	Activin receptor type-1B (EC 2.7.11.30) (Activin receptor type IB) (ACTR-IB) (Activin receptor-like kinase 4) (ALK-4) (Serine/threonine-protein kinase receptor R2) (SKR2)	Acvr1b Alk4	Mus musculus (Mouse)	SUBCELLULAR LOCATION: Cell membrane {ECO:0000250}; Single-pass type I membrane protein {ECO:0000250}.			Q61271;
P80202	2.7.11.30	BINDING 234 234 ATP. {ECO:0000255|PROSITE-ProRule:PRU00159}.	Activin receptor type-1B (EC 2.7.11.30) (Activin receptor type IB) (ACTR-IB) (Activin receptor-like kinase 4) (ALK-4) (Serine/threonine-protein kinase receptor R2) (SKR2)	Acvr1b Acvrlk4 Alk4	Rattus norvegicus (Rat)	SUBCELLULAR LOCATION: Cell membrane {ECO:0000250}; Single-pass type I membrane protein {ECO:0000250}.	COFACTOR: Name=Mg(2+); Xref=ChEBI:CHEBI:18420; Evidence={ECO:0000250}; Name=Mn(2+); Xref=ChEBI:CHEBI:29035; Evidence={ECO:0000250};		P80202;
Q8NER5	2.7.11.30	BINDING 222 222 ATP. {ECO:0000250|UniProtKB:Q04771, ECO:0000255|PROSITE-ProRule:PRU00159}.	Activin receptor type-1C (EC 2.7.11.30) (Activin receptor type IC) (ACTR-IC) (Activin receptor-like kinase 7) (ALK-7)	ACVR1C ALK7	Homo sapiens (Human)	SUBCELLULAR LOCATION: Membrane {ECO:0000269|PubMed:12606401}; Single-pass type I membrane protein {ECO:0000269|PubMed:12606401}.	COFACTOR: Name=Mg(2+); Xref=ChEBI:CHEBI:18420; Evidence={ECO:0000305}; Name=Mn(2+); Xref=ChEBI:CHEBI:29035; Evidence={ECO:0000305};		Q8NER5;
Q8K348	2.7.11.30	BINDING 222 222 ATP. {ECO:0000250|UniProtKB:Q04771, ECO:0000255|PROSITE-ProRule:PRU00159}.	Activin receptor type-1C (EC 2.7.11.30) (Activin receptor type IC) (ACTR-IC) (Activin receptor-like kinase 7) (ALK-7)	Acvr1c Alk7	Mus musculus (Mouse)	SUBCELLULAR LOCATION: Membrane {ECO:0000250}; Single-pass type I membrane protein {ECO:0000250}.	COFACTOR: Name=Mg(2+); Xref=ChEBI:CHEBI:18420; Evidence={ECO:0000305}; Name=Mn(2+); Xref=ChEBI:CHEBI:29035; Evidence={ECO:0000305};		Q8K348;
P70539	2.7.11.30	BINDING 222 222 ATP. {ECO:0000250|UniProtKB:Q04771, ECO:0000255|PROSITE-ProRule:PRU00159}.	Activin receptor type-1C (EC 2.7.11.30) (Activin receptor type IC) (ACTR-IC) (Activin receptor-like kinase 7) (ALK-7)	Acvr1c Alk7	Rattus norvegicus (Rat)	SUBCELLULAR LOCATION: Membrane {ECO:0000269|PubMed:15196700}; Single-pass type I membrane protein {ECO:0000269|PubMed:15196700}.	COFACTOR: Name=Mg(2+); Xref=ChEBI:CHEBI:18420; Evidence={ECO:0000305}; Name=Mn(2+); Xref=ChEBI:CHEBI:29035; Evidence={ECO:0000305};		P70539;
P37023	2.7.11.30	BINDING 229 229 ATP. {ECO:0000255|PROSITE-ProRule:PRU00159}.	Serine/threonine-protein kinase receptor R3 (SKR3) (EC 2.7.11.30) (Activin receptor-like kinase 1) (ALK-1) (TGF-B superfamily receptor type I) (TSR-I)	ACVRL1 ACVRLK1 ALK1	Homo sapiens (Human)	SUBCELLULAR LOCATION: Membrane; Single-pass type I membrane protein.	COFACTOR: Name=Mg(2+); Xref=ChEBI:CHEBI:18420; Evidence={ECO:0000250}; Name=Mn(2+); Xref=ChEBI:CHEBI:29035; Evidence={ECO:0000250};		P37023;
Q61288	2.7.11.30	BINDING 228 228 ATP. {ECO:0000255|PROSITE-ProRule:PRU00159}.	Serine/threonine-protein kinase receptor R3 (SKR3) (EC 2.7.11.30) (Activin receptor-like kinase 1) (ALK-1) (TGF-B superfamily receptor type I) (TSR-I)	Acvrl1 Acvrlk1 Alk-1	Mus musculus (Mouse)	SUBCELLULAR LOCATION: Membrane; Single-pass type I membrane protein.	COFACTOR: Name=Mg(2+); Xref=ChEBI:CHEBI:18420; Evidence={ECO:0000250}; Name=Mn(2+); Xref=ChEBI:CHEBI:29035; Evidence={ECO:0000250};		Q61288;
Q5RAN0	2.7.11.30	BINDING 229 229 ATP. {ECO:0000255|PROSITE-ProRule:PRU00159}.	Serine/threonine-protein kinase receptor R3 (SKR3) (EC 2.7.11.30) (Activin receptor-like kinase 1) (ALK-1)	ACVRL1	Pongo abelii (Sumatran orangutan) (Pongo pygmaeus abelii)	SUBCELLULAR LOCATION: Membrane {ECO:0000250}; Single-pass type I membrane protein {ECO:0000250}.	COFACTOR: Name=Mg(2+); Xref=ChEBI:CHEBI:18420; Evidence={ECO:0000250}; Name=Mn(2+); Xref=ChEBI:CHEBI:29035; Evidence={ECO:0000250};		Q5RAN0;
P80203	2.7.11.30	BINDING 230 230 ATP. {ECO:0000255|PROSITE-ProRule:PRU00159}.	Serine/threonine-protein kinase receptor R3 (SKR3) (EC 2.7.11.30) (TGF-B superfamily receptor type I) (TSR-I)	Acvrl1 Acvrlk1	Rattus norvegicus (Rat)	SUBCELLULAR LOCATION: Membrane; Single-pass type I membrane protein.	COFACTOR: Name=Mg(2+); Xref=ChEBI:CHEBI:18420; Evidence={ECO:0000250}; Name=Mn(2+); Xref=ChEBI:CHEBI:29035; Evidence={ECO:0000250};		P80203;
Q28041	2.7.11.30	BINDING 235 235 ATP. {ECO:0000255|PROSITE-ProRule:PRU00159}.	Activin receptor type-1 (EC 2.7.11.30) (Activin receptor type I) (ACTR-I) (Serine/threonine-protein kinase receptor R1) (SKR1)	ACVR1 ACVRLK2	Bos taurus (Bovine)	SUBCELLULAR LOCATION: Membrane; Single-pass type I membrane protein.	COFACTOR: Name=Mg(2+); Xref=ChEBI:CHEBI:18420; Evidence={ECO:0000250}; Name=Mn(2+); Xref=ChEBI:CHEBI:29035; Evidence={ECO:0000250};		Q28041;
Q90ZK6	2.7.11.30	BINDING 230 230 ATP. {ECO:0000255|PROSITE-ProRule:PRU00159}.	Activin receptor type-1 (EC 2.7.11.30) (Activin receptor type I) (Type I TGF B receptor)	ACVR1	Gallus gallus (Chicken)	SUBCELLULAR LOCATION: Membrane {ECO:0000250}; Single-pass type I membrane protein {ECO:0000250}.	COFACTOR: Name=Mg(2+); Xref=ChEBI:CHEBI:18420; Evidence={ECO:0000250}; Name=Mn(2+); Xref=ChEBI:CHEBI:29035; Evidence={ECO:0000250};		Q90ZK6;
Q04771	2.7.11.30	BINDING 235 235 ATP. {ECO:0000255|PROSITE-ProRule:PRU00159}.	Activin receptor type-1 (EC 2.7.11.30) (Activin receptor type I) (ACTR-I) (Activin receptor-like kinase 2) (ALK-2) (Serine/threonine-protein kinase receptor R1) (SKR1) (TGF-B superfamily receptor type I) (TSR-I)	ACVR1 ACVRLK2	Homo sapiens (Human)	SUBCELLULAR LOCATION: Membrane; Single-pass type I membrane protein.	COFACTOR: Name=Mg(2+); Xref=ChEBI:CHEBI:18420; Evidence={ECO:0000250}; Name=Mn(2+); Xref=ChEBI:CHEBI:29035; Evidence={ECO:0000250};		Q04771;
P37172	2.7.11.30	BINDING 235 235 ATP. {ECO:0000255|PROSITE-ProRule:PRU00159}.	Activin receptor type-1 (EC 2.7.11.30) (Activin receptor type I) (ACTR-I) (Serine/threonine-protein kinase receptor R1) (SKR1) (TGF-B superfamily receptor type I) (TSR-I) (TSK-7L)	Acvr1 Acvrlk2 Tgfb1	Mus musculus (Mouse)	SUBCELLULAR LOCATION: Membrane; Single-pass type I membrane protein.	COFACTOR: Name=Mg(2+); Xref=ChEBI:CHEBI:18420; Evidence={ECO:0000250}; Name=Mn(2+); Xref=ChEBI:CHEBI:29035; Evidence={ECO:0000250};		P37172;
P80201	2.7.11.30	BINDING 235 235 ATP. {ECO:0000255|PROSITE-ProRule:PRU00159}.	Activin receptor type-1 (EC 2.7.11.30) (Activin receptor type I) (ACTR-I) (Serine/threonine-protein kinase receptor R1) (SKR1) (TGF-B superfamily receptor type I) (TSR-I)	Acvr1 Acvrlk2	Rattus norvegicus (Rat)	SUBCELLULAR LOCATION: Membrane; Single-pass type I membrane protein.	COFACTOR: Name=Mg(2+); Xref=ChEBI:CHEBI:18420; Evidence={ECO:0000250}; Name=Mn(2+); Xref=ChEBI:CHEBI:29035; Evidence={ECO:0000250};		P80201;
A0QWG5	2.3.1.-		Phosphatidylinositol mannoside acyltransferase (PIM acyltransferase) (EC 2.3.1.-)	MSMEG_2934 MSMEI_2860	Mycobacterium smegmatis (strain ATCC 700084 / mc(2)155)	SUBCELLULAR LOCATION: Cell membrane {ECO:0000305|PubMed:12851411}; Single-pass membrane protein {ECO:0000305|PubMed:12851411}.			A0QWG5;
P9WMB4	2.3.1.-		Phosphatidylinositol mannoside acyltransferase (PIM acyltransferase) (EC 2.3.1.-)	MT2686	Mycobacterium tuberculosis (strain CDC 1551 / Oshkosh)	SUBCELLULAR LOCATION: Cell membrane {ECO:0000250}; Single-pass membrane protein {ECO:0000250}.			P9WMB4;
P9WMB5	2.3.1.-		Phosphatidylinositol mannoside acyltransferase (PIM acyltransferase) (EC 2.3.1.-)	Rv2611c	Mycobacterium tuberculosis (strain ATCC 25618 / H37Rv)	SUBCELLULAR LOCATION: Cell membrane {ECO:0000305}; Single-pass membrane protein {ECO:0000305}.			P9WMB5;
Q9R158	3.4.24.-		Disintegrin and metalloproteinase domain-containing protein 26A (ADAM 26A) (EC 3.4.24.-) (Testase-3)	Adam26a Adam26	Mus musculus (Mouse)	SUBCELLULAR LOCATION: Membrane; Single-pass type I membrane protein.	COFACTOR: Name=Zn(2+); Xref=ChEBI:CHEBI:29105; Evidence={ECO:0000250}; ; Note=Binds 1 zinc ion per subunit. {ECO:0000250};	METAL 161 161 Zinc; in inhibited form. {ECO:0000250}.; METAL 329 329 Zinc; catalytic. {ECO:0000250}.; METAL 333 333 Zinc; catalytic. {ECO:0000250}.; METAL 339 339 Zinc; catalytic. {ECO:0000250}.	Q9R158;
Q10741	3.4.24.81		Disintegrin and metalloproteinase domain-containing protein 10 (ADAM 10) (EC 3.4.24.81) (Kuzbanian protein homolog) (Mammalian disintegrin-metalloprotease) (Myelin-associated metalloproteinase) (CD antigen CD156c)	ADAM10 MADM	Bos taurus (Bovine)	SUBCELLULAR LOCATION: Golgi apparatus membrane; Single-pass type I membrane protein. Cell membrane; Single-pass type I membrane protein. Note=The protealytically activated form is localized mainly in the plasma membrane whereas the proenzyme is found intracellularly in the Golgi.	COFACTOR: Name=Zn(2+); Xref=ChEBI:CHEBI:29105; Evidence={ECO:0000250}; ; Note=Binds 1 zinc ion. {ECO:0000250};	METAL 173 173 Zinc; in inhibited form. {ECO:0000250}.; METAL 383 383 Zinc; catalytic. {ECO:0000250}.; METAL 387 387 Zinc; catalytic. {ECO:0000250}.; METAL 393 393 Zinc; catalytic. {ECO:0000250}.	Q10741;
O14672	3.4.24.81		Disintegrin and metalloproteinase domain-containing protein 10 (ADAM 10) (EC 3.4.24.81) (CDw156) (Kuzbanian protein homolog) (Mammalian disintegrin-metalloprotease) (CD antigen CD156c)	ADAM10 KUZ MADM	Homo sapiens (Human)	SUBCELLULAR LOCATION: Cell membrane; Single-pass type I membrane protein. Endomembrane system; Single-pass type I membrane protein. Note=Is localized in the plasma membrane but is predominantly expressed in the Golgi apparatus and in released membrane vesicles derived likely from the Golgi.	COFACTOR: Name=Zn(2+); Xref=ChEBI:CHEBI:29105; Evidence={ECO:0000250}; ; Note=Binds 1 zinc ion. {ECO:0000250};	METAL 173 173 Zinc; in inhibited form. {ECO:0000250}.; METAL 383 383 Zinc; catalytic.; METAL 387 387 Zinc; catalytic.; METAL 393 393 Zinc; catalytic.	O14672;
O35598	3.4.24.81		Disintegrin and metalloproteinase domain-containing protein 10 (ADAM 10) (EC 3.4.24.81) (Kuzbanian protein homolog) (Mammalian disintegrin-metalloprotease) (CD antigen CD156c)	Adam10 Kuz Madm	Mus musculus (Mouse)	SUBCELLULAR LOCATION: Membrane; Single-pass type I membrane protein.	COFACTOR: Name=Zn(2+); Xref=ChEBI:CHEBI:29105; Evidence={ECO:0000250}; ; Note=Binds 1 zinc ion. {ECO:0000250};	METAL 173 173 Zinc; in inhibited form. {ECO:0000250}.; METAL 384 384 Zinc; catalytic.; METAL 388 388 Zinc; catalytic.; METAL 394 394 Zinc; catalytic.	O35598;
Q10743	3.4.24.81		Disintegrin and metalloproteinase domain-containing protein 10 (ADAM 10) (EC 3.4.24.81) (Kuzbanian protein homolog) (Mammalian disintegrin-metalloprotease) (CD antigen CD156c) (Fragment)	Adam10 Madm	Rattus norvegicus (Rat)	SUBCELLULAR LOCATION: Membrane; Single-pass type I membrane protein.	COFACTOR: Name=Zn(2+); Xref=ChEBI:CHEBI:29105; Evidence={ECO:0000250}; ; Note=Binds 1 zinc ion. {ECO:0000250};	METAL 179 179 Zinc; catalytic. {ECO:0000250}.; METAL 183 183 Zinc; catalytic. {ECO:0000250}.; METAL 189 189 Zinc; catalytic. {ECO:0000250}.	Q10743;
Q8JIY1	3.4.24.81		Disintegrin and metalloproteinase domain-containing protein 10 (ADAM 10) (EC 3.4.24.81) (Kuzbanian protein homolog) (xKuz)	adam10 kuz	Xenopus laevis (African clawed frog)	SUBCELLULAR LOCATION: Membrane; Single-pass type I membrane protein.	COFACTOR: Name=Zn(2+); Xref=ChEBI:CHEBI:29105; Evidence={ECO:0000250}; ; Note=Binds 1 zinc ion. {ECO:0000250};	METAL 172 172 Zinc; in inhibited form. {ECO:0000250}.; METAL 384 384 Zinc; catalytic.; METAL 388 388 Zinc; catalytic.; METAL 394 394 Zinc; catalytic.	Q8JIY1;
O43184	3.4.24.-		Disintegrin and metalloproteinase domain-containing protein 12 (ADAM 12) (EC 3.4.24.-) (Meltrin-alpha)	ADAM12 MLTN UNQ346/PRO545	Homo sapiens (Human)	SUBCELLULAR LOCATION: Isoform 1: Cell membrane; Single-pass type I membrane protein.; SUBCELLULAR LOCATION: Isoform 2: Secreted.; SUBCELLULAR LOCATION: Isoform 3: Secreted {ECO:0000305}.; SUBCELLULAR LOCATION: Isoform 4: Secreted {ECO:0000305}.	COFACTOR: Name=Zn(2+); Xref=ChEBI:CHEBI:29105; ; Note=Binds 1 zinc ion per subunit.;	METAL 179 179 Zinc; in inhibited form. {ECO:0000250}.; METAL 350 350 Zinc; catalytic.; METAL 354 354 Zinc; catalytic.; METAL 360 360 Zinc; catalytic.	O43184;
Q61824	3.4.24.-		Disintegrin and metalloproteinase domain-containing protein 12 (ADAM 12) (EC 3.4.24.-) (Meltrin-alpha)	Adam12 Mltna	Mus musculus (Mouse)	SUBCELLULAR LOCATION: Membrane; Single-pass type I membrane protein.	COFACTOR: Name=Zn(2+); Xref=ChEBI:CHEBI:29105; Evidence={ECO:0000250}; ; Note=Binds 1 zinc ion per subunit. {ECO:0000250};	METAL 177 177 Zinc; in inhibited form. {ECO:0000250}.; METAL 348 348 Zinc; catalytic. {ECO:0000250}.; METAL 352 352 Zinc; catalytic. {ECO:0000250}.; METAL 358 358 Zinc; catalytic. {ECO:0000250}.	Q61824;
Q13444	3.4.24.-		Disintegrin and metalloproteinase domain-containing protein 15 (ADAM 15) (EC 3.4.24.-) (Metalloprotease RGD disintegrin protein) (Metalloproteinase-like, disintegrin-like, and cysteine-rich protein 15) (MDC-15) (Metargidin)	ADAM15 MDC15	Homo sapiens (Human)	SUBCELLULAR LOCATION: Endomembrane system {ECO:0000269|PubMed:12243749}; Single-pass type I membrane protein {ECO:0000269|PubMed:12243749}. Cell junction, adherens junction {ECO:0000269|PubMed:12243749}. Cell projection, cilium, flagellum {ECO:0000250}. Cytoplasmic vesicle, secretory vesicle, acrosome {ECO:0000250}. Note=The majority of the protein is localized in a perinuclear compartment which …	COFACTOR: Name=Zn(2+); Xref=ChEBI:CHEBI:29105; Evidence={ECO:0000250}; ; Note=Binds 1 zinc ion per subunit. {ECO:0000250};	METAL 179 179 Zinc; in inhibited form. {ECO:0000250}.; METAL 348 348 Zinc; catalytic. {ECO:0000250}.; METAL 352 352 Zinc; catalytic. {ECO:0000250}.; METAL 358 358 Zinc; catalytic. {ECO:0000250}.	Q13444;
O88839	3.4.24.-		Disintegrin and metalloproteinase domain-containing protein 15 (ADAM 15) (EC 3.4.24.-) (AD56) (Metalloprotease RGD disintegrin protein) (Metalloproteinase-like, disintegrin-like, and cysteine-rich protein 15) (MDC-15) (Metargidin)	Adam15 Mdc15	Mus musculus (Mouse)	SUBCELLULAR LOCATION: Endomembrane system {ECO:0000269|PubMed:18390692}; Single-pass type I membrane protein {ECO:0000269|PubMed:18390692}. Cell junction, adherens junction {ECO:0000250}. Cell projection, cilium, flagellum {ECO:0000269|PubMed:18390692}. Cytoplasmic vesicle, secretory vesicle, acrosome {ECO:0000269|PubMed:18390692}. Note=The majority of the protein is localized in a perinuclear co…	COFACTOR: Name=Zn(2+); Xref=ChEBI:CHEBI:29105; Evidence={ECO:0000305}; ; Note=Binds 1 zinc ion per subunit. {ECO:0000305};	METAL 179 179 Zinc; in inhibited form. {ECO:0000250}.; METAL 349 349 Zinc; catalytic. {ECO:0000255}.; METAL 353 353 Zinc; catalytic. {ECO:0000255}.; METAL 359 359 Zinc; catalytic. {ECO:0000255}.	O88839;
Q9QYV0	3.4.24.-		Disintegrin and metalloproteinase domain-containing protein 15 (ADAM 15) (EC 3.4.24.-) (CRII-7) (Metalloprotease RGD disintegrin protein) (Metalloproteinase-like, disintegrin-like, and cysteine-rich protein 15) (MDC-15) (Metargidin)	Adam15 Mdc15	Rattus norvegicus (Rat)	SUBCELLULAR LOCATION: Endomembrane system {ECO:0000250}; Single-pass type I membrane protein {ECO:0000250}. Cell junction, adherens junction {ECO:0000250}. Cell projection, cilium, flagellum {ECO:0000250}. Cytoplasmic vesicle, secretory vesicle, acrosome {ECO:0000250}. Note=The majority of the protein is localized in a perinuclear compartment which may correspond to the trans-Golgi network or the…	COFACTOR: Name=Zn(2+); Xref=ChEBI:CHEBI:29105; Evidence={ECO:0000305}; ; Note=Binds 1 zinc ion per subunit. {ECO:0000305};	METAL 180 180 Zinc; in inhibited form. {ECO:0000250}.; METAL 350 350 Zinc; catalytic. {ECO:0000255}.; METAL 354 354 Zinc; catalytic. {ECO:0000255}.; METAL 360 360 Zinc; catalytic. {ECO:0000255}.	Q9QYV0;
Q9VAC5	3.4.24.-		ADAM 17-like protease (EC 3.4.24.-)	Tace CG7908	Drosophila melanogaster (Fruit fly)	SUBCELLULAR LOCATION: Membrane {ECO:0000305}; Single-pass type I membrane protein {ECO:0000305}.	COFACTOR: Name=Zn(2+); Xref=ChEBI:CHEBI:29105; Evidence={ECO:0000250}; ; Note=Binds 1 zinc ion per subunit. {ECO:0000250};	METAL 183 183 Zinc; in inhibited form. {ECO:0000250}.; METAL 399 399 Zinc; catalytic. {ECO:0000250}.; METAL 403 403 Zinc; catalytic. {ECO:0000250}.; METAL 409 409 Zinc; catalytic. {ECO:0000250}.	Q9VAC5;
P78536	3.4.24.86		Disintegrin and metalloproteinase domain-containing protein 17 (ADAM 17) (EC 3.4.24.86) (Snake venom-like protease) (TNF-alpha convertase) (TNF-alpha-converting enzyme) (CD antigen CD156b)	ADAM17 CSVP TACE	Homo sapiens (Human)	SUBCELLULAR LOCATION: Membrane; Single-pass type I membrane protein.	COFACTOR: Name=Zn(2+); Xref=ChEBI:CHEBI:29105; ; Note=Binds 1 zinc ion per subunit.;	METAL 184 184 Zinc; in inhibited form. {ECO:0000250}.; METAL 405 405 Zinc; catalytic.; METAL 409 409 Zinc; catalytic.; METAL 415 415 Zinc; catalytic.	P78536;
Q9Z0F8	3.4.24.86		Disintegrin and metalloproteinase domain-containing protein 17 (ADAM 17) (EC 3.4.24.86) (TNF-alpha convertase) (TNF-alpha-converting enzyme) (CD antigen CD156b)	Adam17 Tace	Mus musculus (Mouse)	SUBCELLULAR LOCATION: Isoform Long: Cell membrane; Single-pass type I membrane protein.; SUBCELLULAR LOCATION: Isoform Short: Secreted.	COFACTOR: Name=Zn(2+); Xref=ChEBI:CHEBI:29105; Evidence={ECO:0000250}; ; Note=Binds 1 zinc ion per subunit. {ECO:0000250};	METAL 184 184 Zinc; in inhibited form. {ECO:0000250}.; METAL 405 405 Zinc; catalytic. {ECO:0000250}.; METAL 409 409 Zinc; catalytic. {ECO:0000250}.; METAL 415 415 Zinc; catalytic. {ECO:0000250}.	Q9Z0F8;
Q9Z1K9	3.4.24.86		Disintegrin and metalloproteinase domain-containing protein 17 (ADAM 17) (EC 3.4.24.86) (TNF-alpha convertase) (TNF-alpha-converting enzyme) (CD antigen CD156b)	Adam17 Tace	Rattus norvegicus (Rat)	SUBCELLULAR LOCATION: Membrane; Single-pass type I membrane protein.	COFACTOR: Name=Zn(2+); Xref=ChEBI:CHEBI:29105; Evidence={ECO:0000250}; ; Note=Binds 1 zinc ion per subunit. {ECO:0000250};	METAL 184 184 Zinc; in inhibited form. {ECO:0000250}.; METAL 405 405 Zinc; catalytic. {ECO:0000250}.; METAL 409 409 Zinc; catalytic. {ECO:0000250}.; METAL 415 415 Zinc; catalytic. {ECO:0000250}.	Q9Z1K9;
Q9H013	3.4.24.-		Disintegrin and metalloproteinase domain-containing protein 19 (ADAM 19) (EC 3.4.24.-) (Meltrin-beta) (Metalloprotease and disintegrin dendritic antigen marker) (MADDAM)	ADAM19 MLTNB FKSG34	Homo sapiens (Human)	SUBCELLULAR LOCATION: Membrane; Single-pass type I membrane protein.	COFACTOR: Name=Zn(2+); Xref=ChEBI:CHEBI:29105; Evidence={ECO:0000250}; ; Note=Binds 1 zinc ion per subunit. {ECO:0000250};	METAL 132 132 Zinc; in inhibited form. {ECO:0000250}.; METAL 345 345 Zinc; catalytic. {ECO:0000250}.; METAL 349 349 Zinc; catalytic. {ECO:0000250}.; METAL 355 355 Zinc; catalytic. {ECO:0000250}.	Q9H013;
O35674	3.4.24.-		Disintegrin and metalloproteinase domain-containing protein 19 (ADAM 19) (EC 3.4.24.-) (Meltrin-beta)	Adam19 Mltnb	Mus musculus (Mouse)	SUBCELLULAR LOCATION: Membrane; Single-pass type I membrane protein.	COFACTOR: Name=Zn(2+); Xref=ChEBI:CHEBI:29105; Evidence={ECO:0000250}; ; Note=Binds 1 zinc ion per subunit. {ECO:0000250};	METAL 133 133 Zinc; in inhibited form. {ECO:0000250}.; METAL 346 346 Zinc; catalytic.; METAL 350 350 Zinc; catalytic.; METAL 356 356 Zinc; catalytic.	O35674;
O43506	3.4.24.-		Disintegrin and metalloproteinase domain-containing protein 20 (ADAM 20) (EC 3.4.24.-)	ADAM20	Homo sapiens (Human)	SUBCELLULAR LOCATION: Membrane; Single-pass type I membrane protein.	COFACTOR: Name=Zn(2+); Xref=ChEBI:CHEBI:29105; Evidence={ECO:0000305}; ; Note=Binds 1 zinc ion per subunit. {ECO:0000305};	METAL 173 173 Zinc; in inhibited form. {ECO:0000250}.; METAL 342 342 Zinc; catalytic. {ECO:0000255}.; METAL 346 346 Zinc; catalytic. {ECO:0000255}.; METAL 352 352 Zinc; catalytic. {ECO:0000255}.	O43506;
Q9UKJ8	3.4.24.-		Disintegrin and metalloproteinase domain-containing protein 21 (ADAM 21) (EC 3.4.24.-)	ADAM21	Homo sapiens (Human)	SUBCELLULAR LOCATION: Membrane; Single-pass type I membrane protein.	COFACTOR: Name=Zn(2+); Xref=ChEBI:CHEBI:29105; Evidence={ECO:0000305}; ; Note=Binds 1 zinc ion per subunit. {ECO:0000305};	METAL 173 173 Zinc; in inhibited form. {ECO:0000250}.; METAL 341 341 Zinc; catalytic. {ECO:0000255}.; METAL 345 345 Zinc; catalytic. {ECO:0000255}.; METAL 351 351 Zinc; catalytic. {ECO:0000255}.	Q9UKJ8;
Q9JI76	3.4.24.-		Disintegrin and metalloproteinase domain-containing protein 21 (ADAM 21) (EC 3.4.24.-) (Disintegrin and metalloproteinase domain-containing protein 31) (ADAM 31)	Adam21 Adam31	Mus musculus (Mouse)	SUBCELLULAR LOCATION: Membrane; Single-pass type I membrane protein.	COFACTOR: Name=Zn(2+); Xref=ChEBI:CHEBI:29105; Evidence={ECO:0000305}; ; Note=Binds 1 zinc ion per subunit. {ECO:0000305};	METAL 178 178 Zinc; in inhibited form. {ECO:0000250}.; METAL 345 345 Zinc; catalytic. {ECO:0000255}.; METAL 349 349 Zinc; catalytic. {ECO:0000255}.; METAL 355 355 Zinc; catalytic. {ECO:0000255}.	Q9JI76;
Q9R160	3.4.24.-		Disintegrin and metalloproteinase domain-containing protein 24 (ADAM 24) (EC 3.4.24.-) (Testase-1)	Adam24	Mus musculus (Mouse)	SUBCELLULAR LOCATION: Membrane; Single-pass type I membrane protein.	COFACTOR: Name=Zn(2+); Xref=ChEBI:CHEBI:29105; Evidence={ECO:0000250}; ; Note=Binds 1 zinc ion per subunit. {ECO:0000250};	METAL 174 174 Zinc; in inhibited form. {ECO:0000250}.; METAL 342 342 Zinc; catalytic. {ECO:0000250}.; METAL 346 346 Zinc; catalytic. {ECO:0000250}.; METAL 352 352 Zinc; catalytic. {ECO:0000250}.	Q9R160;
Q9R159	3.4.24.-		Disintegrin and metalloproteinase domain-containing protein 25 (ADAM 25) (EC 3.4.24.-) (Testase-2)	Adam25	Mus musculus (Mouse)	SUBCELLULAR LOCATION: Membrane; Single-pass type I membrane protein.	COFACTOR: Name=Zn(2+); Xref=ChEBI:CHEBI:29105; Evidence={ECO:0000250}; ; Note=Binds 1 zinc ion per subunit. {ECO:0000250};	METAL 188 188 Zinc; in inhibited form. {ECO:0000250}.; METAL 355 355 Zinc; catalytic. {ECO:0000250}.; METAL 359 359 Zinc; catalytic. {ECO:0000250}.; METAL 365 365 Zinc; catalytic. {ECO:0000250}.	Q9R159;
Q9UKQ2	3.4.24.-		Disintegrin and metalloproteinase domain-containing protein 28 (ADAM 28) (EC 3.4.24.-) (Epididymal metalloproteinase-like, disintegrin-like, and cysteine-rich protein II) (eMDC II) (Metalloproteinase-like, disintegrin-like, and cysteine-rich protein L) (MDC-L)	ADAM28 ADAM23 MDCL	Homo sapiens (Human)	SUBCELLULAR LOCATION: Isoform 1: Cell membrane; Single-pass type I membrane protein.; SUBCELLULAR LOCATION: Isoform 2: Secreted.	COFACTOR: Name=Zn(2+); Xref=ChEBI:CHEBI:29105; Evidence={ECO:0000250}; ; Note=Binds 1 zinc ion per subunit. {ECO:0000250};	METAL 169 169 Zinc; in inhibited form. {ECO:0000250}.; METAL 339 339 Zinc; catalytic. {ECO:0000250}.; METAL 343 343 Zinc; catalytic. {ECO:0000250}.; METAL 349 349 Zinc; catalytic. {ECO:0000250}.	Q9UKQ2;
Q9XSL6	3.4.24.-		Disintegrin and metalloproteinase domain-containing protein 28 (ADAM 28) (EC 3.4.24.-) (Epididymal metalloproteinase-like, disintegrin-like, and cysteine-rich protein II) (eMDC II)	ADAM28	Macaca fascicularis (Crab-eating macaque) (Cynomolgus monkey)	SUBCELLULAR LOCATION: Membrane; Single-pass type I membrane protein.	COFACTOR: Name=Zn(2+); Xref=ChEBI:CHEBI:29105; Evidence={ECO:0000250}; ; Note=Binds 1 zinc ion per subunit. {ECO:0000250};	METAL 170 170 Zinc; in inhibited form. {ECO:0000250}.; METAL 340 340 Zinc; catalytic. {ECO:0000250}.; METAL 344 344 Zinc; catalytic. {ECO:0000250}.; METAL 350 350 Zinc; catalytic. {ECO:0000250}.	Q9XSL6;
Q9JLN6	3.4.24.-		Disintegrin and metalloproteinase domain-containing protein 28 (ADAM 28) (EC 3.4.24.-) (Thymic epithelial cell-ADAM) (TECADAM)	Adam28	Mus musculus (Mouse)	SUBCELLULAR LOCATION: Membrane; Single-pass type I membrane protein.	COFACTOR: Name=Zn(2+); Xref=ChEBI:CHEBI:29105; Evidence={ECO:0000250}; ; Note=Binds 1 zinc ion per subunit. {ECO:0000250};	METAL 171 171 Zinc; in inhibited form. {ECO:0000250}.; METAL 342 342 Zinc; catalytic. {ECO:0000250}.; METAL 346 346 Zinc; catalytic. {ECO:0000250}.; METAL 352 352 Zinc; catalytic. {ECO:0000250}.	Q9JLN6;
Q9UKF2	3.4.24.-		Disintegrin and metalloproteinase domain-containing protein 30 (ADAM 30) (EC 3.4.24.-)	ADAM30 UNQ2509/PRO5997	Homo sapiens (Human)	SUBCELLULAR LOCATION: Membrane; Single-pass type I membrane protein.	COFACTOR: Name=Zn(2+); Xref=ChEBI:CHEBI:29105; Evidence={ECO:0000250}; ; Note=Binds 1 zinc ion per subunit. {ECO:0000250};	METAL 172 172 Zinc; in inhibited form. {ECO:0000250}.; METAL 338 338 Zinc; catalytic. {ECO:0000255|PROSITE-ProRule:PRU00276}.; METAL 342 342 Zinc; catalytic. {ECO:0000255|PROSITE-ProRule:PRU00276}.; METAL 348 348 Zinc; catalytic. {ECO:0000255|PROSITE-ProRule:PRU00276}.	Q9UKF2;
Q9BZ11	3.4.24.-		Disintegrin and metalloproteinase domain-containing protein 33 (ADAM 33) (EC 3.4.24.-)	ADAM33 C20orf153 UNQ873/PRO1891	Homo sapiens (Human)	SUBCELLULAR LOCATION: Membrane; Single-pass type I membrane protein.	COFACTOR: Name=Zn(2+); Xref=ChEBI:CHEBI:29105; Evidence={ECO:0000250}; ; Note=Binds 1 zinc ion per subunit. {ECO:0000250};	METAL 133 133 Zinc; in inhibited form. {ECO:0000250}.; METAL 345 345 Zinc; catalytic.; METAL 349 349 Zinc; catalytic.; METAL 355 355 Zinc; catalytic.	Q9BZ11;
Q923W9	3.4.24.-		Disintegrin and metalloproteinase domain-containing protein 33 (ADAM 33) (EC 3.4.24.-)	Adam33	Mus musculus (Mouse)	SUBCELLULAR LOCATION: Membrane; Single-pass type I membrane protein.	COFACTOR: Name=Zn(2+); Xref=ChEBI:CHEBI:29105; Evidence={ECO:0000250}; ; Note=Binds 1 zinc ion per subunit. {ECO:0000250};	METAL 134 134 Zinc; in inhibited form. {ECO:0000250}.; METAL 346 346 Zinc; catalytic. {ECO:0000250}.; METAL 350 350 Zinc; catalytic. {ECO:0000250}.; METAL 356 356 Zinc; catalytic. {ECO:0000250}.	Q923W9;
P70505	3.4.24.-		Disintegrin and metalloproteinase domain-containing protein 1 (ADAM 1) (EC 3.4.24.-) (Fertilin subunit alpha)	Adam1 Adam1a Ftna	Rattus norvegicus (Rat)	SUBCELLULAR LOCATION: Membrane {ECO:0000305}; Single-pass type I membrane protein {ECO:0000305}.		METAL 373 373 Zinc; catalytic. {ECO:0000250}.; METAL 377 377 Zinc; catalytic. {ECO:0000250}.; METAL 383 383 Zinc; catalytic. {ECO:0000250}.	P70505;
P78325	3.4.24.-		Disintegrin and metalloproteinase domain-containing protein 8 (ADAM 8) (EC 3.4.24.-) (Cell surface antigen MS2) (CD antigen CD156a)	ADAM8 MS2	Homo sapiens (Human)	SUBCELLULAR LOCATION: Membrane; Single-pass type I membrane protein.	COFACTOR: Name=Zn(2+); Xref=ChEBI:CHEBI:29105; ; Note=Binds 1 zinc ion per subunit.;	METAL 334 334 Zinc; catalytic.; METAL 338 338 Zinc; catalytic.; METAL 344 344 Zinc; catalytic.	P78325;
Q05910	3.4.24.-		Disintegrin and metalloproteinase domain-containing protein 8 (ADAM 8) (EC 3.4.24.-) (Cell surface antigen MS2) (Macrophage cysteine-rich glycoprotein) (CD antigen CD156a)	Adam8 Ms2	Mus musculus (Mouse)	SUBCELLULAR LOCATION: Membrane; Single-pass type I membrane protein.	COFACTOR: Name=Zn(2+); Xref=ChEBI:CHEBI:29105; Evidence={ECO:0000305}; ; Note=Binds 1 zinc ion per subunit. {ECO:0000305};	METAL 329 329 Zinc; catalytic. {ECO:0000250}.; METAL 333 333 Zinc; catalytic. {ECO:0000250}.; METAL 339 339 Zinc; catalytic. {ECO:0000250}.	Q05910;
Q13443	3.4.24.-		Disintegrin and metalloproteinase domain-containing protein 9 (ADAM 9) (EC 3.4.24.-) (Cellular disintegrin-related protein) (Meltrin-gamma) (Metalloprotease/disintegrin/cysteine-rich protein 9) (Myeloma cell metalloproteinase)	ADAM9 KIAA0021 MCMP MDC9 MLTNG	Homo sapiens (Human)	SUBCELLULAR LOCATION: Isoform 1: Cell membrane; Single-pass type I membrane protein.; SUBCELLULAR LOCATION: Isoform 2: Secreted.	COFACTOR: Name=Zn(2+); Xref=ChEBI:CHEBI:29105; Evidence={ECO:0000305}; ; Note=Binds 1 zinc ion per subunit. {ECO:0000305};	METAL 347 347 Zinc; catalytic. {ECO:0000250}.; METAL 351 351 Zinc; catalytic. {ECO:0000250}.; METAL 357 357 Zinc; catalytic. {ECO:0000250}.	Q13443;
Q61072	3.4.24.-		Disintegrin and metalloproteinase domain-containing protein 9 (ADAM 9) (EC 3.4.24.-) (Meltrin-gamma) (Metalloprotease/disintegrin/cysteine-rich protein 9) (Myeloma cell metalloproteinase)	Adam9 Kiaa0021 Mdc9 Mltng	Mus musculus (Mouse)	SUBCELLULAR LOCATION: Membrane {ECO:0000305}; Single-pass type I membrane protein {ECO:0000305}.	COFACTOR: Name=Zn(2+); Xref=ChEBI:CHEBI:29105; Evidence={ECO:0000305}; ; Note=Binds 1 zinc ion per subunit. {ECO:0000305};	METAL 347 347 Zinc; catalytic. {ECO:0000250}.; METAL 351 351 Zinc; catalytic. {ECO:0000250}.; METAL 357 357 Zinc; catalytic. {ECO:0000250}.	Q61072;
Q7Z695	2.7.11.-	BINDING 311 311 ATP. {ECO:0000250}.	Uncharacterized aarF domain-containing protein kinase 2 (EC 2.7.11.-)	ADCK2 AARF	Homo sapiens (Human)	SUBCELLULAR LOCATION: Membrane {ECO:0000305}; Single-pass membrane protein {ECO:0000305}.			Q7Z695;
Q6NSR3	2.7.11.-	BINDING 302 302 ATP. {ECO:0000250}.	Uncharacterized aarF domain-containing protein kinase 2 (EC 2.7.11.-)	Adck2	Mus musculus (Mouse)	SUBCELLULAR LOCATION: Membrane {ECO:0000305}; Single-pass membrane protein {ECO:0000305}.			Q6NSR3;
A3QJU3	2.7.11.-		AarF domain-containing protein kinase 4 (EC 2.7.11.-)	adck4	Danio rerio (Zebrafish) (Brachydanio rerio)	SUBCELLULAR LOCATION: Mitochondrion membrane {ECO:0000250}; Single-pass membrane protein {ECO:0000250}. Cytoplasm, cytosol {ECO:0000250}. Cell membrane {ECO:0000250}.
Q96D53	2.7.11.-		AarF domain-containing protein kinase 4 (EC 2.7.11.-)	ADCK4	Homo sapiens (Human)	SUBCELLULAR LOCATION: Mitochondrion membrane {ECO:0000269|PubMed:24270420}; Single-pass membrane protein {ECO:0000269|PubMed:24270420}. Cytoplasm, cytosol {ECO:0000269|PubMed:24270420}. Cell membrane {ECO:0000269|PubMed:24270420}.			Q96D53;
Q566J8	2.7.11.-		AarF domain-containing protein kinase 4 (EC 2.7.11.-)	Adck4	Mus musculus (Mouse)	SUBCELLULAR LOCATION: Mitochondrion membrane {ECO:0000250}; Single-pass membrane protein {ECO:0000250}. Cytoplasm {ECO:0000250}. Cell membrane {ECO:0000250}. Note=In podocytes, may localize at ruffles and foot processes. {ECO:0000250}.			Q566J8;
Q6AY19	2.7.11.-		AarF domain-containing protein kinase 4 (EC 2.7.11.-)	Adck4	Rattus norvegicus (Rat)	SUBCELLULAR LOCATION: Mitochondrion membrane {ECO:0000269|PubMed:24270420}; Single-pass membrane protein {ECO:0000269|PubMed:24270420}. Cytoplasm {ECO:0000269|PubMed:24270420}. Cell membrane {ECO:0000250}. Note=In podocytes, may localize at ruffles and foot processes. {ECO:0000250}.			Q6AY19;
Q3MIX3	2.7.11.-		Uncharacterized aarF domain-containing protein kinase 5 (EC 2.7.11.-)	ADCK5	Homo sapiens (Human)	SUBCELLULAR LOCATION: Membrane {ECO:0000305}; Single-pass membrane protein {ECO:0000305}.			Q3MIX3;
Q80V03	2.7.11.-		Uncharacterized aarF domain-containing protein kinase 5 (EC 2.7.11.-)	Adck5	Mus musculus (Mouse)	SUBCELLULAR LOCATION: Membrane {ECO:0000305}; Single-pass membrane protein {ECO:0000305}.			Q80V03;
Q5VUY2	3.1.1.-		Arylacetamide deacetylase-like 4 (EC 3.1.1.-)	AADACL4	Homo sapiens (Human)	SUBCELLULAR LOCATION: Membrane {ECO:0000305}; Single-pass type II membrane protein {ECO:0000305}.			Q5VUY2;
Q8BM81	3.1.1.-		Arylacetamide deacetylase-like 4 (EC 3.1.1.-)	Aadacl4	Mus musculus (Mouse)	SUBCELLULAR LOCATION: Membrane {ECO:0000305}; Single-pass membrane protein {ECO:0000305}.			Q8BM81;
Q60813	3.4.24.-		Disintegrin and metalloproteinase domain-containing protein 1a (ADAM 1a) (EC 3.4.24.-) (Fertilin subunit alpha-a)	Adam1a Adam1 Ftna	Mus musculus (Mouse)	SUBCELLULAR LOCATION: Membrane {ECO:0000305}; Single-pass type I membrane protein {ECO:0000305}.		METAL 370 370 Zinc; catalytic. {ECO:0000250}.; METAL 374 374 Zinc; catalytic. {ECO:0000250}.; METAL 380 380 Zinc; catalytic. {ECO:0000250}.	Q60813;
Q8R534	3.4.24.-		Disintegrin and metalloproteinase domain-containing protein 1b (ADAM 1b) (EC 3.4.24.-) (Fertilin subunit alpha-b)	Adam1b	Mus musculus (Mouse)	SUBCELLULAR LOCATION: Membrane {ECO:0000305}; Single-pass type I membrane protein {ECO:0000305}.		METAL 338 338 Zinc; catalytic. {ECO:0000250}.; METAL 342 342 Zinc; catalytic. {ECO:0000250}.; METAL 348 348 Zinc; catalytic. {ECO:0000250}.	Q8R534;
D4B1G0	3.4.24.-		Disintegrin and metalloproteinase domain-containing protein B (ADAM B) (EC 3.4.24.-)	ADM-B ARB_02289	Arthroderma benhamiae (strain ATCC MYA-4681 / CBS 112371) (Trichophyton mentagrophytes)	SUBCELLULAR LOCATION: Membrane; Single-pass type I membrane protein.	COFACTOR: Name=Zn(2+); Xref=ChEBI:CHEBI:29105; Evidence={ECO:0000250}; ; Note=Binds 1 zinc ion per subunit. {ECO:0000250};	METAL 432 432 Zinc; catalytic. {ECO:0000255|PROSITE-ProRule:PRU00276}.; METAL 436 436 Zinc; catalytic. {ECO:0000255|PROSITE-ProRule:PRU00276}.; METAL 442 442 Zinc; catalytic. {ECO:0000255|PROSITE-ProRule:PRU00276}.	D4B1G0;
C5FUK3	3.4.24.-		Disintegrin and metalloproteinase domain-containing protein B (ADAM B) (EC 3.4.24.-)	ADM-B MCYG_06406	Arthroderma otae (strain ATCC MYA-4605 / CBS 113480) (Microsporum canis)	SUBCELLULAR LOCATION: Membrane; Single-pass type I membrane protein.	COFACTOR: Name=Zn(2+); Xref=ChEBI:CHEBI:29105; Evidence={ECO:0000250}; ; Note=Binds 1 zinc ion per subunit. {ECO:0000250};	METAL 431 431 Zinc; catalytic. {ECO:0000255|PROSITE-ProRule:PRU00276}.; METAL 435 435 Zinc; catalytic. {ECO:0000255|PROSITE-ProRule:PRU00276}.; METAL 441 441 Zinc; catalytic. {ECO:0000255|PROSITE-ProRule:PRU00276}.	C5FUK3;
Q4WQ08	3.4.24.-		Disintegrin and metalloproteinase domain-containing protein B (ADAM B) (EC 3.4.24.-)	ADM-B AFUA_4G11150	Neosartorya fumigata (strain ATCC MYA-4609 / Af293 / CBS 101355 / FGSC A1100) (Aspergillus fumigatus)	SUBCELLULAR LOCATION: Membrane; Single-pass type I membrane protein.	COFACTOR: Name=Zn(2+); Xref=ChEBI:CHEBI:29105; Evidence={ECO:0000250}; ; Note=Binds 1 zinc ion per subunit. {ECO:0000250};	METAL 429 429 Zinc; catalytic. {ECO:0000255|PROSITE-ProRule:PRU00276}.; METAL 433 433 Zinc; catalytic. {ECO:0000255|PROSITE-ProRule:PRU00276}.; METAL 439 439 Zinc; catalytic. {ECO:0000255|PROSITE-ProRule:PRU00276}.	Q4WQ08;
D4DCV9	3.4.24.-		Disintegrin and metalloproteinase domain-containing protein B (ADAM B) (EC 3.4.24.-)	ADM-B TRV_04965	Trichophyton verrucosum (strain HKI 0517)	SUBCELLULAR LOCATION: Membrane; Single-pass type I membrane protein.	COFACTOR: Name=Zn(2+); Xref=ChEBI:CHEBI:29105; Evidence={ECO:0000250}; ; Note=Binds 1 zinc ion per subunit. {ECO:0000250};	METAL 431 431 Zinc; catalytic. {ECO:0000255|PROSITE-ProRule:PRU00276}.; METAL 435 435 Zinc; catalytic. {ECO:0000255|PROSITE-ProRule:PRU00276}.; METAL 441 441 Zinc; catalytic. {ECO:0000255|PROSITE-ProRule:PRU00276}.	D4DCV9;
D4GYH3	2.4.1.-		Glycosyltransferase AglG (EC 2.4.1.-) (Archaeal glycosylation protein G)	aglG HVO_1529	Haloferax volcanii (strain ATCC 29605 / DSM 3757 / JCM 8879 / NBRC 14742 / NCIMB 2012 / VKM B-1768 / DS2) (Halobacterium volcanii)	SUBCELLULAR LOCATION: Cell membrane {ECO:0000305}; Single-pass membrane protein {ECO:0000305}.			D4GYH3;
D4GYH2	2.4.1.-		Glycosyltransferase AglI (EC 2.4.1.-) (Archaeal glycosylation protein I)	aglI HVO_1528	Haloferax volcanii (strain ATCC 29605 / DSM 3757 / JCM 8879 / NBRC 14742 / NCIMB 2012 / VKM B-1768 / DS2) (Halobacterium volcanii)	SUBCELLULAR LOCATION: Cell membrane {ECO:0000305}; Single-pass membrane protein {ECO:0000305}.			D4GYH2;
P52923	1.-.-.-	BINDING 51 51 FAD. {ECO:0000255}.; BINDING 56 56 FAD. {ECO:0000255}.; BINDING 283 283 FAD. {ECO:0000255}.	Apoptosis-inducing factor 1 (EC 1.-.-.-) (Cercosporin and photosensitizer-detoxification protein 1)	AIF1 CPD1 YNR074C N3815	Saccharomyces cerevisiae (strain ATCC 204508 / S288c) (Baker's yeast)	SUBCELLULAR LOCATION: Mitochondrion outer membrane {ECO:0000250}; Single-pass membrane protein {ECO:0000250}. Nucleus {ECO:0000269|PubMed:15381687}. Note=Translocates from mitochondrion to the nucleus upon apoptosis induction.	COFACTOR: Name=FAD; Xref=ChEBI:CHEBI:57692; Evidence={ECO:0000250};		P52923;
P51648	1.2.1.3		Fatty aldehyde dehydrogenase (EC 1.2.1.3) (Aldehyde dehydrogenase 10) (Aldehyde dehydrogenase family 3 member A2) (Microsomal aldehyde dehydrogenase)	ALDH3A2 ALDH10 FALDH	Homo sapiens (Human)	SUBCELLULAR LOCATION: Endoplasmic reticulum membrane; Single-pass membrane protein; Cytoplasmic side.			P51648;
Q60HH8	1.2.1.3		Fatty aldehyde dehydrogenase (EC 1.2.1.3) (Aldehyde dehydrogenase family 3 member A2)	ALDH3A2 QccE-15682	Macaca fascicularis (Crab-eating macaque) (Cynomolgus monkey)	SUBCELLULAR LOCATION: Endoplasmic reticulum membrane {ECO:0000250}; Single-pass membrane protein {ECO:0000250}; Cytoplasmic side {ECO:0000250}.			Q60HH8;
P47740	1.2.1.3		Fatty aldehyde dehydrogenase (EC 1.2.1.3) (Aldehyde dehydrogenase 3) (Aldehyde dehydrogenase family 3 member A2)	Aldh3a2 Ahd-3 Ahd3 Aldh3 Aldh4	Mus musculus (Mouse)	SUBCELLULAR LOCATION: Endoplasmic reticulum membrane; Single-pass membrane protein; Cytoplasmic side.			P47740;
Q5RF60	1.2.1.3		Fatty aldehyde dehydrogenase (EC 1.2.1.3) (Aldehyde dehydrogenase family 3 member A2)	ALDH3A2	Pongo abelii (Sumatran orangutan) (Pongo pygmaeus abelii)	SUBCELLULAR LOCATION: Endoplasmic reticulum membrane {ECO:0000250}; Single-pass membrane protein {ECO:0000250}; Cytoplasmic side {ECO:0000250}.			Q5RF60;
P30839	1.2.1.3		Fatty aldehyde dehydrogenase (EC 1.2.1.3) (Aldehyde dehydrogenase 4) (Aldehyde dehydrogenase family 3 member A2) (Microsomal aldehyde dehydrogenase) (msALDH)	Aldh3a2 Aldh4	Rattus norvegicus (Rat)	SUBCELLULAR LOCATION: Endoplasmic reticulum membrane; Single-pass membrane protein; Cytoplasmic side.			P30839;
Q8RWW0	2.7.11.1	BINDING 377 377 ATP. {ECO:0000255|PROSITE-ProRule:PRU00159}.	Receptor-like serine/threonine-protein kinase ALE2 (EC 2.7.11.1) (Protein ABNORMAL LEAF SHAPE 2)	ALE2 At2g20300 F11A3.15	Arabidopsis thaliana (Mouse-ear cress)	SUBCELLULAR LOCATION: Cell membrane {ECO:0000250}; Single-pass type I membrane protein {ECO:0000250}.			Q8RWW0;
Q75B12	2.4.1.131		GDP-Man:Man(3)GlcNAc(2)-PP-Dol alpha-1,2-mannosyltransferase (EC 2.4.1.131) (Alpha-1,2-mannosyltransferase ALG11) (Asparagine-linked glycosylation protein 11) (Glycolipid 2-alpha-mannosyltransferase)	ALG11 ADL235W	Ashbya gossypii (strain ATCC 10895 / CBS 109.51 / FGSC 9923 / NRRL Y-1056) (Yeast) (Eremothecium gossypii)	SUBCELLULAR LOCATION: Endoplasmic reticulum membrane {ECO:0000250}; Single-pass type II membrane protein {ECO:0000250}.			Q75B12;
Q6FWD1	2.4.1.131		GDP-Man:Man(3)GlcNAc(2)-PP-Dol alpha-1,2-mannosyltransferase (EC 2.4.1.131) (Alpha-1,2-mannosyltransferase ALG11) (Asparagine-linked glycosylation protein 11) (Glycolipid 2-alpha-mannosyltransferase)	ALG11 CAGL0D01122g	Candida glabrata (strain ATCC 2001 / CBS 138 / JCM 3761 / NBRC 0622 / NRRL Y-65) (Yeast) (Torulopsis glabrata)	SUBCELLULAR LOCATION: Endoplasmic reticulum membrane {ECO:0000250}; Single-pass type II membrane protein {ECO:0000250}.			Q6FWD1;
Q8X092	2.4.1.131		GDP-Man:Man(3)GlcNAc(2)-PP-Dol alpha-1,2-mannosyltransferase (EC 2.4.1.131) (Alpha-1,2-mannosyltransferase alg-11) (Asparagine-linked glycosylation protein 11) (Glycolipid 2-alpha-mannosyltransferase)	alg-11 B14D6.360 NCU06779	Neurospora crassa (strain ATCC 24698 / 74-OR23-1A / CBS 708.71 / DSM 1257 / FGSC 987)	SUBCELLULAR LOCATION: Endoplasmic reticulum membrane {ECO:0000250}; Single-pass type II membrane protein {ECO:0000250}.			Q8X092;
O74878	2.4.1.131		GDP-Man:Man(3)GlcNAc(2)-PP-Dol alpha-1,2-mannosyltransferase (EC 2.4.1.131) (Alpha-1,2-mannosyltransferase alg11) (Asparagine-linked glycosylation protein 11) (Galactomannan deficiency protein 3) (Glycolipid 2-alpha-mannosyltransferase)	alg11 gmd3 SPCC330.08	Schizosaccharomyces pombe (strain 972 / ATCC 24843) (Fission yeast)	SUBCELLULAR LOCATION: Endoplasmic reticulum membrane {ECO:0000250}; Single-pass type II membrane protein {ECO:0000250}.			O74878;
P53954	2.4.1.131		GDP-Man:Man(3)GlcNAc(2)-PP-Dol alpha-1,2-mannosyltransferase (EC 2.4.1.131) (Alpha-1,2-mannosyltransferase ALG11) (Asparagine-linked glycosylation protein 11) (Glycolipid 2-alpha-mannosyltransferase)	ALG11 YNL048W N2510 YNL2510W	Saccharomyces cerevisiae (strain ATCC 204508 / S288c) (Baker's yeast)	SUBCELLULAR LOCATION: Endoplasmic reticulum membrane {ECO:0000269|PubMed:11278778}; Single-pass type II membrane protein {ECO:0000269|PubMed:11278778}.			P53954;
Q75BA5	2.4.1.142		Chitobiosyldiphosphodolichol beta-mannosyltransferase (EC 2.4.1.142) (Asparagine-linked glycosylation protein 1) (Beta-1,4-mannosyltransferase) (GDP-Man:GlcNAc2-PP-dolichol mannosyltransferase) (GDP-mannose-dolichol diphosphochitobiose mannosyltransferase)	ALG1 ADL338C	Ashbya gossypii (strain ATCC 10895 / CBS 109.51 / FGSC 9923 / NRRL Y-1056) (Yeast) (Eremothecium gossypii)	SUBCELLULAR LOCATION: Endoplasmic reticulum membrane {ECO:0000250}; Single-pass type II membrane protein {ECO:0000250}.
Q59Q79	2.4.1.142		Chitobiosyldiphosphodolichol beta-mannosyltransferase (EC 2.4.1.142) (Asparagine-linked glycosylation protein 1) (Beta-1,4-mannosyltransferase) (GDP-Man:GlcNAc2-PP-dolichol mannosyltransferase) (GDP-mannose-dolichol diphosphochitobiose mannosyltransferase)	ALG1 CaO19.11888 CaO19.4410	Candida albicans (strain SC5314 / ATCC MYA-2876) (Yeast)	SUBCELLULAR LOCATION: Endoplasmic reticulum membrane {ECO:0000250}; Single-pass type II membrane protein {ECO:0000250}.			Q59Q79;
Q6FLZ2	2.4.1.142		Chitobiosyldiphosphodolichol beta-mannosyltransferase (EC 2.4.1.142) (Asparagine-linked glycosylation protein 1) (Beta-1,4-mannosyltransferase) (GDP-Man:GlcNAc2-PP-dolichol mannosyltransferase) (GDP-mannose-dolichol diphosphochitobiose mannosyltransferase)	ALG1 CAGL0K12342g	Candida glabrata (strain ATCC 2001 / CBS 138 / JCM 3761 / NBRC 0622 / NRRL Y-65) (Yeast) (Torulopsis glabrata)	SUBCELLULAR LOCATION: Endoplasmic reticulum membrane {ECO:0000250}; Single-pass type II membrane protein {ECO:0000250}.			Q6FLZ2;
P90522	2.4.1.142		Chitobiosyldiphosphodolichol beta-mannosyltransferase (EC 2.4.1.142) (Asparagine-linked glycosylation protein 1 homolog) (Beta-1,4-mannosyltransferase) (GDP-Man:GlcNAc2-PP-dolichol mannosyltransferase) (GDP-mannose-dolichol diphosphochitobiose mannosyltransferase)	alg1 mntA DDB_G0286011	Dictyostelium discoideum (Slime mold)	SUBCELLULAR LOCATION: Endoplasmic reticulum membrane {ECO:0000250}; Single-pass type II membrane protein {ECO:0000250}.			P90522;
Q9BT22	2.4.1.142		Chitobiosyldiphosphodolichol beta-mannosyltransferase (EC 2.4.1.142) (Asparagine-linked glycosylation protein 1 homolog) (Beta-1,4-mannosyltransferase) (GDP-Man:GlcNAc2-PP-dolichol mannosyltransferase) (GDP-mannose-dolichol diphosphochitobiose mannosyltransferase) (Mannosyltransferase-1) (MT-1) (hMat-1)	ALG1 HMAT1 HMT1 PSEC0061 UNQ861/PRO1870	Homo sapiens (Human)	SUBCELLULAR LOCATION: Endoplasmic reticulum membrane {ECO:0000305}; Single-pass type II membrane protein {ECO:0000305}.			Q9BT22;
Q6CVU2	2.4.1.142		Chitobiosyldiphosphodolichol beta-mannosyltransferase (EC 2.4.1.142) (Asparagine-linked glycosylation protein 1) (Beta-1,4-mannosyltransferase) (GDP-Man:GlcNAc2-PP-dolichol mannosyltransferase) (GDP-mannose-dolichol diphosphochitobiose mannosyltransferase)	ALG1 KLLA0B09405g	Kluyveromyces lactis (strain ATCC 8585 / CBS 2359 / DSM 70799 / NBRC 1267 / NRRL Y-1140 / WM37) (Yeast) (Candida sphaerica)	SUBCELLULAR LOCATION: Endoplasmic reticulum membrane {ECO:0000250}; Single-pass type II membrane protein {ECO:0000250}.			Q6CVU2;
Q921Q3	2.4.1.142		Chitobiosyldiphosphodolichol beta-mannosyltransferase (EC 2.4.1.142) (Asparagine-linked glycosylation protein 1 homolog) (Beta-1,4-mannosyltransferase) (GDP-Man:GlcNAc2-PP-dolichol mannosyltransferase) (GDP-mannose-dolichol diphosphochitobiose mannosyltransferase)	Alg1	Mus musculus (Mouse)	SUBCELLULAR LOCATION: Endoplasmic reticulum membrane {ECO:0000250}; Single-pass type II membrane protein {ECO:0000250}.			Q921Q3;
Q5R7A2	2.4.1.142		Chitobiosyldiphosphodolichol beta-mannosyltransferase (EC 2.4.1.142) (Asparagine-linked glycosylation protein 1 homolog) (Beta-1,4-mannosyltransferase) (GDP-Man:GlcNAc2-PP-dolichol mannosyltransferase) (GDP-mannose-dolichol diphosphochitobiose mannosyltransferase)	ALG1	Pongo abelii (Sumatran orangutan) (Pongo pygmaeus abelii)	SUBCELLULAR LOCATION: Endoplasmic reticulum membrane {ECO:0000250}; Single-pass type II membrane protein {ECO:0000250}.			Q5R7A2;
O13933	2.4.1.142		Chitobiosyldiphosphodolichol beta-mannosyltransferase (EC 2.4.1.142) (Asparagine-linked glycosylation protein 1) (Beta-1,4-mannosyltransferase) (GDP-Man:GlcNAc2-PP-dolichol mannosyltransferase) (GDP-mannose-dolichol diphosphochitobiose mannosyltransferase)	alg1 SPAC23C4.14	Schizosaccharomyces pombe (strain 972 / ATCC 24843) (Fission yeast)	SUBCELLULAR LOCATION: Endoplasmic reticulum membrane {ECO:0000250}; Single-pass type II membrane protein {ECO:0000250}.			O13933;
P16661	2.4.1.142		Chitobiosyldiphosphodolichol beta-mannosyltransferase (EC 2.4.1.142) (Asparagine-linked glycosylation protein 1) (Beta-1,4-mannosyltransferase) (GDP-Man:GlcNAc2-PP-dolichol mannosyltransferase) (GDP-mannose-dolichol diphosphochitobiose mannosyltransferase)	ALG1 YBR110W YBR0906	Saccharomyces cerevisiae (strain ATCC 204508 / S288c) (Baker's yeast)	SUBCELLULAR LOCATION: Endoplasmic reticulum membrane {ECO:0000305}; Single-pass type II membrane protein {ECO:0000305}.			P16661;
Q59LF2	2.4.1.132; 2.4.1.257		Alpha-1,3/1,6-mannosyltransferase ALG2 (EC 2.4.1.132) (EC 2.4.1.257) (Asparagine-linked glycosylation protein 2) (GDP-Man:Man(1)GlcNAc(2)-PP-Dol alpha-1,3-mannosyltransferase) (GDP-Man:Man(1)GlcNAc(2)-PP-dolichol mannosyltransferase) (GDP-Man:Man(2)GlcNAc(2)-PP-Dol alpha-1,6-mannosyltransferase)	ALG2 CaO19.1221 CaO19.8808	Candida albicans (strain SC5314 / ATCC MYA-2876) (Yeast)	SUBCELLULAR LOCATION: Endoplasmic reticulum membrane {ECO:0000250}; Single-pass membrane protein {ECO:0000250}.			Q59LF2;
Q6FJJ9	2.4.1.132; 2.4.1.257		Alpha-1,3/1,6-mannosyltransferase ALG2 (EC 2.4.1.132) (EC 2.4.1.257) (Asparagine-linked glycosylation protein 2) (GDP-Man:Man(1)GlcNAc(2)-PP-Dol alpha-1,3-mannosyltransferase) (GDP-Man:Man(1)GlcNAc(2)-PP-dolichol mannosyltransferase) (GDP-Man:Man(2)GlcNAc(2)-PP-Dol alpha-1,6-mannosyltransferase)	ALG2 CAGL0M05731g	Candida glabrata (strain ATCC 2001 / CBS 138 / JCM 3761 / NBRC 0622 / NRRL Y-65) (Yeast) (Torulopsis glabrata)	SUBCELLULAR LOCATION: Endoplasmic reticulum membrane {ECO:0000250}; Single-pass membrane protein {ECO:0000250}.			Q6FJJ9;
Q7KWM5	2.4.1.132; 2.4.1.257		Alpha-1,3/1,6-mannosyltransferase ALG2 (EC 2.4.1.132) (EC 2.4.1.257) (Asparagine-linked glycosylation protein 2 homolog) (GDP-Man:Man(1)GlcNAc(2)-PP-Dol alpha-1,3-mannosyltransferase) (GDP-Man:Man(1)GlcNAc(2)-PP-dolichol mannosyltransferase) (GDP-Man:Man(2)GlcNAc(2)-PP-Dol alpha-1,6-mannosyltransferase)	alg2 DDB_G0272730	Dictyostelium discoideum (Slime mold)	SUBCELLULAR LOCATION: Membrane {ECO:0000305}; Single-pass membrane protein {ECO:0000305}.			Q7KWM5;
Q9H553	2.4.1.132; 2.4.1.257		Alpha-1,3/1,6-mannosyltransferase ALG2 (EC 2.4.1.132) (EC 2.4.1.257) (Asparagine-linked glycosylation protein 2 homolog) (GDP-Man:Man(1)GlcNAc(2)-PP-Dol alpha-1,3-mannosyltransferase) (GDP-Man:Man(1)GlcNAc(2)-PP-dolichol mannosyltransferase) (GDP-Man:Man(2)GlcNAc(2)-PP-Dol alpha-1,6-mannosyltransferase)	ALG2 UNQ666/PRO1298	Homo sapiens (Human)	SUBCELLULAR LOCATION: Membrane {ECO:0000305}; Single-pass membrane protein {ECO:0000305}.			Q9H553;
Q9DBE8	2.4.1.132; 2.4.1.257		Alpha-1,3/1,6-mannosyltransferase ALG2 (EC 2.4.1.132) (EC 2.4.1.257) (Asparagine-linked glycosylation protein 2 homolog) (GDP-Man:Man(1)GlcNAc(2)-PP-Dol alpha-1,3-mannosyltransferase) (GDP-Man:Man(1)GlcNAc(2)-PP-dolichol mannosyltransferase) (GDP-Man:Man(2)GlcNAc(2)-PP-Dol alpha-1,6-mannosyltransferase)	Alg2 MNCb-5081	Mus musculus (Mouse)	SUBCELLULAR LOCATION: Membrane {ECO:0000305}; Single-pass membrane protein {ECO:0000305}.			Q9DBE8;
Q8X0H8	2.4.1.132; 2.4.1.257		Alpha-1,3/1,6-mannosyltransferase alg-2 (EC 2.4.1.132) (EC 2.4.1.257) (Asparagine-linked glycosylation protein 2) (GDP-Man:Man(1)GlcNAc(2)-PP-Dol alpha-1,3-mannosyltransferase) (GDP-Man:Man(1)GlcNAc(2)-PP-dolichol mannosyltransferase) (GDP-Man:Man(2)GlcNAc(2)-PP-Dol alpha-1,6-mannosyltransferase)	alg-2 B12N19.090 NCU03503	Neurospora crassa (strain ATCC 24698 / 74-OR23-1A / CBS 708.71 / DSM 1257 / FGSC 987)	SUBCELLULAR LOCATION: Endoplasmic reticulum membrane {ECO:0000250}; Single-pass membrane protein {ECO:0000250}.			Q8X0H8;
Q6C3V7	2.4.1.132; 2.4.1.257		Alpha-1,3/1,6-mannosyltransferase ALG2 (EC 2.4.1.132) (EC 2.4.1.257) (Asparagine-linked glycosylation protein 2) (GDP-Man:Man(1)GlcNAc(2)-PP-Dol alpha-1,3-mannosyltransferase) (GDP-Man:Man(1)GlcNAc(2)-PP-dolichol mannosyltransferase) (GDP-Man:Man(2)GlcNAc(2)-PP-Dol alpha-1,6-mannosyltransferase)	ALG2 YALI0E31797g	Yarrowia lipolytica (strain CLIB 122 / E 150) (Yeast) (Candida lipolytica)	SUBCELLULAR LOCATION: Endoplasmic reticulum membrane {ECO:0000250}; Single-pass membrane protein {ECO:0000250}.			Q6C3V7;
A2DZE8	2.4.1.117		Dolichyl-phosphate beta-glucosyltransferase ALG5A (DolP-glucosyltransferase) (EC 2.4.1.117)	ALG5A TVAG_487200	Trichomonas vaginalis	SUBCELLULAR LOCATION: Endoplasmic reticulum membrane {ECO:0000250|UniProtKB:P40350}; Single-pass type II membrane protein {ECO:0000255}.			A2DZE8;
A2EK20	2.4.1.117		Dolichyl-phosphate beta-glucosyltransferase ALG5B (DolP-glucosyltransferase) (EC 2.4.1.117)	ALG5B TVAG_174740	Trichomonas vaginalis	SUBCELLULAR LOCATION: Endoplasmic reticulum membrane {ECO:0000250|UniProtKB:P40350}; Single-pass type II membrane protein {ECO:0000255}.			A2EK20;
A2ELE6	2.4.1.117		Dolichyl-phosphate beta-glucosyltransferase ALG5C (DolP-glucosyltransferase) (EC 2.4.1.117)	ALG5C TVAG_358380	Trichomonas vaginalis	SUBCELLULAR LOCATION: Endoplasmic reticulum membrane {ECO:0000250|UniProtKB:P40350}; Single-pass type II membrane protein {ECO:0000255}.			A2ELE6;
A2E3C6	2.4.1.117		Dolichyl-phosphate beta-glucosyltransferase ALG5D (DolP-glucosyltransferase) (EC 2.4.1.117)	ALG5D TVAG_221700	Trichomonas vaginalis	SUBCELLULAR LOCATION: Endoplasmic reticulum membrane {ECO:0000250|UniProtKB:P40350}; Single-pass type II membrane protein {ECO:0000255}.			A2E3C6;
A2DSR8	2.4.1.117		Dolichyl-phosphate beta-glucosyltransferase ALG5E (DolP-glucosyltransferase) (EC 2.4.1.117)	ALG5E TVAG_347770	Trichomonas vaginalis	SUBCELLULAR LOCATION: Endoplasmic reticulum membrane {ECO:0000250|UniProtKB:P40350}; Single-pass type II membrane protein {ECO:0000255}.			A2DSR8;
Q54J42	2.4.1.117		Dolichyl-phosphate beta-glucosyltransferase (DolP-glucosyltransferase) (EC 2.4.1.117) (Asparagine-linked glycosylation protein 5 homolog)	alg5 dgtA DDB_G0288321	Dictyostelium discoideum (Slime mold)	SUBCELLULAR LOCATION: Endoplasmic reticulum membrane {ECO:0000250}; Single-pass type II membrane protein {ECO:0000250}.			Q54J42;
Q9VLQ1	2.4.1.117		Dolichyl-phosphate beta-glucosyltransferase (EC 2.4.1.117) (Wollknaeuel)	wol alg5 CG7870	Drosophila melanogaster (Fruit fly)	SUBCELLULAR LOCATION: Endoplasmic reticulum membrane {ECO:0000269|PubMed:21199819}; Single-pass type II membrane protein {ECO:0000269|PubMed:21199819}.			Q9VLQ1;
Q9Y673	2.4.1.117		Dolichyl-phosphate beta-glucosyltransferase (DolP-glucosyltransferase) (EC 2.4.1.117) (Asparagine-linked glycosylation protein 5 homolog)	ALG5 HSPC149	Homo sapiens (Human)	SUBCELLULAR LOCATION: Endoplasmic reticulum membrane {ECO:0000250}; Single-pass type II membrane protein {ECO:0000250}.			Q9Y673;
Q9DB25	2.4.1.117		Dolichyl-phosphate beta-glucosyltransferase (DolP-glucosyltransferase) (EC 2.4.1.117) (Asparagine-linked glycosylation protein 5 homolog)	Alg5	Mus musculus (Mouse)	SUBCELLULAR LOCATION: Endoplasmic reticulum membrane {ECO:0000250}; Single-pass type II membrane protein {ECO:0000250}.			Q9DB25;
O60061	2.4.1.117		Dolichyl-phosphate beta-glucosyltransferase (DolP-glucosyltransferase) (EC 2.4.1.117) (Asparagine-linked glycosylation protein 5)	alg5 SPBC56F2.10c	Schizosaccharomyces pombe (strain 972 / ATCC 24843) (Fission yeast)	SUBCELLULAR LOCATION: Endoplasmic reticulum membrane {ECO:0000269|PubMed:16823372}; Single-pass type II membrane protein {ECO:0000269|PubMed:16823372}. Note=Its interaction with the substrate UDP-glucose may occur at the cytoplasmic side of the ER, whereas the steps utilizing dolichyl beta-D-glucosyl phosphate take place in the lumen of the ER. {ECO:0000250}.			O60061;
P40350	2.4.1.117		Dolichyl-phosphate beta-glucosyltransferase (DolP-glucosyltransferase) (EC 2.4.1.117) (Asparagine-linked glycosylation protein 5)	ALG5 YPL227C P1437	Saccharomyces cerevisiae (strain ATCC 204508 / S288c) (Baker's yeast)	SUBCELLULAR LOCATION: Endoplasmic reticulum membrane; Single-pass type II membrane protein. Note=Its interaction with the substrate UDP-glucose may occur at the cytoplasmic side of the ER, whereas the steps utilizing dolichyl beta-D-glucosyl phosphate take place in the lumen of the ER.			P40350;
Q9UM73	2.7.10.1	BINDING 1124 1124 ATP; via carbonyl oxygen.; BINDING 1150 1150 ATP. {ECO:0000255|PROSITE-ProRule:PRU00159}.; BINDING 1150 1150 Inhibitor. {ECO:0000269|PubMed:20695522, ECO:0000269|PubMed:21575866}.; BINDING 1199 1199 Inhibitor; via amide nitrogen. {ECO:0000269|PubMed:20695522, ECO:0000269|PubMed:21575866}.; BINDING 1203 1203 Inhibitor. {ECO:0000269|PubMed:20695522, ECO:0000269|PubMed:21575866}.; …	ALK tyrosine kinase receptor (EC 2.7.10.1) (Anaplastic lymphoma kinase) (CD antigen CD246)	ALK	Homo sapiens (Human)	SUBCELLULAR LOCATION: Cell membrane {ECO:0000269|PubMed:16317043, ECO:0000269|PubMed:9174053}; Single-pass type I membrane protein {ECO:0000269|PubMed:16317043, ECO:0000269|PubMed:9174053}. Note=Membrane attachment was crucial for promotion of neuron-like differentiation and cell proliferation arrest through specific activation of the MAP kinase pathway.			Q9UM73;
P97793	2.7.10.1	BINDING 1128 1128 ATP; via carbonyl oxygen. {ECO:0000255|PROSITE-ProRule:PRU00159}.; BINDING 1154 1154 ATP. {ECO:0000255|PROSITE-ProRule:PRU00159}.; BINDING 1154 1154 Inhibitor. {ECO:0000250}.; BINDING 1203 1203 Inhibitor; via amide nitrogen. {ECO:0000250}.; BINDING 1207 1207 Inhibitor. {ECO:0000250}.; BINDING 1214 1214 Inhibitor. {ECO:0000250}.; BINDING 1274 1274 ATP. {ECO:0000255|PROSITE-ProRul…	ALK tyrosine kinase receptor (EC 2.7.10.1) (Anaplastic lymphoma kinase) (CD antigen CD246)	Alk	Mus musculus (Mouse)	SUBCELLULAR LOCATION: Cell membrane {ECO:0000250}; Single-pass type I membrane protein {ECO:0000250}. Note=Membrane attachment was crucial for promotion of neuron-like differentiation and cell proliferation arrest through specific activation of the MAP kinase pathway. {ECO:0000250}.			P97793;
P08478	1.14.17.3; 4.3.2.5		Peptidyl-glycine alpha-amidating monooxygenase A (PAM-A) (Peptide C-terminal alpha-amidating enzyme I) (AE-I) (Peptidyl-glycine alpha-amidating monooxygenase I) [Includes: Peptidylglycine alpha-hydroxylating monooxygenase A (PHM-A) (EC 1.14.17.3); Peptidyl-alpha-hydroxyglycine alpha-amidating lyase A (EC 4.3.2.5) (Peptidylamidoglycolate lyase-A) (PAL-A)]	pam-a	Xenopus laevis (African clawed frog)	SUBCELLULAR LOCATION: Cytoplasmic vesicle, secretory vesicle membrane {ECO:0000250}; Single-pass membrane protein {ECO:0000250}. Note=Secretory granules.	COFACTOR: Name=Zn(2+); Xref=ChEBI:CHEBI:29105; Evidence={ECO:0000250}; ; Note=Zn(2+) is required for the lyase reaction. {ECO:0000250};; COFACTOR: Name=Cu(2+); Xref=ChEBI:CHEBI:29036; Evidence={ECO:0000250}; ; Note=Binds 2 copper ions per subunit for the monoxygenase reaction. {ECO:0000250};	METAL 103 103 Copper A. {ECO:0000250}.; METAL 104 104 Copper A. {ECO:0000250}.; METAL 168 168 Copper A. {ECO:0000250}.; METAL 238 238 Copper B. {ECO:0000250}.; METAL 240 240 Copper B. {ECO:0000250}.; METAL 310 310 Copper B. {ECO:0000250}.
P12890	1.14.17.3; 4.3.2.5		Peptidyl-glycine alpha-amidating monooxygenase B (PAM-B) (Peptide C-terminal alpha-amidating enzyme II) (AE-II) (Peptidyl-glycine alpha-amidating monooxygenase II) [Includes: Peptidylglycine alpha-hydroxylating monooxygenase B (PHM-B) (EC 1.14.17.3); Peptidyl-alpha-hydroxyglycine alpha-amidating lyase B (EC 4.3.2.5) (Peptidylamidoglycolate lyase-B) (PAL-B)]	pam-b	Xenopus laevis (African clawed frog)	SUBCELLULAR LOCATION: Cytoplasmic vesicle, secretory vesicle membrane {ECO:0000250}; Single-pass membrane protein {ECO:0000250}. Note=Secretory granules.	COFACTOR: Name=Zn(2+); Xref=ChEBI:CHEBI:29105; Evidence={ECO:0000250}; ; Note=Zn(2+) is required for the lyase reaction. {ECO:0000250};; COFACTOR: Name=Cu(2+); Xref=ChEBI:CHEBI:29036; Evidence={ECO:0000250}; ; Note=Binds 2 copper ions per subunit for the monoxygenase reaction. {ECO:0000250};	METAL 105 105 Copper A. {ECO:0000250}.; METAL 106 106 Copper A. {ECO:0000250}.; METAL 170 170 Copper A. {ECO:0000250}.; METAL 240 240 Copper B. {ECO:0000250}.; METAL 242 242 Copper B. {ECO:0000250}.; METAL 312 312 Copper B. {ECO:0000250}.	P12890;
P10731	1.14.17.3; 4.3.2.5		Peptidyl-glycine alpha-amidating monooxygenase (PAM) [Includes: Peptidylglycine alpha-hydroxylating monooxygenase (PHM) (EC 1.14.17.3); Peptidyl-alpha-hydroxyglycine alpha-amidating lyase (EC 4.3.2.5) (Peptidylamidoglycolate lyase) (PAL)]	PAM	Bos taurus (Bovine)	SUBCELLULAR LOCATION: Cytoplasmic vesicle, secretory vesicle membrane {ECO:0000269|PubMed:2059626}; Single-pass membrane protein {ECO:0000269|PubMed:2059626}. Note=Secretory granules.	COFACTOR: Name=Zn(2+); Xref=ChEBI:CHEBI:29105; Evidence={ECO:0000250}; ; Note=Zn(2+) is required for the lyase reaction. {ECO:0000250};; COFACTOR: Name=Cu(2+); Xref=ChEBI:CHEBI:29036; Evidence={ECO:0000250}; ; Note=Binds 2 copper ions per subunit for the monoxygenase reaction. {ECO:0000250};	METAL 102 102 Copper A. {ECO:0000250}.; METAL 103 103 Copper A. {ECO:0000250}.; METAL 167 167 Copper A. {ECO:0000250}.; METAL 237 237 Copper B. {ECO:0000250}.; METAL 239 239 Copper B. {ECO:0000250}.; METAL 309 309 Copper B. {ECO:0000250}.	P10731;
P19021	1.14.17.3; 4.3.2.5		Peptidyl-glycine alpha-amidating monooxygenase (PAM) [Includes: Peptidylglycine alpha-hydroxylating monooxygenase (PHM) (EC 1.14.17.3); Peptidyl-alpha-hydroxyglycine alpha-amidating lyase (EC 4.3.2.5) (Peptidylamidoglycolate lyase) (PAL)]	PAM	Homo sapiens (Human)	SUBCELLULAR LOCATION: Isoform 1: Membrane; Single-pass type I membrane protein.; SUBCELLULAR LOCATION: Isoform 2: Membrane; Single-pass type I membrane protein.; SUBCELLULAR LOCATION: Isoform 3: Secreted. Note=Secreted from secretory granules.; SUBCELLULAR LOCATION: Isoform 4: Secreted. Note=Secreted from secretory granules.	COFACTOR: Name=Zn(2+); Xref=ChEBI:CHEBI:29105; Evidence={ECO:0000269|PubMed:12699694}; ; Note=Zn(2+) is required for the lyase reaction. {ECO:0000269|PubMed:12699694};; COFACTOR: Name=Cu(2+); Xref=ChEBI:CHEBI:29036; Evidence={ECO:0000269|PubMed:12699694}; ; Note=Binds 2 copper ions per subunit for the monoxygenase reaction. {ECO:0000269|PubMed:12699694};	METAL 102 102 Copper A. {ECO:0000250}.; METAL 103 103 Copper A. {ECO:0000250}.; METAL 167 167 Copper A. {ECO:0000250}.; METAL 237 237 Copper B. {ECO:0000250}.; METAL 239 239 Copper B. {ECO:0000250}.; METAL 309 309 Copper B. {ECO:0000250}.	P19021;
P97467	1.14.17.3; 4.3.2.5		Peptidyl-glycine alpha-amidating monooxygenase (PAM) [Includes: Peptidylglycine alpha-hydroxylating monooxygenase (PHM) (EC 1.14.17.3); Peptidyl-alpha-hydroxyglycine alpha-amidating lyase (EC 4.3.2.5) (Peptidylamidoglycolate lyase) (PAL)]	Pam	Mus musculus (Mouse)	SUBCELLULAR LOCATION: Cytoplasmic vesicle, secretory vesicle membrane {ECO:0000250}; Single-pass membrane protein {ECO:0000250}. Note=Secretory granules.	COFACTOR: Name=Zn(2+); Xref=ChEBI:CHEBI:29105; Evidence={ECO:0000250}; ; Note=Zn(2+) is required for the lyase reaction. {ECO:0000250};; COFACTOR: Name=Cu(2+); Xref=ChEBI:CHEBI:29036; Evidence={ECO:0000250}; ; Note=Binds 2 copper ions per subunit for the monoxygenase reaction. {ECO:0000250};	METAL 106 106 Copper A. {ECO:0000250}.; METAL 107 107 Copper A. {ECO:0000250}.; METAL 171 171 Copper A. {ECO:0000250}.; METAL 241 241 Copper B. {ECO:0000250}.; METAL 243 243 Copper B. {ECO:0000250}.; METAL 313 313 Copper B. {ECO:0000250}.	P97467;
P14925	1.14.17.3; 4.3.2.5		Peptidyl-glycine alpha-amidating monooxygenase (PAM) [Includes: Peptidylglycine alpha-hydroxylating monooxygenase (PHM) (EC 1.14.17.3); Peptidyl-alpha-hydroxyglycine alpha-amidating lyase (EC 4.3.2.5) (Peptidylamidoglycolate lyase) (PAL)]	Pam	Rattus norvegicus (Rat)	SUBCELLULAR LOCATION: Cytoplasmic vesicle, secretory vesicle membrane; Single-pass membrane protein. Note=Secretory granules.	COFACTOR: Name=Zn(2+); Xref=ChEBI:CHEBI:29105; ; Note=Zn(2+) is required for the lyase reaction.;; COFACTOR: Name=Cu(2+); Xref=ChEBI:CHEBI:29036; ; Note=Binds 2 copper ions per subunit for the monoxygenase reaction.;	METAL 107 107 Copper A.; METAL 108 108 Copper A.; METAL 172 172 Copper A.; METAL 242 242 Copper B.; METAL 244 244 Copper B.; METAL 314 314 Copper B.	P14925;
Q16671	2.7.11.30	BINDING 230 230 ATP. {ECO:0000255|PROSITE-ProRule:PRU00159}.	Anti-Muellerian hormone type-2 receptor (EC 2.7.11.30) (Anti-Muellerian hormone type II receptor) (AMH type II receptor) (MIS type II receptor) (MISRII) (MRII)	AMHR2 AMHR MISR2	Homo sapiens (Human)	SUBCELLULAR LOCATION: Membrane; Single-pass type I membrane protein.	COFACTOR: Name=Mg(2+); Xref=ChEBI:CHEBI:18420; Evidence={ECO:0000250}; Name=Mn(2+); Xref=ChEBI:CHEBI:29035; Evidence={ECO:0000250};		Q16671;
Q8K592	2.7.11.30	BINDING 226 226 ATP. {ECO:0000255|PROSITE-ProRule:PRU00159}.	Anti-Muellerian hormone type-2 receptor (EC 2.7.11.30) (Anti-Muellerian hormone type II receptor) (AMH type II receptor) (MIS type II receptor) (MISRII) (MRII)	Amhr2	Mus musculus (Mouse)	SUBCELLULAR LOCATION: Membrane {ECO:0000250}; Single-pass type I membrane protein {ECO:0000250}.	COFACTOR: Name=Mg(2+); Xref=ChEBI:CHEBI:18420; Evidence={ECO:0000250}; Name=Mn(2+); Xref=ChEBI:CHEBI:29035; Evidence={ECO:0000250};		Q8K592;
Q28616	2.7.11.30	BINDING 228 228 ATP. {ECO:0000255|PROSITE-ProRule:PRU00159}.	Anti-Muellerian hormone type-2 receptor (EC 2.7.11.30) (Anti-Muellerian hormone type II receptor) (AMH type II receptor) (MIS type II receptor) (MISRII) (MRII)	AMHR2	Oryctolagus cuniculus (Rabbit)	SUBCELLULAR LOCATION: Membrane {ECO:0000250}; Single-pass type I membrane protein {ECO:0000250}.	COFACTOR: Name=Mg(2+); Xref=ChEBI:CHEBI:18420; Evidence={ECO:0000250}; Name=Mn(2+); Xref=ChEBI:CHEBI:29035; Evidence={ECO:0000250};		Q28616;
Q62893	2.7.11.30	BINDING 228 228 ATP. {ECO:0000255|PROSITE-ProRule:PRU00159}.	Anti-Muellerian hormone type-2 receptor (EC 2.7.11.30) (Anti-Muellerian hormone type II receptor) (AMH type II receptor) (C14) (MIS type II receptor) (MISRII) (MRII)	Amhr2	Rattus norvegicus (Rat)	SUBCELLULAR LOCATION: Membrane; Single-pass type I membrane protein.	COFACTOR: Name=Mg(2+); Xref=ChEBI:CHEBI:18420; Evidence={ECO:0000250}; Name=Mn(2+); Xref=ChEBI:CHEBI:29035; Evidence={ECO:0000250};		Q62893;
Q1PS23	1.14.13.158		Amorpha-4,11-diene 12-monooxygenase (EC 1.14.13.158) (Amorpha-4,11-diene C-12 oxidase) (Cytochrome P450 71AV1)	CYP71AV1	Artemisia annua (Sweet wormwood)	SUBCELLULAR LOCATION: Endoplasmic reticulum membrane {ECO:0000305}; Single-pass type II membrane protein {ECO:0000305}.	COFACTOR: Name=heme; Xref=ChEBI:CHEBI:30413; Evidence={ECO:0000250};	METAL 439 439 Iron (heme axial ligand). {ECO:0000250}.	Q1PS23;
O80452	3.5.4.6	BINDING 393 393 Substrate.; BINDING 662 662 Substrate.	AMP deaminase (AtAMPD) (EC 3.5.4.6) (Protein EMBRYONIC FACTOR 1)	AMPD FAC1 At2g38280 F16M14.21	Arabidopsis thaliana (Mouse-ear cress)	SUBCELLULAR LOCATION: Membrane {ECO:0000269|PubMed:16543243}; Single-pass membrane protein {ECO:0000269|PubMed:16543243}. Microsome membrane {ECO:0000269|PubMed:16543243}. Note=Might be associated with the inner mitochondrial membrane. {ECO:0000250}.	COFACTOR: Name=Zn(2+); Xref=ChEBI:CHEBI:29105; Evidence={ECO:0000269|PubMed:16543243}; ; Note=Binds 1 zinc ion per subunit. {ECO:0000269|PubMed:16543243};	METAL 391 391 Zinc; catalytic.; METAL 393 393 Zinc; catalytic.; METAL 659 659 Zinc; catalytic.; METAL 736 736 Zinc; catalytic.	O80452;
Q84NP7	3.5.4.6	BINDING 369 369 Substrate. {ECO:0000250}.; BINDING 638 638 Substrate. {ECO:0000250}.	Probable AMP deaminase (EC 3.5.4.6)	AMPD Os07g0693500 LOC_Os07g49270 P0034A04.129	Oryza sativa subsp. japonica (Rice)	SUBCELLULAR LOCATION: Membrane; Single-pass membrane protein. Note=Might be associated with the inner mitochondrial membrane. {ECO:0000250}.	COFACTOR: Name=Zn(2+); Xref=ChEBI:CHEBI:29105; Evidence={ECO:0000250}; ; Note=Binds 1 zinc ion per subunit. {ECO:0000250};	METAL 367 367 Zinc; catalytic. {ECO:0000250}.; METAL 369 369 Zinc; catalytic. {ECO:0000250}.; METAL 635 635 Zinc; catalytic. {ECO:0000250}.; METAL 712 712 Zinc; catalytic. {ECO:0000250}.	Q84NP7;
Q32LQ0	3.4.11.7	BINDING 225 225 Substrate. {ECO:0000250}.	Glutamyl aminopeptidase (EAP) (EC 3.4.11.7) (Aminopeptidase A) (AP-A) (CD antigen CD249)	ENPEP	Bos taurus (Bovine)	SUBCELLULAR LOCATION: Membrane {ECO:0000250}; Single-pass type II membrane protein {ECO:0000250}.	COFACTOR: Name=Zn(2+); Xref=ChEBI:CHEBI:29105; Evidence={ECO:0000250}; ; Note=Binds 1 zinc ion per subunit. {ECO:0000250};	METAL 395 395 Zinc; catalytic. {ECO:0000255|PROSITE-ProRule:PRU10095}.; METAL 399 399 Zinc; catalytic. {ECO:0000255|PROSITE-ProRule:PRU10095}.; METAL 418 418 Zinc; catalytic. {ECO:0000255|PROSITE-ProRule:PRU10095}.
Q07075	3.4.11.7	BINDING 223 223 Substrate. {ECO:0000250}.	Glutamyl aminopeptidase (EAP) (EC 3.4.11.7) (Aminopeptidase A) (AP-A) (Differentiation antigen gp160) (CD antigen CD249)	ENPEP	Homo sapiens (Human)	SUBCELLULAR LOCATION: Membrane; Single-pass type II membrane protein.	COFACTOR: Name=Zn(2+); Xref=ChEBI:CHEBI:29105; Evidence={ECO:0000250}; ; Note=Binds 1 zinc ion per subunit. {ECO:0000250};	METAL 393 393 Zinc; catalytic. {ECO:0000255|PROSITE-ProRule:PRU10095}.; METAL 397 397 Zinc; catalytic. {ECO:0000255|PROSITE-ProRule:PRU10095}.; METAL 416 416 Zinc; catalytic. {ECO:0000255|PROSITE-ProRule:PRU10095}.	Q07075;
P16406	3.4.11.7	BINDING 215 215 Substrate. {ECO:0000250}.	Glutamyl aminopeptidase (EAP) (EC 3.4.11.7) (Aminopeptidase A) (AP-A) (BP-1/6C3 antigen) (CD antigen CD249)	Enpep	Mus musculus (Mouse)	SUBCELLULAR LOCATION: Membrane; Single-pass type II membrane protein.	COFACTOR: Name=Zn(2+); Xref=ChEBI:CHEBI:29105; Evidence={ECO:0000250}; ; Note=Binds 1 zinc ion per subunit. {ECO:0000250};	METAL 385 385 Zinc; catalytic. {ECO:0000255|PROSITE-ProRule:PRU10095}.; METAL 389 389 Zinc; catalytic. {ECO:0000255|PROSITE-ProRule:PRU10095}.; METAL 408 408 Zinc; catalytic. {ECO:0000255|PROSITE-ProRule:PRU10095}.	P16406;
Q95334	3.4.11.7	BINDING 213 213 Substrate. {ECO:0000250}.	Glutamyl aminopeptidase (EAP) (EC 3.4.11.7) (Aminopeptidase A) (AP-A) (CD antigen CD249)	ENPEP	Sus scrofa (Pig)	SUBCELLULAR LOCATION: Membrane; Single-pass type II membrane protein.	COFACTOR: Name=Zn(2+); Xref=ChEBI:CHEBI:29105; Evidence={ECO:0000250}; ; Note=Binds 1 zinc ion per subunit. {ECO:0000250};	METAL 383 383 Zinc; catalytic. {ECO:0000255|PROSITE-ProRule:PRU10095}.; METAL 387 387 Zinc; catalytic. {ECO:0000255|PROSITE-ProRule:PRU10095}.; METAL 406 406 Zinc; catalytic. {ECO:0000255|PROSITE-ProRule:PRU10095}.	Q95334;
P50123	3.4.11.7	BINDING 215 215 Substrate. {ECO:0000250}.	Glutamyl aminopeptidase (EAP) (EC 3.4.11.7) (Aminopeptidase A) (AP-A) (CD antigen CD249)	Enpep	Rattus norvegicus (Rat)	SUBCELLULAR LOCATION: Membrane; Single-pass type II membrane protein.	COFACTOR: Name=Zn(2+); Xref=ChEBI:CHEBI:29105; Evidence={ECO:0000250}; ; Note=Binds 1 zinc ion per subunit. {ECO:0000250};	METAL 385 385 Zinc; catalytic. {ECO:0000255|PROSITE-ProRule:PRU10095}.; METAL 389 389 Zinc; catalytic. {ECO:0000255|PROSITE-ProRule:PRU10095}.; METAL 408 408 Zinc; catalytic. {ECO:0000255|PROSITE-ProRule:PRU10095}.	P50123;
P79098	3.4.11.2		Aminopeptidase N (AP-N) (bAPN) (EC 3.4.11.2) (Alanyl aminopeptidase) (Aminopeptidase M) (AP-M) (Microsomal aminopeptidase) (CD antigen CD13)	ANPEP APN	Bos taurus (Bovine)	SUBCELLULAR LOCATION: Membrane; Single-pass type II membrane protein.	COFACTOR: Name=Zn(2+); Xref=ChEBI:CHEBI:29105; Evidence={ECO:0000250}; ; Note=Binds 1 zinc ion per subunit. {ECO:0000250};	METAL 385 385 Zinc; catalytic. {ECO:0000255|PROSITE-ProRule:PRU10095}.; METAL 389 389 Zinc; catalytic. {ECO:0000255|PROSITE-ProRule:PRU10095}.; METAL 408 408 Zinc; catalytic. {ECO:0000255|PROSITE-ProRule:PRU10095}.	P79098;
O57579	3.4.11.2; 3.4.11.20		Aminopeptidase N (EC 3.4.11.2) (Aminopeptidase Ey) (EC 3.4.11.20)	ANPEP APDE	Gallus gallus (Chicken)	SUBCELLULAR LOCATION: Cell membrane {ECO:0000269|Ref.3}; Single-pass type II membrane protein {ECO:0000269|Ref.3}. Note=A soluble form has also been detected. {ECO:0000255, ECO:0000269|Ref.3}.	COFACTOR: Name=Zn(2+); Xref=ChEBI:CHEBI:29105; Evidence={ECO:0000269|PubMed:8288037}; ; Note=Binds 1 zinc ion per subunit. {ECO:0000269|PubMed:8288037};	METAL 386 386 Zinc; catalytic. {ECO:0000250|UniProtKB:Q10740, ECO:0000255|PROSITE-ProRule:PRU10095}.; METAL 390 390 Zinc; catalytic. {ECO:0000250|UniProtKB:Q10740, ECO:0000255|PROSITE-ProRule:PRU10095}.; METAL 409 409 Zinc; catalytic. {ECO:0000250|UniProtKB:Q10740, ECO:0000255|PROSITE-ProRule:PRU10095}.	O57579;
P79171	3.4.11.2		Aminopeptidase N (AP-N) (fAPN) (EC 3.4.11.2) (Alanyl aminopeptidase) (Aminopeptidase M) (AP-M) (Microsomal aminopeptidase) (CD antigen CD13)	ANPEP APN	Felis catus (Cat) (Felis silvestris catus)	SUBCELLULAR LOCATION: Membrane; Single-pass type II membrane protein.	COFACTOR: Name=Zn(2+); Xref=ChEBI:CHEBI:29105; Evidence={ECO:0000250}; ; Note=Binds 1 zinc ion per subunit. {ECO:0000250};	METAL 387 387 Zinc; catalytic. {ECO:0000255|PROSITE-ProRule:PRU10095}.; METAL 391 391 Zinc; catalytic. {ECO:0000255|PROSITE-ProRule:PRU10095}.; METAL 410 410 Zinc; catalytic. {ECO:0000255|PROSITE-ProRule:PRU10095}.	P79171;
Q10737	3.4.11.2	BINDING 208 208 Substrate. {ECO:0000250}.	Aminopeptidase N (AP-N) (EC 3.4.11.2) (Membrane glycoprotein H11) (Microsomal aminopeptidase)		Haemonchus contortus (Barber pole worm)	SUBCELLULAR LOCATION: Membrane {ECO:0000250}; Single-pass type II membrane protein {ECO:0000250}.	COFACTOR: Name=Zn(2+); Xref=ChEBI:CHEBI:29105; Evidence={ECO:0000250}; ; Note=Binds 1 zinc ion per subunit. {ECO:0000250};	METAL 379 379 Zinc; catalytic. {ECO:0000255|PROSITE-ProRule:PRU10095}.; METAL 383 383 Zinc; catalytic. {ECO:0000255|PROSITE-ProRule:PRU10095}.; METAL 402 402 Zinc; catalytic. {ECO:0000255|PROSITE-ProRule:PRU10095}.
P15144	3.4.11.2		Aminopeptidase N (AP-N) (hAPN) (EC 3.4.11.2) (Alanyl aminopeptidase) (Aminopeptidase M) (AP-M) (Microsomal aminopeptidase) (Myeloid plasma membrane glycoprotein CD13) (gp150) (CD antigen CD13)	ANPEP APN CD13 PEPN	Homo sapiens (Human)	SUBCELLULAR LOCATION: Cell membrane; Single-pass type II membrane protein. Cytoplasm, cytosol {ECO:0000305}. Note=A soluble form has also been detected.	COFACTOR: Name=Zn(2+); Xref=ChEBI:CHEBI:29105; Evidence={ECO:0000269|PubMed:22932899}; ; Note=Binds 1 zinc ion per subunit. {ECO:0000269|PubMed:22932899};	METAL 388 388 Zinc; catalytic.; METAL 392 392 Zinc; catalytic.; METAL 411 411 Zinc; catalytic.	P15144;
P97449	3.4.11.2		Aminopeptidase N (AP-N) (mAPN) (EC 3.4.11.2) (Alanyl aminopeptidase) (Aminopeptidase M) (AP-M) (Membrane protein p161) (Microsomal aminopeptidase) (CD antigen CD13)	Anpep Lap-1 Lap1	Mus musculus (Mouse)	SUBCELLULAR LOCATION: Membrane; Single-pass type II membrane protein.	COFACTOR: Name=Zn(2+); Xref=ChEBI:CHEBI:29105; Evidence={ECO:0000250}; ; Note=Binds 1 zinc ion per subunit. {ECO:0000250};	METAL 387 387 Zinc; catalytic. {ECO:0000255|PROSITE-ProRule:PRU10095}.; METAL 391 391 Zinc; catalytic. {ECO:0000255|PROSITE-ProRule:PRU10095}.; METAL 410 410 Zinc; catalytic. {ECO:0000255|PROSITE-ProRule:PRU10095}.	P97449;
P15145	3.4.11.2		Aminopeptidase N (AP-N) (pAPN) (EC 3.4.11.2) (Alanyl aminopeptidase) (Aminopeptidase M) (AP-M) (Microsomal aminopeptidase) (gp130) (CD antigen CD13)	ANPEP	Sus scrofa (Pig)	SUBCELLULAR LOCATION: Membrane; Single-pass type II membrane protein.	COFACTOR: Name=Zn(2+); Xref=ChEBI:CHEBI:29105; Evidence={ECO:0000269|PubMed:22876187}; ; Note=Binds 1 zinc ion per subunit. {ECO:0000269|PubMed:22876187};	METAL 383 383 Zinc; catalytic.; METAL 387 387 Zinc; catalytic.; METAL 406 406 Zinc; catalytic.
P15541	3.4.11.2		Aminopeptidase N (AP-N) (rbAPN) (EC 3.4.11.2) (Alanyl aminopeptidase) (Aminopeptidase M) (AP-M) (Microsomal aminopeptidase) (CD antigen CD13)	ANPEP	Oryctolagus cuniculus (Rabbit)	SUBCELLULAR LOCATION: Membrane; Single-pass type II membrane protein.	COFACTOR: Name=Zn(2+); Xref=ChEBI:CHEBI:29105; Evidence={ECO:0000250}; ; Note=Binds 1 zinc ion per subunit. {ECO:0000250};	METAL 384 384 Zinc; catalytic. {ECO:0000255|PROSITE-ProRule:PRU10095}.; METAL 388 388 Zinc; catalytic. {ECO:0000255|PROSITE-ProRule:PRU10095}.; METAL 407 407 Zinc; catalytic. {ECO:0000255|PROSITE-ProRule:PRU10095}.	P15541;
P15684	3.4.11.2		Aminopeptidase N (AP-N) (rAPN) (EC 3.4.11.2) (Alanyl aminopeptidase) (Aminopeptidase M) (AP-M) (Kidney Zn peptidase) (KZP) (Microsomal aminopeptidase) (CD antigen CD13)	Anpep	Rattus norvegicus (Rat)	SUBCELLULAR LOCATION: Membrane; Single-pass type II membrane protein.	COFACTOR: Name=Zn(2+); Xref=ChEBI:CHEBI:29105; Evidence={ECO:0000250}; ; Note=Binds 1 zinc ion per subunit. {ECO:0000250};	METAL 387 387 Zinc; catalytic. {ECO:0000255|PROSITE-ProRule:PRU10095}.; METAL 391 391 Zinc; catalytic. {ECO:0000255|PROSITE-ProRule:PRU10095}.; METAL 410 410 Zinc; catalytic. {ECO:0000255|PROSITE-ProRule:PRU10095}.	P15684;
Q6Q4G3	3.4.11.-	BINDING 240 240 Substrate. {ECO:0000250}.	Aminopeptidase Q (AP-Q) (EC 3.4.11.-) (CHL2 antigen) (Laeverin)	AQPEP LVRN	Homo sapiens (Human)	SUBCELLULAR LOCATION: Membrane; Single-pass type II membrane protein.	COFACTOR: Name=Zn(2+); Xref=ChEBI:CHEBI:29105; Evidence={ECO:0000250}; ; Note=Binds 1 zinc ion per subunit. {ECO:0000250};	METAL 415 415 Zinc; catalytic. {ECO:0000255|PROSITE-ProRule:PRU10095}.; METAL 419 419 Zinc; catalytic. {ECO:0000255|PROSITE-ProRule:PRU10095}.; METAL 438 438 Zinc; catalytic. {ECO:0000255|PROSITE-ProRule:PRU10095}.	Q6Q4G3;
Q2KHK3	3.4.11.-	BINDING 237 237 Substrate. {ECO:0000250}.	Aminopeptidase Q (AP-Q) (EC 3.4.11.-) (Laeverin)	Aqpep Lvrn	Mus musculus (Mouse)	SUBCELLULAR LOCATION: Membrane {ECO:0000250}; Single-pass type II membrane protein {ECO:0000250}.	COFACTOR: Name=Zn(2+); Xref=ChEBI:CHEBI:29105; Evidence={ECO:0000250}; ; Note=Binds 1 zinc ion per subunit. {ECO:0000250};	METAL 412 412 Zinc; catalytic. {ECO:0000255|PROSITE-ProRule:PRU10095}.; METAL 416 416 Zinc; catalytic. {ECO:0000255|PROSITE-ProRule:PRU10095}.; METAL 435 435 Zinc; catalytic. {ECO:0000255|PROSITE-ProRule:PRU10095}.	Q2KHK3;
C0SJS3	1.14.13.115		Angelicin synthase (EC 1.14.13.115) (Cytochrome P450 CYP71AJ4) (Fragment)	CYP71AJ4	Pastinaca sativa (Parsnip) (Anethum pastinaca)	SUBCELLULAR LOCATION: Microsome membrane {ECO:0000250}; Single-pass membrane protein {ECO:0000250}.			C0SJS3;
P16066	4.6.1.2	BINDING 85 85 Chloride. {ECO:0000250}.; BINDING 117 117 Chloride; via amide nitrogen. {ECO:0000250}.; BINDING 118 118 Chloride; via amide nitrogen. {ECO:0000250}.	Atrial natriuretic peptide receptor 1 (EC 4.6.1.2) (Atrial natriuretic peptide receptor type A) (ANP-A) (ANPR-A) (NPR-A) (Guanylate cyclase A) (GC-A)	NPR1 ANPRA	Homo sapiens (Human)	SUBCELLULAR LOCATION: Membrane; Single-pass type I membrane protein.			P16066;
P18293	4.6.1.2	BINDING 81 81 Chloride. {ECO:0000250}.; BINDING 113 113 Chloride; via amide nitrogen. {ECO:0000250}.; BINDING 114 114 Chloride; via amide nitrogen. {ECO:0000250}.	Atrial natriuretic peptide receptor 1 (EC 4.6.1.2) (Atrial natriuretic peptide receptor type A) (ANP-A) (ANPR-A) (NPR-A) (Guanylate cyclase A) (GC-A)	Npr1 Npra	Mus musculus (Mouse)	SUBCELLULAR LOCATION: Membrane; Single-pass type I membrane protein.			P18293;
P18910	4.6.1.2	BINDING 81 81 Chloride. {ECO:0000269|PubMed:10894551, ECO:0000269|PubMed:15117952}.; BINDING 113 113 Chloride; via amide nitrogen. {ECO:0000269|PubMed:10894551, ECO:0000269|PubMed:15117952}.; BINDING 114 114 Chloride; via amide nitrogen. {ECO:0000269|PubMed:10894551, ECO:0000269|PubMed:15117952}.	Atrial natriuretic peptide receptor 1 (EC 4.6.1.2) (Atrial natriuretic peptide receptor type A) (ANP-A) (ANPR-A) (NPR-A) (Guanylate cyclase A) (GC-A)	Npr1	Rattus norvegicus (Rat)	SUBCELLULAR LOCATION: Membrane; Single-pass type I membrane protein.			P18910;
P55202	4.6.1.2		Atrial natriuretic peptide receptor 2 (EC 4.6.1.2) (Atrial natriuretic peptide receptor type B) (ANP-B) (ANPR-B) (NPR-B) (Guanylate cyclase B) (GC-B)	npr2	Anguilla japonica (Japanese eel)	SUBCELLULAR LOCATION: Membrane; Single-pass type I membrane protein.			P55202;
P46197	4.6.1.2		Atrial natriuretic peptide receptor 2 (EC 4.6.1.2) (Atrial natriuretic peptide receptor type B) (ANP-B) (ANPR-B) (NPR-B) (Guanylate cyclase B) (GC-B)	NPR2	Bos taurus (Bovine)	SUBCELLULAR LOCATION: Membrane; Single-pass type I membrane protein.			P46197;
P20594	4.6.1.2		Atrial natriuretic peptide receptor 2 (EC 4.6.1.2) (Atrial natriuretic peptide receptor type B) (ANP-B) (ANPR-B) (NPR-B) (Guanylate cyclase B) (GC-B)	NPR2 ANPRB	Homo sapiens (Human)	SUBCELLULAR LOCATION: Membrane; Single-pass type I membrane protein.			P20594;
Q6VVW5	4.6.1.2		Atrial natriuretic peptide receptor 2 (EC 4.6.1.2) (Atrial natriuretic peptide receptor type B) (ANP-B) (ANPR-B) (NPR-B) (Guanylate cyclase B) (GC-B)	Npr2	Mus musculus (Mouse)	SUBCELLULAR LOCATION: Membrane {ECO:0000250}; Single-pass type I membrane protein {ECO:0000250}.			Q6VVW5;
P16067	4.6.1.2		Atrial natriuretic peptide receptor 2 (EC 4.6.1.2) (Atrial natriuretic peptide receptor type B) (ANP-B) (ANPR-B) (NPR-B) (Guanylate cyclase B) (GC-B)	Npr2	Rattus norvegicus (Rat)	SUBCELLULAR LOCATION: Membrane; Single-pass type I membrane protein.			P16067;
Q9SR05	2.7.11.1	BINDING 545 545 ATP. {ECO:0000255|PROSITE-ProRule:PRU00159}.	Receptor-like protein kinase ANXUR1 (EC 2.7.11.1)	ANX1 At3g04690 F7O18.16	Arabidopsis thaliana (Mouse-ear cress)	SUBCELLULAR LOCATION: Cell membrane {ECO:0000250}; Single-pass type I membrane protein {ECO:0000250}.			Q9SR05;
Q3E8W4	2.7.11.1	BINDING 549 549 ATP. {ECO:0000255|PROSITE-ProRule:PRU00159}.	Receptor-like protein kinase ANXUR2 (EC 2.7.11.1)	ANX2 At5g28680 F4I4.60	Arabidopsis thaliana (Mouse-ear cress)	SUBCELLULAR LOCATION: Cell membrane {ECO:0000269|PubMed:19646876}; Single-pass type I membrane protein {ECO:0000269|PubMed:19646876}.			Q3E8W4;
Q9TTK6	1.4.3.21		Membrane primary amine oxidase (EC 1.4.3.21) (Copper amine oxidase) (Semicarbazide-sensitive amine oxidase) (SSAO) (Vascular adhesion protein 1) (VAP-1)	AOC3	Bos taurus (Bovine)	SUBCELLULAR LOCATION: Membrane {ECO:0000250}; Single-pass type II membrane protein {ECO:0000250}.	COFACTOR: Name=Cu cation; Xref=ChEBI:CHEBI:23378; Evidence={ECO:0000250}; ; Note=Binds 1 copper ion per subunit. {ECO:0000250};; COFACTOR: Name=Ca(2+); Xref=ChEBI:CHEBI:29108; Evidence={ECO:0000250}; ; Note=Binds 2 calcium ions per subunit. {ECO:0000250};; COFACTOR: Name=L-topaquinone; Xref=ChEBI:CHEBI:79027; Evidence={ECO:0000250}; ; Note=Contains 1 topaquinone per subunit. {ECO:0000250};	METAL 520 520 Copper. {ECO:0000250}.; METAL 522 522 Copper. {ECO:0000250}.; METAL 529 529 Calcium 1. {ECO:0000250}.; METAL 530 530 Calcium 1; via carbonyl oxygen. {ECO:0000250}.; METAL 531 531 Calcium 1. {ECO:0000250}.; METAL 572 572 Calcium 2. {ECO:0000250}.; METAL 638 638 Calcium 2. {ECO:0000250}.; METAL 663 663 Calcium 2; via carbonyl oxygen. {ECO:0000250}.; METAL 665 665 Calcium 2. {ECO:00002…	Q9TTK6;
Q16853	1.4.3.21		Membrane primary amine oxidase (EC 1.4.3.21) (Copper amine oxidase) (HPAO) (Semicarbazide-sensitive amine oxidase) (SSAO) (Vascular adhesion protein 1) (VAP-1)	AOC3 VAP1	Homo sapiens (Human)	SUBCELLULAR LOCATION: Cell membrane {ECO:0000269|PubMed:9653080}; Single-pass type II membrane protein {ECO:0000269|PubMed:9653080}.	COFACTOR: Name=Cu cation; Xref=ChEBI:CHEBI:23378; ; Note=Binds 1 copper ion per subunit.;; COFACTOR: Name=Ca(2+); Xref=ChEBI:CHEBI:29108; ; Note=Binds 2 calcium ions per subunit.;; COFACTOR: Name=L-topaquinone; Xref=ChEBI:CHEBI:79027; ; Note=Contains 1 topaquinone per subunit.;	METAL 520 520 Copper. {ECO:0000269|PubMed:16046623}.; METAL 522 522 Copper. {ECO:0000269|PubMed:16046623}.; METAL 529 529 Calcium 1.; METAL 530 530 Calcium 1; via carbonyl oxygen.; METAL 531 531 Calcium 1.; METAL 572 572 Calcium 2.; METAL 638 638 Calcium 2.; METAL 663 663 Calcium 2; via carbonyl oxygen.; METAL 665 665 Calcium 2.; METAL 667 667 Calcium 2.; METAL 673 673 Calcium 1.; METAL 674 674 C…	Q16853;
O70423	1.4.3.21		Membrane primary amine oxidase (EC 1.4.3.21) (Copper amine oxidase) (Semicarbazide-sensitive amine oxidase) (SSAO) (Vascular adhesion protein 1) (VAP-1)	Aoc3 Vap1	Mus musculus (Mouse)	SUBCELLULAR LOCATION: Membrane {ECO:0000250}; Single-pass type II membrane protein {ECO:0000250}.	COFACTOR: Name=Cu cation; Xref=ChEBI:CHEBI:23378; Evidence={ECO:0000250}; ; Note=Binds 1 copper ion per subunit. {ECO:0000250};; COFACTOR: Name=Ca(2+); Xref=ChEBI:CHEBI:29108; Evidence={ECO:0000250}; ; Note=Binds 2 calcium ions per subunit. {ECO:0000250};; COFACTOR: Name=L-topaquinone; Xref=ChEBI:CHEBI:79027; Evidence={ECO:0000250}; ; Note=Contains 1 topaquinone per subunit. {ECO:0000250};	METAL 520 520 Copper. {ECO:0000250}.; METAL 522 522 Copper. {ECO:0000250}.; METAL 529 529 Calcium 1. {ECO:0000250}.; METAL 530 530 Calcium 1; via carbonyl oxygen. {ECO:0000250}.; METAL 531 531 Calcium 1. {ECO:0000250}.; METAL 572 572 Calcium 2. {ECO:0000250}.; METAL 638 638 Calcium 2. {ECO:0000250}.; METAL 663 663 Calcium 2; via carbonyl oxygen. {ECO:0000250}.; METAL 665 665 Calcium 2. {ECO:00002…	O70423;
Q5R9I0	1.4.3.21		Membrane primary amine oxidase (EC 1.4.3.21) (Copper amine oxidase) (Semicarbazide-sensitive amine oxidase) (SSAO) (Vascular adhesion protein 1) (VAP-1)	AOC3	Pongo abelii (Sumatran orangutan) (Pongo pygmaeus abelii)	SUBCELLULAR LOCATION: Membrane {ECO:0000250}; Single-pass type II membrane protein {ECO:0000250}.	COFACTOR: Name=Cu cation; Xref=ChEBI:CHEBI:23378; Evidence={ECO:0000250}; ; Note=Binds 1 copper ion per subunit. {ECO:0000250};; COFACTOR: Name=Ca(2+); Xref=ChEBI:CHEBI:29108; Evidence={ECO:0000250}; ; Note=Binds 2 calcium ions per subunit. {ECO:0000250};; COFACTOR: Name=L-topaquinone; Xref=ChEBI:CHEBI:79027; Evidence={ECO:0000250}; ; Note=Contains 1 topaquinone per subunit. {ECO:0000250};	METAL 520 520 Copper. {ECO:0000250}.; METAL 522 522 Copper. {ECO:0000250}.; METAL 529 529 Calcium 1. {ECO:0000250}.; METAL 530 530 Calcium 1; via carbonyl oxygen. {ECO:0000250}.; METAL 531 531 Calcium 1. {ECO:0000250}.; METAL 572 572 Calcium 2. {ECO:0000250}.; METAL 638 638 Calcium 2. {ECO:0000250}.; METAL 663 663 Calcium 2; via carbonyl oxygen. {ECO:0000250}.; METAL 665 665 Calcium 2. {ECO:00002…	Q5R9I0;
O08590	1.4.3.21		Membrane primary amine oxidase (EC 1.4.3.21) (Copper amine oxidase) (Semicarbazide-sensitive amine oxidase) (SSAO) (VP97) (Vascular adhesion protein 1) (VAP-1)	Aoc3	Rattus norvegicus (Rat)	SUBCELLULAR LOCATION: Membrane {ECO:0000269|PubMed:8520629, ECO:0000269|PubMed:9083076}; Single-pass type II membrane protein {ECO:0000269|PubMed:8520629, ECO:0000269|PubMed:9083076}.	COFACTOR: Name=Cu cation; Xref=ChEBI:CHEBI:23378; Evidence={ECO:0000250}; ; Note=Binds 1 copper ion per subunit. {ECO:0000250};; COFACTOR: Name=Ca(2+); Xref=ChEBI:CHEBI:29108; Evidence={ECO:0000250}; ; Note=Binds 2 calcium ions per subunit. {ECO:0000250};; COFACTOR: Name=L-topaquinone; Xref=ChEBI:CHEBI:79027; Evidence={ECO:0000250}; ; Note=Contains 1 topaquinone per subunit. {ECO:0000250};	METAL 520 520 Copper. {ECO:0000250}.; METAL 522 522 Copper. {ECO:0000250}.; METAL 529 529 Calcium 1. {ECO:0000250}.; METAL 530 530 Calcium 1; via carbonyl oxygen. {ECO:0000250}.; METAL 531 531 Calcium 1. {ECO:0000250}.; METAL 572 572 Calcium 2. {ECO:0000250}.; METAL 638 638 Calcium 2. {ECO:0000250}.; METAL 663 663 Calcium 2; via carbonyl oxygen. {ECO:0000250}.; METAL 665 665 Calcium 2. {ECO:00002…
P21398	1.4.3.4		Amine oxidase [flavin-containing] A (EC 1.4.3.4) (Monoamine oxidase type A) (MAO-A)	MAOA	Bos taurus (Bovine)	SUBCELLULAR LOCATION: Mitochondrion outer membrane; Single-pass type IV membrane protein; Cytoplasmic side.	COFACTOR: Name=FAD; Xref=ChEBI:CHEBI:57692;		P21398;
P58027	1.4.3.4		Amine oxidase [flavin-containing] A (EC 1.4.3.4) (Monoamine oxidase type A) (MAO-A)	MAOA	Canis familiaris (Dog) (Canis lupus familiaris)	SUBCELLULAR LOCATION: Mitochondrion outer membrane {ECO:0000250}; Single-pass type IV membrane protein {ECO:0000250}; Cytoplasmic side {ECO:0000250}.	COFACTOR: Name=FAD; Xref=ChEBI:CHEBI:57692; Evidence={ECO:0000250};		P58027;
Q5NU32	1.4.3.4		Amine oxidase [flavin-containing] A (EC 1.4.3.4) (Monoamine oxidase type A) (MAO-A)	MAOA	Equus caballus (Horse)	SUBCELLULAR LOCATION: Mitochondrion outer membrane {ECO:0000250}; Single-pass type IV membrane protein {ECO:0000250}; Cytoplasmic side {ECO:0000250}.	COFACTOR: Name=FAD; Xref=ChEBI:CHEBI:57692; Evidence={ECO:0000250};		Q5NU32;
P21397	1.4.3.4		Amine oxidase [flavin-containing] A (EC 1.4.3.4) (Monoamine oxidase type A) (MAO-A)	MAOA	Homo sapiens (Human)	SUBCELLULAR LOCATION: Mitochondrion outer membrane; Single-pass type IV membrane protein; Cytoplasmic side.	COFACTOR: Name=FAD; Xref=ChEBI:CHEBI:57692; Evidence={ECO:0000269|PubMed:16129825, ECO:0000269|PubMed:18391214};		P21397;
Q64133	1.4.3.4		Amine oxidase [flavin-containing] A (EC 1.4.3.4) (Monoamine oxidase type A) (MAO-A)	Maoa	Mus musculus (Mouse)	SUBCELLULAR LOCATION: Mitochondrion outer membrane; Single-pass type IV membrane protein; Cytoplasmic side.	COFACTOR: Name=FAD; Xref=ChEBI:CHEBI:57692;		Q64133;
Q6Q2J0	1.4.3.4		Amine oxidase [flavin-containing] A (EC 1.4.3.4) (Monoamine oxidase type A) (MAO-A)	MAOA	Sus scrofa (Pig)	SUBCELLULAR LOCATION: Mitochondrion outer membrane {ECO:0000250}; Single-pass type IV membrane protein {ECO:0000250}; Cytoplasmic side {ECO:0000250}.	COFACTOR: Name=FAD; Xref=ChEBI:CHEBI:57692; Evidence={ECO:0000250};		Q6Q2J0;
Q5RE60	1.4.3.4		Amine oxidase [flavin-containing] A (EC 1.4.3.4) (Monoamine oxidase type A) (MAO-A)	MAOA	Pongo abelii (Sumatran orangutan) (Pongo pygmaeus abelii)	SUBCELLULAR LOCATION: Mitochondrion outer membrane {ECO:0000250}; Single-pass type IV membrane protein {ECO:0000250}; Cytoplasmic side {ECO:0000250}.	COFACTOR: Name=FAD; Xref=ChEBI:CHEBI:57692; Evidence={ECO:0000250};		Q5RE60;
P21396	1.4.3.4		Amine oxidase [flavin-containing] A (EC 1.4.3.4) (Monoamine oxidase type A) (MAO-A)	Maoa	Rattus norvegicus (Rat)	SUBCELLULAR LOCATION: Mitochondrion outer membrane {ECO:0000269|PubMed:15050826}; Single-pass type IV membrane protein {ECO:0000269|PubMed:15050826}; Cytoplasmic side {ECO:0000269|PubMed:15050826}.	COFACTOR: Name=FAD; Xref=ChEBI:CHEBI:57692; Evidence={ECO:0000269|PubMed:15050826};		P21396;
P56560	1.4.3.4		Amine oxidase [flavin-containing] B (EC 1.4.3.4) (Monoamine oxidase type B) (MAO-B)	MAOB	Bos taurus (Bovine)	SUBCELLULAR LOCATION: Mitochondrion outer membrane; Single-pass type IV membrane protein; Cytoplasmic side.	COFACTOR: Name=FAD; Xref=ChEBI:CHEBI:57692;		P56560;
Q7YRB7	1.4.3.4		Amine oxidase [flavin-containing] B (EC 1.4.3.4) (Monoamine oxidase type B) (MAO-B)	MAOB	Canis familiaris (Dog) (Canis lupus familiaris)	SUBCELLULAR LOCATION: Mitochondrion outer membrane {ECO:0000250}; Single-pass type IV membrane protein {ECO:0000250}; Cytoplasmic side {ECO:0000250}.	COFACTOR: Name=FAD; Xref=ChEBI:CHEBI:57692; Evidence={ECO:0000250};		Q7YRB7;
P58028	1.4.3.4		Amine oxidase [flavin-containing] B (EC 1.4.3.4) (Monoamine oxidase type B) (MAO-B)	MAOB	Cavia porcellus (Guinea pig)	SUBCELLULAR LOCATION: Mitochondrion outer membrane; Single-pass type IV membrane protein; Cytoplasmic side.	COFACTOR: Name=FAD; Xref=ChEBI:CHEBI:57692;		P58028;
P27338	1.4.3.4		Amine oxidase [flavin-containing] B (EC 1.4.3.4) (Monoamine oxidase type B) (MAO-B)	MAOB	Homo sapiens (Human)	SUBCELLULAR LOCATION: Mitochondrion outer membrane; Single-pass type IV membrane protein; Cytoplasmic side.	COFACTOR: Name=FAD; Xref=ChEBI:CHEBI:57692;		P27338;
Q8BW75	1.4.3.4		Amine oxidase [flavin-containing] B (EC 1.4.3.4) (Monoamine oxidase type B) (MAO-B)	Maob	Mus musculus (Mouse)	SUBCELLULAR LOCATION: Mitochondrion outer membrane {ECO:0000250}; Single-pass type IV membrane protein {ECO:0000250}; Cytoplasmic side {ECO:0000250}.	COFACTOR: Name=FAD; Xref=ChEBI:CHEBI:57692; Evidence={ECO:0000250};		Q8BW75;
Q6PLK3	1.4.3.4		Amine oxidase [flavin-containing] B (EC 1.4.3.4) (Monoamine oxidase type B) (MAO-B)	MAOB	Sus scrofa (Pig)	SUBCELLULAR LOCATION: Mitochondrion outer membrane {ECO:0000250}; Single-pass type IV membrane protein {ECO:0000250}; Cytoplasmic side {ECO:0000250}.	COFACTOR: Name=FAD; Xref=ChEBI:CHEBI:57692; Evidence={ECO:0000250};		Q6PLK3;
Q5RE98	1.4.3.4		Amine oxidase [flavin-containing] B (EC 1.4.3.4) (Monoamine oxidase type B) (MAO-B)	MAOB	Pongo abelii (Sumatran orangutan) (Pongo pygmaeus abelii)	SUBCELLULAR LOCATION: Mitochondrion outer membrane {ECO:0000250}; Single-pass type IV membrane protein {ECO:0000250}; Cytoplasmic side {ECO:0000250}.	COFACTOR: Name=FAD; Xref=ChEBI:CHEBI:57692; Evidence={ECO:0000250};		Q5RE98;
P19643	1.4.3.4		Amine oxidase [flavin-containing] B (EC 1.4.3.4) (Monoamine oxidase type B) (MAO-B)	Maob	Rattus norvegicus (Rat)	SUBCELLULAR LOCATION: Mitochondrion outer membrane; Single-pass type IV membrane protein; Cytoplasmic side.	COFACTOR: Name=FAD; Xref=ChEBI:CHEBI:57692;		P19643;
Q6NSN2	1.4.3.4		Amine oxidase [flavin-containing] (EC 1.4.3.4) (Monoamine oxidase) (MAO) (Z-MAO)	mao zgc:85761	Danio rerio (Zebrafish) (Brachydanio rerio)	SUBCELLULAR LOCATION: Mitochondrion outer membrane; Single-pass type IV membrane protein; Cytoplasmic side.	COFACTOR: Name=FAD; Xref=ChEBI:CHEBI:57692; Evidence={ECO:0000305};		Q6NSN2;
P49253	1.4.3.4		Amine oxidase [flavin-containing] (EC 1.4.3.4) (Monoamine oxidase) (MAO)	mao	Oncorhynchus mykiss (Rainbow trout) (Salmo gairdneri)	SUBCELLULAR LOCATION: Mitochondrion outer membrane; Single-pass type IV membrane protein; Cytoplasmic side.	COFACTOR: Name=FAD; Xref=ChEBI:CHEBI:57692;		P49253;
O93853	1.-.-.-		Alternative oxidase 1, mitochondrial (EC 1.-.-.-)	AOX1 AOX1A	Candida albicans (Yeast)	SUBCELLULAR LOCATION: Mitochondrion inner membrane {ECO:0000250}; Single-pass membrane protein {ECO:0000250}; Matrix side {ECO:0000250}. Note=Possibly in the inner surface of the inner mitochondrial membrane. {ECO:0000250}.	COFACTOR: Name=Fe cation; Xref=ChEBI:CHEBI:24875; Evidence={ECO:0000250}; ; Note=Binds 2 iron ions per subunit. {ECO:0000250};	METAL 180 180 Iron. {ECO:0000255}.; METAL 219 219 Iron. {ECO:0000255}.; METAL 222 222 Iron. {ECO:0000255}.; METAL 271 271 Iron. {ECO:0000255}.; METAL 326 326 Iron. {ECO:0000255}.; METAL 329 329 Iron. {ECO:0000255}.
Q9UV71	1.-.-.-		Alternative oxidase 2, mitochondrial (EC 1.-.-.-)	AOX2 AOX1B	Candida albicans (Yeast)	SUBCELLULAR LOCATION: Mitochondrion inner membrane {ECO:0000250}; Single-pass membrane protein {ECO:0000250}; Matrix side {ECO:0000250}. Note=Possibly in the inner surface of the inner mitochondrial membrane. {ECO:0000250}.	COFACTOR: Name=Fe cation; Xref=ChEBI:CHEBI:24875; Evidence={ECO:0000250}; ; Note=Binds 2 iron ions per subunit. {ECO:0000250};	METAL 166 166 Iron. {ECO:0000255}.; METAL 205 205 Iron. {ECO:0000255}.; METAL 208 208 Iron. {ECO:0000255}.; METAL 257 257 Iron. {ECO:0000255}.; METAL 312 312 Iron. {ECO:0000255}.; METAL 315 315 Iron. {ECO:0000255}.
Q53RT3	3.4.23.-		Retroviral-like aspartic protease 1 (EC 3.4.23.-) (Skin-specific retroviral-like aspartic protease) (SASPase) (Skin aspartic protease) (TPA-inducible aspartic proteinase-like protein) (TAPS)	ASPRV1 SASP	Homo sapiens (Human)	SUBCELLULAR LOCATION: Membrane {ECO:0000255}; Single-pass membrane protein {ECO:0000255}.			Q53RT3;
Q09PK2	3.4.23.-		Retroviral-like aspartic protease 1 (EC 3.4.23.-) (Skin-specific retroviral-like aspartic protease) (SASPase) (Skin aspartic protease) (TPA-inducible aspartic proteinase-like protein)	Asprv1 Sasp Taps	Mus musculus (Mouse)	SUBCELLULAR LOCATION: Membrane {ECO:0000255}; Single-pass membrane protein {ECO:0000255}.			Q09PK2;
Q42564	1.11.1.11		L-ascorbate peroxidase 3, peroxisomal (AtAPx03) (EC 1.11.1.11)	APX3 APX APXIII At4g35000 M4E13.60	Arabidopsis thaliana (Mouse-ear cress)	SUBCELLULAR LOCATION: Peroxisome membrane {ECO:0000269|PubMed:16873450}; Single-pass membrane protein {ECO:0000269|PubMed:16873450}. Glyoxysome membrane {ECO:0000269|PubMed:16873450}; Single-pass membrane protein {ECO:0000269|PubMed:16873450}.	COFACTOR: Name=heme b; Xref=ChEBI:CHEBI:60344; ; Note=Binds 1 heme b (iron(II)-protoporphyrin IX) group per subunit.;	METAL 160 160 Iron (heme axial ligand). {ECO:0000255|PROSITE-ProRule:PRU00297}.; METAL 161 161 Potassium or calcium. {ECO:0000250}.; METAL 177 177 Potassium or calcium. {ECO:0000250}.; METAL 184 184 Potassium or calcium. {ECO:0000250}.	Q42564;
Q01MI9	1.11.1.11		Probable L-ascorbate peroxidase 3 (EC 1.11.1.11) (OsAPx03)	APX3 H0515C11.2 OsI_014375	Oryza sativa subsp. indica (Rice)	SUBCELLULAR LOCATION: Membrane {ECO:0000305}; Single-pass membrane protein {ECO:0000305}.	COFACTOR: Name=heme b; Xref=ChEBI:CHEBI:60344; Evidence={ECO:0000250}; ; Note=Binds 1 heme b (iron(II)-protoporphyrin IX) group. {ECO:0000250};	METAL 161 161 Iron (heme axial ligand). {ECO:0000255|PROSITE-ProRule:PRU00297}.; METAL 162 162 Potassium or calcium. {ECO:0000250}.; METAL 178 178 Potassium or calcium. {ECO:0000250}.; METAL 185 185 Potassium or calcium. {ECO:0000250}.	Q01MI9;
Q0JEQ2	1.11.1.11		Probable L-ascorbate peroxidase 3 (EC 1.11.1.11) (OsAPx03)	APX3 Os04g0223300 LOC_Os04g14680 OsJ_013310 OSJNBb0072N21.2	Oryza sativa subsp. japonica (Rice)	SUBCELLULAR LOCATION: Membrane {ECO:0000305}; Single-pass membrane protein {ECO:0000305}.	COFACTOR: Name=heme b; Xref=ChEBI:CHEBI:60344; Evidence={ECO:0000250}; ; Note=Binds 1 heme b (iron(II)-protoporphyrin IX) group. {ECO:0000250};	METAL 161 161 Iron (heme axial ligand). {ECO:0000255|PROSITE-ProRule:PRU00297}.; METAL 162 162 Potassium or calcium. {ECO:0000250}.; METAL 178 178 Potassium or calcium. {ECO:0000250}.; METAL 185 185 Potassium or calcium. {ECO:0000250}.	Q0JEQ2;
Q6ZJJ1	1.11.1.11		Probable L-ascorbate peroxidase 4 (EC 1.11.1.11) (OsAPx04)	APX4 Os08g0549100 LOC_Os08g43560 OJ1479_B11.9	Oryza sativa subsp. japonica (Rice)	SUBCELLULAR LOCATION: Membrane {ECO:0000305}; Single-pass membrane protein {ECO:0000305}.	COFACTOR: Name=heme b; Xref=ChEBI:CHEBI:60344; Evidence={ECO:0000250}; ; Note=Binds 1 heme b (iron(II)-protoporphyrin IX) group. {ECO:0000250};	METAL 160 160 Iron (heme axial ligand). {ECO:0000255|PROSITE-ProRule:PRU00297}.; METAL 161 161 Potassium or calcium. {ECO:0000250}.; METAL 177 177 Potassium or calcium. {ECO:0000250}.; METAL 184 184 Potassium or calcium. {ECO:0000250}.	Q6ZJJ1;
Q7XZP5	1.11.1.11		L-ascorbate peroxidase 5, peroxisomal (AtAPx04) (EC 1.11.1.11)	APX5 At4g35970 F4B14_240 T19K4.100	Arabidopsis thaliana (Mouse-ear cress)	SUBCELLULAR LOCATION: Peroxisome membrane {ECO:0000305}; Single-pass membrane protein {ECO:0000305}.	COFACTOR: Name=heme b; Xref=ChEBI:CHEBI:60344; ; Note=Binds 1 heme b (iron(II)-protoporphyrin IX) group per subunit.;	METAL 158 158 Iron (heme axial ligand). {ECO:0000255|PROSITE-ProRule:PRU00297}.; METAL 159 159 Potassium or calcium. {ECO:0000250}.; METAL 175 175 Potassium or calcium. {ECO:0000250}.; METAL 182 182 Potassium or calcium. {ECO:0000250}.	Q7XZP5;
Q69SV0	1.11.1.11		Probable L-ascorbate peroxidase 8, chloroplastic (EC 1.11.1.11) (OsAPx08)	APX8 Os02g0553200 LOC_Os02g34810 P0470G10.5	Oryza sativa subsp. japonica (Rice)	SUBCELLULAR LOCATION: Plastid, chloroplast membrane {ECO:0000305}; Single-pass membrane protein {ECO:0000305}.	COFACTOR: Name=heme b; Xref=ChEBI:CHEBI:60344; Evidence={ECO:0000250}; ; Note=Binds 1 heme b (iron(II)-protoporphyrin IX) group. {ECO:0000250};	METAL 246 246 Iron (heme axial ligand). {ECO:0000255|PROSITE-ProRule:PRU00297}.; METAL 247 247 Potassium or calcium. {ECO:0000250}.; METAL 279 279 Potassium or calcium. {ECO:0000250}.; METAL 286 286 Potassium or calcium. {ECO:0000250}.	Q69SV0;
Q42593	1.11.1.11		L-ascorbate peroxidase T, chloroplastic (EC 1.11.1.11) (Thylakoid-bound ascorbate peroxidase) (AtAPx06) (tAPX)	APXT At1g77490 T5M16.8	Arabidopsis thaliana (Mouse-ear cress)	SUBCELLULAR LOCATION: Plastid, chloroplast thylakoid membrane {ECO:0000305}; Single-pass membrane protein {ECO:0000305}.	COFACTOR: Name=heme b; Xref=ChEBI:CHEBI:60344; ; Note=Binds 1 heme b (iron(II)-protoporphyrin IX) group per subunit.;	METAL 241 241 Iron (heme axial ligand). {ECO:0000255|PROSITE-ProRule:PRU00297}.; METAL 242 242 Potassium or calcium. {ECO:0000250}.; METAL 274 274 Potassium or calcium. {ECO:0000250}.; METAL 281 281 Potassium or calcium. {ECO:0000250}.	Q42593;
Q9SQG2	3.6.1.5		Apyrase 1 (AtAPY1) (EC 3.6.1.5) (ATP-diphosphatase) (ATP-diphosphohydrolase) (Adenosine diphosphatase) (ADPase) (NTPDase) (Nucleoside triphosphate diphosphohydrolase 1)	APY1 At3g04080 T6K12.30	Arabidopsis thaliana (Mouse-ear cress)	SUBCELLULAR LOCATION: Golgi apparatus membrane {ECO:0000269|PubMed:22430844}; Single-pass type II membrane protein {ECO:0000269|PubMed:22430844}. Membrane {ECO:0000305|PubMed:22430844}; Single-pass type II membrane protein {ECO:0000305|PubMed:22430844}. Note=As cell membrane protein, the functional domain could be at the extracellular side.	COFACTOR: Name=Ca(2+); Xref=ChEBI:CHEBI:29108; Evidence={ECO:0000269|Ref.1};		Q9SQG2;
Q8H7L6	3.6.1.5		Probable apyrase 1 (OsAPY1) (EC 3.6.1.5) (ATP-diphosphatase) (ATP-diphosphohydrolase) (Adenosine diphosphatase) (ADPase)	APY1 Os03g0328400 LOC_Os03g21120 OSJNBb0014I10.10	Oryza sativa subsp. japonica (Rice)	SUBCELLULAR LOCATION: Membrane {ECO:0000250}; Single-pass type II membrane protein {ECO:0000250}.	COFACTOR: Name=Ca(2+); Xref=ChEBI:CHEBI:29108; Evidence={ECO:0000250};
Q9SPM5	3.6.1.5		Apyrase 2 (AtAPY2) (EC 3.6.1.5) (ATP-diphosphatase) (ATP-diphosphohydrolase) (Adenosine diphosphatase) (ADPase) (NTPDase) (Nucleoside triphosphate diphosphohydrolase 2)	APY2 At5g18280 MRG7.24	Arabidopsis thaliana (Mouse-ear cress)	SUBCELLULAR LOCATION: Golgi apparatus membrane {ECO:0000269|PubMed:22430844}; Single-pass type II membrane protein {ECO:0000269|PubMed:22430844}. Membrane {ECO:0000305|PubMed:22430844}; Single-pass type II membrane protein {ECO:0000305|PubMed:22430844}. Note=As cell membrane protein, the functional domain could be at the extracellular side.	COFACTOR: Name=Ca(2+); Xref=ChEBI:CHEBI:29108; Evidence={ECO:0000250};		Q9SPM5;
Q6Z4P2	3.6.1.5		Probable apyrase 2 (OsAPY2) (EC 3.6.1.5) (ATP-diphosphatase) (ATP-diphosphohydrolase) (Adenosine diphosphatase) (ADPase)	APY2 Os07g0682800 LOC_Os07g48430 OsJ_25612 OSJNBa0060O17.4	Oryza sativa subsp. japonica (Rice)	SUBCELLULAR LOCATION: Membrane {ECO:0000250}; Single-pass type II membrane protein {ECO:0000250}.	COFACTOR: Name=Ca(2+); Xref=ChEBI:CHEBI:29108; Evidence={ECO:0000250};
Q9XI62	3.6.1.5		Probable apyrase 3 (AtAPY3) (EC 3.6.1.5) (ATP-diphosphatase) (ATP-diphosphohydrolase) (Adenosine diphosphatase) (ADPase) (NTPDase) (Nucleoside triphosphate diphosphohydrolase 3)	APY3 At1g14240 F7A19.34	Arabidopsis thaliana (Mouse-ear cress)	SUBCELLULAR LOCATION: Membrane {ECO:0000250}; Single-pass type II membrane protein {ECO:0000250}.	COFACTOR: Name=Ca(2+); Xref=ChEBI:CHEBI:29108; Evidence={ECO:0000250};		Q9XI62;
Q8H1D8	3.6.1.5		Probable apyrase 4 (AtAPY4) (EC 3.6.1.5) (ATP-diphosphatase) (ATP-diphosphohydrolase) (Adenosine diphosphatase) (ADPase) (NTPDase) (Nucleoside triphosphate diphosphohydrolase 4)	APY4 At1g14230 F7A19.33	Arabidopsis thaliana (Mouse-ear cress)	SUBCELLULAR LOCATION: Membrane {ECO:0000250}; Single-pass type II membrane protein {ECO:0000250}.	COFACTOR: Name=Ca(2+); Xref=ChEBI:CHEBI:29108; Evidence={ECO:0000250};		Q8H1D8;
Q6NQA8	3.6.1.5		Probable apyrase 5 (AtAPY5) (EC 3.6.1.5) (ATP-diphosphatase) (ATP-diphosphohydrolase) (Adenosine diphosphatase) (ADPase) (NTPDase) (Nucleoside triphosphate diphosphohydrolase 5)	APY5 At1g14250 F14L17.1 F7A19	Arabidopsis thaliana (Mouse-ear cress)	SUBCELLULAR LOCATION: Membrane {ECO:0000250}; Single-pass type II membrane protein {ECO:0000250}.	COFACTOR: Name=Ca(2+); Xref=ChEBI:CHEBI:29108; Evidence={ECO:0000250};		Q6NQA8;
P80595	3.6.1.5		Apyrase (EC 3.6.1.5) (ATP-diphosphatase) (ATP-diphosphohydrolase) (Adenosine diphosphatase) (ADPase)	RROP1	Solanum tuberosum (Potato)	SUBCELLULAR LOCATION: Membrane {ECO:0000305}; Single-pass type II membrane protein {ECO:0000305}.	COFACTOR: Name=Ca(2+); Xref=ChEBI:CHEBI:29108;		P80595;
Q6DBG8	2.4.2.-		Probable arabinosyltransferase ARAD1 (EC 2.4.2.-) (Arabinan alpha-1,5-arabinosyltransferase) (L-Arabinosyltransferase) (Protein ARABINAN DEFICIENT 1)	ARAD1 At2g35100 T4C15	Arabidopsis thaliana (Mouse-ear cress)	SUBCELLULAR LOCATION: Golgi apparatus membrane {ECO:0000305|PubMed:22270560}; Single-pass type II membrane protein {ECO:0000305}.
Q9FLA5	2.4.2.-		Probable arabinosyltransferase ARAD2 (EC 2.4.2.-) (Arabinan alpha-1,5-arabinosyltransferase) (L-Arabinosyltransferase) (Protein ARABINAN DEFICIENT 2)	ARAD2 At5g44930 K21C13.11	Arabidopsis thaliana (Mouse-ear cress)	SUBCELLULAR LOCATION: Golgi apparatus membrane {ECO:0000305|PubMed:22270560}; Single-pass type II membrane protein {ECO:0000305}.
Q9SA77	5.1.3.5		UDP-arabinose 4-epimerase 1 (EC 5.1.3.5) (UDP-D-xylose 4-epimerase 1)	MUR4 At1g30620 T5I8.7	Arabidopsis thaliana (Mouse-ear cress)	SUBCELLULAR LOCATION: Golgi apparatus, Golgi stack membrane {ECO:0000269|PubMed:12566589}; Single-pass type II membrane protein {ECO:0000269|PubMed:12566589}.	COFACTOR: Name=NAD(+); Xref=ChEBI:CHEBI:57540; Evidence={ECO:0000250};		Q9SA77;
Q8H930	5.1.3.5		Probable UDP-arabinose 4-epimerase 1 (EC 5.1.3.5) (OsUEL-1) (UDP-D-xylose 4-epimerase 1) (UDP-galactose 4-epimerase-like protein 1)	UEL-1 Os07g0139400 LOC_Os07g04690 OJ1417_E01.121 P0495H05.61	Oryza sativa subsp. japonica (Rice)	SUBCELLULAR LOCATION: Golgi apparatus, Golgi stack membrane {ECO:0000305}; Single-pass type II membrane protein {ECO:0000305}.	COFACTOR: Name=NAD(+); Xref=ChEBI:CHEBI:57540; Evidence={ECO:0000250};		Q8H930;
O64749	5.1.3.5		Putative UDP-arabinose 4-epimerase 2 (EC 5.1.3.5) (UDP-D-xylose 4-epimerase 2)	At2g34850 F19I3.8	Arabidopsis thaliana (Mouse-ear cress)	SUBCELLULAR LOCATION: Golgi apparatus, Golgi stack membrane {ECO:0000305}; Single-pass type II membrane protein {ECO:0000305}.	COFACTOR: Name=NAD(+); Xref=ChEBI:CHEBI:57540; Evidence={ECO:0000250};		O64749;
Q8H0B6	5.1.3.5		Probable UDP-arabinose 4-epimerase 2 (EC 5.1.3.5) (OsUEL-2) (UDP-D-xylose 4-epimerase 2) (UDP-galactose 4-epimerase-like protein 2)	UEL-2 Os04g0618200 LOC_Os04g52730 OSJNBa0058K23.4 OSJNBa0093O08.14	Oryza sativa subsp. japonica (Rice)	SUBCELLULAR LOCATION: Golgi apparatus, Golgi stack membrane {ECO:0000305}; Single-pass type II membrane protein {ECO:0000305}.	COFACTOR: Name=NAD(+); Xref=ChEBI:CHEBI:57540; Evidence={ECO:0000250};		Q8H0B6;
Q9SUN3	5.1.3.5		Probable UDP-arabinose 4-epimerase 3 (EC 5.1.3.5) (UDP-D-xylose 4-epimerase 3)	At4g20460 F9F13.110	Arabidopsis thaliana (Mouse-ear cress)	SUBCELLULAR LOCATION: Golgi apparatus, Golgi stack membrane {ECO:0000305}; Single-pass type II membrane protein {ECO:0000305}.	COFACTOR: Name=NAD(+); Xref=ChEBI:CHEBI:57540; Evidence={ECO:0000250};		Q9SUN3;
Q8H0B2	5.1.3.5		Probable UDP-arabinose 4-epimerase 3 (EC 5.1.3.5) (OsUEL-3) (UDP-D-xylose 4-epimerase 3) (UDP-galactose 4-epimerase-like protein 3)	UEL-3 Os08g0129700 LOC_Os08g03570 P0582D05.120	Oryza sativa subsp. japonica (Rice)	SUBCELLULAR LOCATION: Golgi apparatus, Golgi stack membrane {ECO:0000305}; Single-pass type II membrane protein {ECO:0000305}.	COFACTOR: Name=NAD(+); Xref=ChEBI:CHEBI:57540; Evidence={ECO:0000250};		Q8H0B2;
Q9FI17	5.1.3.5		Putative UDP-arabinose 4-epimerase 4 (EC 5.1.3.5) (UDP-D-xylose 4-epimerase 4)	At5g44480 MFC16.15	Arabidopsis thaliana (Mouse-ear cress)	SUBCELLULAR LOCATION: Golgi apparatus, Golgi stack membrane {ECO:0000305}; Single-pass type II membrane protein {ECO:0000305}.	COFACTOR: Name=NAD(+); Xref=ChEBI:CHEBI:57540; Evidence={ECO:0000250};		Q9FI17;
O23461	2.7.1.46		L-arabinokinase (AtISA1) (EC 2.7.1.46)	ARA1 ISA1 At4g16130 dl4105w FCAALL.288	Arabidopsis thaliana (Mouse-ear cress)	SUBCELLULAR LOCATION: Membrane {ECO:0000305}; Single-pass membrane protein {ECO:0000305}.			O23461;
Q6WZB0	1.14.11.41	BINDING 194 194 Alpha-ketoglutarate.; BINDING 330 330 Alpha-ketoglutarate.; BINDING 334 334 Alpha-ketoglutarate.; BINDING 334 334 Arginine.	Alpha-ketoglutarate-dependent L-arginine hydroxylase (EC 1.14.11.41) (Viomycin biosynthesis protein C)	vioC	Streptomyces vinaceus	SUBCELLULAR LOCATION: Membrane {ECO:0000305}; Single-pass membrane protein {ECO:0000305}.	COFACTOR: Name=Fe cation; Xref=ChEBI:CHEBI:24875; Evidence={ECO:0000269|PubMed:19490124};	METAL 168 168 Iron.; METAL 170 170 Iron.; METAL 316 316 Iron.	Q6WZB0;
Q5W7F1	3.5.1.23		Neutral ceramidase (N-CDase) (NCDase) (EC 3.5.1.23) (Acylsphingosine deacylase 2) (N-acylsphingosine amidohydrolase 2) (znCD)	asah2	Danio rerio (Zebrafish) (Brachydanio rerio)	SUBCELLULAR LOCATION: Cell membrane {ECO:0000269|PubMed:15271994}; Single-pass type II membrane protein {ECO:0000269|PubMed:15271994}.
Q9NR71	3.5.1.23		Neutral ceramidase (N-CDase) (NCDase) (EC 3.5.1.23) (Acylsphingosine deacylase 2) (BCDase) (LCDase) (hCD) (N-acylsphingosine amidohydrolase 2) (Non-lysosomal ceramidase) [Cleaved into: Neutral ceramidase soluble form]	ASAH2 HNAC1	Homo sapiens (Human)	SUBCELLULAR LOCATION: Cell membrane {ECO:0000269|PubMed:15845354}; Single-pass type II membrane protein {ECO:0000269|PubMed:15845354}. Note=The neutral ceramidase soluble form is a secreted protein. According to PubMed:10781606, it is mitochondrial. However, they used a shorter form in its N-terminus, which may explain this localization which probably does not exist in vivo.			Q9NR71;
Q9JHE3	3.5.1.23		Neutral ceramidase (N-CDase) (NCDase) (EC 3.5.1.23) (Acylsphingosine deacylase 2) (N-acylsphingosine amidohydrolase 2) [Cleaved into: Neutral ceramidase soluble form]	Asah2	Mus musculus (Mouse)	SUBCELLULAR LOCATION: Cell membrane {ECO:0000269|PubMed:11591392, ECO:0000269|PubMed:12921776}; Single-pass type II membrane protein {ECO:0000269|PubMed:11591392, ECO:0000269|PubMed:12921776}. Note=The neutral ceramidase soluble form is a secreted protein.			Q9JHE3;
Q91XT9	3.5.1.23		Neutral ceramidase (N-CDase) (NCDase) (EC 3.5.1.23) (Acylsphingosine deacylase 2) (N-acylsphingosine amidohydrolase 2) [Cleaved into: Neutral ceramidase soluble form]	Asah2	Rattus norvegicus (Rat)	SUBCELLULAR LOCATION: Cell membrane {ECO:0000269|PubMed:11328816, ECO:0000269|PubMed:12499379}; Single-pass type II membrane protein {ECO:0000269|PubMed:11328816, ECO:0000269|PubMed:12499379}. Note=The neutral ceramidase soluble form is a secreted protein.
A1L515	1.14.11.-		Aspartate beta-hydroxylase domain-containing protein 1 (EC 1.14.11.-)	ASPHD1	Bos taurus (Bovine)	SUBCELLULAR LOCATION: Membrane {ECO:0000305}; Single-pass type II membrane protein {ECO:0000305}.			A1L515;
Q5U4P2	1.14.11.-		Aspartate beta-hydroxylase domain-containing protein 1 (EC 1.14.11.-)	ASPHD1	Homo sapiens (Human)	SUBCELLULAR LOCATION: Membrane {ECO:0000305}; Single-pass type II membrane protein {ECO:0000305}.			Q5U4P2;
Q2TA57	1.14.11.-		Aspartate beta-hydroxylase domain-containing protein 1 (EC 1.14.11.-)	Asphd1	Mus musculus (Mouse)	SUBCELLULAR LOCATION: Membrane {ECO:0000305}; Single-pass type II membrane protein {ECO:0000305}.			Q2TA57;
A0JMH0	1.14.11.-		Aspartate beta-hydroxylase domain-containing protein 2 (EC 1.14.11.-)	asphd2 si:ch211-286e11.9 zgc:153516	Danio rerio (Zebrafish) (Brachydanio rerio)	SUBCELLULAR LOCATION: Membrane {ECO:0000305}; Single-pass type II membrane protein {ECO:0000305}.			A0JMH0;
Q6ICH7	1.14.11.-	BINDING 228 228 2-oxoglutarate. {ECO:0000250}.; BINDING 272 272 2-oxoglutarate. {ECO:0000250}.; BINDING 341 341 2-oxoglutarate. {ECO:0000250}.	Aspartate beta-hydroxylase domain-containing protein 2 (EC 1.14.11.-)	ASPHD2	Homo sapiens (Human)	SUBCELLULAR LOCATION: Membrane {ECO:0000305}; Single-pass type II membrane protein {ECO:0000305}.	COFACTOR: Name=Fe cation; Xref=ChEBI:CHEBI:24875; Evidence={ECO:0000250};	METAL 283 283 Iron. {ECO:0000250}.; METAL 328 328 Iron. {ECO:0000250}.	Q6ICH7;
Q80VP9	1.14.11.-	BINDING 202 202 2-oxoglutarate. {ECO:0000250}.; BINDING 246 246 2-oxoglutarate. {ECO:0000250}.; BINDING 315 315 2-oxoglutarate. {ECO:0000250}.	Aspartate beta-hydroxylase domain-containing protein 2 (EC 1.14.11.-)	Asphd2	Mus musculus (Mouse)	SUBCELLULAR LOCATION: Membrane {ECO:0000305}; Single-pass type II membrane protein {ECO:0000305}.	COFACTOR: Name=Fe cation; Xref=ChEBI:CHEBI:24875; Evidence={ECO:0000250};	METAL 257 257 Iron. {ECO:0000250}.; METAL 302 302 Iron. {ECO:0000250}.	Q80VP9;
Q5HZW3	1.14.11.-	BINDING 202 202 2-oxoglutarate. {ECO:0000250}.; BINDING 246 246 2-oxoglutarate. {ECO:0000250}.; BINDING 315 315 2-oxoglutarate. {ECO:0000250}.	Aspartate beta-hydroxylase domain-containing protein 2 (EC 1.14.11.-)	Asphd2	Rattus norvegicus (Rat)	SUBCELLULAR LOCATION: Membrane {ECO:0000305}; Single-pass type II membrane protein {ECO:0000305}.	COFACTOR: Name=Fe cation; Xref=ChEBI:CHEBI:24875; Evidence={ECO:0000250};	METAL 257 257 Iron. {ECO:0000250}.; METAL 302 302 Iron. {ECO:0000250}.	Q5HZW3;
B5DE73	1.14.11.-	BINDING 229 229 2-oxoglutarate. {ECO:0000250}.; BINDING 273 273 2-oxoglutarate. {ECO:0000250}.; BINDING 342 342 2-oxoglutarate. {ECO:0000250}.	Aspartate beta-hydroxylase domain-containing protein 2 (EC 1.14.11.-)	asphd2	Xenopus tropicalis (Western clawed frog) (Silurana tropicalis)	SUBCELLULAR LOCATION: Membrane {ECO:0000305}; Single-pass type II membrane protein {ECO:0000305}.	COFACTOR: Name=Fe cation; Xref=ChEBI:CHEBI:24875; Evidence={ECO:0000250};	METAL 284 284 Iron. {ECO:0000250}.; METAL 329 329 Iron. {ECO:0000250}.
Q28056	1.14.11.16	BINDING 621 621 2-oxoglutarate. {ECO:0000250|UniProtKB:Q12797}.; BINDING 664 664 2-oxoglutarate. {ECO:0000250|UniProtKB:Q12797}.; BINDING 731 731 2-oxoglutarate. {ECO:0000250|UniProtKB:Q12797}.	Aspartyl/asparaginyl beta-hydroxylase (EC 1.14.11.16) (Aspartate beta-hydroxylase) (ASP beta-hydroxylase) (Peptide-aspartate beta-dioxygenase)	ASPH	Bos taurus (Bovine)	SUBCELLULAR LOCATION: Endoplasmic reticulum membrane; Single-pass type II membrane protein {ECO:0000303|PubMed:1378441}.	COFACTOR: Name=Fe cation; Xref=ChEBI:CHEBI:24875; Evidence={ECO:0000269|PubMed:1856229};	METAL 675 675 Iron. {ECO:0000250|UniProtKB:Q12797}.; METAL 721 721 Iron. {ECO:0000250|UniProtKB:Q12797}.	Q28056;
Q12797	1.14.11.16	BINDING 625 625 2-oxoglutarate. {ECO:0000269|Ref.17}.; BINDING 668 668 2-oxoglutarate. {ECO:0000269|Ref.17}.; BINDING 735 735 2-oxoglutarate. {ECO:0000269|Ref.17}.	Aspartyl/asparaginyl beta-hydroxylase (EC 1.14.11.16) (Aspartate beta-hydroxylase) (ASP beta-hydroxylase) (Peptide-aspartate beta-dioxygenase)	ASPH BAH	Homo sapiens (Human)	SUBCELLULAR LOCATION: Isoform 1: Endoplasmic reticulum membrane; Single-pass type II membrane protein {ECO:0000250|UniProtKB:Q28056}.; SUBCELLULAR LOCATION: Isoform 4: Sarcoplasmic reticulum membrane; Single-pass type II membrane protein {ECO:0000305|PubMed:15485681}.; SUBCELLULAR LOCATION: Isoform 8: Endoplasmic reticulum membrane; Single-pass type II membrane protein {ECO:0000269|PubMed:2258610…	COFACTOR: Name=Fe cation; Xref=ChEBI:CHEBI:24875; Evidence={ECO:0000250|UniProtKB:Q28056};	METAL 679 679 Iron. {ECO:0000305}.; METAL 725 725 Iron. {ECO:0000305}.	Q12797;
Q8BSY0	1.14.11.16	BINDING 608 608 2-oxoglutarate. {ECO:0000250|UniProtKB:Q12797}.; BINDING 651 651 2-oxoglutarate. {ECO:0000250|UniProtKB:Q12797}.; BINDING 718 718 2-oxoglutarate. {ECO:0000250|UniProtKB:Q12797}.	Aspartyl/asparaginyl beta-hydroxylase (EC 1.14.11.16) (Aspartate beta-hydroxylase) (ASP beta-hydroxylase) (Peptide-aspartate beta-dioxygenase)	Asph Bah	Mus musculus (Mouse)	SUBCELLULAR LOCATION: Isoform 1: Endoplasmic reticulum membrane {ECO:0000250|UniProtKB:Q28056}; Single-pass type II membrane protein {ECO:0000250|UniProtKB:Q28056}.; SUBCELLULAR LOCATION: Isoform 2: Sarcoplasmic reticulum membrane {ECO:0000269|PubMed:8530521}; Single-pass type II membrane protein {ECO:0000303|PubMed:8530521}.	COFACTOR: Name=Fe cation; Xref=ChEBI:CHEBI:24875; Evidence={ECO:0000250|UniProtKB:Q12797};	METAL 662 662 Iron. {ECO:0000250|UniProtKB:Q12797}.; METAL 708 708 Iron. {ECO:0000250|UniProtKB:Q12797}.	Q8BSY0;
Q0V1P1	3.1.1.3		Putative lipase ATG15-1 (EC 3.1.1.3) (Autophagy-related protein 15)	ATG15-1 SNOG_02073	Phaeosphaeria nodorum (strain SN15 / ATCC MYA-4574 / FGSC 10173) (Glume blotch fungus) (Septoria nodorum)	SUBCELLULAR LOCATION: Endoplasmic reticulum membrane {ECO:0000250}; Single-pass type II membrane protein {ECO:0000250}. Golgi apparatus membrane {ECO:0000250}; Single-pass type II membrane protein {ECO:0000250}. Endosome, multivesicular body membrane {ECO:0000250}; Single-pass type II membrane protein {ECO:0000250}. Prevacuolar compartment membrane {ECO:0000250}; Single-pass type II membrane prot…			Q0V1P1;
Q8VZ52	6.3.2.-		Ubiquitin-like-conjugating enzyme ATG10 (EC 6.3.2.-) (Autophagy-related protein 10) (AtATG10)	ATG10 At3g07525 F21O3	Arabidopsis thaliana (Mouse-ear cress)	SUBCELLULAR LOCATION: Membrane {ECO:0000305}; Single-pass membrane protein {ECO:0000305}.			Q8VZ52;
A6REI4	3.1.1.3		Putative lipase ATG15 (EC 3.1.1.3) (Autophagy-related protein 15)	ATG15 HCAG_08049	Ajellomyces capsulatus (strain NAm1 / WU24) (Darling's disease fungus) (Histoplasma capsulatum)	SUBCELLULAR LOCATION: Endoplasmic reticulum membrane {ECO:0000250}; Single-pass type II membrane protein {ECO:0000250}. Golgi apparatus membrane {ECO:0000250}; Single-pass type II membrane protein {ECO:0000250}. Endosome, multivesicular body membrane {ECO:0000250}; Single-pass type II membrane protein {ECO:0000250}. Prevacuolar compartment membrane {ECO:0000250}; Single-pass type II membrane prot…			A6REI4;
Q75EN3	3.1.1.3		Putative lipase ATG15 (EC 3.1.1.3) (Autophagy-related protein 15)	ATG15 AAR046C	Ashbya gossypii (strain ATCC 10895 / CBS 109.51 / FGSC 9923 / NRRL Y-1056) (Yeast) (Eremothecium gossypii)	SUBCELLULAR LOCATION: Endoplasmic reticulum membrane {ECO:0000250}; Single-pass type II membrane protein {ECO:0000250}. Golgi apparatus membrane {ECO:0000250}; Single-pass type II membrane protein {ECO:0000250}. Endosome, multivesicular body membrane {ECO:0000250}; Single-pass type II membrane protein {ECO:0000250}. Prevacuolar compartment membrane {ECO:0000250}; Single-pass type II membrane prot…			Q75EN3;
A1C6D6	3.1.1.3		Putative lipase atg15 (EC 3.1.1.3) (Autophagy-related protein 15)	atg15 ACLA_069880	Aspergillus clavatus (strain ATCC 1007 / CBS 513.65 / DSM 816 / NCTC 3887 / NRRL 1)	SUBCELLULAR LOCATION: Endoplasmic reticulum membrane {ECO:0000250}; Single-pass type II membrane protein {ECO:0000250}. Golgi apparatus membrane {ECO:0000250}; Single-pass type II membrane protein {ECO:0000250}. Endosome, multivesicular body membrane {ECO:0000250}; Single-pass type II membrane protein {ECO:0000250}. Prevacuolar compartment membrane {ECO:0000250}; Single-pass type II membrane prot…			A1C6D6;
Q4X180	3.1.1.3		Putative lipase atg15 (EC 3.1.1.3) (Autophagy-related protein 15)	atg15 AFUA_2G10900	Neosartorya fumigata (strain ATCC MYA-4609 / Af293 / CBS 101355 / FGSC A1100) (Aspergillus fumigatus)	SUBCELLULAR LOCATION: Endoplasmic reticulum membrane {ECO:0000250}; Single-pass type II membrane protein {ECO:0000250}. Golgi apparatus membrane {ECO:0000250}; Single-pass type II membrane protein {ECO:0000250}. Endosome, multivesicular body membrane {ECO:0000250}; Single-pass type II membrane protein {ECO:0000250}. Prevacuolar compartment membrane {ECO:0000250}; Single-pass type II membrane prot…			Q4X180;
A2QGD9	3.1.1.3		Putative lipase atg15 (EC 3.1.1.3) (Autophagy-related protein 15)	atg15 An03g02820	Aspergillus niger (strain CBS 513.88 / FGSC A1513)	SUBCELLULAR LOCATION: Endoplasmic reticulum membrane {ECO:0000250}; Single-pass type II membrane protein {ECO:0000250}. Golgi apparatus membrane {ECO:0000250}; Single-pass type II membrane protein {ECO:0000250}. Endosome, multivesicular body membrane {ECO:0000250}; Single-pass type II membrane protein {ECO:0000250}. Prevacuolar compartment membrane {ECO:0000250}; Single-pass type II membrane prot…			A2QGD9;
Q0CXU6	3.1.1.3		Putative lipase atg15 (EC 3.1.1.3) (Autophagy-related protein 15)	atg15 ATEG_01488	Aspergillus terreus (strain NIH 2624 / FGSC A1156)	SUBCELLULAR LOCATION: Endoplasmic reticulum membrane {ECO:0000250}; Single-pass type II membrane protein {ECO:0000250}. Golgi apparatus membrane {ECO:0000250}; Single-pass type II membrane protein {ECO:0000250}. Endosome, multivesicular body membrane {ECO:0000250}; Single-pass type II membrane protein {ECO:0000250}. Prevacuolar compartment membrane {ECO:0000250}; Single-pass type II membrane prot…			Q0CXU6;
Q5A4N0	3.1.1.3		Putative lipase ATG15 (EC 3.1.1.3) (Autophagy-related protein 15)	ATG15 Ca20C1.17 CaO19.10915 CaO19.3412	Candida albicans (strain SC5314 / ATCC MYA-2876) (Yeast)	SUBCELLULAR LOCATION: Endoplasmic reticulum membrane {ECO:0000250}; Single-pass type II membrane protein {ECO:0000250}. Golgi apparatus membrane {ECO:0000250}; Single-pass type II membrane protein {ECO:0000250}. Endosome, multivesicular body membrane {ECO:0000250}; Single-pass type II membrane protein {ECO:0000250}. Prevacuolar compartment membrane {ECO:0000250}; Single-pass type II membrane prot…			Q5A4N0;
Q6FPI6	3.1.1.3		Putative lipase ATG15 (EC 3.1.1.3) (Autophagy-related protein 15)	ATG15 CAGL0J03542g	Candida glabrata (strain ATCC 2001 / CBS 138 / JCM 3761 / NBRC 0622 / NRRL Y-65) (Yeast) (Torulopsis glabrata)	SUBCELLULAR LOCATION: Endoplasmic reticulum membrane {ECO:0000250}; Single-pass type II membrane protein {ECO:0000250}. Golgi apparatus membrane {ECO:0000250}; Single-pass type II membrane protein {ECO:0000250}. Endosome, multivesicular body membrane {ECO:0000250}; Single-pass type II membrane protein {ECO:0000250}. Prevacuolar compartment membrane {ECO:0000250}; Single-pass type II membrane prot…			Q6FPI6;
Q2H6M8	3.1.1.3		Putative lipase atg15 (EC 3.1.1.3) (Autophagy-related protein 15)	atg15 CHGG_05687	Chaetomium globosum (strain ATCC 6205 / CBS 148.51 / DSM 1962 / NBRC 6347 / NRRL 1970) (Soil fungus)	SUBCELLULAR LOCATION: Endoplasmic reticulum membrane {ECO:0000250}; Single-pass type II membrane protein {ECO:0000250}. Golgi apparatus membrane {ECO:0000250}; Single-pass type II membrane protein {ECO:0000250}. Endosome, multivesicular body membrane {ECO:0000250}; Single-pass type II membrane protein {ECO:0000250}. Prevacuolar compartment membrane {ECO:0000250}; Single-pass type II membrane prot…			Q2H6M8;
Q1DZE0	3.1.1.3		Putative lipase ATG15 (EC 3.1.1.3) (Autophagy-related protein 15)	ATG15 CIMG_04323	Coccidioides immitis (strain RS) (Valley fever fungus)	SUBCELLULAR LOCATION: Endoplasmic reticulum membrane {ECO:0000250}; Single-pass type II membrane protein {ECO:0000250}. Golgi apparatus membrane {ECO:0000250}; Single-pass type II membrane protein {ECO:0000250}. Endosome, multivesicular body membrane {ECO:0000250}; Single-pass type II membrane protein {ECO:0000250}. Prevacuolar compartment membrane {ECO:0000250}; Single-pass type II membrane prot…
P0CO61	3.1.1.3		Putative lipase ATG15 (EC 3.1.1.3) (Autophagy-related protein 15)	ATG15 CNBC6140	Cryptococcus neoformans var. neoformans serotype D (strain B-3501A) (Filobasidiella neoformans)	SUBCELLULAR LOCATION: Endoplasmic reticulum membrane {ECO:0000250}; Single-pass type II membrane protein {ECO:0000250}. Golgi apparatus membrane {ECO:0000250}; Single-pass type II membrane protein {ECO:0000250}. Endosome, multivesicular body membrane {ECO:0000250}; Single-pass type II membrane protein {ECO:0000250}. Prevacuolar compartment membrane {ECO:0000250}; Single-pass type II membrane prot…
P0CO60	3.1.1.3		Putative lipase ATG15 (EC 3.1.1.3) (Autophagy-related protein 15)	ATG15 CNC01140	Cryptococcus neoformans var. neoformans serotype D (strain JEC21 / ATCC MYA-565) (Filobasidiella neoformans)	SUBCELLULAR LOCATION: Endoplasmic reticulum membrane {ECO:0000250}; Single-pass type II membrane protein {ECO:0000250}. Golgi apparatus membrane {ECO:0000250}; Single-pass type II membrane protein {ECO:0000250}. Endosome, multivesicular body membrane {ECO:0000250}; Single-pass type II membrane protein {ECO:0000250}. Prevacuolar compartment membrane {ECO:0000250}; Single-pass type II membrane prot…			P0CO60;
Q6BLM0	3.1.1.3		Putative lipase ATG15 (EC 3.1.1.3) (Autophagy-related protein 15)	ATG15 DEHA2F12364g	Debaryomyces hansenii (strain ATCC 36239 / CBS 767 / JCM 1990 / NBRC 0083 / IGC 2968) (Yeast) (Torulaspora hansenii)	SUBCELLULAR LOCATION: Endoplasmic reticulum membrane {ECO:0000250}; Single-pass type II membrane protein {ECO:0000250}. Golgi apparatus membrane {ECO:0000250}; Single-pass type II membrane protein {ECO:0000250}. Endosome, multivesicular body membrane {ECO:0000250}; Single-pass type II membrane protein {ECO:0000250}. Prevacuolar compartment membrane {ECO:0000250}; Single-pass type II membrane prot…
Q5B0L1	3.1.1.3		Putative lipase atg15 (EC 3.1.1.3) (Autophagy-related protein 15)	atg15 AN5919	Emericella nidulans (strain FGSC A4 / ATCC 38163 / CBS 112.46 / NRRL 194 / M139) (Aspergillus nidulans)	SUBCELLULAR LOCATION: Endoplasmic reticulum membrane {ECO:0000250}; Single-pass type II membrane protein {ECO:0000250}. Golgi apparatus membrane {ECO:0000250}; Single-pass type II membrane protein {ECO:0000250}. Endosome, multivesicular body membrane {ECO:0000250}; Single-pass type II membrane protein {ECO:0000250}. Prevacuolar compartment membrane {ECO:0000250}; Single-pass type II membrane prot…
Q6CU02	3.1.1.3		Putative lipase ATG15 (EC 3.1.1.3) (Autophagy-related protein 15)	ATG15 KLLA0C08679g	Kluyveromyces lactis (strain ATCC 8585 / CBS 2359 / DSM 70799 / NBRC 1267 / NRRL Y-1140 / WM37) (Yeast) (Candida sphaerica)	SUBCELLULAR LOCATION: Endoplasmic reticulum membrane {ECO:0000250}; Single-pass type II membrane protein {ECO:0000250}. Golgi apparatus membrane {ECO:0000250}; Single-pass type II membrane protein {ECO:0000250}. Endosome, multivesicular body membrane {ECO:0000250}; Single-pass type II membrane protein {ECO:0000250}. Prevacuolar compartment membrane {ECO:0000250}; Single-pass type II membrane prot…			Q6CU02;
A5E567	3.1.1.3		Putative lipase ATG15 (EC 3.1.1.3) (Autophagy-related protein 15)	ATG15 LELG_04756	Lodderomyces elongisporus (strain ATCC 11503 / CBS 2605 / JCM 1781 / NBRC 1676 / NRRL YB-4239) (Yeast) (Saccharomyces elongisporus)	SUBCELLULAR LOCATION: Endoplasmic reticulum membrane {ECO:0000250}; Single-pass type II membrane protein {ECO:0000250}. Golgi apparatus membrane {ECO:0000250}; Single-pass type II membrane protein {ECO:0000250}. Endosome, multivesicular body membrane {ECO:0000250}; Single-pass type II membrane protein {ECO:0000250}. Prevacuolar compartment membrane {ECO:0000250}; Single-pass type II membrane prot…			A5E567;
A1DH10	3.1.1.3		Putative lipase atg15 (EC 3.1.1.3) (Autophagy-related protein 15)	atg15 NFIA_086220	Neosartorya fischeri (strain ATCC 1020 / DSM 3700 / FGSC A1164 / NRRL 181) (Aspergillus fischerianus)	SUBCELLULAR LOCATION: Endoplasmic reticulum membrane {ECO:0000250}; Single-pass type II membrane protein {ECO:0000250}. Golgi apparatus membrane {ECO:0000250}; Single-pass type II membrane protein {ECO:0000250}. Endosome, multivesicular body membrane {ECO:0000250}; Single-pass type II membrane protein {ECO:0000250}. Prevacuolar compartment membrane {ECO:0000250}; Single-pass type II membrane prot…			A1DH10;
Q7RYY1	3.1.1.3		Putative lipase atg15 (EC 3.1.1.3) (Autophagy-related protein 15)	atg15 NCU06436	Neurospora crassa (strain ATCC 24698 / 74-OR23-1A / CBS 708.71 / DSM 1257 / FGSC 987)	SUBCELLULAR LOCATION: Endoplasmic reticulum membrane {ECO:0000250}; Single-pass type II membrane protein {ECO:0000250}. Golgi apparatus membrane {ECO:0000250}; Single-pass type II membrane protein {ECO:0000250}. Endosome, multivesicular body membrane {ECO:0000250}; Single-pass type II membrane protein {ECO:0000250}. Prevacuolar compartment membrane {ECO:0000250}; Single-pass type II membrane prot…
O13444	3.1.1.3		Putative lipase ATG15 (EC 3.1.1.3) (Autophagy-related protein 15)	ATG15 pSI-7	Passalora fulva (Tomato leaf mold) (Cladosporium fulvum)	SUBCELLULAR LOCATION: Endoplasmic reticulum membrane {ECO:0000250}; Single-pass type II membrane protein {ECO:0000250}. Golgi apparatus membrane {ECO:0000250}; Single-pass type II membrane protein {ECO:0000250}. Endosome, multivesicular body membrane {ECO:0000250}; Single-pass type II membrane protein {ECO:0000250}. Prevacuolar compartment membrane {ECO:0000250}; Single-pass type II membrane prot…			O13444;
A7KAM5	3.1.1.3		Putative lipase atg15 (EC 3.1.1.3) (Autophagy-related protein 15)	atg15 Pc22g21230	Penicillium chrysogenum (strain ATCC 28089 / DSM 1075 / Wisconsin 54-1255) (Penicillium notatum)	SUBCELLULAR LOCATION: Endoplasmic reticulum membrane {ECO:0000250}; Single-pass type II membrane protein {ECO:0000250}. Golgi apparatus membrane {ECO:0000250}; Single-pass type II membrane protein {ECO:0000250}. Endosome, multivesicular body membrane {ECO:0000250}; Single-pass type II membrane protein {ECO:0000250}. Prevacuolar compartment membrane {ECO:0000250}; Single-pass type II membrane prot…			A7KAM5;
A7KAJ9	3.1.1.3		Putative lipase ATG15 (EC 3.1.1.3) (Autophagy-related protein 15)	ATG15	Pichia angusta (Yeast) (Hansenula polymorpha)	SUBCELLULAR LOCATION: Endoplasmic reticulum membrane {ECO:0000250}; Single-pass type II membrane protein {ECO:0000250}. Golgi apparatus membrane {ECO:0000250}; Single-pass type II membrane protein {ECO:0000250}. Endosome, multivesicular body membrane {ECO:0000250}; Single-pass type II membrane protein {ECO:0000250}. Prevacuolar compartment membrane {ECO:0000250}; Single-pass type II membrane prot…			A7KAJ9;
A5DC90	3.1.1.3		Putative lipase ATG15 (EC 3.1.1.3) (Autophagy-related protein 15)	ATG15 PGUG_00895	Meyerozyma guilliermondii (strain ATCC 6260 / CBS 566 / DSM 6381 / JCM 1539 / NBRC 10279 / NRRL Y-324) (Yeast) (Candida guilliermondii)	SUBCELLULAR LOCATION: Endoplasmic reticulum membrane {ECO:0000250}; Single-pass type II membrane protein {ECO:0000250}. Golgi apparatus membrane {ECO:0000250}; Single-pass type II membrane protein {ECO:0000250}. Endosome, multivesicular body membrane {ECO:0000250}; Single-pass type II membrane protein {ECO:0000250}. Prevacuolar compartment membrane {ECO:0000250}; Single-pass type II membrane prot…
A3LV34	3.1.1.3		Putative lipase ATG15 (EC 3.1.1.3) (Autophagy-related protein 15)	ATG15 PICST_89908	Scheffersomyces stipitis (strain ATCC 58785 / CBS 6054 / NBRC 10063 / NRRL Y-11545) (Yeast) (Pichia stipitis)	SUBCELLULAR LOCATION: Endoplasmic reticulum membrane {ECO:0000250}; Single-pass type II membrane protein {ECO:0000250}. Golgi apparatus membrane {ECO:0000250}; Single-pass type II membrane protein {ECO:0000250}. Endosome, multivesicular body membrane {ECO:0000250}; Single-pass type II membrane protein {ECO:0000250}. Prevacuolar compartment membrane {ECO:0000250}; Single-pass type II membrane prot…			A3LV34;
O13934	3.1.1.3		Putative lipase atg15 (EC 3.1.1.3) (Autophagy-related protein 15)	atg15 SPAC23C4.16c	Schizosaccharomyces pombe (strain 972 / ATCC 24843) (Fission yeast)	SUBCELLULAR LOCATION: Endoplasmic reticulum membrane {ECO:0000250}; Single-pass type II membrane protein {ECO:0000250}. Golgi apparatus membrane {ECO:0000250}; Single-pass type II membrane protein {ECO:0000250}. Endosome, multivesicular body membrane {ECO:0000250}; Single-pass type II membrane protein {ECO:0000250}. Prevacuolar compartment membrane {ECO:0000250}; Single-pass type II membrane prot…			O13934;
Q4PHZ2	3.1.1.3		Putative lipase ATG15 (EC 3.1.1.3) (Autophagy-related protein 15)	ATG15 UM00271	Ustilago maydis (strain 521 / FGSC 9021) (Corn smut fungus)	SUBCELLULAR LOCATION: Endoplasmic reticulum membrane {ECO:0000250}; Single-pass type II membrane protein {ECO:0000250}. Golgi apparatus membrane {ECO:0000250}; Single-pass type II membrane protein {ECO:0000250}. Endosome, multivesicular body membrane {ECO:0000250}; Single-pass type II membrane protein {ECO:0000250}. Prevacuolar compartment membrane {ECO:0000250}; Single-pass type II membrane prot…			Q4PHZ2;
A7TG13	3.1.1.3		Putative lipase ATG15 (EC 3.1.1.3) (Autophagy-related protein 15)	ATG15 Kpol_1028p44	Vanderwaltozyma polyspora (strain ATCC 22028 / DSM 70294) (Kluyveromyces polysporus)	SUBCELLULAR LOCATION: Endoplasmic reticulum membrane {ECO:0000250}; Single-pass type II membrane protein {ECO:0000250}. Golgi apparatus membrane {ECO:0000250}; Single-pass type II membrane protein {ECO:0000250}. Endosome, multivesicular body membrane {ECO:0000250}; Single-pass type II membrane protein {ECO:0000250}. Prevacuolar compartment membrane {ECO:0000250}; Single-pass type II membrane prot…			A7TG13;
Q6C2N7	3.1.1.3		Putative lipase ATG15 (EC 3.1.1.3) (Autophagy-related protein 15)	ATG15 YALI0F06358g	Yarrowia lipolytica (strain CLIB 122 / E 150) (Yeast) (Candida lipolytica)	SUBCELLULAR LOCATION: Endoplasmic reticulum membrane {ECO:0000250}; Single-pass type II membrane protein {ECO:0000250}. Golgi apparatus membrane {ECO:0000250}; Single-pass type II membrane protein {ECO:0000250}. Endosome, multivesicular body membrane {ECO:0000250}; Single-pass type II membrane protein {ECO:0000250}. Prevacuolar compartment membrane {ECO:0000250}; Single-pass type II membrane prot…			Q6C2N7;
A6ZTP2	3.1.1.3		Putative lipase ATG15 (EC 3.1.1.3) (Autophagy-related protein 15) (Cytoplasm to vacuole targeting protein 17)	ATG15 AUT5 CVT17 SCY_0635	Saccharomyces cerevisiae (strain YJM789) (Baker's yeast)	SUBCELLULAR LOCATION: Endoplasmic reticulum membrane {ECO:0000250}; Single-pass type II membrane protein {ECO:0000250}. Golgi apparatus membrane {ECO:0000250}; Single-pass type II membrane protein {ECO:0000250}. Endosome, multivesicular body membrane {ECO:0000250}; Single-pass type II membrane protein {ECO:0000250}. Prevacuolar compartment membrane {ECO:0000250}; Single-pass type II membrane prot…			A6ZTP2;
P25641	3.1.1.3		Putative lipase ATG15 (EC 3.1.1.3) (Autophagy-related protein 15) (Cytoplasm to vacuole targeting protein 17)	ATG15 AUT5 CVT17 YCR068W YCR68W	Saccharomyces cerevisiae (strain ATCC 204508 / S288c) (Baker's yeast)	SUBCELLULAR LOCATION: Endoplasmic reticulum membrane; Single-pass type II membrane protein. Golgi apparatus membrane; Single-pass type II membrane protein. Endosome, multivesicular body membrane; Single-pass type II membrane protein. Prevacuolar compartment membrane; Single-pass type II membrane protein. Note=From ER, targeted to vacuolar lumen at the MVB vesicles via the Golgi and the prevacuola…			P25641;
Q8YSD7	3.6.3.12		Potassium-transporting ATPase C chain 1 (EC 3.6.3.12) (ATP phosphohydrolase [potassium-transporting] C chain 1) (Potassium-binding and translocating subunit C 1) (Potassium-translocating ATPase C chain 1)	kdpC1 all3151	Nostoc sp. (strain PCC 7120 / UTEX 2576)	SUBCELLULAR LOCATION: Cell inner membrane {ECO:0000250}; Single-pass membrane protein {ECO:0000250}.			Q8YSD7;
P65213	3.6.3.12		Potassium-transporting ATPase C chain 1 (EC 3.6.3.12) (ATP phosphohydrolase [potassium-transporting] C chain 1) (Potassium-binding and translocating subunit C 1) (Potassium-translocating ATPase C chain 1)	kdpC1 SAV2075	Staphylococcus aureus (strain Mu50 / ATCC 700699)	SUBCELLULAR LOCATION: Cell membrane {ECO:0000250}; Single-pass membrane protein {ECO:0000250}.
P65214	3.6.3.12		Potassium-transporting ATPase C chain 1 (EC 3.6.3.12) (ATP phosphohydrolase [potassium-transporting] C chain 1) (Potassium-binding and translocating subunit C 1) (Potassium-translocating ATPase C chain 1)	kdpC1 SA1879	Staphylococcus aureus (strain N315)	SUBCELLULAR LOCATION: Cell membrane {ECO:0000250}; Single-pass membrane protein {ECO:0000250}.
Q8YPF1	3.6.3.12		Potassium-transporting ATPase C chain 2 (EC 3.6.3.12) (ATP phosphohydrolase [potassium-transporting] C chain 2) (Potassium-binding and translocating subunit C 2) (Potassium-translocating ATPase C chain 2)	kdpC2 all4243	Nostoc sp. (strain PCC 7120 / UTEX 2576)	SUBCELLULAR LOCATION: Cell inner membrane {ECO:0000250}; Single-pass membrane protein {ECO:0000250}.
P0A059	3.6.3.12		Potassium-transporting ATPase C chain 2 (EC 3.6.3.12) (ATP phosphohydrolase [potassium-transporting] C chain 2) (Potassium-binding and translocating subunit C 2) (Potassium-translocating ATPase C chain 2)	kdpC2 SAV0074	Staphylococcus aureus (strain Mu50 / ATCC 700699)	SUBCELLULAR LOCATION: Cell membrane {ECO:0000250}; Single-pass membrane protein {ECO:0000250}.
P0A060	3.6.3.12		Potassium-transporting ATPase C chain 2 (EC 3.6.3.12) (ATP phosphohydrolase [potassium-transporting] C chain 2) (Potassium-binding and translocating subunit C 2) (Potassium-translocating ATPase C chain 2)	kdpC2	Staphylococcus aureus	SUBCELLULAR LOCATION: Cell membrane {ECO:0000250}; Single-pass membrane protein {ECO:0000250}.
C1F0T4	3.6.3.12		Potassium-transporting ATPase C chain (EC 3.6.3.12) (ATP phosphohydrolase [potassium-transporting] C chain) (Potassium-binding and translocating subunit C) (Potassium-translocating ATPase C chain)	kdpC ACP_0431	Acidobacterium capsulatum (strain ATCC 51196 / DSM 11244 / JCM 7670)	SUBCELLULAR LOCATION: Cell inner membrane {ECO:0000255|HAMAP-Rule:MF_00276}; Single-pass membrane protein {ECO:0000255|HAMAP-Rule:MF_00276}.
B9JKQ9	3.6.3.12		Potassium-transporting ATPase C chain (EC 3.6.3.12) (ATP phosphohydrolase [potassium-transporting] C chain) (Potassium-binding and translocating subunit C) (Potassium-translocating ATPase C chain)	kdpC Arad_9464	Agrobacterium radiobacter (strain K84 / ATCC BAA-868)	SUBCELLULAR LOCATION: Cell inner membrane {ECO:0000255|HAMAP-Rule:MF_00276}; Single-pass membrane protein {ECO:0000255|HAMAP-Rule:MF_00276}.
Q8U9E0	3.6.3.12		Potassium-transporting ATPase C chain (EC 3.6.3.12) (ATP phosphohydrolase [potassium-transporting] C chain) (Potassium-binding and translocating subunit C) (Potassium-translocating ATPase C chain)	kdpC Atu3788 AGR_L_2092	Agrobacterium tumefaciens (strain C58 / ATCC 33970)	SUBCELLULAR LOCATION: Cell inner membrane {ECO:0000255|HAMAP-Rule:MF_00276}; Single-pass membrane protein {ECO:0000255|HAMAP-Rule:MF_00276}.			Q8U9E0;
B9K2I1	3.6.3.12		Potassium-transporting ATPase C chain (EC 3.6.3.12) (ATP phosphohydrolase [potassium-transporting] C chain) (Potassium-binding and translocating subunit C) (Potassium-translocating ATPase C chain)	kdpC Avi_6072	Agrobacterium vitis (strain S4 / ATCC BAA-846) (Rhizobium vitis (strain S4))	SUBCELLULAR LOCATION: Cell inner membrane {ECO:0000255|HAMAP-Rule:MF_00276}; Single-pass membrane protein {ECO:0000255|HAMAP-Rule:MF_00276}.
Q9R6W9	3.6.3.12		Potassium-transporting ATPase C chain (EC 3.6.3.12) (ATP phosphohydrolase [potassium-transporting] C chain) (Potassium-binding and translocating subunit C) (Potassium-translocating ATPase C chain)	kdpC	Anabaena sp. (strain L31)	SUBCELLULAR LOCATION: Cell inner membrane {ECO:0000250}; Single-pass membrane protein {ECO:0000250}.
A8HY21	3.6.3.12		Potassium-transporting ATPase C chain (EC 3.6.3.12) (ATP phosphohydrolase [potassium-transporting] C chain) (Potassium-binding and translocating subunit C) (Potassium-translocating ATPase C chain)	kdpC AZC_1567	Azorhizobium caulinodans (strain ATCC 43989 / DSM 5975 / ORS 571)	SUBCELLULAR LOCATION: Cell inner membrane {ECO:0000255|HAMAP-Rule:MF_00276}; Single-pass membrane protein {ECO:0000255|HAMAP-Rule:MF_00276}.
C3P0M1	3.6.3.12		Potassium-transporting ATPase C chain (EC 3.6.3.12) (ATP phosphohydrolase [potassium-transporting] C chain) (Potassium-binding and translocating subunit C) (Potassium-translocating ATPase C chain)	kdpC BAA_0849	Bacillus anthracis (strain A0248)	SUBCELLULAR LOCATION: Cell membrane {ECO:0000255|HAMAP-Rule:MF_00276}; Single-pass membrane protein {ECO:0000255|HAMAP-Rule:MF_00276}.
C3LF98	3.6.3.12		Potassium-transporting ATPase C chain (EC 3.6.3.12) (ATP phosphohydrolase [potassium-transporting] C chain) (Potassium-binding and translocating subunit C) (Potassium-translocating ATPase C chain)	kdpC BAMEG_3817	Bacillus anthracis (strain CDC 684 / NRRL 3495)	SUBCELLULAR LOCATION: Cell membrane {ECO:0000255|HAMAP-Rule:MF_00276}; Single-pass membrane protein {ECO:0000255|HAMAP-Rule:MF_00276}.
Q81UW5	3.6.3.12		Potassium-transporting ATPase C chain (EC 3.6.3.12) (ATP phosphohydrolase [potassium-transporting] C chain) (Potassium-binding and translocating subunit C) (Potassium-translocating ATPase C chain)	kdpC BA_0741 GBAA_0741 BAS0705	Bacillus anthracis	SUBCELLULAR LOCATION: Cell membrane {ECO:0000255|HAMAP-Rule:MF_00276}; Single-pass membrane protein {ECO:0000255|HAMAP-Rule:MF_00276}.
B7JRB9	3.6.3.12		Potassium-transporting ATPase C chain (EC 3.6.3.12) (ATP phosphohydrolase [potassium-transporting] C chain) (Potassium-binding and translocating subunit C) (Potassium-translocating ATPase C chain)	kdpC BCAH820_0817	Bacillus cereus (strain AH820)	SUBCELLULAR LOCATION: Cell membrane {ECO:0000255|HAMAP-Rule:MF_00276}; Single-pass membrane protein {ECO:0000255|HAMAP-Rule:MF_00276}.
Q73DA2	3.6.3.12		Potassium-transporting ATPase C chain (EC 3.6.3.12) (ATP phosphohydrolase [potassium-transporting] C chain) (Potassium-binding and translocating subunit C) (Potassium-translocating ATPase C chain)	kdpC BCE_0811	Bacillus cereus (strain ATCC 10987)	SUBCELLULAR LOCATION: Cell membrane {ECO:0000255|HAMAP-Rule:MF_00276}; Single-pass membrane protein {ECO:0000255|HAMAP-Rule:MF_00276}.
B7II10	3.6.3.12		Potassium-transporting ATPase C chain (EC 3.6.3.12) (ATP phosphohydrolase [potassium-transporting] C chain) (Potassium-binding and translocating subunit C) (Potassium-translocating ATPase C chain)	kdpC BCG9842_B4532	Bacillus cereus (strain G9842)	SUBCELLULAR LOCATION: Cell membrane {ECO:0000255|HAMAP-Rule:MF_00276}; Single-pass membrane protein {ECO:0000255|HAMAP-Rule:MF_00276}.
C1EYK1	3.6.3.12		Potassium-transporting ATPase C chain (EC 3.6.3.12) (ATP phosphohydrolase [potassium-transporting] C chain) (Potassium-binding and translocating subunit C) (Potassium-translocating ATPase C chain)	kdpC BCA_0805	Bacillus cereus (strain 03BB102)	SUBCELLULAR LOCATION: Cell membrane {ECO:0000255|HAMAP-Rule:MF_00276}; Single-pass membrane protein {ECO:0000255|HAMAP-Rule:MF_00276}.
B7HDG0	3.6.3.12		Potassium-transporting ATPase C chain (EC 3.6.3.12) (ATP phosphohydrolase [potassium-transporting] C chain) (Potassium-binding and translocating subunit C) (Potassium-translocating ATPase C chain)	kdpC BCB4264_A0799	Bacillus cereus (strain B4264)	SUBCELLULAR LOCATION: Cell membrane {ECO:0000255|HAMAP-Rule:MF_00276}; Single-pass membrane protein {ECO:0000255|HAMAP-Rule:MF_00276}.
B7HWG2	3.6.3.12		Potassium-transporting ATPase C chain (EC 3.6.3.12) (ATP phosphohydrolase [potassium-transporting] C chain) (Potassium-binding and translocating subunit C) (Potassium-translocating ATPase C chain)	kdpC BCAH187_A0896	Bacillus cereus (strain AH187)	SUBCELLULAR LOCATION: Cell membrane {ECO:0000255|HAMAP-Rule:MF_00276}; Single-pass membrane protein {ECO:0000255|HAMAP-Rule:MF_00276}.
A7GLG5	3.6.3.12		Potassium-transporting ATPase C chain (EC 3.6.3.12) (ATP phosphohydrolase [potassium-transporting] C chain) (Potassium-binding and translocating subunit C) (Potassium-translocating ATPase C chain)	kdpC Bcer98_0626	Bacillus cereus subsp. cytotoxis (strain NVH 391-98)	SUBCELLULAR LOCATION: Cell membrane {ECO:0000255|HAMAP-Rule:MF_00276}; Single-pass membrane protein {ECO:0000255|HAMAP-Rule:MF_00276}.
B9IQY6	3.6.3.12		Potassium-transporting ATPase C chain (EC 3.6.3.12) (ATP phosphohydrolase [potassium-transporting] C chain) (Potassium-binding and translocating subunit C) (Potassium-translocating ATPase C chain)	kdpC BCQ_0831	Bacillus cereus (strain Q1)	SUBCELLULAR LOCATION: Cell membrane {ECO:0000255|HAMAP-Rule:MF_00276}; Single-pass membrane protein {ECO:0000255|HAMAP-Rule:MF_00276}.
Q81HP9	3.6.3.12		Potassium-transporting ATPase C chain (EC 3.6.3.12) (ATP phosphohydrolase [potassium-transporting] C chain) (Potassium-binding and translocating subunit C) (Potassium-translocating ATPase C chain)	kdpC BC_0755	Bacillus cereus (strain ATCC 14579 / DSM 31)	SUBCELLULAR LOCATION: Cell membrane {ECO:0000255|HAMAP-Rule:MF_00276}; Single-pass membrane protein {ECO:0000255|HAMAP-Rule:MF_00276}.
Q63FQ9	3.6.3.12		Potassium-transporting ATPase C chain (EC 3.6.3.12) (ATP phosphohydrolase [potassium-transporting] C chain) (Potassium-binding and translocating subunit C) (Potassium-translocating ATPase C chain)	kdpC BCE33L0648	Bacillus cereus (strain ZK / E33L)	SUBCELLULAR LOCATION: Cell membrane {ECO:0000255|HAMAP-Rule:MF_00276}; Single-pass membrane protein {ECO:0000255|HAMAP-Rule:MF_00276}.
Q5LHU5	3.6.3.12		Potassium-transporting ATPase C chain (EC 3.6.3.12) (ATP phosphohydrolase [potassium-transporting] C chain) (Potassium-binding and translocating subunit C) (Potassium-translocating ATPase C chain)	kdpC BF0530	Bacteroides fragilis (strain ATCC 25285 / NCTC 9343)	SUBCELLULAR LOCATION: Cell inner membrane {ECO:0000255|HAMAP-Rule:MF_00276}; Single-pass membrane protein {ECO:0000255|HAMAP-Rule:MF_00276}.
Q64YU7	3.6.3.12		Potassium-transporting ATPase C chain (EC 3.6.3.12) (ATP phosphohydrolase [potassium-transporting] C chain) (Potassium-binding and translocating subunit C) (Potassium-translocating ATPase C chain)	kdpC BF0580	Bacteroides fragilis (strain YCH46)	SUBCELLULAR LOCATION: Cell inner membrane {ECO:0000255|HAMAP-Rule:MF_00276}; Single-pass membrane protein {ECO:0000255|HAMAP-Rule:MF_00276}.
Q6HN77	3.6.3.12		Potassium-transporting ATPase C chain (EC 3.6.3.12) (ATP phosphohydrolase [potassium-transporting] C chain) (Potassium-binding and translocating subunit C) (Potassium-translocating ATPase C chain)	kdpC BT9727_0649	Bacillus thuringiensis subsp. konkukian (strain 97-27)	SUBCELLULAR LOCATION: Cell membrane {ECO:0000255|HAMAP-Rule:MF_00276}; Single-pass membrane protein {ECO:0000255|HAMAP-Rule:MF_00276}.
Q8A521	3.6.3.12		Potassium-transporting ATPase C chain (EC 3.6.3.12) (ATP phosphohydrolase [potassium-transporting] C chain) (Potassium-binding and translocating subunit C) (Potassium-translocating ATPase C chain)	kdpC BT_2423	Bacteroides thetaiotaomicron (strain ATCC 29148 / DSM 2079 / NCTC 10582 / E50 / VPI-5482)	SUBCELLULAR LOCATION: Cell inner membrane {ECO:0000255|HAMAP-Rule:MF_00276}; Single-pass membrane protein {ECO:0000255|HAMAP-Rule:MF_00276}.
A6L5D0	3.6.3.12		Potassium-transporting ATPase C chain (EC 3.6.3.12) (ATP phosphohydrolase [potassium-transporting] C chain) (Potassium-binding and translocating subunit C) (Potassium-translocating ATPase C chain)	kdpC BVU_3265	Bacteroides vulgatus (strain ATCC 8482 / DSM 1447 / NCTC 11154)	SUBCELLULAR LOCATION: Cell inner membrane {ECO:0000255|HAMAP-Rule:MF_00276}; Single-pass membrane protein {ECO:0000255|HAMAP-Rule:MF_00276}.
A9VFM2	3.6.3.12		Potassium-transporting ATPase C chain (EC 3.6.3.12) (ATP phosphohydrolase [potassium-transporting] C chain) (Potassium-binding and translocating subunit C) (Potassium-translocating ATPase C chain)	kdpC BcerKBAB4_0656	Bacillus weihenstephanensis (strain KBAB4)	SUBCELLULAR LOCATION: Cell membrane {ECO:0000255|HAMAP-Rule:MF_00276}; Single-pass membrane protein {ECO:0000255|HAMAP-Rule:MF_00276}.
B2IIP7	3.6.3.12		Potassium-transporting ATPase C chain (EC 3.6.3.12) (ATP phosphohydrolase [potassium-transporting] C chain) (Potassium-binding and translocating subunit C) (Potassium-translocating ATPase C chain)	kdpC Bind_1098	Beijerinckia indica subsp. indica (strain ATCC 9039 / DSM 1715 / NCIB 8712)	SUBCELLULAR LOCATION: Cell inner membrane {ECO:0000255|HAMAP-Rule:MF_00276}; Single-pass membrane protein {ECO:0000255|HAMAP-Rule:MF_00276}.
Q89FC4	3.6.3.12		Potassium-transporting ATPase C chain (EC 3.6.3.12) (ATP phosphohydrolase [potassium-transporting] C chain) (Potassium-binding and translocating subunit C) (Potassium-translocating ATPase C chain)	kdpC bll6777	Bradyrhizobium diazoefficiens (strain JCM 10833 / IAM 13628 / NBRC 14792 / USDA 110)	SUBCELLULAR LOCATION: Cell inner membrane {ECO:0000255|HAMAP-Rule:MF_00276}; Single-pass membrane protein {ECO:0000255|HAMAP-Rule:MF_00276}.
A5EQ10	3.6.3.12		Potassium-transporting ATPase C chain (EC 3.6.3.12) (ATP phosphohydrolase [potassium-transporting] C chain) (Potassium-binding and translocating subunit C) (Potassium-translocating ATPase C chain)	kdpC BBta_6336	Bradyrhizobium sp. (strain BTAi1 / ATCC BAA-1182)	SUBCELLULAR LOCATION: Cell inner membrane {ECO:0000255|HAMAP-Rule:MF_00276}; Single-pass membrane protein {ECO:0000255|HAMAP-Rule:MF_00276}.
A4Z016	3.6.3.12		Potassium-transporting ATPase C chain (EC 3.6.3.12) (ATP phosphohydrolase [potassium-transporting] C chain) (Potassium-binding and translocating subunit C) (Potassium-translocating ATPase C chain)	kdpC BRADO5828	Bradyrhizobium sp. (strain ORS278)	SUBCELLULAR LOCATION: Cell inner membrane {ECO:0000255|HAMAP-Rule:MF_00276}; Single-pass membrane protein {ECO:0000255|HAMAP-Rule:MF_00276}.
B1YTU3	3.6.3.12		Potassium-transporting ATPase C chain (EC 3.6.3.12) (ATP phosphohydrolase [potassium-transporting] C chain) (Potassium-binding and translocating subunit C) (Potassium-translocating ATPase C chain)	kdpC BamMC406_2202	Burkholderia ambifaria (strain MC40-6)	SUBCELLULAR LOCATION: Cell inner membrane {ECO:0000255|HAMAP-Rule:MF_00276}; Single-pass membrane protein {ECO:0000255|HAMAP-Rule:MF_00276}.
Q1BUX7	3.6.3.12		Potassium-transporting ATPase C chain (EC 3.6.3.12) (ATP phosphohydrolase [potassium-transporting] C chain) (Potassium-binding and translocating subunit C) (Potassium-translocating ATPase C chain)	kdpC Bcen_1674	Burkholderia cenocepacia (strain AU 1054)	SUBCELLULAR LOCATION: Cell inner membrane {ECO:0000255|HAMAP-Rule:MF_00276}; Single-pass membrane protein {ECO:0000255|HAMAP-Rule:MF_00276}.
B1JVS7	3.6.3.12		Potassium-transporting ATPase C chain (EC 3.6.3.12) (ATP phosphohydrolase [potassium-transporting] C chain) (Potassium-binding and translocating subunit C) (Potassium-translocating ATPase C chain)	kdpC Bcenmc03_2309	Burkholderia cenocepacia (strain MC0-3)	SUBCELLULAR LOCATION: Cell inner membrane {ECO:0000255|HAMAP-Rule:MF_00276}; Single-pass membrane protein {ECO:0000255|HAMAP-Rule:MF_00276}.
A0K960	3.6.3.12		Potassium-transporting ATPase C chain (EC 3.6.3.12) (ATP phosphohydrolase [potassium-transporting] C chain) (Potassium-binding and translocating subunit C) (Potassium-translocating ATPase C chain)	kdpC Bcen2424_2286	Burkholderia cenocepacia (strain HI2424)	SUBCELLULAR LOCATION: Cell inner membrane {ECO:0000255|HAMAP-Rule:MF_00276}; Single-pass membrane protein {ECO:0000255|HAMAP-Rule:MF_00276}.
B4E5Q9	3.6.3.12		Potassium-transporting ATPase C chain (EC 3.6.3.12) (ATP phosphohydrolase [potassium-transporting] C chain) (Potassium-binding and translocating subunit C) (Potassium-translocating ATPase C chain)	kdpC BceJ2315_23410 BCAL2381	Burkholderia cenocepacia (strain ATCC BAA-245 / DSM 16553 / LMG 16656 / NCTC 13227 / J2315 / CF5610) (Burkholderia cepacia (strain J2315))	SUBCELLULAR LOCATION: Cell inner membrane {ECO:0000255|HAMAP-Rule:MF_00276}; Single-pass membrane protein {ECO:0000255|HAMAP-Rule:MF_00276}.
Q0BD93	3.6.3.12		Potassium-transporting ATPase C chain (EC 3.6.3.12) (ATP phosphohydrolase [potassium-transporting] C chain) (Potassium-binding and translocating subunit C) (Potassium-translocating ATPase C chain)	kdpC Bamb_2324	Burkholderia ambifaria (strain ATCC BAA-244 / AMMD) (Burkholderia cepacia (strain AMMD))	SUBCELLULAR LOCATION: Cell inner membrane {ECO:0000255|HAMAP-Rule:MF_00276}; Single-pass membrane protein {ECO:0000255|HAMAP-Rule:MF_00276}.
A9AJK8	3.6.3.12		Potassium-transporting ATPase C chain (EC 3.6.3.12) (ATP phosphohydrolase [potassium-transporting] C chain) (Potassium-binding and translocating subunit C) (Potassium-translocating ATPase C chain)	kdpC Bmul_0992 BMULJ_02272	Burkholderia multivorans (strain ATCC 17616 / 249)	SUBCELLULAR LOCATION: Cell inner membrane {ECO:0000255|HAMAP-Rule:MF_00276}; Single-pass membrane protein {ECO:0000255|HAMAP-Rule:MF_00276}.
A3MI57	3.6.3.12		Potassium-transporting ATPase C chain (EC 3.6.3.12) (ATP phosphohydrolase [potassium-transporting] C chain) (Potassium-binding and translocating subunit C) (Potassium-translocating ATPase C chain)	kdpC BMA10247_0368	Burkholderia mallei (strain NCTC 10247)	SUBCELLULAR LOCATION: Cell inner membrane {ECO:0000255|HAMAP-Rule:MF_00276}; Single-pass membrane protein {ECO:0000255|HAMAP-Rule:MF_00276}.			A3MI57;
A2S4A3	3.6.3.12		Potassium-transporting ATPase C chain (EC 3.6.3.12) (ATP phosphohydrolase [potassium-transporting] C chain) (Potassium-binding and translocating subunit C) (Potassium-translocating ATPase C chain)	kdpC BMA10229_A0782	Burkholderia mallei (strain NCTC 10229)	SUBCELLULAR LOCATION: Cell inner membrane {ECO:0000255|HAMAP-Rule:MF_00276}; Single-pass membrane protein {ECO:0000255|HAMAP-Rule:MF_00276}.			A2S4A3;
Q62IJ8	3.6.3.12		Potassium-transporting ATPase C chain (EC 3.6.3.12) (ATP phosphohydrolase [potassium-transporting] C chain) (Potassium-binding and translocating subunit C) (Potassium-translocating ATPase C chain)	kdpC BMA1874	Burkholderia mallei (strain ATCC 23344)	SUBCELLULAR LOCATION: Cell inner membrane {ECO:0000255|HAMAP-Rule:MF_00276}; Single-pass membrane protein {ECO:0000255|HAMAP-Rule:MF_00276}.			Q62IJ8;
A3NT59	3.6.3.12		Potassium-transporting ATPase C chain (EC 3.6.3.12) (ATP phosphohydrolase [potassium-transporting] C chain) (Potassium-binding and translocating subunit C) (Potassium-translocating ATPase C chain)	kdpC BURPS1106A_1251	Burkholderia pseudomallei (strain 1106a)	SUBCELLULAR LOCATION: Cell inner membrane {ECO:0000255|HAMAP-Rule:MF_00276}; Single-pass membrane protein {ECO:0000255|HAMAP-Rule:MF_00276}.			A3NT59;
A1V2H2	3.6.3.12		Potassium-transporting ATPase C chain (EC 3.6.3.12) (ATP phosphohydrolase [potassium-transporting] C chain) (Potassium-binding and translocating subunit C) (Potassium-translocating ATPase C chain)	kdpC BMASAVP1_A1085	Burkholderia mallei (strain SAVP1)	SUBCELLULAR LOCATION: Cell inner membrane {ECO:0000255|HAMAP-Rule:MF_00276}; Single-pass membrane protein {ECO:0000255|HAMAP-Rule:MF_00276}.			A1V2H2;
Q3JUE8	3.6.3.12		Potassium-transporting ATPase C chain (EC 3.6.3.12) (ATP phosphohydrolase [potassium-transporting] C chain) (Potassium-binding and translocating subunit C) (Potassium-translocating ATPase C chain)	kdpC BURPS1710b_1395	Burkholderia pseudomallei (strain 1710b)	SUBCELLULAR LOCATION: Cell inner membrane {ECO:0000255|HAMAP-Rule:MF_00276}; Single-pass membrane protein {ECO:0000255|HAMAP-Rule:MF_00276}.			Q3JUE8;
A3N7H1	3.6.3.12		Potassium-transporting ATPase C chain (EC 3.6.3.12) (ATP phosphohydrolase [potassium-transporting] C chain) (Potassium-binding and translocating subunit C) (Potassium-translocating ATPase C chain)	kdpC BURPS668_1243	Burkholderia pseudomallei (strain 668)	SUBCELLULAR LOCATION: Cell inner membrane {ECO:0000255|HAMAP-Rule:MF_00276}; Single-pass membrane protein {ECO:0000255|HAMAP-Rule:MF_00276}.			A3N7H1;
B2JE25	3.6.3.12		Potassium-transporting ATPase C chain (EC 3.6.3.12) (ATP phosphohydrolase [potassium-transporting] C chain) (Potassium-binding and translocating subunit C) (Potassium-translocating ATPase C chain)	kdpC Bphy_2055	Burkholderia phymatum (strain DSM 17167 / STM815)	SUBCELLULAR LOCATION: Cell inner membrane {ECO:0000255|HAMAP-Rule:MF_00276}; Single-pass membrane protein {ECO:0000255|HAMAP-Rule:MF_00276}.
B2T2B4	3.6.3.12		Potassium-transporting ATPase C chain (EC 3.6.3.12) (ATP phosphohydrolase [potassium-transporting] C chain) (Potassium-binding and translocating subunit C) (Potassium-translocating ATPase C chain)	kdpC Bphyt_1310	Burkholderia phytofirmans (strain DSM 17436 / PsJN)	SUBCELLULAR LOCATION: Cell inner membrane {ECO:0000255|HAMAP-Rule:MF_00276}; Single-pass membrane protein {ECO:0000255|HAMAP-Rule:MF_00276}.
Q63VS1	3.6.3.12		Potassium-transporting ATPase C chain (EC 3.6.3.12) (ATP phosphohydrolase [potassium-transporting] C chain) (Potassium-binding and translocating subunit C) (Potassium-translocating ATPase C chain)	kdpC BPSL1173	Burkholderia pseudomallei (strain K96243)	SUBCELLULAR LOCATION: Cell inner membrane {ECO:0000255|HAMAP-Rule:MF_00276}; Single-pass membrane protein {ECO:0000255|HAMAP-Rule:MF_00276}.			Q63VS1;
Q2SZS2	3.6.3.12		Potassium-transporting ATPase C chain (EC 3.6.3.12) (ATP phosphohydrolase [potassium-transporting] C chain) (Potassium-binding and translocating subunit C) (Potassium-translocating ATPase C chain)	kdpC BTH_I1023	Burkholderia thailandensis (strain E264 / ATCC 700388 / DSM 13276 / CIP 106301)	SUBCELLULAR LOCATION: Cell inner membrane {ECO:0000255|HAMAP-Rule:MF_00276}; Single-pass membrane protein {ECO:0000255|HAMAP-Rule:MF_00276}.
A4JGG7	3.6.3.12		Potassium-transporting ATPase C chain (EC 3.6.3.12) (ATP phosphohydrolase [potassium-transporting] C chain) (Potassium-binding and translocating subunit C) (Potassium-translocating ATPase C chain)	kdpC Bcep1808_2371	Burkholderia vietnamiensis (strain G4 / LMG 22486) (Burkholderia cepacia (strain R1808))	SUBCELLULAR LOCATION: Cell inner membrane {ECO:0000255|HAMAP-Rule:MF_00276}; Single-pass membrane protein {ECO:0000255|HAMAP-Rule:MF_00276}.
Q142K7	3.6.3.12		Potassium-transporting ATPase C chain (EC 3.6.3.12) (ATP phosphohydrolase [potassium-transporting] C chain) (Potassium-binding and translocating subunit C) (Potassium-translocating ATPase C chain)	kdpC Bxeno_A1194 Bxe_A3250	Burkholderia xenovorans (strain LB400)	SUBCELLULAR LOCATION: Cell inner membrane {ECO:0000255|HAMAP-Rule:MF_00276}; Single-pass membrane protein {ECO:0000255|HAMAP-Rule:MF_00276}.
Q8R8I7	3.6.3.12		Potassium-transporting ATPase C chain (EC 3.6.3.12) (ATP phosphohydrolase [potassium-transporting] C chain) (Potassium-binding and translocating subunit C) (Potassium-translocating ATPase C chain)	kdpC TTE2010	Caldanaerobacter subterraneus subsp. tengcongensis (strain DSM 15242 / JCM 11007 / NBRC 100824 / MB4) (Thermoanaerobacter tengcongensis)	SUBCELLULAR LOCATION: Cell membrane {ECO:0000255|HAMAP-Rule:MF_00276}; Single-pass membrane protein {ECO:0000255|HAMAP-Rule:MF_00276}.
B8GVG0	3.6.3.12		Potassium-transporting ATPase C chain (EC 3.6.3.12) (ATP phosphohydrolase [potassium-transporting] C chain) (Potassium-binding and translocating subunit C) (Potassium-translocating ATPase C chain)	kdpC CCNA_01665	Caulobacter crescentus (strain NA1000 / CB15N)	SUBCELLULAR LOCATION: Cell inner membrane {ECO:0000255|HAMAP-Rule:MF_00276}; Single-pass membrane protein {ECO:0000255|HAMAP-Rule:MF_00276}.
Q9A7X6	3.6.3.12		Potassium-transporting ATPase C chain (EC 3.6.3.12) (ATP phosphohydrolase [potassium-transporting] C chain) (Potassium-binding and translocating subunit C) (Potassium-translocating ATPase C chain)	kdpC CC_1593	Caulobacter crescentus (strain ATCC 19089 / CB15)	SUBCELLULAR LOCATION: Cell inner membrane {ECO:0000255|HAMAP-Rule:MF_00276}; Single-pass membrane protein {ECO:0000255|HAMAP-Rule:MF_00276}.
B0SYJ5	3.6.3.12		Potassium-transporting ATPase C chain (EC 3.6.3.12) (ATP phosphohydrolase [potassium-transporting] C chain) (Potassium-binding and translocating subunit C) (Potassium-translocating ATPase C chain)	kdpC Caul_4240	Caulobacter sp. (strain K31)	SUBCELLULAR LOCATION: Cell inner membrane {ECO:0000255|HAMAP-Rule:MF_00276}; Single-pass membrane protein {ECO:0000255|HAMAP-Rule:MF_00276}.
P94606	3.6.3.12		Potassium-transporting ATPase C chain (EC 3.6.3.12) (ATP phosphohydrolase [potassium-transporting] C chain) (Potassium-binding and translocating subunit C) (Potassium-translocating ATPase C chain)	kdpC CA_C3680	Clostridium acetobutylicum (strain ATCC 824 / DSM 792 / JCM 1419 / LMG 5710 / VKM B-1787)	SUBCELLULAR LOCATION: Cell membrane {ECO:0000305}; Single-pass membrane protein {ECO:0000305}.
B2V2P4	3.6.3.12		Potassium-transporting ATPase C chain (EC 3.6.3.12) (ATP phosphohydrolase [potassium-transporting] C chain) (Potassium-binding and translocating subunit C) (Potassium-translocating ATPase C chain)	kdpC CLH_0917	Clostridium botulinum (strain Alaska E43 / Type E3)	SUBCELLULAR LOCATION: Cell membrane {ECO:0000255|HAMAP-Rule:MF_00276}; Single-pass membrane protein {ECO:0000255|HAMAP-Rule:MF_00276}.
B2TMJ3	3.6.3.12		Potassium-transporting ATPase C chain (EC 3.6.3.12) (ATP phosphohydrolase [potassium-transporting] C chain) (Potassium-binding and translocating subunit C) (Potassium-translocating ATPase C chain)	kdpC CLL_A0980	Clostridium botulinum (strain Eklund 17B / Type B)	SUBCELLULAR LOCATION: Cell membrane {ECO:0000255|HAMAP-Rule:MF_00276}; Single-pass membrane protein {ECO:0000255|HAMAP-Rule:MF_00276}.
A5N884	3.6.3.12		Potassium-transporting ATPase C chain (EC 3.6.3.12) (ATP phosphohydrolase [potassium-transporting] C chain) (Potassium-binding and translocating subunit C) (Potassium-translocating ATPase C chain)	kdpC CKL_1473	Clostridium kluyveri (strain ATCC 8527 / DSM 555 / NCIMB 10680)	SUBCELLULAR LOCATION: Cell membrane {ECO:0000255|HAMAP-Rule:MF_00276}; Single-pass membrane protein {ECO:0000255|HAMAP-Rule:MF_00276}.
Q0TRT2	3.6.3.12		Potassium-transporting ATPase C chain (EC 3.6.3.12) (ATP phosphohydrolase [potassium-transporting] C chain) (Potassium-binding and translocating subunit C) (Potassium-translocating ATPase C chain)	kdpC CPF_1212	Clostridium perfringens (strain ATCC 13124 / NCTC 8237 / Type A)	SUBCELLULAR LOCATION: Cell membrane {ECO:0000255|HAMAP-Rule:MF_00276}; Single-pass membrane protein {ECO:0000255|HAMAP-Rule:MF_00276}.
A7MQV0	3.6.3.12		Potassium-transporting ATPase C chain (EC 3.6.3.12) (ATP phosphohydrolase [potassium-transporting] C chain) (Potassium-binding and translocating subunit C) (Potassium-translocating ATPase C chain)	kdpC ESA_02643	Cronobacter sakazakii (strain ATCC BAA-894) (Enterobacter sakazakii)	SUBCELLULAR LOCATION: Cell inner membrane {ECO:0000255|HAMAP-Rule:MF_00276}; Single-pass membrane protein {ECO:0000255|HAMAP-Rule:MF_00276}.
Q47H40	3.6.3.12		Potassium-transporting ATPase C chain (EC 3.6.3.12) (ATP phosphohydrolase [potassium-transporting] C chain) (Potassium-binding and translocating subunit C) (Potassium-translocating ATPase C chain)	kdpC Daro_1085	Dechloromonas aromatica (strain RCB)	SUBCELLULAR LOCATION: Cell inner membrane {ECO:0000255|HAMAP-Rule:MF_00276}; Single-pass membrane protein {ECO:0000255|HAMAP-Rule:MF_00276}.
Q9RZN6	3.6.3.12		Potassium-transporting ATPase C chain (EC 3.6.3.12) (ATP phosphohydrolase [potassium-transporting] C chain) (Potassium-binding and translocating subunit C) (Potassium-translocating ATPase C chain)	kdpC DR_B0087	Deinococcus radiodurans (strain ATCC 13939 / DSM 20539 / JCM 16871 / LMG 4051 / NBRC 15346 / NCIMB 9279 / R1 / VKM B-1422)	SUBCELLULAR LOCATION: Cell membrane {ECO:0000250}; Single-pass membrane protein {ECO:0000250}.
B8DR36	3.6.3.12		Potassium-transporting ATPase C chain (EC 3.6.3.12) (ATP phosphohydrolase [potassium-transporting] C chain) (Potassium-binding and translocating subunit C) (Potassium-translocating ATPase C chain)	kdpC DvMF_2575	Desulfovibrio vulgaris (strain Miyazaki F / DSM 19637)	SUBCELLULAR LOCATION: Cell inner membrane {ECO:0000255|HAMAP-Rule:MF_00276}; Single-pass membrane protein {ECO:0000255|HAMAP-Rule:MF_00276}.
A7ZJ79	3.6.3.12		Potassium-transporting ATPase C chain (EC 3.6.3.12) (ATP phosphohydrolase [potassium-transporting] C chain) (Potassium-binding and translocating subunit C) (Potassium-translocating ATPase C chain)	kdpC EcE24377A_0722	Escherichia coli O139:H28 (strain E24377A / ETEC)	SUBCELLULAR LOCATION: Cell inner membrane {ECO:0000255|HAMAP-Rule:MF_00276}; Single-pass membrane protein {ECO:0000255|HAMAP-Rule:MF_00276}.
B7UKX5	3.6.3.12		Potassium-transporting ATPase C chain (EC 3.6.3.12) (ATP phosphohydrolase [potassium-transporting] C chain) (Potassium-binding and translocating subunit C) (Potassium-translocating ATPase C chain)	kdpC E2348C_0585	Escherichia coli O127:H6 (strain E2348/69 / EPEC)	SUBCELLULAR LOCATION: Cell inner membrane {ECO:0000255|HAMAP-Rule:MF_00276}; Single-pass membrane protein {ECO:0000255|HAMAP-Rule:MF_00276}.
B7MFW1	3.6.3.12		Potassium-transporting ATPase C chain (EC 3.6.3.12) (ATP phosphohydrolase [potassium-transporting] C chain) (Potassium-binding and translocating subunit C) (Potassium-translocating ATPase C chain)	kdpC ECS88_0730	Escherichia coli O45:K1 (strain S88 / ExPEC)	SUBCELLULAR LOCATION: Cell inner membrane {ECO:0000255|HAMAP-Rule:MF_00276}; Single-pass membrane protein {ECO:0000255|HAMAP-Rule:MF_00276}.
B7LAA3	3.6.3.12		Potassium-transporting ATPase C chain (EC 3.6.3.12) (ATP phosphohydrolase [potassium-transporting] C chain) (Potassium-binding and translocating subunit C) (Potassium-translocating ATPase C chain)	kdpC EC55989_0680	Escherichia coli (strain 55989 / EAEC)	SUBCELLULAR LOCATION: Cell inner membrane {ECO:0000255|HAMAP-Rule:MF_00276}; Single-pass membrane protein {ECO:0000255|HAMAP-Rule:MF_00276}.
Q8X9G0	3.6.3.12		Potassium-transporting ATPase C chain (EC 3.6.3.12) (ATP phosphohydrolase [potassium-transporting] C chain) (Potassium-binding and translocating subunit C) (Potassium-translocating ATPase C chain)	kdpC Z0843 ECs0724	Escherichia coli O157:H7	SUBCELLULAR LOCATION: Cell inner membrane {ECO:0000255|HAMAP-Rule:MF_00276}; Single-pass membrane protein {ECO:0000255|HAMAP-Rule:MF_00276}.
B5YQN8	3.6.3.12		Potassium-transporting ATPase C chain (EC 3.6.3.12) (ATP phosphohydrolase [potassium-transporting] C chain) (Potassium-binding and translocating subunit C) (Potassium-translocating ATPase C chain)	kdpC ECH74115_0789	Escherichia coli O157:H7 (strain EC4115 / EHEC)	SUBCELLULAR LOCATION: Cell inner membrane {ECO:0000255|HAMAP-Rule:MF_00276}; Single-pass membrane protein {ECO:0000255|HAMAP-Rule:MF_00276}.
B7NMP9	3.6.3.12		Potassium-transporting ATPase C chain (EC 3.6.3.12) (ATP phosphohydrolase [potassium-transporting] C chain) (Potassium-binding and translocating subunit C) (Potassium-translocating ATPase C chain)	kdpC ECIAI39_0655	Escherichia coli O7:K1 (strain IAI39 / ExPEC)	SUBCELLULAR LOCATION: Cell inner membrane {ECO:0000255|HAMAP-Rule:MF_00276}; Single-pass membrane protein {ECO:0000255|HAMAP-Rule:MF_00276}.
B7MPJ9	3.6.3.12		Potassium-transporting ATPase C chain (EC 3.6.3.12) (ATP phosphohydrolase [potassium-transporting] C chain) (Potassium-binding and translocating subunit C) (Potassium-translocating ATPase C chain)	kdpC ECED1_0675	Escherichia coli O81 (strain ED1a)	SUBCELLULAR LOCATION: Cell inner membrane {ECO:0000255|HAMAP-Rule:MF_00276}; Single-pass membrane protein {ECO:0000255|HAMAP-Rule:MF_00276}.
B7M5L2	3.6.3.12		Potassium-transporting ATPase C chain (EC 3.6.3.12) (ATP phosphohydrolase [potassium-transporting] C chain) (Potassium-binding and translocating subunit C) (Potassium-translocating ATPase C chain)	kdpC ECIAI1_0672	Escherichia coli O8 (strain IAI1)	SUBCELLULAR LOCATION: Cell inner membrane {ECO:0000255|HAMAP-Rule:MF_00276}; Single-pass membrane protein {ECO:0000255|HAMAP-Rule:MF_00276}.
C4ZWH2	3.6.3.12		Potassium-transporting ATPase C chain (EC 3.6.3.12) (ATP phosphohydrolase [potassium-transporting] C chain) (Potassium-binding and translocating subunit C) (Potassium-translocating ATPase C chain)	kdpC BWG_0556	Escherichia coli (strain K12 / MC4100 / BW2952)	SUBCELLULAR LOCATION: Cell inner membrane {ECO:0000255|HAMAP-Rule:MF_00276}; Single-pass membrane protein {ECO:0000255|HAMAP-Rule:MF_00276}.			C4ZWH2;
B1X6M7	3.6.3.12		Potassium-transporting ATPase C chain (EC 3.6.3.12) (ATP phosphohydrolase [potassium-transporting] C chain) (Potassium-binding and translocating subunit C) (Potassium-translocating ATPase C chain)	kdpC ECDH10B_0762	Escherichia coli (strain K12 / DH10B)	SUBCELLULAR LOCATION: Cell inner membrane {ECO:0000255|HAMAP-Rule:MF_00276}; Single-pass membrane protein {ECO:0000255|HAMAP-Rule:MF_00276}.			B1X6M7;
A7ZXV7	3.6.3.12		Potassium-transporting ATPase C chain (EC 3.6.3.12) (ATP phosphohydrolase [potassium-transporting] C chain) (Potassium-binding and translocating subunit C) (Potassium-translocating ATPase C chain)	kdpC EcHS_A0743	Escherichia coli O9:H4 (strain HS)	SUBCELLULAR LOCATION: Cell inner membrane {ECO:0000255|HAMAP-Rule:MF_00276}; Single-pass membrane protein {ECO:0000255|HAMAP-Rule:MF_00276}.
Q0TJZ0	3.6.3.12		Potassium-transporting ATPase C chain (EC 3.6.3.12) (ATP phosphohydrolase [potassium-transporting] C chain) (Potassium-binding and translocating subunit C) (Potassium-translocating ATPase C chain)	kdpC ECP_0715	Escherichia coli O6:K15:H31 (strain 536 / UPEC)	SUBCELLULAR LOCATION: Cell inner membrane {ECO:0000255|HAMAP-Rule:MF_00276}; Single-pass membrane protein {ECO:0000255|HAMAP-Rule:MF_00276}.
Q8FJV5	3.6.3.12		Potassium-transporting ATPase C chain (EC 3.6.3.12) (ATP phosphohydrolase [potassium-transporting] C chain) (Potassium-binding and translocating subunit C) (Potassium-translocating ATPase C chain)	kdpC c0781	Escherichia coli O6:H1 (strain CFT073 / ATCC 700928 / UPEC)	SUBCELLULAR LOCATION: Cell inner membrane {ECO:0000255|HAMAP-Rule:MF_00276}; Single-pass membrane protein {ECO:0000255|HAMAP-Rule:MF_00276}.
B1IY33	3.6.3.12		Potassium-transporting ATPase C chain (EC 3.6.3.12) (ATP phosphohydrolase [potassium-transporting] C chain) (Potassium-binding and translocating subunit C) (Potassium-translocating ATPase C chain)	kdpC EcolC_2960	Escherichia coli (strain ATCC 8739 / DSM 1576 / Crooks)	SUBCELLULAR LOCATION: Cell inner membrane {ECO:0000255|HAMAP-Rule:MF_00276}; Single-pass membrane protein {ECO:0000255|HAMAP-Rule:MF_00276}.			B1IY33;
P03961	3.6.3.12		Potassium-transporting ATPase C chain (EC 3.6.3.12) (ATP phosphohydrolase [potassium-transporting] C chain) (Potassium-binding and translocating subunit C) (Potassium-translocating ATPase C chain)	kdpC b0696 JW0684	Escherichia coli (strain K12)	SUBCELLULAR LOCATION: Cell inner membrane {ECO:0000250}; Single-pass membrane protein {ECO:0000250}.			P03961;
B7N9T9	3.6.3.12		Potassium-transporting ATPase C chain (EC 3.6.3.12) (ATP phosphohydrolase [potassium-transporting] C chain) (Potassium-binding and translocating subunit C) (Potassium-translocating ATPase C chain)	kdpC ECUMN_0778	Escherichia coli O17:K52:H18 (strain UMN026 / ExPEC)	SUBCELLULAR LOCATION: Cell inner membrane {ECO:0000255|HAMAP-Rule:MF_00276}; Single-pass membrane protein {ECO:0000255|HAMAP-Rule:MF_00276}.
B6HYQ4	3.6.3.12		Potassium-transporting ATPase C chain (EC 3.6.3.12) (ATP phosphohydrolase [potassium-transporting] C chain) (Potassium-binding and translocating subunit C) (Potassium-translocating ATPase C chain)	kdpC ECSE_0756	Escherichia coli (strain SE11)	SUBCELLULAR LOCATION: Cell inner membrane {ECO:0000255|HAMAP-Rule:MF_00276}; Single-pass membrane protein {ECO:0000255|HAMAP-Rule:MF_00276}.			B6HYQ4;
B1LLE0	3.6.3.12		Potassium-transporting ATPase C chain (EC 3.6.3.12) (ATP phosphohydrolase [potassium-transporting] C chain) (Potassium-binding and translocating subunit C) (Potassium-translocating ATPase C chain)	kdpC EcSMS35_0718	Escherichia coli (strain SMS-3-5 / SECEC)	SUBCELLULAR LOCATION: Cell inner membrane {ECO:0000255|HAMAP-Rule:MF_00276}; Single-pass membrane protein {ECO:0000255|HAMAP-Rule:MF_00276}.
A4W859	3.6.3.12		Potassium-transporting ATPase C chain (EC 3.6.3.12) (ATP phosphohydrolase [potassium-transporting] C chain) (Potassium-binding and translocating subunit C) (Potassium-translocating ATPase C chain)	kdpC Ent638_1208	Enterobacter sp. (strain 638)	SUBCELLULAR LOCATION: Cell inner membrane {ECO:0000255|HAMAP-Rule:MF_00276}; Single-pass membrane protein {ECO:0000255|HAMAP-Rule:MF_00276}.
B2VJK2	3.6.3.12		Potassium-transporting ATPase C chain (EC 3.6.3.12) (ATP phosphohydrolase [potassium-transporting] C chain) (Potassium-binding and translocating subunit C) (Potassium-translocating ATPase C chain)	kdpC ETA_33630	Erwinia tasmaniensis (strain DSM 17950 / Et1/99)	SUBCELLULAR LOCATION: Cell inner membrane {ECO:0000255|HAMAP-Rule:MF_00276}; Single-pass membrane protein {ECO:0000255|HAMAP-Rule:MF_00276}.
B7LKR8	3.6.3.12		Potassium-transporting ATPase C chain (EC 3.6.3.12) (ATP phosphohydrolase [potassium-transporting] C chain) (Potassium-binding and translocating subunit C) (Potassium-translocating ATPase C chain)	kdpC EFER_2414	Escherichia fergusonii (strain ATCC 35469 / DSM 13698 / CDC 0568-73)	SUBCELLULAR LOCATION: Cell inner membrane {ECO:0000255|HAMAP-Rule:MF_00276}; Single-pass membrane protein {ECO:0000255|HAMAP-Rule:MF_00276}.
A5FIF7	3.6.3.12		Potassium-transporting ATPase C chain (EC 3.6.3.12) (ATP phosphohydrolase [potassium-transporting] C chain) (Potassium-binding and translocating subunit C) (Potassium-translocating ATPase C chain)	kdpC Fjoh_1973	Flavobacterium johnsoniae (strain ATCC 17061 / DSM 2064 / UW101) (Cytophaga johnsonae)	SUBCELLULAR LOCATION: Cell inner membrane {ECO:0000255|HAMAP-Rule:MF_00276}; Single-pass membrane protein {ECO:0000255|HAMAP-Rule:MF_00276}.
A6H084	3.6.3.12		Potassium-transporting ATPase C chain (EC 3.6.3.12) (ATP phosphohydrolase [potassium-transporting] C chain) (Potassium-binding and translocating subunit C) (Potassium-translocating ATPase C chain)	kdpC FP1690	Flavobacterium psychrophilum (strain JIP02/86 / ATCC 49511)	SUBCELLULAR LOCATION: Cell inner membrane {ECO:0000255|HAMAP-Rule:MF_00276}; Single-pass membrane protein {ECO:0000255|HAMAP-Rule:MF_00276}.
C1ABQ7	3.6.3.12		Potassium-transporting ATPase C chain (EC 3.6.3.12) (ATP phosphohydrolase [potassium-transporting] C chain) (Potassium-binding and translocating subunit C) (Potassium-translocating ATPase C chain)	kdpC GAU_2892	Gemmatimonas aurantiaca (strain T-27 / DSM 14586 / JCM 11422 / NBRC 100505)	SUBCELLULAR LOCATION: Cell inner membrane {ECO:0000255|HAMAP-Rule:MF_00276}; Single-pass membrane protein {ECO:0000255|HAMAP-Rule:MF_00276}.
B5EH78	3.6.3.12		Potassium-transporting ATPase C chain (EC 3.6.3.12) (ATP phosphohydrolase [potassium-transporting] C chain) (Potassium-binding and translocating subunit C) (Potassium-translocating ATPase C chain)	kdpC Gbem_2606	Geobacter bemidjiensis (strain Bem / ATCC BAA-1014 / DSM 16622)	SUBCELLULAR LOCATION: Cell inner membrane {ECO:0000255|HAMAP-Rule:MF_00276}; Single-pass membrane protein {ECO:0000255|HAMAP-Rule:MF_00276}.
B3EAQ1	3.6.3.12		Potassium-transporting ATPase C chain (EC 3.6.3.12) (ATP phosphohydrolase [potassium-transporting] C chain) (Potassium-binding and translocating subunit C) (Potassium-translocating ATPase C chain)	kdpC Glov_3228	Geobacter lovleyi (strain ATCC BAA-1151 / DSM 17278 / SZ)	SUBCELLULAR LOCATION: Cell inner membrane {ECO:0000255|HAMAP-Rule:MF_00276}; Single-pass membrane protein {ECO:0000255|HAMAP-Rule:MF_00276}.
Q39SW4	3.6.3.12		Potassium-transporting ATPase C chain (EC 3.6.3.12) (ATP phosphohydrolase [potassium-transporting] C chain) (Potassium-binding and translocating subunit C) (Potassium-translocating ATPase C chain)	kdpC Gmet_2435	Geobacter metallireducens (strain GS-15 / ATCC 53774 / DSM 7210)	SUBCELLULAR LOCATION: Cell inner membrane {ECO:0000255|HAMAP-Rule:MF_00276}; Single-pass membrane protein {ECO:0000255|HAMAP-Rule:MF_00276}.
Q74AA8	3.6.3.12		Potassium-transporting ATPase C chain (EC 3.6.3.12) (ATP phosphohydrolase [potassium-transporting] C chain) (Potassium-binding and translocating subunit C) (Potassium-translocating ATPase C chain)	kdpC GSU2482	Geobacter sulfurreducens (strain ATCC 51573 / DSM 12127 / PCA)	SUBCELLULAR LOCATION: Cell inner membrane {ECO:0000255|HAMAP-Rule:MF_00276}; Single-pass membrane protein {ECO:0000255|HAMAP-Rule:MF_00276}.
A5GAG0	3.6.3.12		Potassium-transporting ATPase C chain (EC 3.6.3.12) (ATP phosphohydrolase [potassium-transporting] C chain) (Potassium-binding and translocating subunit C) (Potassium-translocating ATPase C chain)	kdpC Gura_1225	Geobacter uraniireducens (strain Rf4) (Geobacter uraniumreducens)	SUBCELLULAR LOCATION: Cell inner membrane {ECO:0000255|HAMAP-Rule:MF_00276}; Single-pass membrane protein {ECO:0000255|HAMAP-Rule:MF_00276}.
Q7NN39	3.6.3.12		Potassium-transporting ATPase C chain (EC 3.6.3.12) (ATP phosphohydrolase [potassium-transporting] C chain) (Potassium-binding and translocating subunit C) (Potassium-translocating ATPase C chain)	kdpC glr0575	Gloeobacter violaceus (strain PCC 7421)	SUBCELLULAR LOCATION: Cell inner membrane {ECO:0000255|HAMAP-Rule:MF_00276}; Single-pass membrane protein {ECO:0000255|HAMAP-Rule:MF_00276}.
P57687	3.6.3.12		Potassium-transporting ATPase C chain (EC 3.6.3.12) (ATP phosphohydrolase [potassium-transporting] C chain) (Potassium-binding and translocating subunit C) (Potassium-translocating ATPase C chain)	kdpC VNG_6178G	Halobacterium salinarum (strain ATCC 700922 / JCM 11081 / NRC-1) (Halobacterium halobium)	SUBCELLULAR LOCATION: Cell membrane {ECO:0000250}; Single-pass membrane protein {ECO:0000250}.
A9AXV2	3.6.3.12		Potassium-transporting ATPase C chain (EC 3.6.3.12) (ATP phosphohydrolase [potassium-transporting] C chain) (Potassium-binding and translocating subunit C) (Potassium-translocating ATPase C chain)	kdpC Haur_2278	Herpetosiphon aurantiacus (strain ATCC 23779 / DSM 785)	SUBCELLULAR LOCATION: Cell membrane {ECO:0000255|HAMAP-Rule:MF_00276}; Single-pass membrane protein {ECO:0000255|HAMAP-Rule:MF_00276}.
A4G5J7	3.6.3.12		Potassium-transporting ATPase C chain (EC 3.6.3.12) (ATP phosphohydrolase [potassium-transporting] C chain) (Potassium-binding and translocating subunit C) (Potassium-translocating ATPase C chain)	kdpC HEAR1624	Herminiimonas arsenicoxydans	SUBCELLULAR LOCATION: Cell inner membrane {ECO:0000255|HAMAP-Rule:MF_00276}; Single-pass membrane protein {ECO:0000255|HAMAP-Rule:MF_00276}.
A6SZ14	3.6.3.12		Potassium-transporting ATPase C chain (EC 3.6.3.12) (ATP phosphohydrolase [potassium-transporting] C chain) (Potassium-binding and translocating subunit C) (Potassium-translocating ATPase C chain)	kdpC mma_1821	Janthinobacterium sp. (strain Marseille) (Minibacterium massiliensis)	SUBCELLULAR LOCATION: Cell inner membrane {ECO:0000255|HAMAP-Rule:MF_00276}; Single-pass membrane protein {ECO:0000255|HAMAP-Rule:MF_00276}.
A6W6R7	3.6.3.12		Potassium-transporting ATPase C chain (EC 3.6.3.12) (ATP phosphohydrolase [potassium-transporting] C chain) (Potassium-binding and translocating subunit C) (Potassium-translocating ATPase C chain)	kdpC Krad_1018	Kineococcus radiotolerans (strain ATCC BAA-149 / DSM 14245 / SRS30216)	SUBCELLULAR LOCATION: Cell membrane {ECO:0000255|HAMAP-Rule:MF_00276}; Single-pass membrane protein {ECO:0000255|HAMAP-Rule:MF_00276}.
B5XZF0	3.6.3.12		Potassium-transporting ATPase C chain (EC 3.6.3.12) (ATP phosphohydrolase [potassium-transporting] C chain) (Potassium-binding and translocating subunit C) (Potassium-translocating ATPase C chain)	kdpC KPK_3855	Klebsiella pneumoniae (strain 342)	SUBCELLULAR LOCATION: Cell inner membrane {ECO:0000255|HAMAP-Rule:MF_00276}; Single-pass membrane protein {ECO:0000255|HAMAP-Rule:MF_00276}.
A6T6D7	3.6.3.12		Potassium-transporting ATPase C chain (EC 3.6.3.12) (ATP phosphohydrolase [potassium-transporting] C chain) (Potassium-binding and translocating subunit C) (Potassium-translocating ATPase C chain)	kdpC KPN78578_06970 KPN_00715	Klebsiella pneumoniae subsp. pneumoniae (strain ATCC 700721 / MGH 78578)	SUBCELLULAR LOCATION: Cell inner membrane {ECO:0000255|HAMAP-Rule:MF_00276}; Single-pass membrane protein {ECO:0000255|HAMAP-Rule:MF_00276}.
Q1IUD3	3.6.3.12		Potassium-transporting ATPase C chain (EC 3.6.3.12) (ATP phosphohydrolase [potassium-transporting] C chain) (Potassium-binding and translocating subunit C) (Potassium-translocating ATPase C chain)	kdpC Acid345_0512	Koribacter versatilis (strain Ellin345)	SUBCELLULAR LOCATION: Cell inner membrane {ECO:0000255|HAMAP-Rule:MF_00276}; Single-pass membrane protein {ECO:0000255|HAMAP-Rule:MF_00276}.
Q72TM5	3.6.3.12		Potassium-transporting ATPase C chain (EC 3.6.3.12) (ATP phosphohydrolase [potassium-transporting] C chain) (Potassium-binding and translocating subunit C) (Potassium-translocating ATPase C chain)	kdpC LIC_10992	Leptospira interrogans serogroup Icterohaemorrhagiae serovar copenhageni (strain Fiocruz L1-130)	SUBCELLULAR LOCATION: Cell inner membrane {ECO:0000255|HAMAP-Rule:MF_00276}; Single-pass membrane protein {ECO:0000255|HAMAP-Rule:MF_00276}.
Q8F1M2	3.6.3.12		Potassium-transporting ATPase C chain (EC 3.6.3.12) (ATP phosphohydrolase [potassium-transporting] C chain) (Potassium-binding and translocating subunit C) (Potassium-translocating ATPase C chain)	kdpC LA_3110	Leptospira interrogans serogroup Icterohaemorrhagiae serovar Lai (strain 56601)	SUBCELLULAR LOCATION: Cell inner membrane {ECO:0000255|HAMAP-Rule:MF_00276}; Single-pass membrane protein {ECO:0000255|HAMAP-Rule:MF_00276}.
Q927G1	3.6.3.12		Potassium-transporting ATPase C chain (EC 3.6.3.12) (ATP phosphohydrolase [potassium-transporting] C chain) (Potassium-binding and translocating subunit C) (Potassium-translocating ATPase C chain)	kdpC lin2828	Listeria innocua serovar 6a (strain CLIP 11262)	SUBCELLULAR LOCATION: Cell membrane {ECO:0000255|HAMAP-Rule:MF_00276}; Single-pass membrane protein {ECO:0000255|HAMAP-Rule:MF_00276}.
C1KZN4	3.6.3.12		Potassium-transporting ATPase C chain (EC 3.6.3.12) (ATP phosphohydrolase [potassium-transporting] C chain) (Potassium-binding and translocating subunit C) (Potassium-translocating ATPase C chain)	kdpC Lm4b_02653	Listeria monocytogenes serotype 4b (strain CLIP80459)	SUBCELLULAR LOCATION: Cell membrane {ECO:0000255|HAMAP-Rule:MF_00276}; Single-pass membrane protein {ECO:0000255|HAMAP-Rule:MF_00276}.
Q71W91	3.6.3.12		Potassium-transporting ATPase C chain (EC 3.6.3.12) (ATP phosphohydrolase [potassium-transporting] C chain) (Potassium-binding and translocating subunit C) (Potassium-translocating ATPase C chain)	kdpC LMOf2365_2660	Listeria monocytogenes serotype 4b (strain F2365)	SUBCELLULAR LOCATION: Cell membrane {ECO:0000255|HAMAP-Rule:MF_00276}; Single-pass membrane protein {ECO:0000255|HAMAP-Rule:MF_00276}.
Q8Y3Z8	3.6.3.12		Potassium-transporting ATPase C chain (EC 3.6.3.12) (ATP phosphohydrolase [potassium-transporting] C chain) (Potassium-binding and translocating subunit C) (Potassium-translocating ATPase C chain)	kdpC lmo2680	Listeria monocytogenes serovar 1/2a (strain ATCC BAA-679 / EGD-e)	SUBCELLULAR LOCATION: Cell membrane {ECO:0000255|HAMAP-Rule:MF_00276}; Single-pass membrane protein {ECO:0000255|HAMAP-Rule:MF_00276}.
A0AM15	3.6.3.12		Potassium-transporting ATPase C chain (EC 3.6.3.12) (ATP phosphohydrolase [potassium-transporting] C chain) (Potassium-binding and translocating subunit C) (Potassium-translocating ATPase C chain)	kdpC lwe2629	Listeria welshimeri serovar 6b (strain ATCC 35897 / DSM 20650 / SLCC5334)	SUBCELLULAR LOCATION: Cell membrane {ECO:0000255|HAMAP-Rule:MF_00276}; Single-pass membrane protein {ECO:0000255|HAMAP-Rule:MF_00276}.
B7L1N2	3.6.3.12		Potassium-transporting ATPase C chain (EC 3.6.3.12) (ATP phosphohydrolase [potassium-transporting] C chain) (Potassium-binding and translocating subunit C) (Potassium-translocating ATPase C chain)	kdpC Mchl_0180	Methylobacterium extorquens (strain CM4 / NCIMB 13688) (Methylobacterium chloromethanicum)	SUBCELLULAR LOCATION: Cell inner membrane {ECO:0000255|HAMAP-Rule:MF_00276}; Single-pass membrane protein {ECO:0000255|HAMAP-Rule:MF_00276}.
B8DAW2	3.6.3.12		Potassium-transporting ATPase C chain (EC 3.6.3.12) (ATP phosphohydrolase [potassium-transporting] C chain) (Potassium-binding and translocating subunit C) (Potassium-translocating ATPase C chain)	kdpC LMHCC_2856	Listeria monocytogenes serotype 4a (strain HCC23)	SUBCELLULAR LOCATION: Cell membrane {ECO:0000255|HAMAP-Rule:MF_00276}; Single-pass membrane protein {ECO:0000255|HAMAP-Rule:MF_00276}.
Q605R3	3.6.3.12		Potassium-transporting ATPase C chain (EC 3.6.3.12) (ATP phosphohydrolase [potassium-transporting] C chain) (Potassium-binding and translocating subunit C) (Potassium-translocating ATPase C chain)	kdpC MCA2215	Methylococcus capsulatus (strain ATCC 33009 / NCIMB 11132 / Bath)	SUBCELLULAR LOCATION: Cell inner membrane {ECO:0000255|HAMAP-Rule:MF_00276}; Single-pass membrane protein {ECO:0000255|HAMAP-Rule:MF_00276}.
A9VZA4	3.6.3.12		Potassium-transporting ATPase C chain (EC 3.6.3.12) (ATP phosphohydrolase [potassium-transporting] C chain) (Potassium-binding and translocating subunit C) (Potassium-translocating ATPase C chain)	kdpC Mext_0235	Methylobacterium extorquens (strain PA1)	SUBCELLULAR LOCATION: Cell inner membrane {ECO:0000255|HAMAP-Rule:MF_00276}; Single-pass membrane protein {ECO:0000255|HAMAP-Rule:MF_00276}.
B3DWJ8	3.6.3.12		Potassium-transporting ATPase C chain (EC 3.6.3.12) (ATP phosphohydrolase [potassium-transporting] C chain) (Potassium-binding and translocating subunit C) (Potassium-translocating ATPase C chain)	kdpC Minf_0033	Methylacidiphilum infernorum (isolate V4) (Methylokorus infernorum (strain V4))	SUBCELLULAR LOCATION: Cell inner membrane {ECO:0000255|HAMAP-Rule:MF_00276}; Single-pass membrane protein {ECO:0000255|HAMAP-Rule:MF_00276}.
B8I9I8	3.6.3.12		Potassium-transporting ATPase C chain (EC 3.6.3.12) (ATP phosphohydrolase [potassium-transporting] C chain) (Potassium-binding and translocating subunit C) (Potassium-translocating ATPase C chain)	kdpC Mnod_0196	Methylobacterium nodulans (strain ORS2060 / LMG 21967)	SUBCELLULAR LOCATION: Cell inner membrane {ECO:0000255|HAMAP-Rule:MF_00276}; Single-pass membrane protein {ECO:0000255|HAMAP-Rule:MF_00276}.
B1Z9X9	3.6.3.12		Potassium-transporting ATPase C chain (EC 3.6.3.12) (ATP phosphohydrolase [potassium-transporting] C chain) (Potassium-binding and translocating subunit C) (Potassium-translocating ATPase C chain)	kdpC Mpop_0951	Methylobacterium populi (strain ATCC BAA-705 / NCIMB 13946 / BJ001)	SUBCELLULAR LOCATION: Cell inner membrane {ECO:0000255|HAMAP-Rule:MF_00276}; Single-pass membrane protein {ECO:0000255|HAMAP-Rule:MF_00276}.
B8GER0	3.6.3.12		Potassium-transporting ATPase C chain (EC 3.6.3.12) (ATP phosphohydrolase [potassium-transporting] C chain) (Potassium-binding and translocating subunit C) (Potassium-translocating ATPase C chain)	kdpC Mpal_2486	Methanosphaerula palustris (strain ATCC BAA-1556 / DSM 19958 / E1-9c)	SUBCELLULAR LOCATION: Cell membrane {ECO:0000255|HAMAP-Rule:MF_00276}; Single-pass membrane protein {ECO:0000255|HAMAP-Rule:MF_00276}.
A2SIS1	3.6.3.12		Potassium-transporting ATPase C chain (EC 3.6.3.12) (ATP phosphohydrolase [potassium-transporting] C chain) (Potassium-binding and translocating subunit C) (Potassium-translocating ATPase C chain)	kdpC Mpe_A2505	Methylibium petroleiphilum (strain PM1)	SUBCELLULAR LOCATION: Cell inner membrane {ECO:0000255|HAMAP-Rule:MF_00276}; Single-pass membrane protein {ECO:0000255|HAMAP-Rule:MF_00276}.
B1M7D4	3.6.3.12		Potassium-transporting ATPase C chain (EC 3.6.3.12) (ATP phosphohydrolase [potassium-transporting] C chain) (Potassium-binding and translocating subunit C) (Potassium-translocating ATPase C chain)	kdpC Mrad2831_0206	Methylobacterium radiotolerans (strain ATCC 27329 / DSM 1819 / JCM 2831)	SUBCELLULAR LOCATION: Cell inner membrane {ECO:0000255|HAMAP-Rule:MF_00276}; Single-pass membrane protein {ECO:0000255|HAMAP-Rule:MF_00276}.
B8ETA0	3.6.3.12		Potassium-transporting ATPase C chain (EC 3.6.3.12) (ATP phosphohydrolase [potassium-transporting] C chain) (Potassium-binding and translocating subunit C) (Potassium-translocating ATPase C chain)	kdpC Msil_2824	Methylocella silvestris (strain BL2 / DSM 15510 / NCIMB 13906)	SUBCELLULAR LOCATION: Cell inner membrane {ECO:0000255|HAMAP-Rule:MF_00276}; Single-pass membrane protein {ECO:0000255|HAMAP-Rule:MF_00276}.
B0JJA1	3.6.3.12		Potassium-transporting ATPase C chain (EC 3.6.3.12) (ATP phosphohydrolase [potassium-transporting] C chain) (Potassium-binding and translocating subunit C) (Potassium-translocating ATPase C chain)	kdpC MAE_59870	Microcystis aeruginosa (strain NIES-843)	SUBCELLULAR LOCATION: Cell inner membrane {ECO:0000255|HAMAP-Rule:MF_00276}; Single-pass membrane protein {ECO:0000255|HAMAP-Rule:MF_00276}.
P65212	3.6.3.12		Potassium-transporting ATPase C chain (EC 3.6.3.12) (ATP phosphohydrolase [potassium-transporting] C chain) (Potassium-binding and translocating subunit C) (Potassium-translocating ATPase C chain)	kdpC Mb1060	Mycobacterium bovis (strain ATCC BAA-935 / AF2122/97)	SUBCELLULAR LOCATION: Cell membrane {ECO:0000250}; Single-pass membrane protein {ECO:0000250}.			P65212;
A1KHH0	3.6.3.12		Potassium-transporting ATPase C chain (EC 3.6.3.12) (ATP phosphohydrolase [potassium-transporting] C chain) (Potassium-binding and translocating subunit C) (Potassium-translocating ATPase C chain)	kdpC BCG_1089	Mycobacterium bovis (strain BCG / Pasteur 1173P2)	SUBCELLULAR LOCATION: Cell membrane {ECO:0000255|HAMAP-Rule:MF_00276}; Single-pass membrane protein {ECO:0000255|HAMAP-Rule:MF_00276}.			A1KHH0;
C1AM23	3.6.3.12		Potassium-transporting ATPase C chain (EC 3.6.3.12) (ATP phosphohydrolase [potassium-transporting] C chain) (Potassium-binding and translocating subunit C) (Potassium-translocating ATPase C chain)	kdpC JTY_1061	Mycobacterium bovis (strain BCG / Tokyo 172 / ATCC 35737 / TMC 1019)	SUBCELLULAR LOCATION: Cell membrane {ECO:0000255|HAMAP-Rule:MF_00276}; Single-pass membrane protein {ECO:0000255|HAMAP-Rule:MF_00276}.			C1AM23;
A5U175	3.6.3.12		Potassium-transporting ATPase C chain (EC 3.6.3.12) (ATP phosphohydrolase [potassium-transporting] C chain) (Potassium-binding and translocating subunit C) (Potassium-translocating ATPase C chain)	kdpC MRA_1039	Mycobacterium tuberculosis (strain ATCC 25177 / H37Ra)	SUBCELLULAR LOCATION: Cell membrane {ECO:0000255|HAMAP-Rule:MF_00276}; Single-pass membrane protein {ECO:0000255|HAMAP-Rule:MF_00276}.			A5U175;
P9WKF0	3.6.3.12		Potassium-transporting ATPase C chain (EC 3.6.3.12) (ATP phosphohydrolase [potassium-transporting] C chain) (Potassium-binding and translocating subunit C) (Potassium-translocating ATPase C chain)	kdpC MT1060	Mycobacterium tuberculosis (strain CDC 1551 / Oshkosh)	SUBCELLULAR LOCATION: Cell membrane {ECO:0000250}; Single-pass membrane protein {ECO:0000250}.			P9WKF0;
P9WKF1	3.6.3.12		Potassium-transporting ATPase C chain (EC 3.6.3.12) (ATP phosphohydrolase [potassium-transporting] C chain) (Potassium-binding and translocating subunit C) (Potassium-translocating ATPase C chain)	kdpC Rv1031 MTCY10G2.18c	Mycobacterium tuberculosis (strain ATCC 25618 / H37Rv)	SUBCELLULAR LOCATION: Cell membrane {ECO:0000250}; Single-pass membrane protein {ECO:0000250}.			P9WKF1;
Q93MV4	3.6.3.12		Potassium-transporting ATPase C chain (EC 3.6.3.12) (ATP phosphohydrolase [potassium-transporting] C chain) (Potassium-binding and translocating subunit C) (Potassium-translocating ATPase C chain)	kdpC	Myxococcus xanthus	SUBCELLULAR LOCATION: Cell membrane {ECO:0000255|HAMAP-Rule:MF_00276}; Single-pass membrane protein {ECO:0000255|HAMAP-Rule:MF_00276}.
Q1DFX4	3.6.3.12		Potassium-transporting ATPase C chain (EC 3.6.3.12) (ATP phosphohydrolase [potassium-transporting] C chain) (Potassium-binding and translocating subunit C) (Potassium-translocating ATPase C chain)	kdpC MXAN_0166	Myxococcus xanthus (strain DK 1622)	SUBCELLULAR LOCATION: Cell inner membrane {ECO:0000255|HAMAP-Rule:MF_00276}; Single-pass membrane protein {ECO:0000255|HAMAP-Rule:MF_00276}.
Q1QJ48	3.6.3.12		Potassium-transporting ATPase C chain (EC 3.6.3.12) (ATP phosphohydrolase [potassium-transporting] C chain) (Potassium-binding and translocating subunit C) (Potassium-translocating ATPase C chain)	kdpC Nham_2992	Nitrobacter hamburgensis (strain X14 / DSM 10229)	SUBCELLULAR LOCATION: Cell inner membrane {ECO:0000255|HAMAP-Rule:MF_00276}; Single-pass membrane protein {ECO:0000255|HAMAP-Rule:MF_00276}.
A6X5I0	3.6.3.12		Potassium-transporting ATPase C chain (EC 3.6.3.12) (ATP phosphohydrolase [potassium-transporting] C chain) (Potassium-binding and translocating subunit C) (Potassium-translocating ATPase C chain)	kdpC Oant_3778	Ochrobactrum anthropi (strain ATCC 49188 / DSM 6882 / NCTC 12168)	SUBCELLULAR LOCATION: Cell inner membrane {ECO:0000255|HAMAP-Rule:MF_00276}; Single-pass membrane protein {ECO:0000255|HAMAP-Rule:MF_00276}.
B6JA60	3.6.3.12		Potassium-transporting ATPase C chain (EC 3.6.3.12) (ATP phosphohydrolase [potassium-transporting] C chain) (Potassium-binding and translocating subunit C) (Potassium-translocating ATPase C chain)	kdpC OCAR_4177 OCA5_c03370	Oligotropha carboxidovorans (strain ATCC 49405 / DSM 1227 / OM5)	SUBCELLULAR LOCATION: Cell inner membrane {ECO:0000255|HAMAP-Rule:MF_00276}; Single-pass membrane protein {ECO:0000255|HAMAP-Rule:MF_00276}.
A7HRV5	3.6.3.12		Potassium-transporting ATPase C chain (EC 3.6.3.12) (ATP phosphohydrolase [potassium-transporting] C chain) (Potassium-binding and translocating subunit C) (Potassium-translocating ATPase C chain)	kdpC Plav_1015	Parvibaculum lavamentivorans (strain DS-1 / DSM 13023 / NCIMB 13966)	SUBCELLULAR LOCATION: Cell inner membrane {ECO:0000255|HAMAP-Rule:MF_00276}; Single-pass membrane protein {ECO:0000255|HAMAP-Rule:MF_00276}.
Q6D7I5	3.6.3.12		Potassium-transporting ATPase C chain (EC 3.6.3.12) (ATP phosphohydrolase [potassium-transporting] C chain) (Potassium-binding and translocating subunit C) (Potassium-translocating ATPase C chain)	kdpC ECA1340	Pectobacterium atrosepticum (strain SCRI 1043 / ATCC BAA-672) (Erwinia carotovora subsp. atroseptica)	SUBCELLULAR LOCATION: Cell inner membrane {ECO:0000255|HAMAP-Rule:MF_00276}; Single-pass membrane protein {ECO:0000255|HAMAP-Rule:MF_00276}.
Q186E8	3.6.3.12		Potassium-transporting ATPase C chain (EC 3.6.3.12) (ATP phosphohydrolase [potassium-transporting] C chain) (Potassium-binding and translocating subunit C) (Potassium-translocating ATPase C chain)	kdpC CD630_15930	Peptoclostridium difficile (strain 630) (Clostridium difficile)	SUBCELLULAR LOCATION: Cell membrane {ECO:0000255|HAMAP-Rule:MF_00276}; Single-pass membrane protein {ECO:0000255|HAMAP-Rule:MF_00276}.			Q186E8;
Q7N6W7	3.6.3.12		Potassium-transporting ATPase C chain (EC 3.6.3.12) (ATP phosphohydrolase [potassium-transporting] C chain) (Potassium-binding and translocating subunit C) (Potassium-translocating ATPase C chain)	kdpC plu1418	Photorhabdus luminescens subsp. laumondii (strain TT01)	SUBCELLULAR LOCATION: Cell inner membrane {ECO:0000255|HAMAP-Rule:MF_00276}; Single-pass membrane protein {ECO:0000255|HAMAP-Rule:MF_00276}.
A1VTC0	3.6.3.12		Potassium-transporting ATPase C chain (EC 3.6.3.12) (ATP phosphohydrolase [potassium-transporting] C chain) (Potassium-binding and translocating subunit C) (Potassium-translocating ATPase C chain)	kdpC Pnap_3602	Polaromonas naphthalenivorans (strain CJ2)	SUBCELLULAR LOCATION: Cell inner membrane {ECO:0000255|HAMAP-Rule:MF_00276}; Single-pass membrane protein {ECO:0000255|HAMAP-Rule:MF_00276}.
A4SZG7	3.6.3.12		Potassium-transporting ATPase C chain (EC 3.6.3.12) (ATP phosphohydrolase [potassium-transporting] C chain) (Potassium-binding and translocating subunit C) (Potassium-translocating ATPase C chain)	kdpC Pnuc_1668	Polynucleobacter necessarius subsp. asymbioticus (strain DSM 18221 / CIP 109841 / QLW-P1DMWA-1)	SUBCELLULAR LOCATION: Cell membrane {ECO:0000255|HAMAP-Rule:MF_00276}; Single-pass membrane protein {ECO:0000255|HAMAP-Rule:MF_00276}.
Q48K34	3.6.3.12		Potassium-transporting ATPase C chain (EC 3.6.3.12) (ATP phosphohydrolase [potassium-transporting] C chain) (Potassium-binding and translocating subunit C) (Potassium-translocating ATPase C chain)	kdpC PSPPH_2020	Pseudomonas syringae pv. phaseolicola (strain 1448A / Race 6)	SUBCELLULAR LOCATION: Cell inner membrane {ECO:0000255|HAMAP-Rule:MF_00276}; Single-pass membrane protein {ECO:0000255|HAMAP-Rule:MF_00276}.
B7UV86	3.6.3.12		Potassium-transporting ATPase C chain (EC 3.6.3.12) (ATP phosphohydrolase [potassium-transporting] C chain) (Potassium-binding and translocating subunit C) (Potassium-translocating ATPase C chain)	kdpC PLES_36921	Pseudomonas aeruginosa (strain LESB58)	SUBCELLULAR LOCATION: Cell inner membrane {ECO:0000255|HAMAP-Rule:MF_00276}; Single-pass membrane protein {ECO:0000255|HAMAP-Rule:MF_00276}.
Q02KC0	3.6.3.12		Potassium-transporting ATPase C chain (EC 3.6.3.12) (ATP phosphohydrolase [potassium-transporting] C chain) (Potassium-binding and translocating subunit C) (Potassium-translocating ATPase C chain)	kdpC PA14_43370	Pseudomonas aeruginosa (strain UCBPP-PA14)	SUBCELLULAR LOCATION: Cell inner membrane {ECO:0000255|HAMAP-Rule:MF_00276}; Single-pass membrane protein {ECO:0000255|HAMAP-Rule:MF_00276}.
P57686	3.6.3.12		Potassium-transporting ATPase C chain (EC 3.6.3.12) (ATP phosphohydrolase [potassium-transporting] C chain) (Potassium-binding and translocating subunit C) (Potassium-translocating ATPase C chain)	kdpC PA1635	Pseudomonas aeruginosa (strain ATCC 15692 / PAO1 / 1C / PRS 101 / LMG 12228)	SUBCELLULAR LOCATION: Cell inner membrane {ECO:0000250}; Single-pass membrane protein {ECO:0000250}.
Q1I7P1	3.6.3.12		Potassium-transporting ATPase C chain (EC 3.6.3.12) (ATP phosphohydrolase [potassium-transporting] C chain) (Potassium-binding and translocating subunit C) (Potassium-translocating ATPase C chain)	kdpC PSEEN3607	Pseudomonas entomophila (strain L48)	SUBCELLULAR LOCATION: Cell inner membrane {ECO:0000255|HAMAP-Rule:MF_00276}; Single-pass membrane protein {ECO:0000255|HAMAP-Rule:MF_00276}.
A5W155	3.6.3.12		Potassium-transporting ATPase C chain (EC 3.6.3.12) (ATP phosphohydrolase [potassium-transporting] C chain) (Potassium-binding and translocating subunit C) (Potassium-translocating ATPase C chain)	kdpC Pput_1709	Pseudomonas putida (strain F1 / ATCC 700007)	SUBCELLULAR LOCATION: Cell inner membrane {ECO:0000255|HAMAP-Rule:MF_00276}; Single-pass membrane protein {ECO:0000255|HAMAP-Rule:MF_00276}.
B0KNU2	3.6.3.12		Potassium-transporting ATPase C chain (EC 3.6.3.12) (ATP phosphohydrolase [potassium-transporting] C chain) (Potassium-binding and translocating subunit C) (Potassium-translocating ATPase C chain)	kdpC PputGB1_3731	Pseudomonas putida (strain GB-1)	SUBCELLULAR LOCATION: Cell inner membrane {ECO:0000255|HAMAP-Rule:MF_00276}; Single-pass membrane protein {ECO:0000255|HAMAP-Rule:MF_00276}.
Q88FD8	3.6.3.12		Potassium-transporting ATPase C chain (EC 3.6.3.12) (ATP phosphohydrolase [potassium-transporting] C chain) (Potassium-binding and translocating subunit C) (Potassium-translocating ATPase C chain)	kdpC PP_4159	Pseudomonas putida (strain KT2440)	SUBCELLULAR LOCATION: Cell inner membrane {ECO:0000255|HAMAP-Rule:MF_00276}; Single-pass membrane protein {ECO:0000255|HAMAP-Rule:MF_00276}.
B1JAS8	3.6.3.12		Potassium-transporting ATPase C chain (EC 3.6.3.12) (ATP phosphohydrolase [potassium-transporting] C chain) (Potassium-binding and translocating subunit C) (Potassium-translocating ATPase C chain)	kdpC PputW619_3484	Pseudomonas putida (strain W619)	SUBCELLULAR LOCATION: Cell inner membrane {ECO:0000255|HAMAP-Rule:MF_00276}; Single-pass membrane protein {ECO:0000255|HAMAP-Rule:MF_00276}.			B1JAS8;
Q883V4	3.6.3.12		Potassium-transporting ATPase C chain (EC 3.6.3.12) (ATP phosphohydrolase [potassium-transporting] C chain) (Potassium-binding and translocating subunit C) (Potassium-translocating ATPase C chain)	kdpC PSPTO_2244	Pseudomonas syringae pv. tomato (strain DC3000)	SUBCELLULAR LOCATION: Cell inner membrane {ECO:0000255|HAMAP-Rule:MF_00276}; Single-pass membrane protein {ECO:0000255|HAMAP-Rule:MF_00276}.
Q8XU10	3.6.3.12		Potassium-transporting ATPase C chain (EC 3.6.3.12) (ATP phosphohydrolase [potassium-transporting] C chain) (Potassium-binding and translocating subunit C) (Potassium-translocating ATPase C chain)	kdpC RSc3384 RS02658	Ralstonia solanacearum (strain GMI1000) (Pseudomonas solanacearum)	SUBCELLULAR LOCATION: Cell inner membrane {ECO:0000255|HAMAP-Rule:MF_00276}; Single-pass membrane protein {ECO:0000255|HAMAP-Rule:MF_00276}.
Q98GX7	3.6.3.12		Potassium-transporting ATPase C chain (EC 3.6.3.12) (ATP phosphohydrolase [potassium-transporting] C chain) (Potassium-binding and translocating subunit C) (Potassium-translocating ATPase C chain)	kdpC mll3129	Rhizobium loti (strain MAFF303099) (Mesorhizobium loti)	SUBCELLULAR LOCATION: Cell inner membrane {ECO:0000255|HAMAP-Rule:MF_00276}; Single-pass membrane protein {ECO:0000255|HAMAP-Rule:MF_00276}.
Q92XJ1	3.6.3.12		Potassium-transporting ATPase C chain (EC 3.6.3.12) (ATP phosphohydrolase [potassium-transporting] C chain) (Potassium-binding and translocating subunit C) (Potassium-translocating ATPase C chain)	kdpC RA1253 SMa2329	Rhizobium meliloti (strain 1021) (Ensifer meliloti) (Sinorhizobium meliloti)	SUBCELLULAR LOCATION: Cell inner membrane {ECO:0000255|HAMAP-Rule:MF_00276}; Single-pass membrane protein {ECO:0000255|HAMAP-Rule:MF_00276}.
B6IQY7	3.6.3.12		Potassium-transporting ATPase C chain (EC 3.6.3.12) (ATP phosphohydrolase [potassium-transporting] C chain) (Potassium-binding and translocating subunit C) (Potassium-translocating ATPase C chain)	kdpC RC1_0434	Rhodospirillum centenum (strain ATCC 51521 / SW)	SUBCELLULAR LOCATION: Cell inner membrane {ECO:0000255|HAMAP-Rule:MF_00276}; Single-pass membrane protein {ECO:0000255|HAMAP-Rule:MF_00276}.
Q07HN8	3.6.3.12		Potassium-transporting ATPase C chain (EC 3.6.3.12) (ATP phosphohydrolase [potassium-transporting] C chain) (Potassium-binding and translocating subunit C) (Potassium-translocating ATPase C chain)	kdpC RPE_4626	Rhodopseudomonas palustris (strain BisA53)	SUBCELLULAR LOCATION: Cell inner membrane {ECO:0000255|HAMAP-Rule:MF_00276}; Single-pass membrane protein {ECO:0000255|HAMAP-Rule:MF_00276}.
Q6N5H2	3.6.3.12		Potassium-transporting ATPase C chain (EC 3.6.3.12) (ATP phosphohydrolase [potassium-transporting] C chain) (Potassium-binding and translocating subunit C) (Potassium-translocating ATPase C chain)	kdpC RPA3002	Rhodopseudomonas palustris (strain ATCC BAA-98 / CGA009)	SUBCELLULAR LOCATION: Cell inner membrane {ECO:0000255|HAMAP-Rule:MF_00276}; Single-pass membrane protein {ECO:0000255|HAMAP-Rule:MF_00276}.
Q20XR6	3.6.3.12		Potassium-transporting ATPase C chain (EC 3.6.3.12) (ATP phosphohydrolase [potassium-transporting] C chain) (Potassium-binding and translocating subunit C) (Potassium-translocating ATPase C chain)	kdpC RPC_4548	Rhodopseudomonas palustris (strain BisB18)	SUBCELLULAR LOCATION: Cell inner membrane {ECO:0000255|HAMAP-Rule:MF_00276}; Single-pass membrane protein {ECO:0000255|HAMAP-Rule:MF_00276}.
Q13DD7	3.6.3.12		Potassium-transporting ATPase C chain (EC 3.6.3.12) (ATP phosphohydrolase [potassium-transporting] C chain) (Potassium-binding and translocating subunit C) (Potassium-translocating ATPase C chain)	kdpC RPD_0664	Rhodopseudomonas palustris (strain BisB5)	SUBCELLULAR LOCATION: Cell inner membrane {ECO:0000255|HAMAP-Rule:MF_00276}; Single-pass membrane protein {ECO:0000255|HAMAP-Rule:MF_00276}.
B3Q8S9	3.6.3.12		Potassium-transporting ATPase C chain (EC 3.6.3.12) (ATP phosphohydrolase [potassium-transporting] C chain) (Potassium-binding and translocating subunit C) (Potassium-translocating ATPase C chain)	kdpC Rpal_3411	Rhodopseudomonas palustris (strain TIE-1)	SUBCELLULAR LOCATION: Cell inner membrane {ECO:0000255|HAMAP-Rule:MF_00276}; Single-pass membrane protein {ECO:0000255|HAMAP-Rule:MF_00276}.
Q2RV87	3.6.3.12		Potassium-transporting ATPase C chain (EC 3.6.3.12) (ATP phosphohydrolase [potassium-transporting] C chain) (Potassium-binding and translocating subunit C) (Potassium-translocating ATPase C chain)	kdpC Rru_A1157	Rhodospirillum rubrum (strain ATCC 11170 / NCIB 8255)	SUBCELLULAR LOCATION: Cell inner membrane {ECO:0000255|HAMAP-Rule:MF_00276}; Single-pass membrane protein {ECO:0000255|HAMAP-Rule:MF_00276}.
A3PNW1	3.6.3.12		Potassium-transporting ATPase C chain (EC 3.6.3.12) (ATP phosphohydrolase [potassium-transporting] C chain) (Potassium-binding and translocating subunit C) (Potassium-translocating ATPase C chain)	kdpC Rsph17029_2925	Rhodobacter sphaeroides (strain ATCC 17029 / ATH 2.4.9)	SUBCELLULAR LOCATION: Cell inner membrane {ECO:0000255|HAMAP-Rule:MF_00276}; Single-pass membrane protein {ECO:0000255|HAMAP-Rule:MF_00276}.
Q3IYD8	3.6.3.12		Potassium-transporting ATPase C chain (EC 3.6.3.12) (ATP phosphohydrolase [potassium-transporting] C chain) (Potassium-binding and translocating subunit C) (Potassium-translocating ATPase C chain)	kdpC RHOS4_28780 RSP_1267	Rhodobacter sphaeroides (strain ATCC 17023 / 2.4.1 / NCIB 8253 / DSM 158)	SUBCELLULAR LOCATION: Cell inner membrane {ECO:0000255|HAMAP-Rule:MF_00276}; Single-pass membrane protein {ECO:0000255|HAMAP-Rule:MF_00276}.
B9KPZ0	3.6.3.12		Potassium-transporting ATPase C chain (EC 3.6.3.12) (ATP phosphohydrolase [potassium-transporting] C chain) (Potassium-binding and translocating subunit C) (Potassium-translocating ATPase C chain)	kdpC RSKD131_2665	Rhodobacter sphaeroides (strain KD131 / KCTC 12085)	SUBCELLULAR LOCATION: Cell inner membrane {ECO:0000255|HAMAP-Rule:MF_00276}; Single-pass membrane protein {ECO:0000255|HAMAP-Rule:MF_00276}.
B5EZE2	3.6.3.12		Potassium-transporting ATPase C chain (EC 3.6.3.12) (ATP phosphohydrolase [potassium-transporting] C chain) (Potassium-binding and translocating subunit C) (Potassium-translocating ATPase C chain)	kdpC SeAg_B0752	Salmonella agona (strain SL483)	SUBCELLULAR LOCATION: Cell inner membrane {ECO:0000255|HAMAP-Rule:MF_00276}; Single-pass membrane protein {ECO:0000255|HAMAP-Rule:MF_00276}.
Q57RN1	3.6.3.12		Potassium-transporting ATPase C chain (EC 3.6.3.12) (ATP phosphohydrolase [potassium-transporting] C chain) (Potassium-binding and translocating subunit C) (Potassium-translocating ATPase C chain)	kdpC SCH_0724	Salmonella choleraesuis (strain SC-B67)	SUBCELLULAR LOCATION: Cell inner membrane {ECO:0000255|HAMAP-Rule:MF_00276}; Single-pass membrane protein {ECO:0000255|HAMAP-Rule:MF_00276}.
B5FND9	3.6.3.12		Potassium-transporting ATPase C chain (EC 3.6.3.12) (ATP phosphohydrolase [potassium-transporting] C chain) (Potassium-binding and translocating subunit C) (Potassium-translocating ATPase C chain)	kdpC SeD_A0812	Salmonella dublin (strain CT_02021853)	SUBCELLULAR LOCATION: Cell inner membrane {ECO:0000255|HAMAP-Rule:MF_00276}; Single-pass membrane protein {ECO:0000255|HAMAP-Rule:MF_00276}.
B5QWE8	3.6.3.12		Potassium-transporting ATPase C chain (EC 3.6.3.12) (ATP phosphohydrolase [potassium-transporting] C chain) (Potassium-binding and translocating subunit C) (Potassium-translocating ATPase C chain)	kdpC SEN0668	Salmonella enteritidis PT4 (strain P125109)	SUBCELLULAR LOCATION: Cell inner membrane {ECO:0000255|HAMAP-Rule:MF_00276}; Single-pass membrane protein {ECO:0000255|HAMAP-Rule:MF_00276}.
B5R669	3.6.3.12		Potassium-transporting ATPase C chain (EC 3.6.3.12) (ATP phosphohydrolase [potassium-transporting] C chain) (Potassium-binding and translocating subunit C) (Potassium-translocating ATPase C chain)	kdpC SG0701	Salmonella gallinarum (strain 287/91 / NCTC 13346)	SUBCELLULAR LOCATION: Cell inner membrane {ECO:0000255|HAMAP-Rule:MF_00276}; Single-pass membrane protein {ECO:0000255|HAMAP-Rule:MF_00276}.
B4TBA5	3.6.3.12		Potassium-transporting ATPase C chain (EC 3.6.3.12) (ATP phosphohydrolase [potassium-transporting] C chain) (Potassium-binding and translocating subunit C) (Potassium-translocating ATPase C chain)	kdpC SeHA_C0826	Salmonella heidelberg (strain SL476)	SUBCELLULAR LOCATION: Cell inner membrane {ECO:0000255|HAMAP-Rule:MF_00276}; Single-pass membrane protein {ECO:0000255|HAMAP-Rule:MF_00276}.
B4SZB0	3.6.3.12		Potassium-transporting ATPase C chain (EC 3.6.3.12) (ATP phosphohydrolase [potassium-transporting] C chain) (Potassium-binding and translocating subunit C) (Potassium-translocating ATPase C chain)	kdpC SNSL254_A0765	Salmonella newport (strain SL254)	SUBCELLULAR LOCATION: Cell inner membrane {ECO:0000255|HAMAP-Rule:MF_00276}; Single-pass membrane protein {ECO:0000255|HAMAP-Rule:MF_00276}.
A9MUE1	3.6.3.12		Potassium-transporting ATPase C chain (EC 3.6.3.12) (ATP phosphohydrolase [potassium-transporting] C chain) (Potassium-binding and translocating subunit C) (Potassium-translocating ATPase C chain)	kdpC SPAB_02832	Salmonella paratyphi B (strain ATCC BAA-1250 / SPB7)	SUBCELLULAR LOCATION: Cell inner membrane {ECO:0000255|HAMAP-Rule:MF_00276}; Single-pass membrane protein {ECO:0000255|HAMAP-Rule:MF_00276}.
B4TQ21	3.6.3.12		Potassium-transporting ATPase C chain (EC 3.6.3.12) (ATP phosphohydrolase [potassium-transporting] C chain) (Potassium-binding and translocating subunit C) (Potassium-translocating ATPase C chain)	kdpC SeSA_A0862	Salmonella schwarzengrund (strain CVM19633)	SUBCELLULAR LOCATION: Cell inner membrane {ECO:0000255|HAMAP-Rule:MF_00276}; Single-pass membrane protein {ECO:0000255|HAMAP-Rule:MF_00276}.
Q8Z8E6	3.6.3.12		Potassium-transporting ATPase C chain (EC 3.6.3.12) (ATP phosphohydrolase [potassium-transporting] C chain) (Potassium-binding and translocating subunit C) (Potassium-translocating ATPase C chain)	kdpC STY0745 t2171	Salmonella typhi	SUBCELLULAR LOCATION: Cell inner membrane {ECO:0000255|HAMAP-Rule:MF_00276}; Single-pass membrane protein {ECO:0000255|HAMAP-Rule:MF_00276}.
Q8ZQW3	3.6.3.12		Potassium-transporting ATPase C chain (EC 3.6.3.12) (ATP phosphohydrolase [potassium-transporting] C chain) (Potassium-binding and translocating subunit C) (Potassium-translocating ATPase C chain)	kdpC STM0704	Salmonella typhimurium (strain LT2 / SGSC1412 / ATCC 700720)	SUBCELLULAR LOCATION: Cell inner membrane {ECO:0000255|HAMAP-Rule:MF_00276}; Single-pass membrane protein {ECO:0000255|HAMAP-Rule:MF_00276}.
A8GB60	3.6.3.12		Potassium-transporting ATPase C chain (EC 3.6.3.12) (ATP phosphohydrolase [potassium-transporting] C chain) (Potassium-binding and translocating subunit C) (Potassium-translocating ATPase C chain)	kdpC Spro_1246	Serratia proteamaculans (strain 568)	SUBCELLULAR LOCATION: Cell inner membrane {ECO:0000255|HAMAP-Rule:MF_00276}; Single-pass membrane protein {ECO:0000255|HAMAP-Rule:MF_00276}.
A4YA10	3.6.3.12		Potassium-transporting ATPase C chain (EC 3.6.3.12) (ATP phosphohydrolase [potassium-transporting] C chain) (Potassium-binding and translocating subunit C) (Potassium-translocating ATPase C chain)	kdpC Sputcn32_3080	Shewanella putrefaciens (strain CN-32 / ATCC BAA-453)	SUBCELLULAR LOCATION: Cell inner membrane {ECO:0000255|HAMAP-Rule:MF_00276}; Single-pass membrane protein {ECO:0000255|HAMAP-Rule:MF_00276}.
Q32IN4	3.6.3.12		Potassium-transporting ATPase C chain (EC 3.6.3.12) (ATP phosphohydrolase [potassium-transporting] C chain) (Potassium-binding and translocating subunit C) (Potassium-translocating ATPase C chain)	kdpC SDY_0631	Shigella dysenteriae serotype 1 (strain Sd197)	SUBCELLULAR LOCATION: Cell inner membrane {ECO:0000255|HAMAP-Rule:MF_00276}; Single-pass membrane protein {ECO:0000255|HAMAP-Rule:MF_00276}.
Q0T6U0	3.6.3.12		Potassium-transporting ATPase C chain (EC 3.6.3.12) (ATP phosphohydrolase [potassium-transporting] C chain) (Potassium-binding and translocating subunit C) (Potassium-translocating ATPase C chain)	kdpC SFV_0637	Shigella flexneri serotype 5b (strain 8401)	SUBCELLULAR LOCATION: Cell inner membrane {ECO:0000255|HAMAP-Rule:MF_00276}; Single-pass membrane protein {ECO:0000255|HAMAP-Rule:MF_00276}.
Q3Z4A7	3.6.3.12		Potassium-transporting ATPase C chain (EC 3.6.3.12) (ATP phosphohydrolase [potassium-transporting] C chain) (Potassium-binding and translocating subunit C) (Potassium-translocating ATPase C chain)	kdpC SSON_0647	Shigella sonnei (strain Ss046)	SUBCELLULAR LOCATION: Cell inner membrane {ECO:0000255|HAMAP-Rule:MF_00276}; Single-pass membrane protein {ECO:0000255|HAMAP-Rule:MF_00276}.
Q2NW73	3.6.3.12		Potassium-transporting ATPase C chain (EC 3.6.3.12) (ATP phosphohydrolase [potassium-transporting] C chain) (Potassium-binding and translocating subunit C) (Potassium-translocating ATPase C chain)	kdpC SG0327	Sodalis glossinidius (strain morsitans)	SUBCELLULAR LOCATION: Cell inner membrane {ECO:0000255|HAMAP-Rule:MF_00276}; Single-pass membrane protein {ECO:0000255|HAMAP-Rule:MF_00276}.
Q02CX5	3.6.3.12		Potassium-transporting ATPase C chain (EC 3.6.3.12) (ATP phosphohydrolase [potassium-transporting] C chain) (Potassium-binding and translocating subunit C) (Potassium-translocating ATPase C chain)	kdpC Acid_0075	Solibacter usitatus (strain Ellin6076)	SUBCELLULAR LOCATION: Cell inner membrane {ECO:0000255|HAMAP-Rule:MF_00276}; Single-pass membrane protein {ECO:0000255|HAMAP-Rule:MF_00276}.
A9F781	3.6.3.12		Potassium-transporting ATPase C chain (EC 3.6.3.12) (ATP phosphohydrolase [potassium-transporting] C chain) (Potassium-binding and translocating subunit C) (Potassium-translocating ATPase C chain)	kdpC sce1354	Sorangium cellulosum (strain So ce56) (Polyangium cellulosum (strain So ce56))	SUBCELLULAR LOCATION: Cell inner membrane {ECO:0000255|HAMAP-Rule:MF_00276}; Single-pass membrane protein {ECO:0000255|HAMAP-Rule:MF_00276}.
Q2FF50	3.6.3.12		Potassium-transporting ATPase C chain (EC 3.6.3.12) (ATP phosphohydrolase [potassium-transporting] C chain) (Potassium-binding and translocating subunit C) (Potassium-translocating ATPase C chain)	kdpC SAUSA300_2032	Staphylococcus aureus (strain USA300)	SUBCELLULAR LOCATION: Cell membrane {ECO:0000255|HAMAP-Rule:MF_00276}; Single-pass membrane protein {ECO:0000255|HAMAP-Rule:MF_00276}.
Q2FWI1	3.6.3.12		Potassium-transporting ATPase C chain (EC 3.6.3.12) (ATP phosphohydrolase [potassium-transporting] C chain) (Potassium-binding and translocating subunit C) (Potassium-translocating ATPase C chain)	kdpC SAOUHSC_02310	Staphylococcus aureus (strain NCTC 8325)	SUBCELLULAR LOCATION: Cell membrane {ECO:0000255|HAMAP-Rule:MF_00276}; Single-pass membrane protein {ECO:0000255|HAMAP-Rule:MF_00276}.
Q2YUH8	3.6.3.12		Potassium-transporting ATPase C chain (EC 3.6.3.12) (ATP phosphohydrolase [potassium-transporting] C chain) (Potassium-binding and translocating subunit C) (Potassium-translocating ATPase C chain)	kdpC SAB1960c	Staphylococcus aureus (strain bovine RF122 / ET3-1)	SUBCELLULAR LOCATION: Cell membrane {ECO:0000255|HAMAP-Rule:MF_00276}; Single-pass membrane protein {ECO:0000255|HAMAP-Rule:MF_00276}.
Q5HEC5	3.6.3.12		Potassium-transporting ATPase C chain (EC 3.6.3.12) (ATP phosphohydrolase [potassium-transporting] C chain) (Potassium-binding and translocating subunit C) (Potassium-translocating ATPase C chain)	kdpC SACOL2066	Staphylococcus aureus (strain COL)	SUBCELLULAR LOCATION: Cell membrane {ECO:0000255|HAMAP-Rule:MF_00276}; Single-pass membrane protein {ECO:0000255|HAMAP-Rule:MF_00276}.
A6QIS0	3.6.3.12		Potassium-transporting ATPase C chain (EC 3.6.3.12) (ATP phosphohydrolase [potassium-transporting] C chain) (Potassium-binding and translocating subunit C) (Potassium-translocating ATPase C chain)	kdpC NWMN_1980	Staphylococcus aureus (strain Newman)	SUBCELLULAR LOCATION: Cell membrane {ECO:0000255|HAMAP-Rule:MF_00276}; Single-pass membrane protein {ECO:0000255|HAMAP-Rule:MF_00276}.
Q6GEZ8	3.6.3.12		Potassium-transporting ATPase C chain (EC 3.6.3.12) (ATP phosphohydrolase [potassium-transporting] C chain) (Potassium-binding and translocating subunit C) (Potassium-translocating ATPase C chain)	kdpC SAR2163	Staphylococcus aureus (strain MRSA252)	SUBCELLULAR LOCATION: Cell membrane {ECO:0000255|HAMAP-Rule:MF_00276}; Single-pass membrane protein {ECO:0000255|HAMAP-Rule:MF_00276}.
Q6G7N4	3.6.3.12		Potassium-transporting ATPase C chain (EC 3.6.3.12) (ATP phosphohydrolase [potassium-transporting] C chain) (Potassium-binding and translocating subunit C) (Potassium-translocating ATPase C chain)	kdpC SAS1980	Staphylococcus aureus (strain MSSA476)	SUBCELLULAR LOCATION: Cell membrane {ECO:0000255|HAMAP-Rule:MF_00276}; Single-pass membrane protein {ECO:0000255|HAMAP-Rule:MF_00276}.
A8Z4X8	3.6.3.12		Potassium-transporting ATPase C chain (EC 3.6.3.12) (ATP phosphohydrolase [potassium-transporting] C chain) (Potassium-binding and translocating subunit C) (Potassium-translocating ATPase C chain)	kdpC USA300HOU_2070	Staphylococcus aureus (strain USA300 / TCH1516)	SUBCELLULAR LOCATION: Cell membrane {ECO:0000255|HAMAP-Rule:MF_00276}; Single-pass membrane protein {ECO:0000255|HAMAP-Rule:MF_00276}.
Q8NVI3	3.6.3.12		Potassium-transporting ATPase C chain (EC 3.6.3.12) (ATP phosphohydrolase [potassium-transporting] C chain) (Potassium-binding and translocating subunit C) (Potassium-translocating ATPase C chain)	kdpC MW1999	Staphylococcus aureus (strain MW2)	SUBCELLULAR LOCATION: Cell membrane {ECO:0000255|HAMAP-Rule:MF_00276}; Single-pass membrane protein {ECO:0000255|HAMAP-Rule:MF_00276}.
Q5HK65	3.6.3.12		Potassium-transporting ATPase C chain (EC 3.6.3.12) (ATP phosphohydrolase [potassium-transporting] C chain) (Potassium-binding and translocating subunit C) (Potassium-translocating ATPase C chain)	kdpC SERP2485	Staphylococcus epidermidis (strain ATCC 35984 / RP62A)	SUBCELLULAR LOCATION: Cell membrane {ECO:0000255|HAMAP-Rule:MF_00276}; Single-pass membrane protein {ECO:0000255|HAMAP-Rule:MF_00276}.
Q4LAI1	3.6.3.12		Potassium-transporting ATPase C chain (EC 3.6.3.12) (ATP phosphohydrolase [potassium-transporting] C chain) (Potassium-binding and translocating subunit C) (Potassium-translocating ATPase C chain)	kdpC SH0035	Staphylococcus haemolyticus (strain JCSC1435)	SUBCELLULAR LOCATION: Cell membrane {ECO:0000255|HAMAP-Rule:MF_00276}; Single-pass membrane protein {ECO:0000255|HAMAP-Rule:MF_00276}.
Q82PI5	3.6.3.12		Potassium-transporting ATPase C chain (EC 3.6.3.12) (ATP phosphohydrolase [potassium-transporting] C chain) (Potassium-binding and translocating subunit C) (Potassium-translocating ATPase C chain)	kdpC SAV_917	Streptomyces avermitilis (strain ATCC 31267 / DSM 46492 / JCM 5070 / NCIMB 12804 / NRRL 8165 / MA-4680)	SUBCELLULAR LOCATION: Cell membrane {ECO:0000255|HAMAP-Rule:MF_00276}; Single-pass membrane protein {ECO:0000255|HAMAP-Rule:MF_00276}.
Q9X8Z8	3.6.3.12		Potassium-transporting ATPase C chain (EC 3.6.3.12) (ATP phosphohydrolase [potassium-transporting] C chain) (Potassium-binding and translocating subunit C) (Potassium-translocating ATPase C chain)	kdpC SCO3716 SCH35.08	Streptomyces coelicolor (strain ATCC BAA-471 / A3(2) / M145)	SUBCELLULAR LOCATION: Cell membrane {ECO:0000250}; Single-pass membrane protein {ECO:0000250}.
P73869	3.6.3.12		Potassium-transporting ATPase C chain (EC 3.6.3.12) (ATP phosphohydrolase [potassium-transporting] C chain) (Potassium-binding and translocating subunit C) (Potassium-translocating ATPase C chain)	kdpC slr1730	Synechocystis sp. (strain PCC 6803 / Kazusa)	SUBCELLULAR LOCATION: Cell inner membrane {ECO:0000250}; Single-pass membrane protein {ECO:0000250}.
P57688	3.6.3.12		Potassium-transporting ATPase C chain (EC 3.6.3.12) (ATP phosphohydrolase [potassium-transporting] C chain) (Potassium-binding and translocating subunit C) (Potassium-translocating ATPase C chain)	kdpC Ta1308	Thermoplasma acidophilum (strain ATCC 25905 / DSM 1728 / JCM 9062 / NBRC 15155 / AMRC-C165)	SUBCELLULAR LOCATION: Cell membrane {ECO:0000250}; Single-pass membrane protein {ECO:0000250}.
Q97BF5	3.6.3.12		Potassium-transporting ATPase C chain (EC 3.6.3.12) (ATP phosphohydrolase [potassium-transporting] C chain) (Potassium-binding and translocating subunit C) (Potassium-translocating ATPase C chain)	kdpC TV0501 TVG0489908	Thermoplasma volcanium (strain ATCC 51530 / DSM 4299 / JCM 9571 / NBRC 15438 / GSS1)	SUBCELLULAR LOCATION: Cell membrane {ECO:0000255|HAMAP-Rule:MF_00276}; Single-pass membrane protein {ECO:0000255|HAMAP-Rule:MF_00276}.			Q97BF5;
C5CPD2	3.6.3.12		Potassium-transporting ATPase C chain (EC 3.6.3.12) (ATP phosphohydrolase [potassium-transporting] C chain) (Potassium-binding and translocating subunit C) (Potassium-translocating ATPase C chain)	kdpC Vapar_4993	Variovorax paradoxus (strain S110)	SUBCELLULAR LOCATION: Cell inner membrane {ECO:0000255|HAMAP-Rule:MF_00276}; Single-pass membrane protein {ECO:0000255|HAMAP-Rule:MF_00276}.
Q8PPC8	3.6.3.12		Potassium-transporting ATPase C chain (EC 3.6.3.12) (ATP phosphohydrolase [potassium-transporting] C chain) (Potassium-binding and translocating subunit C) (Potassium-translocating ATPase C chain)	kdpC XAC0758	Xanthomonas axonopodis pv. citri (strain 306)	SUBCELLULAR LOCATION: Cell inner membrane {ECO:0000255|HAMAP-Rule:MF_00276}; Single-pass membrane protein {ECO:0000255|HAMAP-Rule:MF_00276}.
Q4UQV0	3.6.3.12		Potassium-transporting ATPase C chain (EC 3.6.3.12) (ATP phosphohydrolase [potassium-transporting] C chain) (Potassium-binding and translocating subunit C) (Potassium-translocating ATPase C chain)	kdpC XC_3530	Xanthomonas campestris pv. campestris (strain 8004)	SUBCELLULAR LOCATION: Cell inner membrane {ECO:0000255|HAMAP-Rule:MF_00276}; Single-pass membrane protein {ECO:0000255|HAMAP-Rule:MF_00276}.
B0RVC5	3.6.3.12		Potassium-transporting ATPase C chain (EC 3.6.3.12) (ATP phosphohydrolase [potassium-transporting] C chain) (Potassium-binding and translocating subunit C) (Potassium-translocating ATPase C chain)	kdpC xcc-b100_3651	Xanthomonas campestris pv. campestris (strain B100)	SUBCELLULAR LOCATION: Cell inner membrane {ECO:0000255|HAMAP-Rule:MF_00276}; Single-pass membrane protein {ECO:0000255|HAMAP-Rule:MF_00276}.
Q8PCM0	3.6.3.12		Potassium-transporting ATPase C chain (EC 3.6.3.12) (ATP phosphohydrolase [potassium-transporting] C chain) (Potassium-binding and translocating subunit C) (Potassium-translocating ATPase C chain)	kdpC XCC0704	Xanthomonas campestris pv. campestris (strain ATCC 33913 / NCPPB 528 / LMG 568)	SUBCELLULAR LOCATION: Cell inner membrane {ECO:0000255|HAMAP-Rule:MF_00276}; Single-pass membrane protein {ECO:0000255|HAMAP-Rule:MF_00276}.
Q2NZA0	3.6.3.12		Potassium-transporting ATPase C chain (EC 3.6.3.12) (ATP phosphohydrolase [potassium-transporting] C chain) (Potassium-binding and translocating subunit C) (Potassium-translocating ATPase C chain)	kdpC XOO3622	Xanthomonas oryzae pv. oryzae (strain MAFF 311018)	SUBCELLULAR LOCATION: Cell inner membrane {ECO:0000255|HAMAP-Rule:MF_00276}; Single-pass membrane protein {ECO:0000255|HAMAP-Rule:MF_00276}.
A7IKC3	3.6.3.12		Potassium-transporting ATPase C chain (EC 3.6.3.12) (ATP phosphohydrolase [potassium-transporting] C chain) (Potassium-binding and translocating subunit C) (Potassium-translocating ATPase C chain)	kdpC Xaut_3237	Xanthobacter autotrophicus (strain ATCC BAA-1158 / Py2)	SUBCELLULAR LOCATION: Cell inner membrane {ECO:0000255|HAMAP-Rule:MF_00276}; Single-pass membrane protein {ECO:0000255|HAMAP-Rule:MF_00276}.
A1JQS4	3.6.3.12		Potassium-transporting ATPase C chain (EC 3.6.3.12) (ATP phosphohydrolase [potassium-transporting] C chain) (Potassium-binding and translocating subunit C) (Potassium-translocating ATPase C chain)	kdpC YE2962	Yersinia enterocolitica serotype O:8 / biotype 1B (strain NCTC 13174 / 8081)	SUBCELLULAR LOCATION: Cell inner membrane {ECO:0000255|HAMAP-Rule:MF_00276}; Single-pass membrane protein {ECO:0000255|HAMAP-Rule:MF_00276}.
A7FFQ7	3.6.3.12		Potassium-transporting ATPase C chain (EC 3.6.3.12) (ATP phosphohydrolase [potassium-transporting] C chain) (Potassium-binding and translocating subunit C) (Potassium-translocating ATPase C chain)	kdpC YpsIP31758_1104	Yersinia pseudotuberculosis serotype O:1b (strain IP 31758)	SUBCELLULAR LOCATION: Cell inner membrane {ECO:0000255|HAMAP-Rule:MF_00276}; Single-pass membrane protein {ECO:0000255|HAMAP-Rule:MF_00276}.			A7FFQ7;
Q8ZD98	3.6.3.12		Potassium-transporting ATPase C chain (EC 3.6.3.12) (ATP phosphohydrolase [potassium-transporting] C chain) (Potassium-binding and translocating subunit C) (Potassium-translocating ATPase C chain)	kdpC YPO2690 y1263 YP_2493	Yersinia pestis	SUBCELLULAR LOCATION: Cell inner membrane {ECO:0000255|HAMAP-Rule:MF_00276}; Single-pass membrane protein {ECO:0000255|HAMAP-Rule:MF_00276}.			Q8ZD98;
Q9SK92	6.3.2.-		E3 ubiquitin-protein ligase ATL15 (EC 6.3.2.-) (RING-H2 finger protein ATL15)	ATL15 At1g22500 F12K8.15	Arabidopsis thaliana (Mouse-ear cress)	SUBCELLULAR LOCATION: Membrane {ECO:0000305}; Single-pass membrane protein {ECO:0000305}.			Q9SK92;
Q8L9W3	6.3.2.-		E3 ubiquitin-protein ligase ATL23 (EC 6.3.2.-) (RING-H2 finger protein ATL23)	ATL23 At5g42200 MJC20.31	Arabidopsis thaliana (Mouse-ear cress)	SUBCELLULAR LOCATION: Membrane {ECO:0000305}; Single-pass membrane protein {ECO:0000305}.			Q8L9W3;
Q8LGA5	6.3.2.-		E3 ubiquitin-protein ligase ATL31 (EC 6.3.2.-) (Protein CARBON/NITROGEN INSENSITIVE 1) (Protein SUPER SURVIVAL 1) (RING-H2 finger protein ATL31)	ATL31 CNI1 SSV1 At5g27420 F21A20.130	Arabidopsis thaliana (Mouse-ear cress)	SUBCELLULAR LOCATION: Membrane {ECO:0000269|PubMed:19702666}; Single-pass membrane protein {ECO:0000269|PubMed:19702666}.			Q8LGA5;
Q8H7N9	6.3.2.-		E3 ubiquitin-protein ligase Os03g0188200 (EC 6.3.2.-) (RING-H2 finger protein Os03g0188200)	Os03g0188200 LOC_Os03g08920 OJ1217B09.7	Oryza sativa subsp. japonica (Rice)	SUBCELLULAR LOCATION: Membrane {ECO:0000305}; Single-pass membrane protein {ECO:0000305}.			Q8H7N9;
Q9SLC3	6.3.2.-		E3 ubiquitin-protein ligase ATL41 (EC 6.3.2.-) (RING-H2 finger protein ATL41)	ATL41 At2g42360 MHK10.8	Arabidopsis thaliana (Mouse-ear cress)	SUBCELLULAR LOCATION: Membrane {ECO:0000305}; Single-pass membrane protein {ECO:0000305}.			Q9SLC3;
Q7XLY8	6.3.2.-		E3 ubiquitin-protein ligase Os04g0590900 (EC 6.3.2.-) (RING-H2 finger protein Os04g0590900)	Os04g0590900 LOC_Os04g50100 OsJ_15972 OSJNBa0086O06.21	Oryza sativa subsp. japonica (Rice)	SUBCELLULAR LOCATION: Membrane {ECO:0000305}; Single-pass membrane protein {ECO:0000305}.			Q7XLY8;
Q5XF85	6.3.2.-		E3 ubiquitin-protein ligase ATL42 (EC 6.3.2.-) (RING-H2 finger protein ATL42)	ATL42 At4g28890 F25O24.10	Arabidopsis thaliana (Mouse-ear cress)	SUBCELLULAR LOCATION: Membrane {ECO:0000305}; Single-pass membrane protein {ECO:0000305}.			Q5XF85;
Q9LY41	6.3.2.-		E3 ubiquitin-protein ligase ATL4 (EC 6.3.2.-) (Protein ARABIDOPSIS TOXICOS EN LEVADURA 4) (Protein ATL4) (RING-H2 finger protein ATL4) (RING-H2 finger protein RHX1a)	ATL4 RHX1A At3g60220 F27H5_10	Arabidopsis thaliana (Mouse-ear cress)	SUBCELLULAR LOCATION: Membrane {ECO:0000305}; Single-pass membrane protein {ECO:0000305}.			Q9LY41;
Q9LX93	6.3.2.-		E3 ubiquitin-protein ligase RING1 (EC 6.3.2.-) (RING-H2 finger protein ATL55)	ATL55 RING1 At5g10380 F12B17_270	Arabidopsis thaliana (Mouse-ear cress)	SUBCELLULAR LOCATION: Cell membrane {ECO:0000269|PubMed:18643987}; Single-pass membrane protein {ECO:0000269|PubMed:18643987}.			Q9LX93;
Q9SN27	6.3.2.-		E3 ubiquitin-protein ligase ATL59 (EC 6.3.2.-) (RING-H2 finger protein ATL59)	ATL59 At4g10160 F28M11.80 T9A4.20	Arabidopsis thaliana (Mouse-ear cress)	SUBCELLULAR LOCATION: Membrane {ECO:0000305}; Single-pass membrane protein {ECO:0000305}.			Q9SN27;
Q8RXX9	6.3.2.-		E3 ubiquitin-protein ligase ATL6 (EC 6.3.2.-) (RING-H2 finger protein ATL6)	ATL6 At3g05200 T12H1.17	Arabidopsis thaliana (Mouse-ear cress)	SUBCELLULAR LOCATION: Membrane {ECO:0000305}; Single-pass membrane protein {ECO:0000305}.			Q8RXX9;
Q6NML0	6.3.2.-		E3 ubiquitin-protein ligase ATL76 (EC 6.3.2.-) (RING-H2 finger protein ATL76)	ATL76 At1g49210 F27J15.3	Arabidopsis thaliana (Mouse-ear cress)	SUBCELLULAR LOCATION: Membrane {ECO:0000305}; Single-pass membrane protein {ECO:0000305}.			Q6NML0;
O64763	6.3.2.-		E3 ubiquitin-protein ligase ATL9 (EC 6.3.2.-) (RING-H2 finger protein ATL9)	ATL9 At2g35000 F19I3.23	Arabidopsis thaliana (Mouse-ear cress)	SUBCELLULAR LOCATION: Membrane {ECO:0000305}; Single-pass membrane protein {ECO:0000305}.			O64763;
Q28043	2.7.11.30	BINDING 219 219 ATP. {ECO:0000255|PROSITE-ProRule:PRU00159}.	Activin receptor type-2A (EC 2.7.11.30) (Activin receptor type IIA) (ACTR-IIA)	ACVR2A ACTRII ACVR2	Bos taurus (Bovine)	SUBCELLULAR LOCATION: Membrane; Single-pass type I membrane protein.	COFACTOR: Name=Mg(2+); Xref=ChEBI:CHEBI:18420; Evidence={ECO:0000250}; Name=Mn(2+); Xref=ChEBI:CHEBI:29035; Evidence={ECO:0000250};		Q28043;
Q90669	2.7.11.30	BINDING 219 219 ATP. {ECO:0000255|PROSITE-ProRule:PRU00159}.	Activin receptor type-2A (EC 2.7.11.30) (Activin receptor type IIA) (ACTR-IIA) (ACTRIIA)	ACVR2A	Gallus gallus (Chicken)	SUBCELLULAR LOCATION: Membrane {ECO:0000250}; Single-pass type I membrane protein {ECO:0000250}.	COFACTOR: Name=Mg(2+); Xref=ChEBI:CHEBI:18420; Evidence={ECO:0000250}; Name=Mn(2+); Xref=ChEBI:CHEBI:29035; Evidence={ECO:0000250};		Q90669;
P27037	2.7.11.30	BINDING 219 219 ATP. {ECO:0000255|PROSITE-ProRule:PRU00159}.	Activin receptor type-2A (EC 2.7.11.30) (Activin receptor type IIA) (ACTR-IIA) (ACTRIIA)	ACVR2A ACVR2	Homo sapiens (Human)	SUBCELLULAR LOCATION: Membrane; Single-pass type I membrane protein.	COFACTOR: Name=Mg(2+); Xref=ChEBI:CHEBI:18420; Evidence={ECO:0000250}; Name=Mn(2+); Xref=ChEBI:CHEBI:29035; Evidence={ECO:0000250};		P27037;
P27038	2.7.11.30	BINDING 219 219 ATP. {ECO:0000255|PROSITE-ProRule:PRU00159}.	Activin receptor type-2A (EC 2.7.11.30) (Activin receptor type IIA) (ACTR-IIA)	Acvr2a Acvr2	Mus musculus (Mouse)	SUBCELLULAR LOCATION: Membrane; Single-pass type I membrane protein.	COFACTOR: Name=Mg(2+); Xref=ChEBI:CHEBI:18420; Evidence={ECO:0000250}; Name=Mn(2+); Xref=ChEBI:CHEBI:29035; Evidence={ECO:0000250};		P27038;
P38444	2.7.11.30	BINDING 219 219 ATP. {ECO:0000255|PROSITE-ProRule:PRU00159}.	Activin receptor type-2A (EC 2.7.11.30) (Activin receptor type IIA) (ACTR-IIA)	Acvr2a Actrii Acvr2	Rattus norvegicus (Rat)	SUBCELLULAR LOCATION: Membrane; Single-pass type I membrane protein.	COFACTOR: Name=Mg(2+); Xref=ChEBI:CHEBI:18420; Evidence={ECO:0000250}; Name=Mn(2+); Xref=ChEBI:CHEBI:29035; Evidence={ECO:0000250};		P38444;
Q28560	2.7.11.30	BINDING 219 219 ATP. {ECO:0000255|PROSITE-ProRule:PRU00159}.	Activin receptor type-2A (EC 2.7.11.30) (Activin receptor type IIA) (ACTR-IIA)	ACVR2A ACTRII ACVR2	Ovis aries (Sheep)	SUBCELLULAR LOCATION: Membrane; Single-pass type I membrane protein.	COFACTOR: Name=Mg(2+); Xref=ChEBI:CHEBI:18420; Evidence={ECO:0000250}; Name=Mn(2+); Xref=ChEBI:CHEBI:29035; Evidence={ECO:0000250};		Q28560;
P27039	2.7.11.30	BINDING 220 220 ATP. {ECO:0000255|PROSITE-ProRule:PRU00159}.	Activin receptor type-2A (EC 2.7.11.30) (Activin receptor type IIA) (ACTR-IIA)	acvr2a acvr2	Xenopus laevis (African clawed frog)	SUBCELLULAR LOCATION: Membrane; Single-pass type I membrane protein.			P27039;
Q95126	2.7.11.30	BINDING 217 217 ATP. {ECO:0000255|PROSITE-ProRule:PRU00159}.	Activin receptor type-2B (EC 2.7.11.30) (Activin receptor type IIB) (ACTR-IIB)	ACVR2B	Bos taurus (Bovine)	SUBCELLULAR LOCATION: Cell membrane {ECO:0000250}; Single-pass type I membrane protein {ECO:0000250}.	COFACTOR: Name=Mg(2+); Xref=ChEBI:CHEBI:18420; Evidence={ECO:0000250}; Name=Mn(2+); Xref=ChEBI:CHEBI:29035; Evidence={ECO:0000250};		Q95126;
Q90670	2.7.11.30	BINDING 217 217 ATP. {ECO:0000255|PROSITE-ProRule:PRU00159}.	Activin receptor type-2B (EC 2.7.11.30) (Activin receptor type IIB) (ACTR-IIB)	ACVR2B	Gallus gallus (Chicken)	SUBCELLULAR LOCATION: Membrane {ECO:0000250}; Single-pass type I membrane protein {ECO:0000250}.	COFACTOR: Name=Mg(2+); Xref=ChEBI:CHEBI:18420; Evidence={ECO:0000250}; Name=Mn(2+); Xref=ChEBI:CHEBI:29035; Evidence={ECO:0000250};		Q90670;
Q13705	2.7.11.30	BINDING 217 217 ATP. {ECO:0000255|PROSITE-ProRule:PRU00159}.	Activin receptor type-2B (EC 2.7.11.30) (Activin receptor type IIB) (ACTR-IIB)	ACVR2B	Homo sapiens (Human)	SUBCELLULAR LOCATION: Cell membrane {ECO:0000250}; Single-pass type I membrane protein {ECO:0000250}.	COFACTOR: Name=Mg(2+); Xref=ChEBI:CHEBI:18420; Evidence={ECO:0000250}; Name=Mn(2+); Xref=ChEBI:CHEBI:29035; Evidence={ECO:0000250};		Q13705;
P27040	2.7.11.30	BINDING 241 241 ATP. {ECO:0000255|PROSITE-ProRule:PRU00159}.	Activin receptor type-2B (EC 2.7.11.30) (Activin receptor type IIB) (ACTR-IIB)	Acvr2b	Mus musculus (Mouse)	SUBCELLULAR LOCATION: Cell membrane {ECO:0000250}; Single-pass type I membrane protein {ECO:0000250}.	COFACTOR: Name=Mg(2+); Xref=ChEBI:CHEBI:18420; Evidence={ECO:0000250}; Name=Mn(2+); Xref=ChEBI:CHEBI:29035; Evidence={ECO:0000250};		P27040;
Q66T47	2.7.11.30	BINDING 217 217 ATP. {ECO:0000255|PROSITE-ProRule:PRU00159}.	Activin receptor type-2B (EC 2.7.11.30) (Activin receptor type IIB) (ACTR-IIB)	ACVR2B	Sus scrofa (Pig)	SUBCELLULAR LOCATION: Cell membrane {ECO:0000250}; Single-pass type I membrane protein {ECO:0000250}.	COFACTOR: Name=Mg(2+); Xref=ChEBI:CHEBI:18420; Evidence={ECO:0000250}; Name=Mn(2+); Xref=ChEBI:CHEBI:29035; Evidence={ECO:0000250};		Q66T47;
P38445	2.7.11.30	BINDING 217 217 ATP. {ECO:0000255|PROSITE-ProRule:PRU00159}.	Activin receptor type-2B (EC 2.7.11.30) (Activin receptor type IIB) (ACTR-IIB)	Acvr2b Actriib	Rattus norvegicus (Rat)	SUBCELLULAR LOCATION: Cell membrane {ECO:0000250}; Single-pass type I membrane protein {ECO:0000250}.	COFACTOR: Name=Mg(2+); Xref=ChEBI:CHEBI:18420; Evidence={ECO:0000250}; Name=Mn(2+); Xref=ChEBI:CHEBI:29035; Evidence={ECO:0000250};		P38445;
P27041	2.7.11.30	BINDING 216 216 ATP. {ECO:0000255|PROSITE-ProRule:PRU00159}.	Activin receptor type-2B (EC 2.7.11.30) (Activin receptor type IIB) (ACTR-IIB)	acvr2b	Xenopus laevis (African clawed frog)	SUBCELLULAR LOCATION: Membrane; Single-pass type I membrane protein.			P27041;
O81906	2.7.11.1	BINDING 557 557 ATP. {ECO:0000255|PROSITE-ProRule:PRU00159}.	G-type lectin S-receptor-like serine/threonine-protein kinase B120 (EC 2.7.11.1)	B120 At4g21390 F18E5.10 T6K22.120	Arabidopsis thaliana (Mouse-ear cress)	SUBCELLULAR LOCATION: Cell membrane {ECO:0000250}; Single-pass type I membrane protein {ECO:0000250}.			O81906;
Q9VTG7	2.4.1.135		Galactosylgalactosylxylosylprotein 3-beta-glucuronosyltransferase P (EC 2.4.1.135) (Beta-1,3-glucuronyltransferase P) (Glucuronosyltransferase P) (GlcAT-P) (UDP-glucuronosyltransferase P) (DmGlcAT-BSII)	GlcAT-P GLCAT-BSII CG6207	Drosophila melanogaster (Fruit fly)	SUBCELLULAR LOCATION: Golgi apparatus membrane {ECO:0000305}; Single-pass type II membrane protein {ECO:0000305}.	COFACTOR: Name=Mn(2+); Xref=ChEBI:CHEBI:29035; Evidence={ECO:0000269|PubMed:12511570};	METAL 335 335 Manganese. {ECO:0000250}.	Q9VTG7;
Q9VLA1	2.4.1.135		Galactosylgalactosylxylosylprotein 3-beta-glucuronosyltransferase S (EC 2.4.1.135) (Beta-1,3-glucuronyltransferase S) (Glucuronosyltransferase S) (GlcAT-S) (UDP-glucuronosyltransferase S) (DmGlcAT-BSI)	GlcAT-S GLCAT-BSI CG3881	Drosophila melanogaster (Fruit fly)	SUBCELLULAR LOCATION: Golgi apparatus membrane {ECO:0000305}; Single-pass type II membrane protein {ECO:0000305}.	COFACTOR: Name=Mn(2+); Xref=ChEBI:CHEBI:29035; Evidence={ECO:0000269|PubMed:12511570};	METAL 235 235 Manganese. {ECO:0000250}.	Q9VLA1;
Q7T3S5	2.4.1.206		Lactosylceramide 1,3-N-acetyl-beta-D-glucosaminyltransferase A (EC 2.4.1.206) (Lactotriaosylceramide synthase A) (Lc(3)Cer synthase A) (Lc3 synthase A) (UDP-GlcNAc:beta-Gal beta-1,3-N-acetylglucosaminyltransferase 5A) (BGnT-5A) (Beta-1,3-Gn-T5A) (Beta-1,3-N-acetylglucosaminyltransferase 5A) (Beta3Gn-T5A)	b3gnt5a b3gnt5	Danio rerio (Zebrafish) (Brachydanio rerio)	SUBCELLULAR LOCATION: Golgi apparatus membrane {ECO:0000250}; Single-pass type II membrane protein {ECO:0000250}.			Q7T3S5;
Q5HZL5	2.4.1.206		Lactosylceramide 1,3-N-acetyl-beta-D-glucosaminyltransferase A (EC 2.4.1.206) (Lactotriaosylceramide synthase A) (Lc(3)Cer synthase A) (Lc3 synthase A) (UDP-GlcNAc:beta-Gal beta-1,3-N-acetylglucosaminyltransferase 5A) (BGnT-5A) (Beta-1,3-Gn-T5A) (Beta-1,3-N-acetylglucosaminyltransferase 5A) (Beta3Gn-T5A)	b3gnt5-a	Xenopus laevis (African clawed frog)	SUBCELLULAR LOCATION: Golgi apparatus membrane {ECO:0000250}; Single-pass type II membrane protein {ECO:0000250}.			Q5HZL5;
Q5XJP0	2.4.1.206		Lactosylceramide 1,3-N-acetyl-beta-D-glucosaminyltransferase B (EC 2.4.1.206) (Lactotriaosylceramide synthase B) (Lc(3)Cer synthase B) (Lc3 synthase B) (UDP-GlcNAc:beta-Gal beta-1,3-N-acetylglucosaminyltransferase 5B) (BGnT-5B) (Beta-1,3-Gn-T5B) (Beta-1,3-N-acetylglucosaminyltransferase 5B) (Beta3Gn-T5B)	b3gnt5b zgc:101733	Danio rerio (Zebrafish) (Brachydanio rerio)	SUBCELLULAR LOCATION: Golgi apparatus membrane {ECO:0000250}; Single-pass type II membrane protein {ECO:0000250}.			Q5XJP0;
Q6DE15	2.4.1.206		Lactosylceramide 1,3-N-acetyl-beta-D-glucosaminyltransferase B (EC 2.4.1.206) (Lactotriaosylceramide synthase B) (Lc(3)Cer synthase B) (Lc3 synthase B) (UDP-GlcNAc:beta-Gal beta-1,3-N-acetylglucosaminyltransferase 5B) (BGnT-5B) (Beta-1,3-Gn-T5B) (Beta-1,3-N-acetylglucosaminyltransferase 5B) (Beta3Gn-T5B)	b3gnt5-b	Xenopus laevis (African clawed frog)	SUBCELLULAR LOCATION: Golgi apparatus membrane {ECO:0000250}; Single-pass type II membrane protein {ECO:0000250}.			Q6DE15;
Q5CB03	2.4.1.135	BINDING 123 123 UDP-glucuronate. {ECO:0000250}.; BINDING 166 166 UDP-glucuronate. {ECO:0000250}.; BINDING 171 171 UDP-glucuronate. {ECO:0000250}.	Galactosylgalactosylxylosylprotein 3-beta-glucuronosyltransferase 1 (EC 2.4.1.135) (Beta-1,3-glucuronyltransferase 1) (Glucuronosyltransferase P) (GlcAT-P) (UDP-GlcUA:glycoprotein beta-1,3-glucuronyltransferase) (GlcUAT-P)	B3GAT1	Canis familiaris (Dog) (Canis lupus familiaris)	SUBCELLULAR LOCATION: Golgi apparatus membrane {ECO:0000250}; Single-pass type II membrane protein {ECO:0000250}.	COFACTOR: Name=Mn(2+); Xref=ChEBI:CHEBI:29035; Evidence={ECO:0000250};	METAL 198 198 Manganese. {ECO:0000250}.	Q5CB03;
Q9P2W7	2.4.1.135	BINDING 122 122 UDP-glucuronate.; BINDING 165 165 UDP-glucuronate.; BINDING 170 170 UDP-glucuronate. {ECO:0000250}.	Galactosylgalactosylxylosylprotein 3-beta-glucuronosyltransferase 1 (EC 2.4.1.135) (Beta-1,3-glucuronyltransferase 1) (Glucuronosyltransferase P) (GlcAT-P) (UDP-GlcUA:glycoprotein beta-1,3-glucuronyltransferase) (GlcUAT-P)	B3GAT1 GLCATP	Homo sapiens (Human)	SUBCELLULAR LOCATION: Golgi apparatus membrane; Single-pass type II membrane protein.	COFACTOR: Name=Mn(2+); Xref=ChEBI:CHEBI:29035;	METAL 197 197 Manganese. {ECO:0000250}.	Q9P2W7;
Q9CW73	2.4.1.135	BINDING 122 122 UDP-glucuronate. {ECO:0000250}.; BINDING 165 165 UDP-glucuronate. {ECO:0000250}.; BINDING 170 170 UDP-glucuronate. {ECO:0000250}.	Galactosylgalactosylxylosylprotein 3-beta-glucuronosyltransferase 1 (EC 2.4.1.135) (Beta-1,3-glucuronyltransferase 1) (Glucuronosyltransferase P) (GlcAT-P) (UDP-GlcUA:glycoprotein beta-1,3-glucuronyltransferase) (GlcUAT-P)	B3gat1	Mus musculus (Mouse)	SUBCELLULAR LOCATION: Golgi apparatus membrane {ECO:0000250}; Single-pass type II membrane protein {ECO:0000250}.	COFACTOR: Name=Mn(2+); Xref=ChEBI:CHEBI:29035; Evidence={ECO:0000250};	METAL 197 197 Manganese. {ECO:0000250}.	Q9CW73;
Q5CB04	2.4.1.135	BINDING 122 122 UDP-glucuronate. {ECO:0000250}.; BINDING 165 165 UDP-glucuronate. {ECO:0000250}.; BINDING 170 170 UDP-glucuronate. {ECO:0000250}.	Galactosylgalactosylxylosylprotein 3-beta-glucuronosyltransferase 1 (EC 2.4.1.135) (Beta-1,3-glucuronyltransferase 1) (Glucuronosyltransferase P) (GlcAT-P) (UDP-GlcUA:glycoprotein beta-1,3-glucuronyltransferase) (GlcUAT-P)	B3GAT1	Pan troglodytes (Chimpanzee)	SUBCELLULAR LOCATION: Golgi apparatus membrane {ECO:0000250}; Single-pass type II membrane protein {ECO:0000250}.	COFACTOR: Name=Mn(2+); Xref=ChEBI:CHEBI:29035; Evidence={ECO:0000250};	METAL 197 197 Manganese. {ECO:0000250}.	Q5CB04;
O35789	2.4.1.135	BINDING 122 122 UDP-glucuronate. {ECO:0000250}.; BINDING 165 165 UDP-glucuronate. {ECO:0000250}.; BINDING 170 170 UDP-glucuronate. {ECO:0000250}.	Galactosylgalactosylxylosylprotein 3-beta-glucuronosyltransferase 1 (EC 2.4.1.135) (Beta-1,3-glucuronyltransferase 1) (Glucuronosyltransferase P) (GlcAT-P) (UDP-GlcUA:glycoprotein beta-1,3-glucuronyltransferase) (GlcUAT-P)	B3gat1	Rattus norvegicus (Rat)	SUBCELLULAR LOCATION: Golgi apparatus membrane; Single-pass type II membrane protein.	COFACTOR: Name=Mn(2+); Xref=ChEBI:CHEBI:29035;	METAL 197 197 Manganese. {ECO:0000250}.	O35789;
Q5CAZ6	2.4.1.135	BINDING 124 124 UDP-glucuronate. {ECO:0000250}.; BINDING 161 161 UDP-glucuronate. {ECO:0000250}.; BINDING 166 166 UDP-glucuronate. {ECO:0000250}.	Galactosylgalactosylxylosylprotein 3-beta-glucuronosyltransferase 2 (EC 2.4.1.135) (Beta-1,3-glucuronyltransferase 2) (GlcAT-D) (UDP-glucuronosyltransferase S) (GlcAT-S) (Glucuronosyltransferase S)	B3GAT2	Canis familiaris (Dog) (Canis lupus familiaris)	SUBCELLULAR LOCATION: Golgi apparatus membrane {ECO:0000250}; Single-pass type II membrane protein {ECO:0000250}.	COFACTOR: Name=Mn(2+); Xref=ChEBI:CHEBI:29035; Evidence={ECO:0000250};	METAL 193 193 Manganese. {ECO:0000250}.	Q5CAZ6;
Q9NPZ5	2.4.1.135	BINDING 118 118 UDP-glucuronate. {ECO:0000250}.; BINDING 155 155 UDP-glucuronate. {ECO:0000250}.; BINDING 160 160 UDP-glucuronate. {ECO:0000250}.	Galactosylgalactosylxylosylprotein 3-beta-glucuronosyltransferase 2 (EC 2.4.1.135) (Beta-1,3-glucuronyltransferase 2) (GlcAT-D) (UDP-glucuronosyltransferase S) (GlcAT-S) (Glucuronosyltransferase S)	B3GAT2 GLCATS KIAA1963	Homo sapiens (Human)	SUBCELLULAR LOCATION: Golgi apparatus membrane; Single-pass type II membrane protein.	COFACTOR: Name=Mn(2+); Xref=ChEBI:CHEBI:29035;	METAL 187 187 Manganese. {ECO:0000250}.	Q9NPZ5;
P59270	2.4.1.135	BINDING 119 119 UDP-glucuronate. {ECO:0000250}.; BINDING 156 156 UDP-glucuronate. {ECO:0000250}.; BINDING 161 161 UDP-glucuronate. {ECO:0000250}.	Galactosylgalactosylxylosylprotein 3-beta-glucuronosyltransferase 2 (EC 2.4.1.135) (Beta-1,3-glucuronyltransferase 2) (GlcAT-D) (UDP-glucuronosyltransferase S) (GlcAT-S) (Glucuronosyltransferase S)	B3gat2 Glcats	Mus musculus (Mouse)	SUBCELLULAR LOCATION: Golgi apparatus membrane {ECO:0000250}; Single-pass type II membrane protein {ECO:0000250}.	COFACTOR: Name=Mn(2+); Xref=ChEBI:CHEBI:29035;	METAL 188 188 Manganese. {ECO:0000250}.	P59270;
Q9Z137	2.4.1.135		Galactosylgalactosylxylosylprotein 3-beta-glucuronosyltransferase 2 (EC 2.4.1.135) (Beta-1,3-glucuronyltransferase 2) (GlcAT-D) (UDP-glucuronosyltransferase S) (GlcAT-S) (Glucuronosyltransferase S)	B3gat2 Glcats	Rattus norvegicus (Rat)	SUBCELLULAR LOCATION: Golgi apparatus membrane; Single-pass type II membrane protein.	COFACTOR: Name=Mn(2+); Xref=ChEBI:CHEBI:29035;	METAL 188 188 Manganese. {ECO:0000250}.	Q9Z137;
Q9WU47	2.4.1.135		Galactosylgalactosylxylosylprotein 3-beta-glucuronosyltransferase 3 (EC 2.4.1.135) (Beta-1,3-glucuronyltransferase 3) (Glucuronosyltransferase I) (GlcAT-I) (UDP-GlcUA:Gal beta-1,3-Gal-R glucuronyltransferase) (GlcUAT-I)	B3GAT3	Cricetulus griseus (Chinese hamster) (Cricetulus barabensis griseus)	SUBCELLULAR LOCATION: Golgi apparatus membrane; Single-pass type II membrane protein.	COFACTOR: Name=Mn(2+); Xref=ChEBI:CHEBI:29035;	METAL 196 196 Manganese. {ECO:0000250}.	Q9WU47;
O94766	2.4.1.135	BINDING 113 113 UDP-glucuronate.; BINDING 156 156 UDP-glucuronate.; BINDING 161 161 UDP-glucuronate.	Galactosylgalactosylxylosylprotein 3-beta-glucuronosyltransferase 3 (EC 2.4.1.135) (Beta-1,3-glucuronyltransferase 3) (Glucuronosyltransferase I) (GlcAT-I) (UDP-GlcUA:Gal beta-1,3-Gal-R glucuronyltransferase) (GlcUAT-I)	B3GAT3	Homo sapiens (Human)	SUBCELLULAR LOCATION: Golgi apparatus membrane {ECO:0000269|PubMed:21763480}; Single-pass type II membrane protein {ECO:0000269|PubMed:21763480}. Golgi apparatus, cis-Golgi network {ECO:0000269|PubMed:21763480}.	COFACTOR: Name=Mn(2+); Xref=ChEBI:CHEBI:29035;	METAL 196 196 Manganese.	O94766;
P58158	2.4.1.135	BINDING 113 113 UDP-glucuronate. {ECO:0000250}.; BINDING 156 156 UDP-glucuronate. {ECO:0000250}.; BINDING 161 161 UDP-glucuronate. {ECO:0000250}.	Galactosylgalactosylxylosylprotein 3-beta-glucuronosyltransferase 3 (EC 2.4.1.135) (Beta-1,3-glucuronyltransferase 3) (Glucuronosyltransferase I) (GlcAT-I) (UDP-GlcUA:Gal beta-1,3-Gal-R glucuronyltransferase) (GlcUAT-I)	B3gat3	Mus musculus (Mouse)	SUBCELLULAR LOCATION: Golgi apparatus membrane {ECO:0000250}; Single-pass type II membrane protein {ECO:0000250}.	COFACTOR: Name=Mn(2+); Xref=ChEBI:CHEBI:29035; Evidence={ECO:0000250};	METAL 196 196 Manganese. {ECO:0000250}.	P58158;
O97422	2.4.1.135		Galactosylgalactosylxylosylprotein 3-beta-glucuronosyltransferase I (EC 2.4.1.135) (Beta-1,3-glucuronyltransferase I) (Glucuronosyltransferase I) (DmGlcAT-I) (UDP-GlcUA:Gal beta-1,3-Gal-R glucuronyltransferase) (GlcUAT-I)	GlcAT-I CG32775	Drosophila melanogaster (Fruit fly)	SUBCELLULAR LOCATION: Golgi apparatus membrane {ECO:0000305}; Single-pass type II membrane protein {ECO:0000305}.	COFACTOR: Name=Mn(2+); Xref=ChEBI:CHEBI:29035; Evidence={ECO:0000269|PubMed:12511570};	METAL 163 163 Manganese. {ECO:0000250}.	O97422;
O75752	2.4.1.79		UDP-GalNAc:beta-1,3-N-acetylgalactosaminyltransferase 1 (Beta-1,3-GalNAc-T1) (EC 2.4.1.79) (Beta-1,3-galactosyltransferase 3) (Beta-1,3-GalTase 3) (Beta3Gal-T3) (Beta3GalT3) (b3Gal-T3) (Beta-3-Gx-T3) (Galactosylgalactosylglucosylceramide beta-D-acetyl-galactosaminyltransferase) (Globoside synthase) (UDP-N-acetylgalactosamine:globotriaosylceramide beta-1,3-N-acetylgalactosaminyltransferase)	B3GALNT1 B3GALT3 UNQ531/PRO1074	Homo sapiens (Human)	SUBCELLULAR LOCATION: Golgi apparatus membrane; Single-pass type II membrane protein.	COFACTOR: Name=Mg(2+); Xref=ChEBI:CHEBI:18420; Evidence={ECO:0000269|PubMed:10993897, ECO:0000269|PubMed:9582303};		O75752;
Q920V1	2.4.1.79		UDP-GalNAc:beta-1,3-N-acetylgalactosaminyltransferase 1 (Beta-1,3-GalNAc-T1) (EC 2.4.1.79) (Beta-1,3-galactosyltransferase 3) (Beta-1,3-GalTase 3) (Beta3Gal-T3) (Beta3GalT3) (b3Gal-T3) (Beta-3-Gx-T3) (Galactosylgalactosylglucosylceramide beta-D-acetyl-galactosaminyltransferase) (Globoside synthase) (UDP-N-acetylgalactosamine:globotriaosylceramide beta-1,3-N-acetylgalactosaminyltransferase)	B3galnt1 B3galt3 B3gt3	Mus musculus (Mouse)	SUBCELLULAR LOCATION: Golgi apparatus membrane {ECO:0000250}; Single-pass type II membrane protein {ECO:0000250}.	COFACTOR: Name=Mg(2+); Xref=ChEBI:CHEBI:18420;		Q920V1;
Q793U7	2.4.1.79		UDP-GalNAc:beta-1,3-N-acetylgalactosaminyltransferase 1 (Beta-1,3-GalNAc-T1) (EC 2.4.1.79) (Beta-1,3-galactosyltransferase 3) (Beta-1,3-GalTase 3) (Beta3Gal-T3) (Beta3GalT3) (b3Gal-T3) (Beta-3-Gx-T3) (Galactosylgalactosylglucosylceramide beta-D-acetyl-galactosaminyltransferase) (Globoside synthase) (UDP-N-acetylgalactosamine:globotriaosylceramide beta-1,3-N-acetylgalactosaminyltransferase)	B3galnt1 B3galt3 B3gt3	Mus spicilegus (Steppe mouse)	SUBCELLULAR LOCATION: Golgi apparatus membrane {ECO:0000250}; Single-pass type II membrane protein {ECO:0000250}.	COFACTOR: Name=Mg(2+); Xref=ChEBI:CHEBI:18420; Evidence={ECO:0000250};		Q793U7;
Q864U6	2.4.1.79		UDP-GalNAc:beta-1,3-N-acetylgalactosaminyltransferase 1 (Beta-1,3-GalNAc-T1) (EC 2.4.1.79) (Beta-1,3-galactosyltransferase 3) (Beta-1,3-GalTase 3) (Beta3Gal-T3) (Beta3GalT3) (b3Gal-T3) (Beta-3-Gx-T3) (Galactosylgalactosylglucosylceramide beta-D-acetyl-galactosaminyltransferase) (Globoside synthase) (UDP-N-acetylgalactosamine:globotriaosylceramide beta-1,3-N-acetylgalactosaminyltransferase)	B3GALNT1 B3GALT3	Sus scrofa (Pig)	SUBCELLULAR LOCATION: Golgi apparatus membrane {ECO:0000250}; Single-pass type II membrane protein {ECO:0000250}.	COFACTOR: Name=Mg(2+); Xref=ChEBI:CHEBI:18420; Evidence={ECO:0000250};		Q864U6;
Q5RAL7	2.4.1.79		UDP-GalNAc:beta-1,3-N-acetylgalactosaminyltransferase 1 (Beta-1,3-GalNAc-T1) (EC 2.4.1.79) (Beta-1,3-galactosyltransferase 3) (Beta-1,3-GalTase 3) (Beta3Gal-T3) (Beta3GalT3) (b3Gal-T3) (Beta-3-Gx-T3) (Galactosylgalactosylglucosylceramide beta-D-acetyl-galactosaminyltransferase) (Globoside synthase) (UDP-N-acetylgalactosamine:globotriaosylceramide beta-1,3-N-acetylgalactosaminyltransferase)	B3GALNT1 B3GALT3	Pongo abelii (Sumatran orangutan) (Pongo pygmaeus abelii)	SUBCELLULAR LOCATION: Golgi apparatus membrane {ECO:0000250}; Single-pass type II membrane protein {ECO:0000250}.	COFACTOR: Name=Mg(2+); Xref=ChEBI:CHEBI:18420; Evidence={ECO:0000250};		Q5RAL7;
Q6AY39	2.4.1.79		UDP-GalNAc:beta-1,3-N-acetylgalactosaminyltransferase 1 (Beta-1,3-GalNAc-T1) (EC 2.4.1.79) (Beta-1,3-galactosyltransferase 3) (Beta-1,3-GalTase 3) (Beta3Gal-T3) (Beta3GalT3) (b3Gal-T3) (Beta-3-Gx-T3) (Galactosylgalactosylglucosylceramide beta-D-acetyl-galactosaminyltransferase) (Globoside synthase) (UDP-N-acetylgalactosamine:globotriaosylceramide beta-1,3-N-acetylgalactosaminyltransferase)	B3galnt1 B3galt3	Rattus norvegicus (Rat)	SUBCELLULAR LOCATION: Golgi apparatus membrane {ECO:0000250}; Single-pass type II membrane protein {ECO:0000250}.	COFACTOR: Name=Mg(2+); Xref=ChEBI:CHEBI:18420; Evidence={ECO:0000250};		Q6AY39;
Q502B3	2.4.1.-		UDP-GalNAc:beta-1,3-N-acetylgalactosaminyltransferase 2 (Beta-1,3-GalNAc-T2) (EC 2.4.1.-) (Beta-1,3-N-acetylgalactosaminyltransferase II)	b3galnt2 zgc:112351	Danio rerio (Zebrafish) (Brachydanio rerio)	SUBCELLULAR LOCATION: Golgi apparatus membrane {ECO:0000250}; Single-pass type II membrane protein {ECO:0000250}. Endoplasmic reticulum {ECO:0000250}.
Q8NCR0	2.4.1.-		UDP-GalNAc:beta-1,3-N-acetylgalactosaminyltransferase 2 (Beta-1,3-GalNAc-T2) (EC 2.4.1.-) (Beta-1,3-N-acetylgalactosaminyltransferase II)	B3GALNT2	Homo sapiens (Human)	SUBCELLULAR LOCATION: Golgi apparatus membrane {ECO:0000250}; Single-pass type II membrane protein {ECO:0000250}. Endoplasmic reticulum {ECO:0000269|PubMed:23453667}.			Q8NCR0;
Q8BG28	2.4.1.-		UDP-GalNAc:beta-1,3-N-acetylgalactosaminyltransferase 2 (Beta-1,3-GalNAc-T2) (EC 2.4.1.-) (Beta-1,3-N-acetylgalactosaminyltransferase II)	B3galnt2	Mus musculus (Mouse)	SUBCELLULAR LOCATION: Golgi apparatus membrane {ECO:0000250}; Single-pass type II membrane protein {ECO:0000250}. Endoplasmic reticulum {ECO:0000250}.			Q8BG28;
Q6NRQ1	2.4.1.-		UDP-GalNAc:beta-1,3-N-acetylgalactosaminyltransferase 2 (Beta-1,3-GalNAc-T2) (EC 2.4.1.-) (Beta-1,3-N-acetylgalactosaminyltransferase II)	b3galnt2	Xenopus laevis (African clawed frog)	SUBCELLULAR LOCATION: Golgi apparatus membrane {ECO:0000250}; Single-pass type II membrane protein {ECO:0000250}. Endoplasmic reticulum {ECO:0000250}.			Q6NRQ1;
Q5M900	2.4.1.-		UDP-GalNAc:beta-1,3-N-acetylgalactosaminyltransferase 2 (Beta-1,3-GalNAc-T2) (EC 2.4.1.-) (Beta-1,3-N-acetylgalactosaminyltransferase II)	b3galnt2	Xenopus tropicalis (Western clawed frog) (Silurana tropicalis)	SUBCELLULAR LOCATION: Golgi apparatus membrane {ECO:0000250}; Single-pass type II membrane protein {ECO:0000250}. Endoplasmic reticulum {ECO:0000250}.
Q6Y288	2.4.1.-		Beta-1,3-glucosyltransferase (Beta3Glc-T) (EC 2.4.1.-) (Beta-3-glycosyltransferase-like)	B3GALTL B3GTL	Homo sapiens (Human)	SUBCELLULAR LOCATION: Endoplasmic reticulum membrane {ECO:0000255|PROSITE-ProRule:PRU10138, ECO:0000269|PubMed:16899492}; Single-pass type II membrane protein {ECO:0000269|PubMed:16899492}.			Q6Y288;
Q8BHT6	2.4.1.-		Beta-1,3-glucosyltransferase (Beta3Glc-T) (EC 2.4.1.-) (Beta-3-glycosyltransferase-like)	B3galtl Gm1057	Mus musculus (Mouse)	SUBCELLULAR LOCATION: Endoplasmic reticulum membrane {ECO:0000255|PROSITE-ProRule:PRU10138}; Single-pass type II membrane protein {ECO:0000250}.			Q8BHT6;
Q9NY97	2.4.1.149		N-acetyllactosaminide beta-1,3-N-acetylglucosaminyltransferase 2 (EC 2.4.1.149) (Beta-1,3-N-acetylglucosaminyltransferase 1) (BGnT-1) (Beta-1,3-Gn-T1) (Beta3Gn-T1) (Beta-1,3-galactosyltransferase 7) (Beta-1,3-GalTase 7) (Beta3Gal-T7) (Beta3GalT7) (b3Gal-T7) (Beta-3-Gx-T7) (UDP-Gal:beta-GlcNAc beta-1,3-galactosyltransferase 7) (UDP-GlcNAc:betaGal beta-1,3-N-acetylglucosaminyltransferase 2) (BGnT-2…	B3GNT2 B3GALT7 B3GNT1	Homo sapiens (Human)	SUBCELLULAR LOCATION: Golgi apparatus membrane {ECO:0000305}; Single-pass type II membrane protein {ECO:0000305}.	COFACTOR: Name=Mn(2+); Xref=ChEBI:CHEBI:29035; Evidence={ECO:0000269|PubMed:9892646};		Q9NY97;
Q9Z222	2.4.1.149		N-acetyllactosaminide beta-1,3-N-acetylglucosaminyltransferase 2 (EC 2.4.1.149) (Beta-1,3-N-acetylglucosaminyltransferase 1) (BGnT-1) (Beta-1,3-Gn-T1) (Beta3Gn-T1) (Beta-1,3-galactosyltransferase 7) (Beta-1,3-GalTase 7) (Beta3Gal-T7) (Beta3GalT7) (b3Gal-T7) (Beta-3-Gx-T7) (UDP-Gal:beta-GlcNAc beta-1,3-galactosyltransferase 7) (UDP-GlcNAc:betaGal beta-1,3-N-acetylglucosaminyltransferase 2) (BGnT-2…	B3GNT2 B3gnt1 Beta3gnt	Mus musculus (Mouse)	SUBCELLULAR LOCATION: Golgi apparatus membrane {ECO:0000305}; Single-pass type II membrane protein {ECO:0000305}.	COFACTOR: Name=Mn(2+); Xref=ChEBI:CHEBI:29035; Evidence={ECO:0000269|PubMed:9892646};		Q9Z222;
Q9Y2A9	2.4.1.149; 2.4.1.146		N-acetyllactosaminide beta-1,3-N-acetylglucosaminyltransferase 3 (EC 2.4.1.149) (Beta-1,3-galactosyl-O-glycosyl-glycoprotein beta-1,3-N-acetylglucosaminyltransferase) (EC 2.4.1.146) (Beta-1,3-galactosyltransferase 8) (Beta-1,3-GalTase 8) (Beta3Gal-T8) (Beta3GalT8) (b3Gal-T8) (Beta-3-Gx-T8) (Core 1 extending beta-1,3-N-acetylglucosaminyltransferase) (Core1-beta3GlcNAcT) (Transmembrane protein 3) (…	B3GNT3 B3GALT8 TMEM3 UNQ637/PRO1266	Homo sapiens (Human)	SUBCELLULAR LOCATION: Golgi apparatus membrane {ECO:0000305}; Single-pass type II membrane protein {ECO:0000305}.			Q9Y2A9;
Q5JCS9	2.4.1.149; 2.4.1.146		N-acetyllactosaminide beta-1,3-N-acetylglucosaminyltransferase 3 (EC 2.4.1.149) (Core 1 extending beta-1,3-N-acetylglucosaminyltransferase) (EC 2.4.1.146) (Core1-beta3GlcNAcT) (UDP-GlcNAc:betaGal beta-1,3-N-acetylglucosaminyltransferase 3) (BGnT-3) (Beta-1,3-Gn-T3) (Beta-1,3-N-acetylglucosaminyltransferase 3) (Beta3Gn-T3)	B3gnt3	Mus musculus (Mouse)	SUBCELLULAR LOCATION: Golgi apparatus membrane {ECO:0000305}; Single-pass type II membrane protein {ECO:0000305}.			Q5JCS9;
Q9C0J1	2.4.1.149		N-acetyllactosaminide beta-1,3-N-acetylglucosaminyltransferase 4 (EC 2.4.1.149) (UDP-GlcNAc:betaGal beta-1,3-N-acetylglucosaminyltransferase 4) (BGnT-4) (Beta-1,3-Gn-T4) (Beta-1,3-N-acetylglucosaminyltransferase 4) (Beta3Gn-T4)	B3GNT4 UNQ1898/PRO4344	Homo sapiens (Human)	SUBCELLULAR LOCATION: Golgi apparatus membrane {ECO:0000250}; Single-pass type II membrane protein {ECO:0000250}.			Q9C0J1;
Q1RLK6	2.4.1.149; 2.4.1.-		N-acetyllactosaminide beta-1,3-N-acetylglucosaminyltransferase 4 (EC 2.4.1.149) (UDP-GlcNAc:betaGal beta-1,3-N-acetylglucosaminyltransferase 4) (BGnT-4) (Beta-1,3-Gn-T4) (Beta-1,3-N-acetylglucosaminyltransferase 4) (Beta3Gn-T4) (EC 2.4.1.-)	B3gnt4	Mus musculus (Mouse)	SUBCELLULAR LOCATION: Golgi apparatus membrane {ECO:0000250}; Single-pass type II membrane protein {ECO:0000250}.			Q1RLK6;
Q9BYG0	2.4.1.206		Lactosylceramide 1,3-N-acetyl-beta-D-glucosaminyltransferase (EC 2.4.1.206) (Lactotriaosylceramide synthase) (Lc(3)Cer synthase) (Lc3 synthase) (UDP-GlcNAc:beta-Gal beta-1,3-N-acetylglucosaminyltransferase 5) (BGnT-5) (Beta-1,3-Gn-T5) (Beta-1,3-N-acetylglucosaminyltransferase 5) (Beta3Gn-T5)	B3GNT5	Homo sapiens (Human)	SUBCELLULAR LOCATION: Golgi apparatus membrane {ECO:0000250}; Single-pass type II membrane protein {ECO:0000250}.			Q9BYG0;
Q8BGY6	2.4.1.206		Lactosylceramide 1,3-N-acetyl-beta-D-glucosaminyltransferase (EC 2.4.1.206) (Lactotriaosylceramide synthase) (Lc(3)Cer synthase) (Lc3 synthase) (UDP-GlcNAc:beta-Gal beta-1,3-N-acetylglucosaminyltransferase 5) (BGnT-5) (Beta-1,3-Gn-T5) (Beta-1,3-N-acetylglucosaminyltransferase 5) (Beta3Gn-T5)	B3gnt5	Mus musculus (Mouse)	SUBCELLULAR LOCATION: Golgi apparatus membrane {ECO:0000250}; Single-pass type II membrane protein {ECO:0000250}.			Q8BGY6;
Q864U8	2.4.1.206		Lactosylceramide 1,3-N-acetyl-beta-D-glucosaminyltransferase (EC 2.4.1.206) (Lactotriaosylceramide synthase) (Lc(3)Cer synthase) (Lc3 synthase) (UDP-GlcNAc:beta-Gal beta-1,3-N-acetylglucosaminyltransferase 5) (BGnT-5) (Beta-1,3-Gn-T5) (Beta-1,3-N-acetylglucosaminyltransferase 5) (Beta3Gn-T5)	B3GNT5	Sus scrofa (Pig)	SUBCELLULAR LOCATION: Golgi apparatus membrane {ECO:0000250}; Single-pass type II membrane protein {ECO:0000250}.
Q99NB2	2.4.1.206		Lactosylceramide 1,3-N-acetyl-beta-D-glucosaminyltransferase (EC 2.4.1.206) (Lactotriaosylceramide synthase) (Lc(3)Cer synthase) (Lc3 synthase) (UDP-GlcNAc:beta-Gal beta-1,3-N-acetylglucosaminyltransferase 5) (BGnT-5) (Beta-1,3-Gn-T5) (Beta-1,3-N-acetylglucosaminyltransferase 5) (Beta3Gn-T5)	B3gnt5	Rattus norvegicus (Rat)	SUBCELLULAR LOCATION: Golgi apparatus membrane {ECO:0000250}; Single-pass type II membrane protein {ECO:0000250}.			Q99NB2;
Q6P3P5	2.4.1.206		Lactosylceramide 1,3-N-acetyl-beta-D-glucosaminyltransferase (EC 2.4.1.206) (Lactotriaosylceramide synthase) (Lc(3)Cer synthase) (Lc3 synthase) (UDP-GlcNAc:beta-Gal beta-1,3-N-acetylglucosaminyltransferase 5) (BGnT-5) (Beta-1,3-Gn-T5) (Beta-1,3-N-acetylglucosaminyltransferase 5) (Beta3Gn-T5)	b3gnt5 TEgg092f15.1	Xenopus tropicalis (Western clawed frog) (Silurana tropicalis)	SUBCELLULAR LOCATION: Golgi apparatus membrane {ECO:0000250}; Single-pass type II membrane protein {ECO:0000250}.			Q6P3P5;
Q6ZMB0	2.4.1.-		UDP-GlcNAc:betaGal beta-1,3-N-acetylglucosaminyltransferase 6 (BGnT-6) (Beta-1,3-Gn-T6) (Beta-1,3-N-acetylglucosaminyltransferase 6) (Beta3Gn-T6) (EC 2.4.1.-) (Core 3 synthase)	B3GNT6	Homo sapiens (Human)	SUBCELLULAR LOCATION: Golgi apparatus membrane {ECO:0000269|PubMed:15755813}; Single-pass type II membrane protein {ECO:0000269|PubMed:15755813}.			Q6ZMB0;
Q3USF0	2.4.1.-		UDP-GlcNAc:betaGal beta-1,3-N-acetylglucosaminyltransferase 6 (BGnT-6) (Beta-1,3-Gn-T6) (Beta-1,3-N-acetylglucosaminyltransferase 6) (Beta3Gn-T6) (EC 2.4.1.-) (Core 3 synthase)	B3gnt6	Mus musculus (Mouse)	SUBCELLULAR LOCATION: Golgi apparatus membrane {ECO:0000250}; Single-pass type II membrane protein {ECO:0000250}.			Q3USF0;
Q8NFL0	2.4.1.-		UDP-GlcNAc:betaGal beta-1,3-N-acetylglucosaminyltransferase 7 (BGnT-7) (Beta-1,3-Gn-T7) (Beta-1,3-N-acetylglucosaminyltransferase 7) (Beta3Gn-T7) (EC 2.4.1.-)	B3GNT7	Homo sapiens (Human)	SUBCELLULAR LOCATION: Golgi apparatus membrane {ECO:0000305}; Single-pass type II membrane protein {ECO:0000305}.			Q8NFL0;
Q8K0J2	2.4.1.-		UDP-GlcNAc:betaGal beta-1,3-N-acetylglucosaminyltransferase 7 (BGnT-7) (Beta-1,3-Gn-T7) (Beta-1,3-N-acetylglucosaminyltransferase 7) (Beta3Gn-T7) (EC 2.4.1.-)	B3gnt7	Mus musculus (Mouse)	SUBCELLULAR LOCATION: Golgi apparatus membrane {ECO:0000305}; Single-pass type II membrane protein {ECO:0000305}.
Q66H69	2.4.1.-		UDP-GlcNAc:betaGal beta-1,3-N-acetylglucosaminyltransferase 7 (BGnT-7) (Beta-1,3-Gn-T7) (Beta-1,3-N-acetylglucosaminyltransferase 7) (Beta3Gn-T7) (EC 2.4.1.-)	B3gnt7	Rattus norvegicus (Rat)	SUBCELLULAR LOCATION: Golgi apparatus membrane {ECO:0000305}; Single-pass type II membrane protein {ECO:0000305}.			Q66H69;
Q7Z7M8	2.4.1.-		UDP-GlcNAc:betaGal beta-1,3-N-acetylglucosaminyltransferase 8 (BGnT-8) (Beta-1,3-Gn-T8) (Beta-1,3-N-acetylglucosaminyltransferase 8) (Beta3Gn-T8) (EC 2.4.1.-)	B3GNT8 B3GALT7 BGALT15	Homo sapiens (Human)	SUBCELLULAR LOCATION: Golgi apparatus membrane {ECO:0000250|UniProtKB:Q9NY97}; Single-pass type II membrane protein {ECO:0000250|UniProtKB:Q9NY97}.			Q7Z7M8;
Q8R3I9	2.4.1.-		UDP-GlcNAc:betaGal beta-1,3-N-acetylglucosaminyltransferase 8 (BGnT-8) (Beta-1,3-Gn-T8) (Beta-1,3-N-acetylglucosaminyltransferase 8) (Beta3Gn-T8) (EC 2.4.1.-)	B3gnt8 B3galt7	Mus musculus (Mouse)	SUBCELLULAR LOCATION: Golgi apparatus membrane {ECO:0000250|UniProtKB:Q9NY97}; Single-pass type II membrane protein {ECO:0000250|UniProtKB:Q9NY97}.			Q8R3I9;
Q17QZ8	2.4.1.-		UDP-GlcNAc:betaGal beta-1,3-N-acetylglucosaminyltransferase 9 (BGnT-9) (Beta-1,3-Gn-T9) (Beta-1,3-N-acetylglucosaminyltransferase 9) (Beta3Gn-T9) (EC 2.4.1.-)	B3GNT9	Bos taurus (Bovine)	SUBCELLULAR LOCATION: Golgi apparatus membrane {ECO:0000255}; Single-pass type II membrane protein {ECO:0000255}.			Q17QZ8;
Q6UX72	2.4.1.-		UDP-GlcNAc:betaGal beta-1,3-N-acetylglucosaminyltransferase 9 (BGnT-9) (Beta-1,3-Gn-T9) (Beta-1,3-N-acetylglucosaminyltransferase 9) (Beta3Gn-T9) (EC 2.4.1.-)	B3GNT9 UNQ1922/PRO4397	Homo sapiens (Human)	SUBCELLULAR LOCATION: Golgi apparatus membrane {ECO:0000255}; Single-pass type II membrane protein {ECO:0000255}.			Q6UX72;
Q8VI16	2.4.1.-		UDP-GlcNAc:betaGal beta-1,3-N-acetylglucosaminyltransferase 9 (BGnT-9) (Beta-1,3-Gn-T9) (Beta-1,3-N-acetylglucosaminyltransferase 9) (Beta3Gn-T9) (EC 2.4.1.-)	B3gnt9	Mus musculus (Mouse)	SUBCELLULAR LOCATION: Golgi apparatus membrane {ECO:0000255}; Single-pass type II membrane protein {ECO:0000255}.			Q8VI16;
Q9SAA4	2.4.1.-		Probable beta-1,3-galactosyltransferase 1 (EC 2.4.1.-)	B3GALT1 At1g11730 F25C20.12	Arabidopsis thaliana (Mouse-ear cress)	SUBCELLULAR LOCATION: Golgi apparatus membrane {ECO:0000305}; Single-pass type II membrane protein {ECO:0000305}.	COFACTOR: Name=Mn(2+); Xref=ChEBI:CHEBI:29035; Evidence={ECO:0000250};		Q9SAA4;
Q7JK24	2.4.1.-		Beta-1,3-galactosyltransferase 1 (Beta-1,3-GalTase 1) (Beta3Gal-T1) (Beta3GalT1) (EC 2.4.1.-) (UDP-galactose:beta-N-acetyl-glucosamine-beta-1,3-galactosyltransferase 1)	B3GALT1	Gorilla gorilla gorilla (Western lowland gorilla)	SUBCELLULAR LOCATION: Golgi apparatus membrane {ECO:0000305}; Single-pass type II membrane protein {ECO:0000305}.	COFACTOR: Name=Mn(2+); Xref=ChEBI:CHEBI:29035; Evidence={ECO:0000250};		Q7JK24;
Q9Y5Z6	2.4.1.-		Beta-1,3-galactosyltransferase 1 (Beta-1,3-GalTase 1) (Beta3Gal-T1) (Beta3GalT1) (EC 2.4.1.-) (UDP-galactose:beta-N-acetyl-glucosamine-beta-1,3-galactosyltransferase 1)	B3GALT1	Homo sapiens (Human)	SUBCELLULAR LOCATION: Golgi apparatus membrane {ECO:0000305}; Single-pass type II membrane protein {ECO:0000305}.	COFACTOR: Name=Mn(2+); Xref=ChEBI:CHEBI:29035; Evidence={ECO:0000250};		Q9Y5Z6;
O54904	2.4.1.-		Beta-1,3-galactosyltransferase 1 (Beta-1,3-GalTase 1) (Beta3Gal-T1) (Beta3GalT1) (EC 2.4.1.-) (UDP-Gal:betaGlcNAc beta 1,3-galactosyltransferase-I) (UDP-galactose:beta-N-acetyl-glucosamine-beta-1,3-galactosyltransferase 1)	B3galt1	Mus musculus (Mouse)	SUBCELLULAR LOCATION: Golgi apparatus membrane {ECO:0000305}; Single-pass type II membrane protein {ECO:0000305}.	COFACTOR: Name=Mn(2+); Xref=ChEBI:CHEBI:29035; Evidence={ECO:0000269|PubMed:9417047};		O54904;
Q7JK25	2.4.1.-		Beta-1,3-galactosyltransferase 1 (Beta-1,3-GalTase 1) (Beta3Gal-T1) (Beta3GalT1) (EC 2.4.1.-) (UDP-galactose:beta-N-acetyl-glucosamine-beta-1,3-galactosyltransferase 1)	B3GALT1	Pan paniscus (Pygmy chimpanzee) (Bonobo)	SUBCELLULAR LOCATION: Golgi apparatus membrane {ECO:0000305}; Single-pass type II membrane protein {ECO:0000305}.	COFACTOR: Name=Mn(2+); Xref=ChEBI:CHEBI:29035; Evidence={ECO:0000250};		Q7JK25;
Q7JK26	2.4.1.-		Beta-1,3-galactosyltransferase 1 (Beta-1,3-GalTase 1) (Beta3Gal-T1) (Beta3GalT1) (EC 2.4.1.-) (UDP-galactose:beta-N-acetyl-glucosamine-beta-1,3-galactosyltransferase 1)	B3GALT1	Pan troglodytes (Chimpanzee)	SUBCELLULAR LOCATION: Golgi apparatus membrane {ECO:0000305}; Single-pass type II membrane protein {ECO:0000305}.	COFACTOR: Name=Mn(2+); Xref=ChEBI:CHEBI:29035; Evidence={ECO:0000250};		Q7JK26;
Q9MYM7	2.4.1.-		Beta-1,3-galactosyltransferase 1 (Beta-1,3-GalTase 1) (Beta3Gal-T1) (Beta3GalT1) (EC 2.4.1.-) (UDP-galactose:beta-N-acetyl-glucosamine-beta-1,3-galactosyltransferase 1)	B3GALT1	Pongo pygmaeus (Bornean orangutan)	SUBCELLULAR LOCATION: Golgi apparatus membrane {ECO:0000305}; Single-pass type II membrane protein {ECO:0000305}.	COFACTOR: Name=Mn(2+); Xref=ChEBI:CHEBI:29035; Evidence={ECO:0000250};		Q9MYM7;
A8MRC7	2.4.1.-		Probable beta-1,3-galactosyltransferase 2 (EC 2.4.1.-)	B3GALT2 At1g05170 YUP8H12.22	Arabidopsis thaliana (Mouse-ear cress)	SUBCELLULAR LOCATION: Golgi apparatus membrane {ECO:0000305}; Single-pass type II membrane protein {ECO:0000305}.	COFACTOR: Name=Mn(2+); Xref=ChEBI:CHEBI:29035; Evidence={ECO:0000250};		A8MRC7;
O43825	2.4.1.-		Beta-1,3-galactosyltransferase 2 (Beta-1,3-GalTase 2) (Beta3Gal-T2) (Beta3GalT2) (EC 2.4.1.-) (UDP-galactose:2-acetamido-2-deoxy-D-glucose 3beta-galactosyltransferase 2)	B3GALT2	Homo sapiens (Human)	SUBCELLULAR LOCATION: Golgi apparatus membrane {ECO:0000305}; Single-pass type II membrane protein {ECO:0000305}.	COFACTOR: Name=Mn(2+); Xref=ChEBI:CHEBI:29035; Evidence={ECO:0000250};		O43825;
O54905	2.4.1.-		Beta-1,3-galactosyltransferase 2 (Beta-1,3-GalTase 2) (Beta3Gal-T2) (Beta3GalT2) (EC 2.4.1.-) (UDP-Gal:betaGlcNAc beta 1,3-galactosyltransferase-II)	B3galt2	Mus musculus (Mouse)	SUBCELLULAR LOCATION: Golgi apparatus membrane {ECO:0000305}; Single-pass type II membrane protein {ECO:0000305}.	COFACTOR: Name=Mn(2+); Xref=ChEBI:CHEBI:29035; Evidence={ECO:0000269|PubMed:9417047};		O54905;
Q5R5Y3	2.4.1.-		Beta-1,3-galactosyltransferase 2 (Beta-1,3-GalTase 2) (Beta3Gal-T2) (Beta3GalT2) (EC 2.4.1.-) (UDP-galactose:2-acetamido-2-deoxy-D-glucose 3beta-galactosyltransferase 2)	B3GALT2	Pongo abelii (Sumatran orangutan) (Pongo pygmaeus abelii)	SUBCELLULAR LOCATION: Golgi apparatus membrane {ECO:0000305}; Single-pass type II membrane protein {ECO:0000305}.	COFACTOR: Name=Mn(2+); Xref=ChEBI:CHEBI:29035; Evidence={ECO:0000250};
Q9ZV71	2.4.1.-		Probable beta-1,3-galactosyltransferase 3 (EC 2.4.1.-)	B3GALT3 At2g32430 T32F6.5	Arabidopsis thaliana (Mouse-ear cress)	SUBCELLULAR LOCATION: Golgi apparatus membrane {ECO:0000305}; Single-pass type II membrane protein {ECO:0000305}.	COFACTOR: Name=Mn(2+); Xref=ChEBI:CHEBI:29035; Evidence={ECO:0000250};		Q9ZV71;
Q8LEJ9	2.4.1.-		Probable beta-1,3-galactosyltransferase 4 (EC 2.4.1.-)	B3GALT4 At4g26940 F10M23.280	Arabidopsis thaliana (Mouse-ear cress)	SUBCELLULAR LOCATION: Golgi apparatus membrane {ECO:0000305}; Single-pass type II membrane protein {ECO:0000305}.	COFACTOR: Name=Mn(2+); Xref=ChEBI:CHEBI:29035; Evidence={ECO:0000250};		Q8LEJ9;
Q5TJE8	2.4.1.62		Beta-1,3-galactosyltransferase 4 (Beta-1,3-GalTase 4) (Beta3Gal-T4) (Beta3GalT4) (GalT4) (b3Gal-T4) (EC 2.4.1.62) (Gal-T2) (Ganglioside galactosyltransferase) (UDP-galactose:beta-N-acetyl-galactosamine-beta-1,3-galactosyltransferase)	B3GALT4	Canis familiaris (Dog) (Canis lupus familiaris)	SUBCELLULAR LOCATION: Golgi apparatus membrane {ECO:0000250}; Single-pass type II membrane protein {ECO:0000250}.
O96024	2.4.1.62		Beta-1,3-galactosyltransferase 4 (Beta-1,3-GalTase 4) (Beta3Gal-T4) (Beta3GalT4) (GalT4) (b3Gal-T4) (EC 2.4.1.62) (Gal-T2) (Ganglioside galactosyltransferase) (UDP-galactose:beta-N-acetyl-galactosamine-beta-1,3-galactosyltransferase)	B3GALT4 GALT4	Homo sapiens (Human)	SUBCELLULAR LOCATION: Golgi apparatus membrane; Single-pass type II membrane protein.			O96024;
Q9Z0F0	2.4.1.62		Beta-1,3-galactosyltransferase 4 (Beta-1,3-GalTase 4) (Beta3Gal-T4) (Beta3GalT4) (b3Gal-T4) (EC 2.4.1.62) (Gal-T2) (Ganglioside galactosyltransferase) (UDP-galactose:beta-N-acetyl-galactosamine-beta-1,3-galactosyltransferase)	B3galt4	Mus musculus (Mouse)	SUBCELLULAR LOCATION: Golgi apparatus membrane; Single-pass type II membrane protein.			Q9Z0F0;
O88178	2.4.1.62		Beta-1,3-galactosyltransferase 4 (Beta-1,3-GalTase 4) (Beta3Gal-T4) (Beta3GalT4) (b3Gal-T4) (EC 2.4.1.62) (Gal-T2) (Ganglioside galactosyltransferase) (UDP-galactose:beta-N-acetyl-galactosamine-beta-1,3-galactosyltransferase)	B3galt4	Rattus norvegicus (Rat)	SUBCELLULAR LOCATION: Golgi apparatus membrane; Single-pass type II membrane protein.			O88178;
Q9LM60	2.4.1.-		Probable beta-1,3-galactosyltransferase 5 (EC 2.4.1.-)	B3GALT5 At1g22015 F2E2.6	Arabidopsis thaliana (Mouse-ear cress)	SUBCELLULAR LOCATION: Golgi apparatus membrane {ECO:0000305}; Single-pass type II membrane protein {ECO:0000305}.	COFACTOR: Name=Mn(2+); Xref=ChEBI:CHEBI:29035; Evidence={ECO:0000250};		Q9LM60;
Q9N293	2.4.1.-		Beta-1,3-galactosyltransferase 5 (Beta-1,3-GalTase 5) (Beta3Gal-T5) (Beta3GalT5) (b3Gal-T5) (EC 2.4.1.-) (Beta-3-Gx-T5) (UDP-Gal:beta-GlcNAc beta-1,3-galactosyltransferase 5) (UDP-galactose:beta-N-acetylglucosamine beta-1,3-galactosyltransferase 5) (Fragment)	B3GALT5	Gorilla gorilla gorilla (Western lowland gorilla)	SUBCELLULAR LOCATION: Golgi apparatus membrane {ECO:0000305}; Single-pass type II membrane protein {ECO:0000305}.			Q9N293;
Q9Y2C3	2.4.1.-		Beta-1,3-galactosyltransferase 5 (Beta-1,3-GalTase 5) (Beta3Gal-T5) (Beta3GalT5) (b3Gal-T5) (EC 2.4.1.-) (Beta-3-Gx-T5) (UDP-Gal:beta-GlcNAc beta-1,3-galactosyltransferase 5) (UDP-galactose:beta-N-acetylglucosamine beta-1,3-galactosyltransferase 5)	B3GALT5	Homo sapiens (Human)	SUBCELLULAR LOCATION: Golgi apparatus membrane {ECO:0000305}; Single-pass type II membrane protein {ECO:0000305}.			Q9Y2C3;
Q9JI67	2.4.1.-		Beta-1,3-galactosyltransferase 5 (Beta-1,3-GalTase 5) (Beta3Gal-T5) (Beta3GalT5) (b3Gal-T5) (EC 2.4.1.-) (Beta-3-Gx-T5) (Stage-specific embryonic antigen 3 synthase) (SSEA-3 synthase) (UDP-Gal:beta-GlcNAc beta-1,3-galactosyltransferase 5) (UDP-galactose:beta-N-acetylglucosamine beta-1,3-galactosyltransferase 5)	B3galt5 B3gt5	Mus musculus (Mouse)	SUBCELLULAR LOCATION: Golgi apparatus membrane {ECO:0000305}; Single-pass type II membrane protein {ECO:0000305}.			Q9JI67;
Q9N294	2.4.1.-		Beta-1,3-galactosyltransferase 5 (Beta-1,3-GalTase 5) (Beta3Gal-T5) (Beta3GalT5) (b3Gal-T5) (EC 2.4.1.-) (Beta-3-Gx-T5) (UDP-Gal:beta-GlcNAc beta-1,3-galactosyltransferase 5) (UDP-galactose:beta-N-acetylglucosamine beta-1,3-galactosyltransferase 5) (Fragment)	B3GALT5	Pan paniscus (Pygmy chimpanzee) (Bonobo)	SUBCELLULAR LOCATION: Golgi apparatus membrane {ECO:0000305}; Single-pass type II membrane protein {ECO:0000305}.			Q9N294;
Q9N295	2.4.1.-		Beta-1,3-galactosyltransferase 5 (Beta-1,3-GalTase 5) (Beta3Gal-T5) (Beta3GalT5) (b3Gal-T5) (EC 2.4.1.-) (Beta-3-Gx-T5) (UDP-Gal:beta-GlcNAc beta-1,3-galactosyltransferase 5) (UDP-galactose:beta-N-acetylglucosamine beta-1,3-galactosyltransferase 5) (Fragment)	B3GALT5	Pan troglodytes (Chimpanzee)	SUBCELLULAR LOCATION: Golgi apparatus membrane {ECO:0000305}; Single-pass type II membrane protein {ECO:0000305}.			Q9N295;
Q9MAP8	2.4.1.-		Probable beta-1,3-galactosyltransferase 6 (EC 2.4.1.-)	B3GALT6 At1g32930 F9L11.10	Arabidopsis thaliana (Mouse-ear cress)	SUBCELLULAR LOCATION: Golgi apparatus membrane {ECO:0000305}; Single-pass type II membrane protein {ECO:0000305}.	COFACTOR: Name=Mn(2+); Xref=ChEBI:CHEBI:29035; Evidence={ECO:0000250};		Q9MAP8;
Q96L58	2.4.1.134		Beta-1,3-galactosyltransferase 6 (Beta-1,3-GalTase 6) (Beta3Gal-T6) (Beta3GalT6) (EC 2.4.1.134) (GAG GalTII) (Galactosyltransferase II) (Galactosylxylosylprotein 3-beta-galactosyltransferase) (UDP-Gal:betaGal beta 1,3-galactosyltransferase polypeptide 6)	B3GALT6	Homo sapiens (Human)	SUBCELLULAR LOCATION: Golgi apparatus, Golgi stack membrane {ECO:0000269|PubMed:11551958}; Single-pass type II membrane protein {ECO:0000269|PubMed:11551958}.	COFACTOR: Name=Mn(2+); Xref=ChEBI:CHEBI:29035; Evidence={ECO:0000269|PubMed:9892646};		Q96L58;
Q91Z92	2.4.1.134		Beta-1,3-galactosyltransferase 6 (Beta-1,3-GalTase 6) (Beta3Gal-T6) (Beta3GalT6) (EC 2.4.1.134) (GAG GalTII) (Galactosyltransferase II) (Galactosylxylosylprotein 3-beta-galactosyltransferase) (UDP-Gal:betaGal beta 1,3-galactosyltransferase polypeptide 6)	B3galt6	Mus musculus (Mouse)	SUBCELLULAR LOCATION: Golgi apparatus membrane {ECO:0000250}; Single-pass type II membrane protein {ECO:0000250}.	COFACTOR: Name=Mn(2+); Xref=ChEBI:CHEBI:29035; Evidence={ECO:0000250};		Q91Z92;
Q6NQB7	2.4.1.-		Beta-1,3-galactosyltransferase 7 (EC 2.4.1.-)	B3GALT7 At1g77810 F28K19.2 T32E8.14	Arabidopsis thaliana (Mouse-ear cress)	SUBCELLULAR LOCATION: Golgi apparatus membrane {ECO:0000269|PubMed:18548197}; Single-pass type II membrane protein {ECO:0000269|PubMed:18548197}.	COFACTOR: Name=Mn(2+); Xref=ChEBI:CHEBI:29035; Evidence={ECO:0000305};		Q6NQB7;
Q9C809	2.4.1.-		Probable beta-1,3-galactosyltransferase 8 (EC 2.4.1.-)	B3GALT8 At1g33430 F10C21.10	Arabidopsis thaliana (Mouse-ear cress)	SUBCELLULAR LOCATION: Golgi apparatus membrane {ECO:0000305}; Single-pass type II membrane protein {ECO:0000305}.	COFACTOR: Name=Mn(2+); Xref=ChEBI:CHEBI:29035; Evidence={ECO:0000250};		Q9C809;
Q5XEZ1	2.4.1.-		Probable beta-1,3-galactosyltransferase 9 (EC 2.4.1.-)	B3GALT9 At2g25300 T22F11.11	Arabidopsis thaliana (Mouse-ear cress)	SUBCELLULAR LOCATION: Golgi apparatus membrane {ECO:0000305}; Single-pass type II membrane protein {ECO:0000305}.	COFACTOR: Name=Mn(2+); Xref=ChEBI:CHEBI:29035; Evidence={ECO:0000250};		Q5XEZ1;
Q94A05	2.4.1.-		Probable beta-1,3-galactosyltransferase 10 (EC 2.4.1.-)	B3GALT10 At4g32120 F10N7.70	Arabidopsis thaliana (Mouse-ear cress)	SUBCELLULAR LOCATION: Golgi apparatus membrane {ECO:0000305}; Single-pass type II membrane protein {ECO:0000305}.	COFACTOR: Name=Mn(2+); Xref=ChEBI:CHEBI:29035; Evidence={ECO:0000250};		Q94A05;
Q94F27	2.4.1.-		Probable beta-1,3-galactosyltransferase 11 (EC 2.4.1.-)	B3GALT11 At5g53340 K19E1.14	Arabidopsis thaliana (Mouse-ear cress)	SUBCELLULAR LOCATION: Golgi apparatus membrane {ECO:0000305}; Single-pass type II membrane protein {ECO:0000305}.	COFACTOR: Name=Mn(2+); Xref=ChEBI:CHEBI:29035; Evidence={ECO:0000250};		Q94F27;
Q66GS2	2.4.1.-		Probable beta-1,3-galactosyltransferase 12 (EC 2.4.1.-)	B3GALT12 At2g26100 T19L18.9	Arabidopsis thaliana (Mouse-ear cress)	SUBCELLULAR LOCATION: Golgi apparatus membrane {ECO:0000305}; Single-pass type II membrane protein {ECO:0000305}.	COFACTOR: Name=Mn(2+); Xref=ChEBI:CHEBI:29035; Evidence={ECO:0000250};		Q66GS2;
Q9LKA9	2.4.1.-		Probable beta-1,3-galactosyltransferase 13 (EC 2.4.1.-)	B3GALT13 At3g14960 K15M2.10	Arabidopsis thaliana (Mouse-ear cress)	SUBCELLULAR LOCATION: Golgi apparatus membrane {ECO:0000305}; Single-pass type II membrane protein {ECO:0000305}.	COFACTOR: Name=Mn(2+); Xref=ChEBI:CHEBI:29035; Evidence={ECO:0000250};		Q9LKA9;
Q8L7M1	2.4.1.-		Probable beta-1,3-galactosyltransferase 14 (EC 2.4.1.-)	B3GALT14 At1g53290 F12M16.19	Arabidopsis thaliana (Mouse-ear cress)	SUBCELLULAR LOCATION: Golgi apparatus membrane {ECO:0000305}; Single-pass type II membrane protein {ECO:0000305}.	COFACTOR: Name=Mn(2+); Xref=ChEBI:CHEBI:29035; Evidence={ECO:0000250};		Q8L7M1;
Q8L7F9	2.4.1.-		Beta-1,3-galactosyltransferase 15 (EC 2.4.1.-) (Galactosyltransferase 1)	B3GALT15 GALT1 At1g26810 T24P13.20	Arabidopsis thaliana (Mouse-ear cress)	SUBCELLULAR LOCATION: Golgi apparatus membrane {ECO:0000269|PubMed:17630273}; Single-pass type II membrane protein {ECO:0000269|PubMed:17630273}.	COFACTOR: Name=Mn(2+); Xref=ChEBI:CHEBI:29035; Evidence={ECO:0000269|PubMed:17630273};		Q8L7F9;
Q9ASW1	2.4.1.-		Probable beta-1,3-galactosyltransferase 16 (EC 2.4.1.-)	B3GALT16 At3g06440 F24P17.7	Arabidopsis thaliana (Mouse-ear cress)	SUBCELLULAR LOCATION: Golgi apparatus membrane {ECO:0000305}; Single-pass type II membrane protein {ECO:0000305}.	COFACTOR: Name=Mn(2+); Xref=ChEBI:CHEBI:29035; Evidence={ECO:0000250};		Q9ASW1;
Q8GXG6	2.4.1.-		Probable beta-1,3-galactosyltransferase 17 (EC 2.4.1.-)	B3GALT17 At1g27120 T7N9.18	Arabidopsis thaliana (Mouse-ear cress)	SUBCELLULAR LOCATION: Golgi apparatus membrane {ECO:0000305}; Single-pass type II membrane protein {ECO:0000305}.	COFACTOR: Name=Mn(2+); Xref=ChEBI:CHEBI:29035; Evidence={ECO:0000250};		Q8GXG6;
Q8RX55	2.4.1.-		Probable beta-1,3-galactosyltransferase 18 (EC 2.4.1.-)	B3GALT18 At1g74800 F25A4.23	Arabidopsis thaliana (Mouse-ear cress)	SUBCELLULAR LOCATION: Golgi apparatus membrane {ECO:0000305}; Single-pass type II membrane protein {ECO:0000305}.	COFACTOR: Name=Mn(2+); Xref=ChEBI:CHEBI:29035; Evidence={ECO:0000250};		Q8RX55;
Q9LV16	2.4.1.-		Probable beta-1,3-galactosyltransferase 19 (EC 2.4.1.-)	B3GALT19 At5g62620 MRG21.3	Arabidopsis thaliana (Mouse-ear cress)	SUBCELLULAR LOCATION: Golgi apparatus membrane {ECO:0000305}; Single-pass type II membrane protein {ECO:0000305}.	COFACTOR: Name=Mn(2+); Xref=ChEBI:CHEBI:29035; Evidence={ECO:0000250};		Q9LV16;
A7XDQ9	2.4.1.-		Probable beta-1,3-galactosyltransferase 20 (EC 2.4.1.-)	B3GALT20 At4g21060 T13K14.220	Arabidopsis thaliana (Mouse-ear cress)	SUBCELLULAR LOCATION: Golgi apparatus membrane {ECO:0000305}; Single-pass type II membrane protein {ECO:0000305}.	COFACTOR: Name=Mn(2+); Xref=ChEBI:CHEBI:29035; Evidence={ECO:0000250};		A7XDQ9;
Q5EA01	2.4.1.-		Beta-1,4-glucuronyltransferase 1 (EC 2.4.1.-) (I-beta-1,3-N-acetylglucosaminyltransferase) (iGnT) (N-acetyllactosaminide beta-1,3-N-acetylglucosaminyltransferase) (Poly-N-acetyllactosamine extension enzyme) (UDP-GlcNAc:betaGal beta-1,3-N-acetylglucosaminyltransferase 1)	B3GNT1 B3GNT6	Bos taurus (Bovine)	SUBCELLULAR LOCATION: Golgi apparatus membrane {ECO:0000250|UniProtKB:O43505, ECO:0000250|UniProtKB:Q8BWP8}; Single-pass type II membrane protein. Note=Localizes near the trans-Golgi apparatus. {ECO:0000250|UniProtKB:O43505}.	COFACTOR: Name=Mn(2+); Xref=ChEBI:CHEBI:29035; Evidence={ECO:0000250|UniProtKB:O43505};	METAL 227 227 Manganese. {ECO:0000250|UniProtKB:O43505}.; METAL 229 229 Manganese. {ECO:0000250|UniProtKB:O43505}.
L7YAI7	2.4.1.-		Beta-1,4-glucuronyltransferase 1 (EC 2.4.1.-) (I-beta-1,3-N-acetylglucosaminyltransferase) (N-acetyllactosaminide beta-1,3-N-acetylglucosaminyltransferase) (Poly-N-acetyllactosamine extension enzyme) (UDP-GlcNAc:betaGal beta-1,3-N-acetylglucosaminyltransferase 1)	b3gnt1	Danio rerio (Zebrafish) (Brachydanio rerio)	SUBCELLULAR LOCATION: Golgi apparatus membrane {ECO:0000250|UniProtKB:O43505, ECO:0000250|UniProtKB:Q8BWP8}; Single-pass type II membrane protein. Note=Localizes near the trans-Golgi apparatus. {ECO:0000250|UniProtKB:O43505}.	COFACTOR: Name=Mn(2+); Xref=ChEBI:CHEBI:29035; Evidence={ECO:0000250|UniProtKB:O43505};	METAL 241 241 Manganese. {ECO:0000250|UniProtKB:O43505}.; METAL 243 243 Manganese. {ECO:0000250|UniProtKB:O43505}.
O43505	2.4.1.-		Beta-1,4-glucuronyltransferase 1 (EC 2.4.1.-) (I-beta-1,3-N-acetylglucosaminyltransferase) (iGnT) (N-acetyllactosaminide beta-1,3-N-acetylglucosaminyltransferase) (Poly-N-acetyllactosamine extension enzyme) (UDP-GlcNAc:betaGal beta-1,3-N-acetylglucosaminyltransferase 1)	B3GNT1 B3GNT6 B4GAT1	Homo sapiens (Human)	SUBCELLULAR LOCATION: Golgi apparatus membrane {ECO:0000269|PubMed:19587235, ECO:0000269|PubMed:23359570, ECO:0000269|PubMed:25279699}; Single-pass type II membrane protein {ECO:0000269|PubMed:23359570}. Note=Localizes near the trans-Golgi apparatus. {ECO:0000269|PubMed:25279699}.	COFACTOR: Name=Mn(2+); Xref=ChEBI:CHEBI:29035; Evidence={ECO:0000269|PubMed:25279699};	METAL 227 227 Manganese. {ECO:0000305|PubMed:25279699}.; METAL 229 229 Manganese. {ECO:0000305|PubMed:25279699}.	O43505;
Q8BWP8	2.4.1.-		Beta-1,4-glucuronyltransferase 1 (EC 2.4.1.-) (I-beta-1,3-N-acetylglucosaminyltransferase) (iGnT) (N-acetyllactosaminide beta-1,3-N-acetylglucosaminyltransferase) (Poly-N-acetyllactosamine extension enzyme) (UDP-GlcNAc:betaGal beta-1,3-N-acetylglucosaminyltransferase 1)	B3gnt1 B3gnt6	Mus musculus (Mouse)	SUBCELLULAR LOCATION: Golgi apparatus membrane {ECO:0000269|PubMed:23217742}; Single-pass type II membrane protein. Note=Localizes near the trans-Golgi apparatus. {ECO:0000250|UniProtKB:O43505}.	COFACTOR: Name=Mn(2+); Xref=ChEBI:CHEBI:29035; Evidence={ECO:0000250|UniProtKB:O43505};	METAL 227 227 Manganese. {ECO:0000250|UniProtKB:O43505}.; METAL 229 229 Manganese. {ECO:0000250|UniProtKB:O43505}.	Q8BWP8;
Q00973	2.4.1.92		Beta-1,4 N-acetylgalactosaminyltransferase 1 (EC 2.4.1.92) ((N-acetylneuraminyl)-galactosylglucosylceramide) (GM2/GD2 synthase) (GalNAc-T)	B4GALNT1 GALGT SIAT2	Homo sapiens (Human)	SUBCELLULAR LOCATION: Golgi apparatus membrane; Single-pass type II membrane protein.			Q00973;
Q5R4S2	2.4.1.-		Beta-1,4-glucuronyltransferase 1 (EC 2.4.1.-) (I-beta-1,3-N-acetylglucosaminyltransferase) (iGnT) (N-acetyllactosaminide beta-1,3-N-acetylglucosaminyltransferase) (Poly-N-acetyllactosamine extension enzyme) (UDP-GlcNAc:betaGal beta-1,3-N-acetylglucosaminyltransferase 1)	B3GNT1 B3GNT6	Pongo abelii (Sumatran orangutan) (Pongo pygmaeus abelii)	SUBCELLULAR LOCATION: Golgi apparatus membrane {ECO:0000250|UniProtKB:O43505, ECO:0000250|UniProtKB:Q8BWP8}; Single-pass type II membrane protein. Note=Localizes near the trans-Golgi apparatus. {ECO:0000250|UniProtKB:O43505}.	COFACTOR: Name=Mn(2+); Xref=ChEBI:CHEBI:29035; Evidence={ECO:0000250|UniProtKB:O43505};	METAL 227 227 Manganese. {ECO:0000250|UniProtKB:O43505}.; METAL 229 229 Manganese. {ECO:0000250|UniProtKB:O43505}.
Q09200	2.4.1.92		Beta-1,4 N-acetylgalactosaminyltransferase 1 (EC 2.4.1.92) ((N-acetylneuraminyl)-galactosylglucosylceramide) (GM2/GD2 synthase) (GalNAc-T)	B4galnt1 Galgt Galgt1 Ggm2	Mus musculus (Mouse)	SUBCELLULAR LOCATION: Golgi apparatus membrane; Single-pass type II membrane protein.			Q09200;
Q10468	2.4.1.92		Beta-1,4 N-acetylgalactosaminyltransferase 1 (EC 2.4.1.92) ((N-acetylneuraminyl)-galactosylglucosylceramide) (GM2/GD2 synthase) (GalNAc-T)	B4galnt1 Galgt Galgt1	Rattus norvegicus (Rat)	SUBCELLULAR LOCATION: Golgi apparatus membrane; Single-pass type II membrane protein.			Q10468;
Q8NHY0	2.4.1.-		Beta-1,4 N-acetylgalactosaminyltransferase 2 (EC 2.4.1.-) (Sd(a) beta-1,4-GalNAc transferase) (UDP-GalNAc:Neu5Aca2-3Galb-R b1,4-N-acetylgalactosaminyltransferase)	B4GALNT2 GALGT2	Homo sapiens (Human)	SUBCELLULAR LOCATION: Golgi apparatus membrane {ECO:0000305}; Single-pass type II membrane protein {ECO:0000305}.			Q8NHY0;
Q09199	2.4.1.-		Beta-1,4 N-acetylgalactosaminyltransferase 2 (EC 2.4.1.-)	B4galnt2 Galgt2 Ggm3	Mus musculus (Mouse)	SUBCELLULAR LOCATION: Golgi apparatus membrane; Single-pass type II membrane protein.			Q09199;
Q6L9W6	2.4.1.244		Beta-1,4-N-acetylgalactosaminyltransferase 3 (B4GalNAcT3) (Beta4GalNAc-T3) (Beta4GalNAcT3) (EC 2.4.1.244) (Beta-1,4-N-acetylgalactosaminyltransferase III) (N-acetyl-beta-glucosaminyl-glycoprotein 4-beta-N-acetylgalactosaminyltransferase 2) (NGalNAc-T2)	B4GALNT3	Homo sapiens (Human)	SUBCELLULAR LOCATION: Golgi apparatus, Golgi stack membrane {ECO:0000269|PubMed:16728562}; Single-pass type II membrane protein {ECO:0000269|PubMed:16728562}. Note=Localizes to apical Golgi.			Q6L9W6;
Q6L8S8	2.4.1.244		Beta-1,4-N-acetylgalactosaminyltransferase 3 (Beta4GalNAc-T3) (Beta4GalNAcT3) (EC 2.4.1.244) (Beta-1,4-N-acetylgalactosaminyltransferase III) (N-acetyl-beta-glucosaminyl-glycoprotein 4-beta-N-acetylgalactosaminyltransferase 2) (NGalNAc-T2)	B4galnt3	Mus musculus (Mouse)	SUBCELLULAR LOCATION: Golgi apparatus, Golgi stack membrane; Single-pass type II membrane protein. Note=Localizes to apical Golgi. {ECO:0000250}.			Q6L8S8;
Q76KP1	2.4.1.244		N-acetyl-beta-glucosaminyl-glycoprotein 4-beta-N-acetylgalactosaminyltransferase 1 (NGalNAc-T1) (EC 2.4.1.244) (Beta-1,4-N-acetylgalactosaminyltransferase IV) (Beta4GalNAc-T4) (Beta4GalNAcT4)	B4GALNT4	Homo sapiens (Human)	SUBCELLULAR LOCATION: Golgi apparatus, Golgi stack membrane {ECO:0000250}; Single-pass type II membrane protein {ECO:0000250}.			Q76KP1;
Q766D5	2.4.1.244		N-acetyl-beta-glucosaminyl-glycoprotein 4-beta-N-acetylgalactosaminyltransferase 1 (NGalNAc-T1) (EC 2.4.1.244) (Beta-1,4-N-acetylgalactosaminyltransferase IV) (Beta4GalNAc-T4) (Beta4GalNAcT4)	B4galnt4	Mus musculus (Mouse)	SUBCELLULAR LOCATION: Golgi apparatus, Golgi stack membrane {ECO:0000250}; Single-pass type II membrane protein {ECO:0000250}.			Q766D5;
P08037	2.4.1.-; 2.4.1.22; 2.4.1.90; 2.4.1.38; 2.4.1.-	BINDING 314 314 UDP-alpha-D-galactose.; BINDING 359 359 N-acetyl-D-glucosamine.	Beta-1,4-galactosyltransferase 1 (Beta-1,4-GalTase 1) (Beta4Gal-T1) (b4Gal-T1) (EC 2.4.1.-) (UDP-Gal:beta-GlcNAc beta-1,4-galactosyltransferase 1) (UDP-galactose:beta-N-acetylglucosamine beta-1,4-galactosyltransferase 1) [Cleaved into: Processed beta-1,4-galactosyltransferase 1] [Includes: Lactose synthase A protein (EC 2.4.1.22); N-acetyllactosamine synthase (EC 2.4.1.90) (Nal synthase); Beta-N-…	B4GALT1 GALT GGTB2	Bos taurus (Bovine)	SUBCELLULAR LOCATION: Isoform Long: Golgi apparatus, Golgi stack membrane {ECO:0000250|UniProtKB:P15535}; Single-pass type II membrane protein. Cell membrane; Single-pass type II membrane protein. Cell surface. Cell projection, filopodium {ECO:0000250|UniProtKB:P15535}. Note=Found in trans cisternae of Golgi. B4GALT1 cell surface expression is regulated by UBE2Q1 (By similarity). {ECO:0000250|Uni…	COFACTOR: Name=Mn(2+); Xref=ChEBI:CHEBI:29035;	METAL 254 254 Manganese.; METAL 347 347 Manganese; via tele nitrogen.	P08037;
P15291	2.4.1.-; 2.4.1.22; 2.4.1.90; 2.4.1.38; 2.4.1.-	BINDING 310 310 UDP-alpha-D-galactose. {ECO:0000269|PubMed:16497331}.; BINDING 355 355 N-acetyl-D-glucosamine. {ECO:0000269|PubMed:16157350, ECO:0000269|PubMed:19106107}.	Beta-1,4-galactosyltransferase 1 (Beta-1,4-GalTase 1) (Beta4Gal-T1) (b4Gal-T1) (EC 2.4.1.-) (UDP-Gal:beta-GlcNAc beta-1,4-galactosyltransferase 1) (UDP-galactose:beta-N-acetylglucosamine beta-1,4-galactosyltransferase 1) [Cleaved into: Processed beta-1,4-galactosyltransferase 1] [Includes: Lactose synthase A protein (EC 2.4.1.22); N-acetyllactosamine synthase (EC 2.4.1.90) (Nal synthase); Beta-N-…	B4GALT1 GGTB2	Homo sapiens (Human)	SUBCELLULAR LOCATION: Isoform Long: Golgi apparatus, Golgi stack membrane {ECO:0000269|PubMed:1714903}; Single-pass type II membrane protein. Cell membrane {ECO:0000269|PubMed:1714903}; Single-pass type II membrane protein. Cell surface {ECO:0000269|PubMed:1714903}. Cell projection, filopodium {ECO:0000250|UniProtKB:P15535}. Note=Found in trans cisternae of Golgi but is mainly localized at the pl…	COFACTOR: Name=Mn(2+); Xref=ChEBI:CHEBI:29035; Evidence={ECO:0000269|PubMed:16157350, ECO:0000269|PubMed:16497331, ECO:0000269|PubMed:19106107};	METAL 250 250 Manganese.; METAL 343 343 Manganese; via tele nitrogen.	P15291;
P15535	2.4.1.-; 2.4.1.22; 2.4.1.90; 2.4.1.38; 2.4.1.-	BINDING 311 311 UDP-alpha-D-galactose. {ECO:0000250}.; BINDING 356 356 N-acetyl-D-glucosamine. {ECO:0000250}.	Beta-1,4-galactosyltransferase 1 (Beta-1,4-GalTase 1) (Beta4Gal-T1) (b4Gal-T1) (EC 2.4.1.-) (UDP-Gal:beta-GlcNAc beta-1,4-galactosyltransferase 1) (UDP-galactose:beta-N-acetylglucosamine beta-1,4-galactosyltransferase 1) [Cleaved into: Processed beta-1,4-galactosyltransferase 1] [Includes: Lactose synthase A protein (EC 2.4.1.22); N-acetyllactosamine synthase (EC 2.4.1.90) (Nal synthase); Beta-N-…	B4galt1 Ggtb Ggtb2	Mus musculus (Mouse)	SUBCELLULAR LOCATION: Isoform Long: Golgi apparatus, Golgi stack membrane {ECO:0000269|PubMed:18511602}; Single-pass type II membrane protein. Cell membrane; Single-pass type II membrane protein. Cell surface. Cell projection, filopodium {ECO:0000269|PubMed:18511602}. Note=Found in trans cisternae of Golgi. B4GALT1 cell surface expression is regulated by UBE2Q1 (PubMed:18511602). {ECO:0000269|Pub…	COFACTOR: Name=Mn(2+); Xref=ChEBI:CHEBI:29035; Evidence={ECO:0000250};	METAL 251 251 Manganese. {ECO:0000250}.; METAL 344 344 Manganese; via tele nitrogen. {ECO:0000250}.	P15535;
Q80WN9	2.4.1.-; 2.4.1.22; 2.4.1.90; 2.4.1.38; 2.4.1.-	BINDING 275 275 UDP-alpha-D-galactose. {ECO:0000250}.; BINDING 320 320 N-acetyl-D-glucosamine. {ECO:0000250}.	Beta-1,4-galactosyltransferase 2 (Beta-1,4-GalTase 2) (Beta4Gal-T2) (b4Gal-T2) (EC 2.4.1.-) (UDP-Gal:beta-GlcNAc beta-1,4-galactosyltransferase 2) (UDP-galactose:beta-N-acetylglucosamine beta-1,4-galactosyltransferase 2) [Includes: Lactose synthase A protein (EC 2.4.1.22); N-acetyllactosamine synthase (EC 2.4.1.90) (Nal synthase); Beta-N-acetylglucosaminylglycopeptide beta-1,4-galactosyltransfera…	B4GALT2	Cricetulus griseus (Chinese hamster) (Cricetulus barabensis griseus)	SUBCELLULAR LOCATION: Golgi apparatus, Golgi stack membrane {ECO:0000250}; Single-pass type II membrane protein {ECO:0000250}. Note=Trans cisternae of Golgi stack. {ECO:0000250}.	COFACTOR: Name=Mn(2+); Xref=ChEBI:CHEBI:29035; Evidence={ECO:0000250};	METAL 215 215 Manganese. {ECO:0000250}.; METAL 308 308 Manganese; via tele nitrogen. {ECO:0000250}.	Q80WN9;
O60909	2.4.1.-; 2.4.1.22; 2.4.1.90; 2.4.1.38; 2.4.1.-	BINDING 278 278 UDP-alpha-D-galactose. {ECO:0000250}.; BINDING 323 323 N-acetyl-D-glucosamine. {ECO:0000250}.	Beta-1,4-galactosyltransferase 2 (Beta-1,4-GalTase 2) (Beta4Gal-T2) (b4Gal-T2) (EC 2.4.1.-) (UDP-Gal:beta-GlcNAc beta-1,4-galactosyltransferase 2) (UDP-galactose:beta-N-acetylglucosamine beta-1,4-galactosyltransferase 2) [Includes: Lactose synthase A protein (EC 2.4.1.22); N-acetyllactosamine synthase (EC 2.4.1.90) (Nal synthase); Beta-N-acetylglucosaminylglycopeptide beta-1,4-galactosyltransfera…	B4GALT2	Homo sapiens (Human)	SUBCELLULAR LOCATION: Golgi apparatus, Golgi stack membrane; Single-pass type II membrane protein. Note=Trans cisternae of Golgi stack.	COFACTOR: Name=Mn(2+); Xref=ChEBI:CHEBI:29035; Evidence={ECO:0000250};	METAL 218 218 Manganese. {ECO:0000250}.; METAL 311 311 Manganese; via tele nitrogen. {ECO:0000250}.	O60909;
Q9Z2Y2	2.4.1.-; 2.4.1.22; 2.4.1.90; 2.4.1.38; 2.4.1.-	BINDING 275 275 UDP-alpha-D-galactose. {ECO:0000250}.; BINDING 320 320 N-acetyl-D-glucosamine. {ECO:0000250}.	Beta-1,4-galactosyltransferase 2 (Beta-1,4-GalTase 2) (Beta4Gal-T2) (b4Gal-T2) (EC 2.4.1.-) (UDP-Gal:beta-GlcNAc beta-1,4-galactosyltransferase 2) (UDP-galactose:beta-N-acetylglucosamine beta-1,4-galactosyltransferase 2) [Includes: Lactose synthase A protein (EC 2.4.1.22); N-acetyllactosamine synthase (EC 2.4.1.90) (Nal synthase); Beta-N-acetylglucosaminylglycopeptide beta-1,4-galactosyltransfera…	B4galt2	Mus musculus (Mouse)	SUBCELLULAR LOCATION: Golgi apparatus, Golgi stack membrane {ECO:0000250}; Single-pass type II membrane protein {ECO:0000250}. Note=Trans cisternae of Golgi stack. {ECO:0000250}.	COFACTOR: Name=Mn(2+); Xref=ChEBI:CHEBI:29035; Evidence={ECO:0000250};	METAL 215 215 Manganese. {ECO:0000250}.; METAL 308 308 Manganese; via tele nitrogen. {ECO:0000250}.	Q9Z2Y2;
Q5EA87	2.4.1.-; 2.4.1.90; 2.4.1.38; 2.4.1.-	BINDING 229 229 UDP-alpha-D-galactose. {ECO:0000250}.; BINDING 261 261 UDP-alpha-D-galactose. {ECO:0000250}.; BINDING 306 306 N-acetyl-D-glucosamine. {ECO:0000250}.	Beta-1,4-galactosyltransferase 3 (Beta-1,4-GalTase 3) (Beta4Gal-T3) (b4Gal-T3) (EC 2.4.1.-) (UDP-Gal:beta-GlcNAc beta-1,4-galactosyltransferase 3) (UDP-galactose:beta-N-acetylglucosamine beta-1,4-galactosyltransferase 3) [Includes: N-acetyllactosamine synthase (EC 2.4.1.90) (Nal synthase); Beta-N-acetylglucosaminylglycopeptide beta-1,4-galactosyltransferase (EC 2.4.1.38); Beta-N-acetylglucosaminy…	B4GALT3	Bos taurus (Bovine)	SUBCELLULAR LOCATION: Golgi apparatus, Golgi stack membrane {ECO:0000250}; Single-pass type II membrane protein {ECO:0000250}. Note=Trans cisternae of Golgi stack. {ECO:0000250}.	COFACTOR: Name=Mn(2+); Xref=ChEBI:CHEBI:29035; Evidence={ECO:0000250};	METAL 200 200 Manganese. {ECO:0000250}.; METAL 294 294 Manganese; via tele nitrogen. {ECO:0000250}.	Q5EA87;
Q80WN8	2.4.1.-; 2.4.1.90; 2.4.1.38; 2.4.1.-	BINDING 228 228 UDP-alpha-D-galactose. {ECO:0000250}.; BINDING 260 260 UDP-alpha-D-galactose. {ECO:0000250}.; BINDING 305 305 N-acetyl-D-glucosamine. {ECO:0000250}.	Beta-1,4-galactosyltransferase 3 (Beta-1,4-GalTase 3) (Beta4Gal-T3) (b4Gal-T3) (EC 2.4.1.-) (UDP-Gal:beta-GlcNAc beta-1,4-galactosyltransferase 3) (UDP-galactose:beta-N-acetylglucosamine beta-1,4-galactosyltransferase 3) [Includes: N-acetyllactosamine synthase (EC 2.4.1.90) (Nal synthase); Beta-N-acetylglucosaminylglycopeptide beta-1,4-galactosyltransferase (EC 2.4.1.38); Beta-N-acetylglucosaminy…	B4GALT3	Cricetulus griseus (Chinese hamster) (Cricetulus barabensis griseus)	SUBCELLULAR LOCATION: Golgi apparatus, Golgi stack membrane {ECO:0000250}; Single-pass type II membrane protein {ECO:0000250}. Note=Trans cisternae of Golgi stack. {ECO:0000250}.	COFACTOR: Name=Mn(2+); Xref=ChEBI:CHEBI:29035; Evidence={ECO:0000250};	METAL 199 199 Manganese. {ECO:0000250}.; METAL 293 293 Manganese; via tele nitrogen. {ECO:0000250}.	Q80WN8;
O60512	2.4.1.-; 2.4.1.90; 2.4.1.38; 2.4.1.-	BINDING 226 226 UDP-alpha-D-galactose. {ECO:0000250}.; BINDING 258 258 UDP-alpha-D-galactose. {ECO:0000250}.; BINDING 303 303 N-acetyl-D-glucosamine. {ECO:0000250}.	Beta-1,4-galactosyltransferase 3 (Beta-1,4-GalTase 3) (Beta4Gal-T3) (b4Gal-T3) (EC 2.4.1.-) (UDP-Gal:beta-GlcNAc beta-1,4-galactosyltransferase 3) (UDP-galactose:beta-N-acetylglucosamine beta-1,4-galactosyltransferase 3) [Includes: N-acetyllactosamine synthase (EC 2.4.1.90) (Nal synthase); Beta-N-acetylglucosaminylglycopeptide beta-1,4-galactosyltransferase (EC 2.4.1.38); Beta-N-acetylglucosaminy…	B4GALT3	Homo sapiens (Human)	SUBCELLULAR LOCATION: Golgi apparatus, Golgi stack membrane; Single-pass type II membrane protein. Note=Trans cisternae of Golgi stack.	COFACTOR: Name=Mn(2+); Xref=ChEBI:CHEBI:29035; Evidence={ECO:0000250};	METAL 197 197 Manganese. {ECO:0000250}.; METAL 291 291 Manganese; via tele nitrogen. {ECO:0000250}.	O60512;
Q91YY2	2.4.1.-; 2.4.1.90; 2.4.1.38; 2.4.1.-	BINDING 228 228 UDP-alpha-D-galactose. {ECO:0000250}.; BINDING 260 260 UDP-alpha-D-galactose. {ECO:0000250}.; BINDING 305 305 N-acetyl-D-glucosamine. {ECO:0000250}.	Beta-1,4-galactosyltransferase 3 (Beta-1,4-GalTase 3) (Beta4Gal-T3) (b4Gal-T3) (EC 2.4.1.-) (UDP-Gal:beta-GlcNAc beta-1,4-galactosyltransferase 3) (UDP-galactose:beta-N-acetylglucosamine beta-1,4-galactosyltransferase 3) [Includes: N-acetyllactosamine synthase (EC 2.4.1.90) (Nal synthase); Beta-N-acetylglucosaminylglycopeptide beta-1,4-galactosyltransferase (EC 2.4.1.38); Beta-N-acetylglucosaminy…	B4galt3	Mus musculus (Mouse)	SUBCELLULAR LOCATION: Golgi apparatus, Golgi stack membrane {ECO:0000250}; Single-pass type II membrane protein {ECO:0000250}. Note=Trans cisternae of Golgi stack. {ECO:0000250}.	COFACTOR: Name=Mn(2+); Xref=ChEBI:CHEBI:29035; Evidence={ECO:0000250};	METAL 199 199 Manganese. {ECO:0000250}.; METAL 293 293 Manganese; via tele nitrogen. {ECO:0000250}.	Q91YY2;
Q5NVN3	2.4.1.-; 2.4.1.90; 2.4.1.38; 2.4.1.-	BINDING 226 226 UDP-alpha-D-galactose. {ECO:0000250}.; BINDING 258 258 UDP-alpha-D-galactose. {ECO:0000250}.; BINDING 303 303 N-acetyl-D-glucosamine. {ECO:0000250}.	Beta-1,4-galactosyltransferase 3 (Beta-1,4-GalTase 3) (Beta4Gal-T3) (b4Gal-T3) (EC 2.4.1.-) (UDP-Gal:beta-GlcNAc beta-1,4-galactosyltransferase 3) (UDP-galactose:beta-N-acetylglucosamine beta-1,4-galactosyltransferase 3) [Includes: N-acetyllactosamine synthase (EC 2.4.1.90) (Nal synthase); Beta-N-acetylglucosaminylglycopeptide beta-1,4-galactosyltransferase (EC 2.4.1.38); Beta-N-acetylglucosaminy…	B4GALT3	Pongo abelii (Sumatran orangutan) (Pongo pygmaeus abelii)	SUBCELLULAR LOCATION: Golgi apparatus, Golgi stack membrane {ECO:0000250}; Single-pass type II membrane protein {ECO:0000250}. Note=Trans cisternae of Golgi stack. {ECO:0000250}.	COFACTOR: Name=Mn(2+); Xref=ChEBI:CHEBI:29035; Evidence={ECO:0000250};	METAL 197 197 Manganese. {ECO:0000250}.; METAL 291 291 Manganese; via tele nitrogen. {ECO:0000250}.	Q5NVN3;
Q6P768	2.4.1.-; 2.4.1.90; 2.4.1.38; 2.4.1.-	BINDING 228 228 UDP-alpha-D-galactose. {ECO:0000250}.; BINDING 260 260 UDP-alpha-D-galactose. {ECO:0000250}.; BINDING 305 305 N-acetyl-D-glucosamine. {ECO:0000250}.	Beta-1,4-galactosyltransferase 3 (Beta-1,4-GalTase 3) (Beta4Gal-T3) (b4Gal-T3) (EC 2.4.1.-) (UDP-Gal:beta-GlcNAc beta-1,4-galactosyltransferase 3) (UDP-galactose:beta-N-acetylglucosamine beta-1,4-galactosyltransferase 3) [Includes: N-acetyllactosamine synthase (EC 2.4.1.90) (Nal synthase); Beta-N-acetylglucosaminylglycopeptide beta-1,4-galactosyltransferase (EC 2.4.1.38); Beta-N-acetylglucosaminy…	B4galt3	Rattus norvegicus (Rat)	SUBCELLULAR LOCATION: Golgi apparatus, Golgi stack membrane {ECO:0000250}; Single-pass type II membrane protein {ECO:0000250}. Note=Trans cisternae of Golgi stack. {ECO:0000250}.	COFACTOR: Name=Mn(2+); Xref=ChEBI:CHEBI:29035; Evidence={ECO:0000250};	METAL 199 199 Manganese. {ECO:0000250}.; METAL 293 293 Manganese; via tele nitrogen. {ECO:0000250}.	Q6P768;
Q80WN7	2.4.1.-; 2.4.1.90; 2.4.1.275	BINDING 224 224 UDP-alpha-D-galactose. {ECO:0000250}.; BINDING 256 256 UDP-alpha-D-galactose. {ECO:0000250}.; BINDING 301 301 N-acetyl-D-glucosamine. {ECO:0000250}.	Beta-1,4-galactosyltransferase 4 (Beta-1,4-GalTase 4) (Beta4Gal-T4) (b4Gal-T4) (EC 2.4.1.-) (UDP-Gal:beta-GlcNAc beta-1,4-galactosyltransferase 4) (UDP-galactose:beta-N-acetylglucosamine beta-1,4-galactosyltransferase 4) [Includes: N-acetyllactosamine synthase (EC 2.4.1.90) (Nal synthase); Lactotriaosylceramide beta-1,4-galactosyltransferase (EC 2.4.1.275) (Beta-N-acetylglucosaminyl-glycolipid be…	B4GALT4	Cricetulus griseus (Chinese hamster) (Cricetulus barabensis griseus)	SUBCELLULAR LOCATION: Golgi apparatus, Golgi stack membrane {ECO:0000250}; Single-pass type II membrane protein {ECO:0000250}. Note=Trans cisternae of Golgi stack. {ECO:0000250}.	COFACTOR: Name=Mn(2+); Xref=ChEBI:CHEBI:29035; Evidence={ECO:0000250};	METAL 196 196 Manganese. {ECO:0000250}.; METAL 289 289 Manganese; via tele nitrogen. {ECO:0000250}.	Q80WN7;
O60513	2.4.1.-; 2.4.1.90; 2.4.1.275	BINDING 224 224 UDP-alpha-D-galactose. {ECO:0000250}.; BINDING 256 256 UDP-alpha-D-galactose. {ECO:0000250}.; BINDING 301 301 N-acetyl-D-glucosamine. {ECO:0000250}.	Beta-1,4-galactosyltransferase 4 (Beta-1,4-GalTase 4) (Beta4Gal-T4) (b4Gal-T4) (EC 2.4.1.-) (UDP-Gal:beta-GlcNAc beta-1,4-galactosyltransferase 4) (UDP-galactose:beta-N-acetylglucosamine beta-1,4-galactosyltransferase 4) [Includes: N-acetyllactosamine synthase (EC 2.4.1.90) (Nal synthase); Lactotriaosylceramide beta-1,4-galactosyltransferase (EC 2.4.1.275) (Beta-N-acetylglucosaminyl-glycolipid be…	B4GALT4 UNQ552/PRO1109	Homo sapiens (Human)	SUBCELLULAR LOCATION: Golgi apparatus, Golgi stack membrane; Single-pass type II membrane protein. Note=Trans cisternae of Golgi stack.	COFACTOR: Name=Mn(2+); Xref=ChEBI:CHEBI:29035; Evidence={ECO:0000250};	METAL 196 196 Manganese. {ECO:0000250}.; METAL 289 289 Manganese; via tele nitrogen. {ECO:0000250}.	O60513;
Q9JJ04	2.4.1.-; 2.4.1.90; 2.4.1.275	BINDING 224 224 UDP-alpha-D-galactose. {ECO:0000250}.; BINDING 256 256 UDP-alpha-D-galactose. {ECO:0000250}.; BINDING 301 301 N-acetyl-D-glucosamine. {ECO:0000250}.	Beta-1,4-galactosyltransferase 4 (Beta-1,4-GalTase 4) (Beta4Gal-T4) (b4Gal-T4) (EC 2.4.1.-) (UDP-Gal:beta-GlcNAc beta-1,4-galactosyltransferase 4) (UDP-galactose:beta-N-acetylglucosamine beta-1,4-galactosyltransferase 4) [Includes: N-acetyllactosamine synthase (EC 2.4.1.90) (Nal synthase); Lactotriaosylceramide beta-1,4-galactosyltransferase (EC 2.4.1.275) (Beta-N-acetylglucosaminyl-glycolipid be…	B4galt4	Mus musculus (Mouse)	SUBCELLULAR LOCATION: Golgi apparatus, Golgi stack membrane {ECO:0000250}; Single-pass type II membrane protein {ECO:0000250}. Note=Trans cisternae of Golgi stack. {ECO:0000250}.	COFACTOR: Name=Mn(2+); Xref=ChEBI:CHEBI:29035; Evidence={ECO:0000250};	METAL 196 196 Manganese. {ECO:0000250}.; METAL 289 289 Manganese; via tele nitrogen. {ECO:0000250}.	Q9JJ04;
Q66HH1	2.4.1.-; 2.4.1.90; 2.4.1.275	BINDING 224 224 UDP-alpha-D-galactose. {ECO:0000250}.; BINDING 256 256 UDP-alpha-D-galactose. {ECO:0000250}.; BINDING 301 301 N-acetyl-D-glucosamine. {ECO:0000250}.	Beta-1,4-galactosyltransferase 4 (Beta-1,4-GalTase 4) (Beta4Gal-T4) (b4Gal-T4) (EC 2.4.1.-) (UDP-Gal:beta-GlcNAc beta-1,4-galactosyltransferase 4) (UDP-galactose:beta-N-acetylglucosamine beta-1,4-galactosyltransferase 4) [Includes: N-acetyllactosamine synthase (EC 2.4.1.90) (Nal synthase); Lactotriaosylceramide beta-1,4-galactosyltransferase (EC 2.4.1.275) (Beta-N-acetylglucosaminyl-glycolipid be…	B4galt4	Rattus norvegicus (Rat)	SUBCELLULAR LOCATION: Golgi apparatus, Golgi stack membrane {ECO:0000250}; Single-pass type II membrane protein {ECO:0000250}. Note=Trans cisternae of Golgi stack. {ECO:0000250}.	COFACTOR: Name=Mn(2+); Xref=ChEBI:CHEBI:29035; Evidence={ECO:0000250};	METAL 196 196 Manganese. {ECO:0000250}.; METAL 289 289 Manganese; via tele nitrogen. {ECO:0000250}.	Q66HH1;
O43286	2.4.1.-	BINDING 264 264 UDP-alpha-D-galactose. {ECO:0000250}.; BINDING 296 296 UDP-alpha-D-galactose. {ECO:0000250}.; BINDING 340 340 N-acetyl-D-glucosamine. {ECO:0000250}.	Beta-1,4-galactosyltransferase 5 (Beta-1,4-GalTase 5) (Beta4Gal-T5) (b4Gal-T5) (EC 2.4.1.-) (Beta-1,4-GalT II) (UDP-Gal:beta-GlcNAc beta-1,4-galactosyltransferase 5) (UDP-galactose:beta-N-acetylglucosamine beta-1,4-galactosyltransferase 5)	B4GALT5	Homo sapiens (Human)	SUBCELLULAR LOCATION: Golgi apparatus, Golgi stack membrane; Single-pass type II membrane protein. Note=Trans cisternae of Golgi stack.	COFACTOR: Name=Mn(2+); Xref=ChEBI:CHEBI:29035; Evidence={ECO:0000250};	METAL 236 236 Manganese. {ECO:0000250}.; METAL 329 329 Manganese; via tele nitrogen. {ECO:0000250}.	O43286;
Q9JMK0	2.4.1.-	BINDING 264 264 UDP-alpha-D-galactose. {ECO:0000250}.; BINDING 296 296 UDP-alpha-D-galactose. {ECO:0000250}.; BINDING 340 340 N-acetyl-D-glucosamine. {ECO:0000250}.	Beta-1,4-galactosyltransferase 5 (Beta-1,4-GalTase 5) (Beta4Gal-T5) (b4Gal-T5) (EC 2.4.1.-) (Beta-1,4-GalT II) (UDP-Gal:beta-GlcNAc beta-1,4-galactosyltransferase 5) (UDP-galactose:beta-N-acetylglucosamine beta-1,4-galactosyltransferase 5)	B4galt5 Bgt-5	Mus musculus (Mouse)	SUBCELLULAR LOCATION: Golgi apparatus, Golgi stack membrane {ECO:0000250}; Single-pass type II membrane protein {ECO:0000250}. Note=Trans cisternae of Golgi stack. {ECO:0000250}.	COFACTOR: Name=Mn(2+); Xref=ChEBI:CHEBI:29035; Evidence={ECO:0000250};	METAL 236 236 Manganese. {ECO:0000250}.; METAL 329 329 Manganese; via tele nitrogen. {ECO:0000250}.	Q9JMK0;
Q9UBX8	2.4.1.-; 2.4.1.274	BINDING 258 258 UDP-alpha-D-galactose. {ECO:0000250}.; BINDING 290 290 UDP-alpha-D-galactose. {ECO:0000250}.; BINDING 334 334 N-acetyl-D-glucosamine. {ECO:0000250}.	Beta-1,4-galactosyltransferase 6 (Beta-1,4-GalTase 6) (Beta4Gal-T6) (b4Gal-T6) (EC 2.4.1.-) (UDP-Gal:beta-GlcNAc beta-1,4-galactosyltransferase 6) (UDP-galactose:beta-N-acetylglucosamine beta-1,4-galactosyltransferase 6) [Includes: Glucosylceramide beta-1,4-galactosyltransferase (EC 2.4.1.274) (Lactosylceramide synthase) (LacCer synthase) (UDP-Gal:glucosylceramide beta-1,4-galactosyltransferase)]	B4GALT6	Homo sapiens (Human)	SUBCELLULAR LOCATION: Golgi apparatus, Golgi stack membrane; Single-pass type II membrane protein. Note=Trans cisternae of Golgi stack.	COFACTOR: Name=Mn(2+); Xref=ChEBI:CHEBI:29035; Evidence={ECO:0000269|PubMed:3099851}; Name=Mg(2+); Xref=ChEBI:CHEBI:18420; Evidence={ECO:0000269|PubMed:3099851};	METAL 230 230 Manganese. {ECO:0000250}.; METAL 323 323 Manganese; via tele nitrogen. {ECO:0000250}.	Q9UBX8;
Q9WVK5	2.4.1.-; 2.4.1.274	BINDING 258 258 UDP-alpha-D-galactose. {ECO:0000250}.; BINDING 290 290 UDP-alpha-D-galactose. {ECO:0000250}.; BINDING 334 334 N-acetyl-D-glucosamine. {ECO:0000250}.	Beta-1,4-galactosyltransferase 6 (Beta-1,4-GalTase 6) (Beta4Gal-T6) (b4Gal-T6) (EC 2.4.1.-) (UDP-Gal:beta-GlcNAc beta-1,4-galactosyltransferase 6) (UDP-galactose:beta-N-acetylglucosamine beta-1,4-galactosyltransferase 6) [Includes: Glucosylceramide beta-1,4-galactosyltransferase (EC 2.4.1.274) (Lactosylceramide synthase) (LacCer synthase) (UDP-Gal:glucosylceramide beta-1,4-galactosyltransferase)]	B4galt6	Mus musculus (Mouse)	SUBCELLULAR LOCATION: Golgi apparatus, Golgi stack membrane {ECO:0000250}; Single-pass type II membrane protein {ECO:0000250}. Note=Trans cisternae of Golgi stack. {ECO:0000250}.	COFACTOR: Name=Mn(2+); Xref=ChEBI:CHEBI:29035; Evidence={ECO:0000250}; Name=Mg(2+); Xref=ChEBI:CHEBI:18420; Evidence={ECO:0000250}; Name=Ca(2+); Xref=ChEBI:CHEBI:29108; Evidence={ECO:0000250};	METAL 230 230 Manganese. {ECO:0000250}.; METAL 323 323 Manganese; via tele nitrogen. {ECO:0000250}.	Q9WVK5;
O88419	2.4.1.-; 2.4.1.274	BINDING 258 258 UDP-alpha-D-galactose. {ECO:0000250}.; BINDING 290 290 UDP-alpha-D-galactose. {ECO:0000250}.; BINDING 334 334 N-acetyl-D-glucosamine. {ECO:0000250}.	Beta-1,4-galactosyltransferase 6 (Beta-1,4-GalTase 6) (Beta4Gal-T6) (b4Gal-T6) (EC 2.4.1.-) (UDP-Gal:beta-GlcNAc beta-1,4-galactosyltransferase 6) (UDP-galactose:beta-N-acetylglucosamine beta-1,4-galactosyltransferase 6) [Includes: Glucosylceramide beta-1,4-galactosyltransferase (EC 2.4.1.274) (Lactosylceramide synthase) (LacCer synthase) (UDP-Gal:glucosylceramide beta-1,4-galactosyltransferase)]	B4galt6	Rattus norvegicus (Rat)	SUBCELLULAR LOCATION: Golgi apparatus, Golgi stack membrane {ECO:0000250}; Single-pass type II membrane protein {ECO:0000250}. Note=Trans cisternae of Golgi stack. {ECO:0000250}.	COFACTOR: Name=Mn(2+); Xref=ChEBI:CHEBI:29035; Evidence={ECO:0000269|PubMed:9593693}; Name=Mg(2+); Xref=ChEBI:CHEBI:18420; Evidence={ECO:0000269|PubMed:9593693}; Name=Ca(2+); Xref=ChEBI:CHEBI:29108; Evidence={ECO:0000269|PubMed:9593693};	METAL 230 230 Manganese. {ECO:0000250}.; METAL 323 323 Manganese; via tele nitrogen. {ECO:0000250}.	O88419;
Q9UBV7	2.4.1.-; 2.4.1.133	BINDING 194 194 UDP-alpha-D-galactose. {ECO:0000269|PubMed:24052259}.; BINDING 224 224 UDP-alpha-D-galactose. {ECO:0000269|PubMed:24052259}.; BINDING 266 266 UDP-alpha-D-galactose. {ECO:0000269|PubMed:24052259}.	Beta-1,4-galactosyltransferase 7 (Beta-1,4-GalTase 7) (Beta4Gal-T7) (b4Gal-T7) (EC 2.4.1.-) (UDP-Gal:beta-GlcNAc beta-1,4-galactosyltransferase 7) (UDP-galactose:beta-N-acetylglucosamine beta-1,4-galactosyltransferase 7) [Includes: Xylosylprotein 4-beta-galactosyltransferase (EC 2.4.1.133) (Proteoglycan UDP-galactose:beta-xylose beta1,4-galactosyltransferase I) (UDP-galactose:beta-xylose beta-1,4…	B4GALT7 XGALT1 UNQ748/PRO1478	Homo sapiens (Human)	SUBCELLULAR LOCATION: Golgi apparatus, Golgi stack membrane; Single-pass type II membrane protein. Note=Cis cisternae of Golgi stack.	COFACTOR: Name=Mn(2+); Xref=ChEBI:CHEBI:29035; Evidence={ECO:0000269|PubMed:24052259};	METAL 165 165 Manganese.; METAL 257 257 Manganese; via tele nitrogen.	Q9UBV7;
Q8R087	2.4.1.-; 2.4.1.133	BINDING 194 194 UDP-alpha-D-galactose. {ECO:0000250}.; BINDING 224 224 UDP-alpha-D-galactose. {ECO:0000250}.; BINDING 266 266 UDP-alpha-D-galactose. {ECO:0000250}.	Beta-1,4-galactosyltransferase 7 (Beta-1,4-GalTase 7) (Beta4Gal-T7) (b4Gal-T7) (EC 2.4.1.-) (UDP-Gal:beta-GlcNAc beta-1,4-galactosyltransferase 7) (UDP-galactose:beta-N-acetylglucosamine beta-1,4-galactosyltransferase 7) [Includes: Xylosylprotein 4-beta-galactosyltransferase (EC 2.4.1.133) (Proteoglycan UDP-galactose:beta-xylose beta1,4-galactosyltransferase I) (UDP-galactose:beta-xylose beta-1,4…	B4galt7 Xgalt1	Mus musculus (Mouse)	SUBCELLULAR LOCATION: Golgi apparatus, Golgi stack membrane {ECO:0000250}; Single-pass type II membrane protein {ECO:0000250}. Note=Cis cisternae of Golgi stack. {ECO:0000250}.	COFACTOR: Name=Mn(2+); Xref=ChEBI:CHEBI:29035; Evidence={ECO:0000250};	METAL 165 165 Manganese. {ECO:0000250}.; METAL 257 257 Manganese; via tele nitrogen. {ECO:0000250}.	Q8R087;
Q2HJ40	3.4.23.46		Beta-secretase 1 (EC 3.4.23.46) (Beta-site amyloid precursor protein cleaving enzyme 1) (Beta-site APP cleaving enzyme 1) (Memapsin-2) (Membrane-associated aspartic protease 2)	BACE1	Bos taurus (Bovine)	SUBCELLULAR LOCATION: Membrane; Single-pass type I membrane protein. Golgi apparatus, trans-Golgi network {ECO:0000250}. Endoplasmic reticulum {ECO:0000250}. Endosome {ECO:0000250}. Cell surface {ECO:0000250}. Cytoplasmic vesicle membrane {ECO:0000250}. Note=Predominantly localized to the later Golgi/trans-Golgi network (TGN) and minimally detectable in the early Golgi compartments. A small porti…			Q2HJ40;
Q1KLR6	3.4.23.46		Beta-secretase 1 (EC 3.4.23.46) (Beta-site amyloid precursor protein cleaving enzyme 1) (Beta-site APP cleaving enzyme 1) (Memapsin-2) (Membrane-associated aspartic protease 2)	BACE1	Cavia porcellus (Guinea pig)	SUBCELLULAR LOCATION: Membrane; Single-pass type I membrane protein. Golgi apparatus, trans-Golgi network {ECO:0000250}. Endoplasmic reticulum {ECO:0000250}. Endosome {ECO:0000250}. Cell surface {ECO:0000250}. Cytoplasmic vesicle membrane {ECO:0000250}. Note=Predominantly localized to the later Golgi/trans-Golgi network (TGN) and minimally detectable in the early Golgi compartments. A small porti…			Q1KLR6;
P56817	3.4.23.46		Beta-secretase 1 (EC 3.4.23.46) (Aspartyl protease 2) (ASP2) (Asp 2) (Beta-site amyloid precursor protein cleaving enzyme 1) (Beta-site APP cleaving enzyme 1) (Memapsin-2) (Membrane-associated aspartic protease 2)	BACE1 BACE KIAA1149	Homo sapiens (Human)	SUBCELLULAR LOCATION: Membrane; Single-pass type I membrane protein. Golgi apparatus, trans-Golgi network. Endoplasmic reticulum. Endosome. Cell surface. Cytoplasmic vesicle membrane. Note=Predominantly localized to the later Golgi/trans-Golgi network (TGN) and minimally detectable in the early Golgi compartments. A small portion is also found in the endoplasmic reticulum, endosomes and on the ce…			P56817;
P56818	3.4.23.46		Beta-secretase 1 (EC 3.4.23.46) (Aspartyl protease 2) (ASP2) (Asp 2) (Beta-site amyloid precursor protein cleaving enzyme 1) (Beta-site APP cleaving enzyme 1) (Memapsin-2) (Membrane-associated aspartic protease 2)	Bace1 Bace	Mus musculus (Mouse)	SUBCELLULAR LOCATION: Membrane; Single-pass type I membrane protein. Golgi apparatus, trans-Golgi network {ECO:0000250}. Endoplasmic reticulum {ECO:0000250}. Endosome {ECO:0000250}. Cell surface {ECO:0000250}. Cytoplasmic vesicle membrane {ECO:0000250}. Note=Predominantly localized to the later Golgi/trans-Golgi network (TGN) and minimally detectable in the early Golgi compartments. A small porti…			P56818;
P56819	3.4.23.46		Beta-secretase 1 (EC 3.4.23.46) (Aspartyl protease 2) (ASP2) (Asp 2) (Beta-site amyloid precursor protein cleaving enzyme 1) (Beta-site APP cleaving enzyme 1) (Memapsin-2) (Membrane-associated aspartic protease 2)	Bace1 Bace	Rattus norvegicus (Rat)	SUBCELLULAR LOCATION: Membrane; Single-pass type I membrane protein. Golgi apparatus, trans-Golgi network {ECO:0000250}. Endoplasmic reticulum {ECO:0000250}. Endosome {ECO:0000250}. Cell surface {ECO:0000250}. Cytoplasmic vesicle membrane {ECO:0000250}. Note=Predominantly localized to the later Golgi/trans-Golgi network (TGN) and minimally detectable in the early Golgi compartments. A small porti…			P56819;
Q9Y5Z0	3.4.23.45		Beta-secretase 2 (EC 3.4.23.45) (Aspartic-like protease 56 kDa) (Aspartyl protease 1) (ASP1) (Asp 1) (Beta-site amyloid precursor protein cleaving enzyme 2) (Beta-site APP cleaving enzyme 2) (Down region aspartic protease) (DRAP) (Memapsin-1) (Membrane-associated aspartic protease 1) (Theta-secretase)	BACE2 AEPLC ALP56 ASP21 CDA13 UNQ418/PRO852	Homo sapiens (Human)	SUBCELLULAR LOCATION: Membrane; Single-pass type I membrane protein. Golgi apparatus. Endoplasmic reticulum. Endosome. Cell surface.			Q9Y5Z0;
Q9JL18	3.4.23.45		Beta-secretase 2 (EC 3.4.23.45) (Aspartyl protease 1) (ASP1) (Asp 1) (Beta-site amyloid precursor protein cleaving enzyme 2) (Beta-site APP cleaving enzyme 2) (Memapsin-1) (Membrane-associated aspartic protease 1) (Theta-secretase)	Bace2	Mus musculus (Mouse)	SUBCELLULAR LOCATION: Membrane {ECO:0000250}; Single-pass type I membrane protein {ECO:0000250}. Golgi apparatus {ECO:0000250}. Endoplasmic reticulum {ECO:0000250}. Endosome {ECO:0000250}. Cell surface {ECO:0000250}.			Q9JL18;
Q6IE75	3.4.23.45		Beta-secretase 2 (EC 3.4.23.45) (Beta-site amyloid precursor protein cleaving enzyme 2) (Beta-site APP cleaving enzyme 2) (Memapsin-1) (Membrane-associated aspartic protease 1) (Theta-secretase)	Bace2	Rattus norvegicus (Rat)	SUBCELLULAR LOCATION: Membrane {ECO:0000250}; Single-pass type I membrane protein {ECO:0000250}. Golgi apparatus {ECO:0000250}. Endoplasmic reticulum {ECO:0000250}. Endosome {ECO:0000250}. Cell surface {ECO:0000250}.			Q6IE75;
Q09323	2.4.1.-		Beta-N-acetyl-D-glucosaminide beta-1,4-N-acetylglucosaminyl-transferase (EC 2.4.1.-) (Beta-1,4-GlcNAcT) (UDP-GlcNAc:GlcNAc beta-R beta-1,4-N-acetylglucosaminyl-transferase)	GNT	Lymnaea stagnalis (Great pond snail) (Helix stagnalis)	SUBCELLULAR LOCATION: Golgi apparatus membrane; Single-pass type II membrane protein.			Q09323;
Q94F62	2.7.10.1; 2.7.11.1	BINDING 317 317 ATP. {ECO:0000255|PROSITE-ProRule:PRU00159}.	BRASSINOSTEROID INSENSITIVE 1-associated receptor kinase 1 (AtBAK1) (BRI1-associated receptor kinase 1) (EC 2.7.10.1) (EC 2.7.11.1) (Protein ELONGATED) (Somatic embryogenesis receptor kinase 3) (AtSERK3) (Somatic embryogenesis receptor-like kinase 3)	BAK1 ELG SERK3 At4g33430 F17M5.190	Arabidopsis thaliana (Mouse-ear cress)	SUBCELLULAR LOCATION: Cell membrane; Single-pass type I membrane protein. Endosome membrane; Single-pass type I membrane protein. Note=Endocytosis enhanced upon interaction with MSBP1.			Q94F62;
O49545	2.7.11.1	BINDING 722 722 ATP. {ECO:0000255|PROSITE-ProRule:PRU00159}.	Leucine-rich repeat receptor-like serine/threonine-protein kinase BAM1 (EC 2.7.11.1) (Protein BARELY ANY MERISTEM 1)	BAM1 At5g65700 F6H11.170 MPA24.5	Arabidopsis thaliana (Mouse-ear cress)	SUBCELLULAR LOCATION: Cell membrane {ECO:0000269|PubMed:14506206, ECO:0000269|PubMed:20626648}; Single-pass type I membrane protein {ECO:0000269|PubMed:14506206, ECO:0000269|PubMed:20626648}.			O49545;
Q9M2Z1	2.7.11.1	BINDING 718 718 ATP. {ECO:0000255|PROSITE-ProRule:PRU00159}.	Leucine-rich repeat receptor-like serine/threonine-protein kinase BAM2 (EC 2.7.11.1) (Protein BARELY ANY MERISTEM 2)	BAM2 At3g49670 T16K5.20	Arabidopsis thaliana (Mouse-ear cress)	SUBCELLULAR LOCATION: Cell membrane {ECO:0000269|PubMed:20626648}; Single-pass type I membrane protein {ECO:0000269|PubMed:20626648}.			Q9M2Z1;
O65440	2.7.11.1	BINDING 738 738 ATP. {ECO:0000255|PROSITE-ProRule:PRU00159}.	Leucine-rich repeat receptor-like serine/threonine-protein kinase BAM3 (EC 2.7.11.1) (Protein BARELY ANY MERISTEM 3)	BAM3 At4g20270 F1C12.190	Arabidopsis thaliana (Mouse-ear cress)	SUBCELLULAR LOCATION: Cell membrane; Single-pass type I membrane protein.			O65440;
B5BSX1	1.14.13.134		Beta-amyrin 11-oxidase (EC 1.14.13.134) (Cytochrome P450 88D6)	CYP88D6	Glycyrrhiza uralensis (Chinese licorice) (Glycyrrhiza shiheziensis)	SUBCELLULAR LOCATION: Membrane {ECO:0000305}; Single-pass membrane protein {ECO:0000305}.	COFACTOR: Name=heme; Xref=ChEBI:CHEBI:30413; Evidence={ECO:0000250};	METAL 439 439 Iron (heme axial ligand). {ECO:0000250}.	B5BSX1;
Q9ET32	2.4.1.40; 2.4.1.37	BINDING 121 121 UDP-N-acetyl-galactosamine. {ECO:0000250}.; BINDING 228 228 Glycoprotein fucosyl-galactosyl group. {ECO:0000250}.; BINDING 240 240 Glycoprotein fucosyl-galactosyl group. {ECO:0000250}.; BINDING 298 298 Glycoprotein fucosyl-galactosyl group. {ECO:0000250}.; BINDING 321 321 Glycoprotein fucosyl-galactosyl group. {ECO:0000250}.	Histo-blood group ABO system transferase 1 (Blood group A glycosyltransferase 1) (Cis-AB transferase 1) (Fucosylglycoprotein 3-alpha-galactosyltransferase) (Fucosylglycoprotein alpha-N-acetylgalactosaminyltransferase) (Glycoprotein-fucosylgalactoside alpha-N-acetylgalactosaminyltransferase) (EC 2.4.1.40) (Glycoprotein-fucosylgalactoside alpha-galactosyltransferase) (EC 2.4.1.37) (Histo-blood grou…	Abo Abo1	Rattus norvegicus (Rat)	SUBCELLULAR LOCATION: Golgi apparatus, Golgi stack membrane; Single-pass type II membrane protein. Secreted. Note=Membrane-bound form in trans cisternae of Golgi. Secreted into the body fluid (By similarity). {ECO:0000250}.	COFACTOR: Name=Mn(2+); Xref=ChEBI:CHEBI:29035; Evidence={ECO:0000250}; ; Note=Binds 1 Mn(2+) ion per subunit. {ECO:0000250};	METAL 206 206 Manganese. {ECO:0000250}.; METAL 208 208 Manganese. {ECO:0000250}.	Q9ET32;
Q8CFC4	2.4.1.40; 2.4.1.37	BINDING 107 107 UDP-N-acetyl-galactosamine. {ECO:0000250}.; BINDING 214 214 Glycoprotein fucosyl-galactosyl group. {ECO:0000250}.; BINDING 226 226 Glycoprotein fucosyl-galactosyl group. {ECO:0000250}.; BINDING 284 284 Glycoprotein fucosyl-galactosyl group. {ECO:0000250}.; BINDING 307 307 Glycoprotein fucosyl-galactosyl group. {ECO:0000250}.	Histo-blood group ABO system transferase 2 (B blood group galactosyltransferase) (Blood group A glycosyltransferase 2) (Cis-AB transferase 2) (Fucosylglycoprotein 3-alpha-galactosyltransferase) (Fucosylglycoprotein alpha-N-acetylgalactosaminyltransferase) (Glycoprotein-fucosylgalactoside alpha-N-acetylgalactosaminyltransferase) (EC 2.4.1.40) (Glycoprotein-fucosylgalactoside alpha-galactosyltransf…	Abo2	Rattus norvegicus (Rat)	SUBCELLULAR LOCATION: Golgi apparatus, Golgi stack membrane; Single-pass type II membrane protein. Secreted. Note=Membrane-bound form in trans cisternae of Golgi. Secreted into the body fluid (By similarity). {ECO:0000250}.	COFACTOR: Name=Mn(2+); Xref=ChEBI:CHEBI:29035; Evidence={ECO:0000250}; ; Note=Binds 1 Mn(2+) ion per subunit. {ECO:0000250};	METAL 192 192 Manganese. {ECO:0000250}.; METAL 194 194 Manganese. {ECO:0000250}.	Q8CFC4;
P16442	2.4.1.40; 2.4.1.37	BINDING 126 126 UDP-N-acetyl-galactosamine.; BINDING 233 233 Glycoprotein fucosyl-galactosyl group.; BINDING 245 245 Glycoprotein fucosyl-galactosyl group.; BINDING 303 303 Glycoprotein fucosyl-galactosyl group.; BINDING 326 326 Glycoprotein fucosyl-galactosyl group.	Histo-blood group ABO system transferase (Fucosylglycoprotein 3-alpha-galactosyltransferase) (Fucosylglycoprotein alpha-N-acetylgalactosaminyltransferase) (Glycoprotein-fucosylgalactoside alpha-N-acetylgalactosaminyltransferase) (EC 2.4.1.40) (Glycoprotein-fucosylgalactoside alpha-galactosyltransferase) (EC 2.4.1.37) (Histo-blood group A transferase) (A transferase) (Histo-blood group B transfera…	ABO	Homo sapiens (Human)	SUBCELLULAR LOCATION: Golgi apparatus, Golgi stack membrane; Single-pass type II membrane protein. Secreted. Note=Membrane-bound form in trans cisternae of Golgi. Secreted into the body fluid.	COFACTOR: Name=Mn(2+); Xref=ChEBI:CHEBI:29035; Evidence={ECO:0000269|PubMed:17259183}; ; Note=Binds 1 Mn(2+) ion per subunit. {ECO:0000269|PubMed:17259183};	METAL 211 211 Manganese.; METAL 213 213 Manganese.	P16442;
P38649	2.4.1.40; 2.4.1.37	BINDING 105 105 UDP-N-acetyl-galactosamine. {ECO:0000250}.; BINDING 212 212 Glycoprotein fucosyl-galactosyl group. {ECO:0000250}.; BINDING 224 224 Glycoprotein fucosyl-galactosyl group. {ECO:0000250}.; BINDING 282 282 Glycoprotein fucosyl-galactosyl group. {ECO:0000250}.; BINDING 305 305 Glycoprotein fucosyl-galactosyl group. {ECO:0000250}.	Histo-blood group ABO system transferase (Cis-AB transferase) (Fucosylglycoprotein 3-alpha-galactosyltransferase) (Fucosylglycoprotein alpha-N-acetylgalactosaminyltransferase) (Glycoprotein-fucosylgalactoside alpha-N-acetylgalactosaminyltransferase) (EC 2.4.1.40) (Glycoprotein-fucosylgalactoside alpha-galactosyltransferase) (EC 2.4.1.37) (Histo-blood group A transferase) (A transferase) (Histo-bl…	Abo	Mus musculus (Mouse)	SUBCELLULAR LOCATION: Golgi apparatus, Golgi stack membrane; Single-pass type II membrane protein. Secreted. Note=Membrane-bound form in trans cisternae of Golgi. Secreted into the body fluid (By similarity). {ECO:0000250}.	COFACTOR: Name=Mn(2+); Xref=ChEBI:CHEBI:29035; Evidence={ECO:0000250}; ; Note=Binds 1 Mn(2+) ion per subunit. {ECO:0000250};	METAL 190 190 Manganese. {ECO:0000250}.; METAL 192 192 Manganese. {ECO:0000250}.	P38649;
A1CMH6	3.2.1.21		Probable beta-glucosidase E (EC 3.2.1.21) (Beta-D-glucoside glucohydrolase E) (Cellobiase E) (Gentiobiase E)	bglE ACLA_096980	Aspergillus clavatus (strain ATCC 1007 / CBS 513.65 / DSM 816 / NCTC 3887 / NRRL 1)	SUBCELLULAR LOCATION: Cell membrane {ECO:0000250}; Single-pass type II membrane protein {ECO:0000250}.			A1CMH6;
B0YD91	3.2.1.21		Probable beta-glucosidase E (EC 3.2.1.21) (Beta-D-glucoside glucohydrolase E) (Cellobiase E) (Gentiobiase E)	bglE AFUB_094720	Neosartorya fumigata (strain CEA10 / CBS 144.89 / FGSC A1163) (Aspergillus fumigatus)	SUBCELLULAR LOCATION: Cell membrane {ECO:0000250}; Single-pass type II membrane protein {ECO:0000250}.			B0YD91;
Q4WD56	3.2.1.21		Probable beta-glucosidase E (EC 3.2.1.21) (Beta-D-glucoside glucohydrolase E) (Cellobiase E) (Gentiobiase E)	bglE AFUA_6G03570	Neosartorya fumigata (strain ATCC MYA-4609 / Af293 / CBS 101355 / FGSC A1100) (Aspergillus fumigatus)	SUBCELLULAR LOCATION: Cell membrane {ECO:0000250}; Single-pass type II membrane protein {ECO:0000250}.			Q4WD56;
Q2UTX5	3.2.1.21		Probable beta-glucosidase E (EC 3.2.1.21) (Beta-D-glucoside glucohydrolase E) (Cellobiase E) (Gentiobiase E)	bglE AO090009000554	Aspergillus oryzae (strain ATCC 42149 / RIB 40) (Yellow koji mold)	SUBCELLULAR LOCATION: Cell membrane {ECO:0000250}; Single-pass type II membrane protein {ECO:0000250}.			Q2UTX5;
Q5AYH8	3.2.1.21		Probable beta-glucosidase E (EC 3.2.1.21) (Beta-D-glucoside glucohydrolase E) (Cellobiase E) (Gentiobiase E)	bglE AN6652	Emericella nidulans (strain FGSC A4 / ATCC 38163 / CBS 112.46 / NRRL 194 / M139) (Aspergillus nidulans)	SUBCELLULAR LOCATION: Cell membrane {ECO:0000250}; Single-pass type II membrane protein {ECO:0000250}.			Q5AYH8;
A1DLJ5	3.2.1.21		Probable beta-glucosidase E (EC 3.2.1.21) (Beta-D-glucoside glucohydrolase E) (Cellobiase E) (Gentiobiase E)	bglE NFIA_050080	Neosartorya fischeri (strain ATCC 1020 / DSM 3700 / FGSC A1164 / NRRL 181) (Aspergillus fischerianus)	SUBCELLULAR LOCATION: Cell membrane {ECO:0000250}; Single-pass type II membrane protein {ECO:0000250}.			A1DLJ5;
P51559	3.4.21.-		Endoprotease bli-4 (EC 3.4.21.-) (Blisterase) (Blistered cuticle protein 4)	bli-4 kpc-4 K04F10.4	Caenorhabditis elegans	SUBCELLULAR LOCATION: Membrane {ECO:0000305}; Single-pass membrane protein {ECO:0000305}.	COFACTOR: Name=Ca(2+); Xref=ChEBI:CHEBI:29108; Evidence={ECO:0000250};		P51559;
Q13873	2.7.11.30	BINDING 230 230 ATP.; BINDING 351 351 ATP.	Bone morphogenetic protein receptor type-2 (BMP type-2 receptor) (BMPR-2) (EC 2.7.11.30) (Bone morphogenetic protein receptor type II) (BMP type II receptor) (BMPR-II)	BMPR2 PPH1	Homo sapiens (Human)	SUBCELLULAR LOCATION: Membrane; Single-pass type I membrane protein.	COFACTOR: Name=Mg(2+); Xref=ChEBI:CHEBI:18420; Evidence={ECO:0000250}; Name=Mn(2+); Xref=ChEBI:CHEBI:29035; Evidence={ECO:0000250};		Q13873;
O35607	2.7.11.30	BINDING 230 230 ATP. {ECO:0000255|PROSITE-ProRule:PRU00159}.; BINDING 351 351 ATP. {ECO:0000255|PROSITE-ProRule:PRU00159}.	Bone morphogenetic protein receptor type-2 (BMP type-2 receptor) (BMPR-2) (EC 2.7.11.30) (BRK-3) (Bone morphogenetic protein receptor type II) (BMP type II receptor) (BMPR-II)	Bmpr2	Mus musculus (Mouse)	SUBCELLULAR LOCATION: Membrane; Single-pass type I membrane protein.	COFACTOR: Name=Mg(2+); Xref=ChEBI:CHEBI:18420; Evidence={ECO:0000250}; Name=Mn(2+); Xref=ChEBI:CHEBI:29035; Evidence={ECO:0000250};		O35607;
P36894	2.7.11.30	BINDING 261 261 ATP. {ECO:0000255|PROSITE-ProRule:PRU00159}.	Bone morphogenetic protein receptor type-1A (BMP type-1A receptor) (BMPR-1A) (EC 2.7.11.30) (Activin receptor-like kinase 3) (ALK-3) (Serine/threonine-protein kinase receptor R5) (SKR5) (CD antigen CD292)	BMPR1A ACVRLK3 ALK3	Homo sapiens (Human)	SUBCELLULAR LOCATION: Membrane; Single-pass type I membrane protein.	COFACTOR: Name=Mg(2+); Xref=ChEBI:CHEBI:18420; Evidence={ECO:0000250}; Name=Mn(2+); Xref=ChEBI:CHEBI:29035; Evidence={ECO:0000250};		P36894;
P36895	2.7.11.30	BINDING 261 261 ATP. {ECO:0000255|PROSITE-ProRule:PRU00159}.	Bone morphogenetic protein receptor type-1A (BMP type-1A receptor) (BMPR-1A) (EC 2.7.11.30) (Activin receptor-like kinase 3) (ALK-3) (BMP-2/BMP-4 receptor) (Serine/threonine-protein kinase receptor R5) (SKR5) (CD antigen CD292)	Bmpr1a Acvrlk3 Bmpr	Mus musculus (Mouse)	SUBCELLULAR LOCATION: Membrane; Single-pass type I membrane protein.	COFACTOR: Name=Mg(2+); Xref=ChEBI:CHEBI:18420; Evidence={ECO:0000250}; Name=Mn(2+); Xref=ChEBI:CHEBI:29035; Evidence={ECO:0000250};		P36895;
Q78EA7	2.7.11.30	BINDING 261 261 ATP. {ECO:0000255|PROSITE-ProRule:PRU00159}.	Bone morphogenetic protein receptor type-1A (BMP type-1A receptor) (BMPR-1A) (EC 2.7.11.30) (Activin receptor-like kinase 3) (ALK-3) (Bone morphogenetic protein 4 receptor) (CD antigen CD292)	Bmpr1a	Rattus norvegicus (Rat)	SUBCELLULAR LOCATION: Membrane; Single-pass type I membrane protein.	COFACTOR: Name=Mg(2+); Xref=ChEBI:CHEBI:18420; Evidence={ECO:0000250}; Name=Mn(2+); Xref=ChEBI:CHEBI:29035; Evidence={ECO:0000250};		Q78EA7;
Q05438	2.7.11.30	BINDING 231 231 ATP. {ECO:0000255|PROSITE-ProRule:PRU00159}.	Bone morphogenetic protein receptor type-1B (BMP type-1B receptor) (BMPR-1B) (EC 2.7.11.30) (Activin receptor-like kinase 6) (ALK-6) (RPK-1) (Serine/threonine-protein kinase receptor R6) (SKR6)	BMPR1B	Gallus gallus (Chicken)	SUBCELLULAR LOCATION: Membrane; Single-pass type I membrane protein.	COFACTOR: Name=Mg(2+); Xref=ChEBI:CHEBI:18420; Evidence={ECO:0000250}; Name=Mn(2+); Xref=ChEBI:CHEBI:29035; Evidence={ECO:0000250};		Q05438;
O00238	2.7.11.30	BINDING 231 231 ATP. {ECO:0000255|PROSITE-ProRule:PRU00159}.	Bone morphogenetic protein receptor type-1B (BMP type-1B receptor) (BMPR-1B) (EC 2.7.11.30) (CD antigen CDw293)	BMPR1B	Homo sapiens (Human)	SUBCELLULAR LOCATION: Membrane; Single-pass type I membrane protein.	COFACTOR: Name=Mg(2+); Xref=ChEBI:CHEBI:18420; Evidence={ECO:0000250}; Name=Mn(2+); Xref=ChEBI:CHEBI:29035; Evidence={ECO:0000250};		O00238;
P36898	2.7.11.30	BINDING 231 231 ATP. {ECO:0000255|PROSITE-ProRule:PRU00159}.	Bone morphogenetic protein receptor type-1B (BMP type-1B receptor) (BMPR-1B) (EC 2.7.11.30) (Activin receptor-like kinase 6) (ALK-6) (Serine/threonine-protein kinase receptor R6) (SKR6) (CD antigen CDw293)	Bmpr1b Acvrlk6	Mus musculus (Mouse)	SUBCELLULAR LOCATION: Membrane; Single-pass type I membrane protein.	COFACTOR: Name=Mg(2+); Xref=ChEBI:CHEBI:18420; Evidence={ECO:0000250}; Name=Mn(2+); Xref=ChEBI:CHEBI:29035; Evidence={ECO:0000250};		P36898;
Q5ADQ9	2.4.1.-		Beta-mannosyltransferase 1 (EC 2.4.1.-) (WRY family protein 4)	BMT1 IFQ2 WRY4 CaO19.14074 CaO19.6782	Candida albicans (strain SC5314 / ATCC MYA-2876) (Yeast)	SUBCELLULAR LOCATION: Membrane {ECO:0000305}; Single-pass type II membrane protein {ECO:0000305}.
F2QZ65	2.4.1.-		Beta-mannosyltransferase 1 (EC 2.4.1.-)	BMT1 PP7435_Chr4-0529	Komagataella pastoris (strain ATCC 76273 / CBS 7435 / CECT 11047 / NRRL Y-11430 / Wegner 21-1) (Yeast) (Pichia pastoris)	SUBCELLULAR LOCATION: Membrane {ECO:0000305}; Single-pass type II membrane protein {ECO:0000305}.
C4R7X9	2.4.1.-		Beta-mannosyltransferase 1 (EC 2.4.1.-)	BMT1 PAS_chr4_0451	Komagataella pastoris (strain GS115 / ATCC 20864) (Yeast) (Pichia pastoris)	SUBCELLULAR LOCATION: Membrane {ECO:0000305}; Single-pass type II membrane protein {ECO:0000305}.
Q59MA6	2.4.1.-		Beta-mannosyltransferase 2 (EC 2.4.1.-) (Repressed during hyphae development protein 1) (WRY family protein 7)	RHD1 BMT2 IFQ3 WRY7 CaO19.54 CaO19.7715	Candida albicans (strain SC5314 / ATCC MYA-2876) (Yeast)	SUBCELLULAR LOCATION: Membrane {ECO:0000305}; Single-pass type II membrane protein {ECO:0000305}.
F2QZ66	2.4.1.-		Beta-mannosyltransferase 2 (EC 2.4.1.-)	BMT2 PP7435_Chr4-0530	Komagataella pastoris (strain ATCC 76273 / CBS 7435 / CECT 11047 / NRRL Y-11430 / Wegner 21-1) (Yeast) (Pichia pastoris)	SUBCELLULAR LOCATION: Membrane {ECO:0000305}; Single-pass type II membrane protein {ECO:0000305}.
C4R7X8	2.4.1.-		Beta-mannosyltransferase 2 (EC 2.4.1.-)	BMT2 PAS_chr4_0450	Komagataella pastoris (strain GS115 / ATCC 20864) (Yeast) (Pichia pastoris)	SUBCELLULAR LOCATION: Membrane {ECO:0000305}; Single-pass type II membrane protein {ECO:0000305}.
Q5A846	2.4.1.-		Beta-mannosyltransferase 3 (EC 2.4.1.-) (WRY family protein 9)	BMT3 WRY9 CaO19.10792 CaO19.3282	Candida albicans (strain SC5314 / ATCC MYA-2876) (Yeast)	SUBCELLULAR LOCATION: Membrane {ECO:0000305}; Single-pass type II membrane protein {ECO:0000305}.
F2QQ67	2.4.1.-		Beta-mannosyltransferase 3 (EC 2.4.1.-)	BMT3 PP7435_Chr1-1431	Komagataella pastoris (strain ATCC 76273 / CBS 7435 / CECT 11047 / NRRL Y-11430 / Wegner 21-1) (Yeast) (Pichia pastoris)	SUBCELLULAR LOCATION: Membrane {ECO:0000305}; Single-pass type II membrane protein {ECO:0000305}.
C4QZ06	2.4.1.-		Beta-mannosyltransferase 3 (EC 2.4.1.-)	BMT3 PAS_chr1-4_0696	Komagataella pastoris (strain GS115 / ATCC 20864) (Yeast) (Pichia pastoris)	SUBCELLULAR LOCATION: Membrane {ECO:0000305}; Single-pass type II membrane protein {ECO:0000305}.
Q5ABT8	2.4.1.-		Beta-mannosyltransferase 4 (EC 2.4.1.-) (WRY family protein 1)	BMT4 WRY1 CaO19.13055 CaO19.5612	Candida albicans (strain SC5314 / ATCC MYA-2876) (Yeast)	SUBCELLULAR LOCATION: Membrane {ECO:0000305}; Single-pass type II membrane protein {ECO:0000305}.
F2QZ45	2.4.1.-		Beta-mannosyltransferase 4 (EC 2.4.1.-)	BMT4 PP7435_Chr4-0509	Komagataella pastoris (strain ATCC 76273 / CBS 7435 / CECT 11047 / NRRL Y-11430 / Wegner 21-1) (Yeast) (Pichia pastoris)	SUBCELLULAR LOCATION: Membrane {ECO:0000305}; Single-pass type II membrane protein {ECO:0000305}.
C4R7Z8	2.4.1.-		Beta-mannosyltransferase 4 (EC 2.4.1.-)	BMT4 PAS_chr4_0471	Komagataella pastoris (strain GS115 / ATCC 20864) (Yeast) (Pichia pastoris)	SUBCELLULAR LOCATION: Membrane {ECO:0000305}; Single-pass type II membrane protein {ECO:0000305}.
Q5ALW2	2.4.1.-		Beta-mannosyltransferase 5 (EC 2.4.1.-) (WRY family protein 6)	BMT5 IFQ4 WRY6 CaO19.1464 CaO19.9039	Candida albicans (strain SC5314 / ATCC MYA-2876) (Yeast)	SUBCELLULAR LOCATION: Membrane {ECO:0000305}; Single-pass type II membrane protein {ECO:0000305}.
Q5ABU8	2.4.1.-		Beta-mannosyltransferase 6 (EC 2.4.1.-) (WRY family protein 2)	BMT6 WRY2 CaO19.13045 CaO19.5602	Candida albicans (strain SC5314 / ATCC MYA-2876) (Yeast)	SUBCELLULAR LOCATION: Membrane {ECO:0000305}; Single-pass type II membrane protein {ECO:0000305}.
Q5AEC6	2.4.1.-		Beta-mannosyltransferase 7 (EC 2.4.1.-) (WRY family protein 8)	BMT7 WRY8 CaO19.342 CaO19.7975	Candida albicans (strain SC5314 / ATCC MYA-2876) (Yeast)	SUBCELLULAR LOCATION: Membrane {ECO:0000305}; Single-pass type II membrane protein {ECO:0000305}.
Q5AHD6	2.4.1.-		Beta-mannosyltransferase 8 (EC 2.4.1.-) (WRY family protein 3)	BMT8 WRY3 CaO19.8479 CaO19.860	Candida albicans (strain SC5314 / ATCC MYA-2876) (Yeast)	SUBCELLULAR LOCATION: Membrane {ECO:0000305}; Single-pass type II membrane protein {ECO:0000305}.
Q5AMH3	2.4.1.-		Beta-mannosyltransferase 9 (EC 2.4.1.-) (WRY family protein 5)	BMT9 WRY5 CaO19.12143 CaO19.4673	Candida albicans (strain SC5314 / ATCC MYA-2876) (Yeast)	SUBCELLULAR LOCATION: Membrane {ECO:0000305}; Single-pass type II membrane protein {ECO:0000305}.
H2E7T7	2.1.1.263		Botryococcene C-methyltransferase (EC 2.1.1.263) (Triterpene methyltransferase 3)	TMT-3	Botryococcus braunii (Green alga)	SUBCELLULAR LOCATION: Microsome membrane {ECO:0000305}; Single-pass membrane protein {ECO:0000305}.			H2E7T7;
Q6ZLD3	2.1.1.295		2-methyl-6-phytyl-1,4-hydroquinone methyltransferase 1, chloroplastic (EC 2.1.1.295) (37 kDa inner envelope membrane protein) (E37) (Arsenite methyltransferase 2) (OsArsM2) (MPBQ/MSBQ methyltransferase) (Protein VTE3 homolog)	ARSM2 Os07g0179300 LOC_Os07g08200 OJ1014_E09.7 OJ1361_E02.125	Oryza sativa subsp. japonica (Rice)	SUBCELLULAR LOCATION: Plastid, chloroplast inner membrane {ECO:0000250}; Single-pass membrane protein {ECO:0000250}.			Q6ZLD3;
Q2QM69	2.1.1.295		2-methyl-6-phytyl-1,4-hydroquinone methyltransferase 2, chloroplastic (EC 2.1.1.295) (37 kDa inner envelope membrane protein) (E37) (MPBQ/MSBQ methyltransferase) (Protein VTE3 homolog)	Os12g0615400 LOC_Os12g42090 OsJ_36874	Oryza sativa subsp. japonica (Rice)	SUBCELLULAR LOCATION: Plastid, chloroplast inner membrane {ECO:0000250}; Single-pass membrane protein {ECO:0000250}.			Q2QM69;
Q9LY74	2.1.1.295		2-methyl-6-phytyl-1,4-hydroquinone methyltransferase, chloroplastic (EC 2.1.1.295) (37 kDa inner envelope membrane protein) (E37) (MPBQ/MSBQ methyltransferase) (Protein ALBINO OR PALE GREEN MUTANT 1) (Protein INNER ENVELOPE PROTEIN 37) (Protein VITAMIN E DEFECTIVE 3)	VTE3 APG1 IE37 At3g63410 MAA21.40	Arabidopsis thaliana (Mouse-ear cress)	SUBCELLULAR LOCATION: Plastid, chloroplast inner membrane {ECO:0000269|PubMed:20194502}; Single-pass membrane protein {ECO:0000269|PubMed:20194502}. Note=The transmembrane domain is sufficient to direct stop-transfer insertion and topology in the inner envelope membrane. {ECO:0000269|PubMed:20194502}.			Q9LY74;
A8Y3H3	2.4.1.-		Beta-1,3-galactosyltransferase bre-2 (EC 2.4.1.-) (Bacillus thuringiensis toxin-resistant protein 2) (Bt toxin-resistant protein 2)	bre-2 CBG22997	Caenorhabditis briggsae	SUBCELLULAR LOCATION: Golgi apparatus membrane {ECO:0000255, ECO:0000305}; Single-pass type II membrane protein {ECO:0000255, ECO:0000305}.
Q6QMT2	2.4.1.-		Beta-1,3-galactosyltransferase bre-2 (EC 2.4.1.-) (Bacillus thuringiensis toxin-resistant protein 2) (Bt toxin-resistant protein 2)	bre-2 Y39E4B.9	Caenorhabditis elegans	SUBCELLULAR LOCATION: Golgi apparatus membrane {ECO:0000255, ECO:0000305}; Single-pass type II membrane protein {ECO:0000255, ECO:0000305}.			Q6QMT2;
A8Y1P7	2.4.1.-		Beta-1,4-N-acetylgalactosaminyltransferase bre-4 (EC 2.4.1.-) (Bacillus thuringiensis toxin-resistant protein 4) (Bt toxin-resistant protein 4) (Beta-4-GalNAcT)	bre-4 CBG22165	Caenorhabditis briggsae	SUBCELLULAR LOCATION: Membrane {ECO:0000255}; Single-pass type II membrane protein {ECO:0000255}.	COFACTOR: Name=Mn(2+); Xref=ChEBI:CHEBI:29035; Evidence={ECO:0000250|UniProtKB:P08037};	METAL 223 223 Manganese. {ECO:0000250|UniProtKB:P08037}.; METAL 316 316 Manganese. {ECO:0000250|UniProtKB:P08037}.	A8Y1P7;
Q9GUM2	2.4.1.-		Beta-1,4-N-acetylgalactosaminyltransferase bre-4 (EC 2.4.1.-) (Bacillus thuringiensis toxin-resistant protein 4) (Bt toxin-resistant protein 4) (Beta-4-GalNAcT)	bre-4 Y73E7A.7	Caenorhabditis elegans	SUBCELLULAR LOCATION: Membrane {ECO:0000255}; Single-pass type II membrane protein {ECO:0000255}.	COFACTOR: Name=Mn(2+); Xref=ChEBI:CHEBI:29035; Evidence={ECO:0000250|UniProtKB:P08037};	METAL 222 222 Manganese. {ECO:0000250|UniProtKB:P08037}.; METAL 315 315 Manganese. {ECO:0000250|UniProtKB:P08037}.	Q9GUM2;
Q95US5	2.4.1.-		Beta-1,3-galactosyltransferase bre-5 (EC 2.4.1.-) (Bacillus thuringiensis toxin-resistant protein 5) (Bt toxin-resistant protein 5)	bre-5 T12G3.8	Caenorhabditis elegans	SUBCELLULAR LOCATION: Golgi apparatus membrane {ECO:0000255, ECO:0000305}; Single-pass type II membrane protein {ECO:0000255, ECO:0000305}.			Q95US5;
O22476	2.7.10.1; 2.7.11.1	BINDING 597 597 Brassinolide. {ECO:0000269|PubMed:21666666, ECO:0000269|PubMed:23929946}.; BINDING 642 642 Brassinolide. {ECO:0000269|PubMed:23929946}.; BINDING 647 647 Brassinolide; via amide nitrogen. {ECO:0000269|PubMed:21666665, ECO:0000269|PubMed:21666666, ECO:0000269|PubMed:23929946}.; BINDING 705 705 Brassinolide. {ECO:0000269|PubMed:21666666}.; BINDING 911 911 ATP. {ECO:0000269|PubMed:244…	Protein BRASSINOSTEROID INSENSITIVE 1 (AtBRI1) (EC 2.7.10.1) (EC 2.7.11.1) (Brassinosteroid LRR receptor kinase)	BRI1 At4g39400 F23K16.30	Arabidopsis thaliana (Mouse-ear cress)	SUBCELLULAR LOCATION: Cell membrane; Single-pass type I membrane protein. Endosome membrane; Single-pass type I membrane protein.			O22476;
Q8GUQ5	2.7.11.1	BINDING 916 916 ATP. {ECO:0000255|PROSITE-ProRule:PRU00159}.	Brassinosteroid LRR receptor kinase (EC 2.7.11.1) (Altered brassinolide sensitivity 1) (Systemin receptor SR160) (tBRI1)	CURL3	Solanum lycopersicum (Tomato) (Lycopersicon esculentum)	SUBCELLULAR LOCATION: Cell membrane; Single-pass type I membrane protein.			Q8GUQ5;
Q8L899	2.7.11.1	BINDING 916 916 ATP. {ECO:0000255|PROSITE-ProRule:PRU00159}.	Systemin receptor SR160 (EC 2.7.11.1) (Brassinosteroid LRR receptor kinase)		Solanum peruvianum (Peruvian tomato) (Lycopersicon peruvianum)	SUBCELLULAR LOCATION: Cell membrane; Single-pass type I membrane protein.			Q8L899;
Q9ZWC8	2.7.11.1	BINDING 887 887 ATP. {ECO:0000255|PROSITE-ProRule:PRU00159}.	Serine/threonine-protein kinase BRI1-like 1 (EC 2.7.11.1) (BRASSINOSTEROID INSENSITIVE 1-like protein 1)	BRL1 At1g55610 F20N2.4	Arabidopsis thaliana (Mouse-ear cress)	SUBCELLULAR LOCATION: Cell membrane {ECO:0000269|PubMed:15486337}; Single-pass type I membrane protein {ECO:0000269|PubMed:15486337}.			Q9ZWC8;
Q9ZPS9	2.7.11.1	BINDING 866 866 ATP. {ECO:0000255|PROSITE-ProRule:PRU00159}.	Serine/threonine-protein kinase BRI1-like 2 (EC 2.7.11.1) (BRASSINOSTEROID INSENSITIVE 1-like protein 2) (Protein VASCULAR HIGHWAY 1)	BRL2 VH1 At2g01950 F14H20.2	Arabidopsis thaliana (Mouse-ear cress)	SUBCELLULAR LOCATION: Cell membrane {ECO:0000269|PubMed:15486337}; Single-pass type I membrane protein {ECO:0000269|PubMed:15486337}.			Q9ZPS9;
Q9LJF3	2.7.10.1; 2.7.11.1	BINDING 886 886 ATP. {ECO:0000255|PROSITE-ProRule:PRU00159}.	Receptor-like protein kinase BRI1-like 3 (EC 2.7.10.1) (EC 2.7.11.1) (BRASSINOSTEROID INSENSITIVE 1-like protein 3)	BRL3 At3g13380 MRP15.1	Arabidopsis thaliana (Mouse-ear cress)	SUBCELLULAR LOCATION: Cell membrane {ECO:0000269|PubMed:15486337}; Single-pass type I membrane protein {ECO:0000269|PubMed:15486337}.			Q9LJF3;
Q24157	2.4.1.62		Beta-1,3-galactosyltransferase brn (EC 2.4.1.62) (Brainiac protein) (Neurogenic secreted-signaling protein brn)	brn CG4934	Drosophila melanogaster (Fruit fly)	SUBCELLULAR LOCATION: Golgi apparatus membrane {ECO:0000305}; Single-pass type II membrane protein {ECO:0000305}.			Q24157;
A1CAI0	3.2.1.39		Probable glucan endo-1,3-beta-glucosidase btgC (EC 3.2.1.39) (Endo-1,3-beta-glucanase btgC) (Laminarinase btgC)	btgC ACLA_011750	Aspergillus clavatus (strain ATCC 1007 / CBS 513.65 / DSM 816 / NCTC 3887 / NRRL 1)	SUBCELLULAR LOCATION: Cell membrane {ECO:0000250}; Single-pass type II membrane protein {ECO:0000250}.			A1CAI0;
B0Y429	3.2.1.39		Probable glucan endo-1,3-beta-glucosidase btgC (EC 3.2.1.39) (Endo-1,3-beta-glucanase btgC) (Laminarinase btgC)	btgC AFUB_056310	Neosartorya fumigata (strain CEA10 / CBS 144.89 / FGSC A1163) (Aspergillus fumigatus)	SUBCELLULAR LOCATION: Cell membrane {ECO:0000250}; Single-pass type II membrane protein {ECO:0000250}.			B0Y429;
B8NTP7	3.2.1.39		Probable glucan endo-1,3-beta-glucosidase btgC (EC 3.2.1.39) (Endo-1,3-beta-glucanase btgC) (Laminarinase btgC)	btgC AFLA_099780	Aspergillus flavus (strain ATCC 200026 / FGSC A1120 / NRRL 3357 / JCM 12722 / SRRC 167)	SUBCELLULAR LOCATION: Cell membrane {ECO:0000250}; Single-pass type II membrane protein {ECO:0000250}.			B8NTP7;
Q4WUK5	3.2.1.39		Probable glucan endo-1,3-beta-glucosidase btgC (EC 3.2.1.39) (Endo-1,3-beta-glucanase btgC) (Laminarinase btgC)	btgC AFUA_5G08780	Neosartorya fumigata (strain ATCC MYA-4609 / Af293 / CBS 101355 / FGSC A1100) (Aspergillus fumigatus)	SUBCELLULAR LOCATION: Cell membrane {ECO:0000250}; Single-pass type II membrane protein {ECO:0000250}.			Q4WUK5;
A2QN74	3.2.1.39		Putative glucan endo-1,3-beta-glucosidase btgC (EC 3.2.1.39) (Endo-1,3-beta-glucanase btgC) (Laminarinase btgC)	btgC An07g04650	Aspergillus niger (strain CBS 513.88 / FGSC A1513)	SUBCELLULAR LOCATION: Cell membrane {ECO:0000250}; Single-pass type II membrane protein {ECO:0000250}.
[truncated: 5,047 more rows]

## Sheet: CBP with soluble isoforms
Catalytic binding proteins with soluble isoforms
[truncated: 644 more rows]

## Sheet: CBP in DrugBank
Catalytic Binding Proteins in DrugBank
[truncated: 111 more rows]

## Sheet: CBP+soluble isofrom in DrugBank
Catalytic Binding Proteins with soluble isoforms in DrugBank
[truncated: 66 more rows]
